# Supplementary material for: Comparison of different decellularization protocols for porcine centrum tendineum diaphragmatis and diaphragmatic muscle – a base for effective recellularization
Source: J Biol Eng. 2026 Jan 7;20:16. doi: 10.1186/s13036-025-00602-z (PMC12836843; doi:10.1186/s13036-025-00602-z)
Supplement: Supplementary file 7 — Supplementary Material 8: Proteomic dataset with applied rules & list of isoforms [file 13036_2025_602_MOESM7_ESM.xlsx]

## Sheet: Explanation
Supplementary file 8
Legende	Group
	native	N
	protocol 1 (Andreas et al. Modified)	ABM
	protocol 2 (Baron et al.)	B
	protocol 3 (Deeken et al.)	D
	muscle	m
	tendon	t
	myotendinous	c

## Sheet: Matrix with applied rules
Annotated.Gene	Annotated.Matrisome.Division	Annotated.Matrisome.Category	GO.term	Protein.Group	Protein.Ids	Protein.Names	First.Protein.Description	PDeCell_P72_N_c	PDeCell_P71_N_c	PDeCell_P70_N_c	PDeCell_P69_N_c	PDeCell_P68_N_c	PDeCell_P67_N_c	PDeCell_P66_N_t	PDeCell_P65_N_t	PDeCell_P64_N_t	PDeCell_P63_N_t	PDeCell_P62_N_t	PDeCell_P61_N_t	PDeCell_P60_N_m	PDeCell_P59_N_m	PDeCell_P58_N_m	PDeCell_P57_N_m	PDeCell_P56_N_m	PDeCell_P55_N_m	PDeCell_P54_D_c	PDeCell_P53_D_c	PDeCell_P52_D_c	PDeCell_P51_D_c	PDeCell_P50_D_c	PDeCell_P49_D_c	PDeCell_P48_D_t	PDeCell_P47_D_t	PDeCell_P46_D_t	PDeCell_P45_D_t	PDeCell_P44_D_t	PDeCell_P43_D_t	PDeCell_P42_D_m	PDeCell_P41_D_m	PDeCell_P40_D_m	PDeCell_P39_D_m	PDeCell_P38_D_m	PDeCell_P37_D_m	PDeCell_P36_B_c	PDeCell_P35_B_c	PDeCell_P34_B_c	PDeCell_P33_B_c	PDeCell_P32_B_c	PDeCell_P31_B_c
A1BG	Non-matrisome	Non-matrisome	GO:CC extracellular matrix (GO:0005576, GO:0005578 & GO:0031012) & GO:CC not extracellular matrix	A0A286ZUY9	A0A286ZUY9	A0A286ZUY9_PIG	0	228282	414547	290289	602212	327295	745615	676799	650218	716241	900276	881135	1021840	0	389299	45240.6	743243	364858	381114	272456	195901	32452.3	61284.1	117088	45509	503864	402499	590062	388313	434725	521188	77326.1	57325.8	38158.7	58855.8	87476.1	53937.1	55484.9	55466.6	47286.7	37675.1	37230.7	60879.6
A2M	Matrisome-associated	ECM Regulators	GO:CC extracellular matrix (GO:0005576, GO:0005578 & GO:0031012) & GO:CC not extracellular matrix	A0A5G2Q8I9	A0A5G2Q8I9	A0A5G2Q8I9_PIG	0	103290	158980	180737	232265	169533	194587	211018	330054	252868	408423	322305	177793	0	175638	38983.1	315848	220669	142245	20311	44055.2	9225.41	13437.8	41703.4	9456.78	135435	265522	179184	101864	131923	80552.6	35090.5	18126.6	32085.3	13476.9	30368.5	17453.1	43590.8	46269.6	55322.7	44096.7	25838.6	24578.3
AACS	Non-matrisome	Non-matrisome	GO:CC not extracellular matrix	A0A5G2QUK6	A0A5G2QUK6	A0A5G2QUK6_PIG	0	1050.12	0	0	0	0	0	0	0	0	0	0	2144.29	0	0	0	0	0	712.231	0	0	0	601.586	0	0	0	0	0	0	2240.78	0	0	0	1714.72	0	2740.12	1855.27	1392.26	0	0	0	1323.3	0
AAMDC	Non-matrisome	Non-matrisome	GO:CC not extracellular matrix	A0A4X1UBD1	A0A4X1UBD1	A0A4X1UBD1_PIG	0	22175.5	29860.6	26117.8	37916.7	33990.4	23388.5	8683.47	10757.5	6684.28	4839.69	12284	6785.42	0	31914	4053.08	40892.2	30700.7	24971.6	4579.13	0	2226.28	5587.91	7529.18	3484.97	0	2436.57	0	2585.32	2141.73	0	1477.46	6286.99	5066.06	4464.87	8399.58	1484.77	8888.73	15074.5	7193.07	10739	12962.1	7461.41
AARS1	Non-matrisome	Non-matrisome	GO:CC not extracellular matrix	F1S431	F1S431	F1S431_PIG	0	5363.41	5819.31	7092.67	5553.47	5534.52	6380.37	6526.76	8094.89	8341.31	8411.92	8657.95	6828.91	0	3163.86	0	4256.71	5053.3	4646.34	8056.64	6094.1	4915.62	8047.86	4365.27	6993.84	20227.8	8275	7628.55	7973.73	12331.8	0	7420.68	6661.61	8009.66	7780.48	6421.24	6259.16	8152.98	7426.37	8712.35	8693.92	7651.14	7866.81
AARS2	Non-matrisome	Non-matrisome	GO:CC not extracellular matrix	A0A287ANQ4	A0A287ANQ4	A0A287ANQ4_PIG	0	6110.84	3864.11	0	0	3882.78	0	0	1642.2	0	0	0	0	0	2112.3	0	1997.03	3594.87	4858.36	4079.21	7423.03	3021.96	4056.5	0	2477.13	2577.82	0	0	13283.7	2504.99	0	5837.16	3155.02	7234.23	0	3557.7	4819.1	8312.59	5858.48	0	9170.81	6503.27	0
AARSD1	Non-matrisome	Non-matrisome	GO:CC not extracellular matrix	A0A287BF30	A0A287BF30	A0A287BF30_PIG	0	2980.76	0	2746.49	2744.38	3251.74	0	0	0	0	1044.46	0	0	0	3067.14	4356.58	2718.64	2523.05	2253.41	3101.74	0	2749.21	3206.74	3746.32	4437.74	0	0	0	0	2439.51	0	0	2137.94	2307.12	2586.77	1866.43	1700.88	1361.92	1356.39	0	1873.12	1635.57	0
AASDHPPT	Non-matrisome	Non-matrisome	GO:CC not extracellular matrix	F1SV35	F1SV35	F1SV35_PIG	0	1548.55	4495.09	1723.29	2712.92	2060.05	3586.79	0	2117.46	3130.06	0	4604.03	1381.91	0	1838.74	0	2136.77	2183.1	2193.77	2658.08	4870.39	1660.39	1395.15	2670.68	1352.14	0	0	0	0	3787.51	0	0	1373.07	2156.87	2638.58	2009.72	1665.69	0	1068.38	0	0	0	0
AASS	Non-matrisome	Non-matrisome	GO:CC not extracellular matrix	A0A8W4FJV3	A0A8W4FJV3	A0A8W4FJV3_PIG	0	0	0	0	295.489	0	0	0	0	0	0	0	0	0	659.641	0	1118.89	0	0	0	0	0	0	0	0	0	0	0	0	0	0	0	0	678.69	0	0	0	0	0	0	0	1019.67	0
AATF	Non-matrisome	Non-matrisome	GO:CC not extracellular matrix	A0A480MDM3	A0A480MDM3	A0A480MDM3_PIG	0	0	1512.56	1182.78	1567.82	745.348	0	3767.07	2139.21	1551.69	0	3669.17	1819.05	0	296.461	0	0	470.626	0	0	1921.23	1348.68	0	0	0	0	0	0	0	938.729	0	0	0	634.387	683.629	729.539	1647.4	0	0	0	0	0	0
ABAT	Non-matrisome	Non-matrisome	GO:CC not extracellular matrix	P80147	P80147	GABT_PIG	0	0	0	0	1415.96	0	1277.69	0	0	0	0	0	2199.47	0	0	0	0	0	0	0	0	0	0	0	0	0	0	0	0	0	0	0	0	0	0	0	0	0	0	0	0	0	0
ABCA6	Non-matrisome	Non-matrisome	GO:CC not extracellular matrix	I3LPG9	I3LPG9	I3LPG9_PIG	0	0	1000.19	2386.62	1225.99	0	4538.16	6115.26	1613.25	2893.64	4105.68	0	2456.44	0	789.163	0	0	1184.64	0	1506.77	3290.72	0	1654.28	0	1077.89	2858.54	1343.52	3551.13	0	712.698	0	0	1576.03	2245.47	975.324	1409.29	1762.15	0	1331.8	0	0	0	632.128
ABCA9	Non-matrisome	Non-matrisome	GO:CC not extracellular matrix	I3LB38	I3LB38	I3LB38_PIG	0	1080.47	0	1226.95	2458.77	1105.6	0	3496.01	3776.5	3058.6	5981.07	0	3780.4	0	785.042	0	975.466	1167.83	738.79	1985.39	3337.56	390.276	1223.34	0	0	0	7130.01	7374.6	7621.86	1335.74	4448.82	1411.47	1072.75	1793.44	0	894.43	1840.67	0	1286.16	0	1958.81	881.244	0
ABCB10	Non-matrisome	Non-matrisome	GO:CC not extracellular matrix	F1RG41	F1RG41	F1RG41_PIG	0	0	0	0	842.026	0	0	0	0	0	0	0	0	0	1595.76	0	0	1668.84	0	0	0	0	1574.97	0	2688.76	0	0	0	0	3043.79	0	0	1940.93	0	0	2019.89	2122.46	0	4582.24	3789.82	3237.02	2600.2	4049.04
ABCB6	Non-matrisome	Non-matrisome	GO:CC not extracellular matrix	F1SR85	F1SR85	F1SR85_PIG	0	0	0	0	0	0	0	0	0	0	0	0	0	0	647.908	0	0	0	0	0	0	0	1970.65	0	0	0	0	0	0	0	0	0	755.646	0	0	751.514	0	0	1490.09	0	1937.98	973.144	0
ABCB7	Non-matrisome	Non-matrisome	GO:CC extracellular matrix (GO:0005576, GO:0005578 & GO:0031012) & GO:CC not extracellular matrix	A0A286ZXE4	A0A286ZXE4	A0A286ZXE4_PIG	0	1417.07	0	1416.46	1099.06	1290.22	0	0	0	0	0	0	0	0	948.152	0	1826.3	2217.16	1750.53	2097.29	4066.19	2694.29	3615.59	2837.8	3094.25	0	0	0	0	2429.78	0	2753.27	2007.52	2546.22	3266.73	2028.08	3848.77	2336.02	2216.44	5889.49	6283.03	2434.82	4093.46
ABCB8	Non-matrisome	Non-matrisome	GO:CC not extracellular matrix	A0A480MTR8	A0A480MTR8	A0A480MTR8_PIG	0	0	0	1793.15	616.762	1554.86	919.681	0	0	0	1431.76	0	1151.71	0	1469.59	0	1498.64	2511.72	1807.72	1690.31	0	0	1867.57	803.981	1182.76	0	0	0	1747.77	882.88	0	2862.72	2544.93	2803.57	3918.94	2396.78	1465.77	3573.34	3852.88	6016.28	6709.49	3819.36	5305.88
ABCC1	Non-matrisome	Non-matrisome	GO:CC not extracellular matrix	A0A287ABK7	A0A287ABK7	A0A287ABK7_PIG	0	2156.75	1947.45	0	1751.91	432.305	1584.9	0	2295.18	0	3909.02	3475.85	0	0	1092.78	0	724.926	1091.58	1243.7	3338.34	2698.24	0	914.423	0	819.248	4983.08	0	4162.82	0	2236.35	3747.04	1425.54	2346.58	1834.19	1206.96	724.005	1375.42	3237.75	3147.29	0	4894.14	2538.5	2340.63
ABCC3	Non-matrisome	Non-matrisome	GO:CC not extracellular matrix	A0A5G2R2F8	A0A5G2R2F8	A0A5G2R2F8_PIG	0	0	0	0	1583.45	0	0	2158	1763.42	2211.16	1620.08	1494.44	1991.65	0	0	0	0	0	0	0	0	0	0	0	0	4018.61	4333.93	5028.68	0	1331.24	2600.63	0	0	718.973	1436.51	0	0	0	0	0	0	0	0
ABCC9	Non-matrisome	Non-matrisome	GO:CC not extracellular matrix	A0A4X1VEZ1	A0A4X1VEZ1;F1S9A6	A0A4X1VEZ1_PIG	0	0	0	0	0	687.194	0	0	0	0	1455.09	0	0	0	769.546	0	0	690.314	0	1119.41	2913.42	2397.27	1109.14	0	1331.5	0	0	5375.78	0	553.085	0	2726.55	2006.55	2191.94	0	1722.49	3094.47	2897.09	2365.89	3996.34	4876.85	2030.47	2419.65
ABCD3	Non-matrisome	Non-matrisome	GO:CC not extracellular matrix	I3LI20	I3LI20	I3LI20_PIG	0	2675.91	1773.06	3728.35	3571.32	2550.81	12121.6	16272.2	11211.6	7317.85	13747.7	15821.7	16078.3	0	1292.21	0	2016.28	2320.85	2085.86	9841.99	15093.3	5379.68	9130.88	5184.22	7975.55	40560.6	14617.8	7670.78	16916.6	14768.2	15053.3	9003.41	6468.08	5913.63	10317.2	7366.14	9642.19	10453	8239.32	14964.1	13196.4	6484.94	10246.9
ABCE1	Non-matrisome	Non-matrisome	GO:CC not extracellular matrix	A0A5K1V8K4	A0A5K1V8K4	A0A5K1V8K4_PIG	0	11392.9	10659.3	15732.4	11430.3	11109.3	12179.6	12843.2	10438.7	12410.9	15297.4	14587.1	11959.4	0	9642.87	0	10815.1	9966.24	9651.38	12725.6	18912.1	12085.3	16150.3	9544.79	14228	30481.5	8819.13	19379.8	11706.5	20528.5	11101	13357.5	15306.7	19871.9	16194.9	13139.9	19675.7	14791.5	10739.9	10568.2	13297.4	12225.5	12228.2
ABCF1	Non-matrisome	Non-matrisome	GO:CC not extracellular matrix	Q767L0	Q767L0	ABCF1_PIG	0	6372.99	5120.71	5079.11	4635.19	4608.78	6503.75	6895.82	5987.87	6240.66	8317.73	8893.43	7640.56	0	4177.28	0	3068.98	4241.08	3931.54	6021.38	11090.4	5752.03	5915.4	4402.8	6252.14	12901.7	6260.46	17045.6	11554.1	19040.3	13226.3	5580.7	5811.15	4965.98	7016.91	5458.33	6888.35	5226.36	6937.23	7256.34	6333.66	6513.08	8093.87
ABCF3	Non-matrisome	Non-matrisome	GO:CC not extracellular matrix	I3LB03	I3LB03	I3LB03_PIG	0	1633.8	0	2454.82	1825.57	1896.38	0	0	0	2755.24	0	0	3610.98	0	1013.16	0	1221.69	2382.3	3336.21	5151.28	8153.72	4966.56	6075.71	3666.52	5121.13	0	0	6209.11	0	11363.4	5840.67	3854.52	3743.29	4068.15	7034.06	3068.94	6088.2	0	3176.03	0	0	3929.81	3494.71
ABCG2	Non-matrisome	Non-matrisome	GO:CC not extracellular matrix	Q8MIB3	Q8MIB3;A0A900QS94;A0A5S6GWJ4	ABCG2_PIG	0	814.676	0	505.497	950.628	0	0	0	0	0	0	0	0	0	740.331	0	0	0	0	0	0	0	0	0	0	0	0	0	0	780.802	0	0	0	1171.38	0	0	0	0	1164.15	0	1671.11	0	0
ABCG5	Non-matrisome	Non-matrisome	GO:CC not extracellular matrix	A0A287BJK7	A0A287BJK7	A0A287BJK7_PIG	0	0	5824.95	7179.8	4480.86	5306.46	0	4807.79	4905.13	0	0	0	0	0	0	0	4887.9	0	4200.57	0	0	0	0	0	4120.55	0	0	0	0	0	0	0	0	5024.13	0	2181.2	0	1662.62	3892.54	0	2477.96	3168.86	0
ABHD10	Non-matrisome	Non-matrisome	GO:CC not extracellular matrix	A0A287AL53	A0A287AL53	A0A287AL53_PIG	0	3355.23	7130.64	9543.25	4661.39	7004.74	11650.5	5130.61	1580.41	7337.27	1967.66	13452.4	3709.29	0	7679.85	14507.4	9072.57	4624.35	8149.38	2347.51	2090.15	0	1550.6	4322.88	0	3408.67	0	3021.98	1691.33	1676.81	0	1550.65	2206.53	195.979	1477.34	2221.91	0	2451	2380.32	0	0	815.56	3143.63
ABHD11	Non-matrisome	Non-matrisome	GO:CC not extracellular matrix	F1RJM8	F1RJM8	F1RJM8_PIG	0	8324.5	9152.91	10805	10265.7	12329.4	11147.4	4281.51	3127.42	5514.72	0	5437.96	3166.05	0	8156.24	0	14303.3	9308.21	10272.5	4034.95	8347.91	7565.37	5766.36	11437.9	10884.4	5487.78	0	7751.03	3668.1	2171.85	3833.83	2713.66	4165.14	4796.99	6875.92	5009.95	7286.08	7287.16	6212.9	7973.6	4141.76	8420.39	12073
ABHD12	Non-matrisome	Non-matrisome	GO:CC not extracellular matrix	I3LGA2	I3LGA2	I3LGA2_PIG	0	0	0	0	1241.44	0	1910.15	5387.72	1841.7	2697.08	3682.98	0	3703.39	0	0	0	0	0	0	0	0	0	0	0	0	2598.29	0	0	1602.4	1639.67	3091.59	0	0	721.092	0	578.948	0	0	1529.57	2920.65	3383.93	1341.22	1533.24
ABHD14B	Non-matrisome	Non-matrisome	GO:CC not extracellular matrix	A0A287A5T1	A0A287A5T1	A0A287A5T1_PIG	0	3433.7	7024.28	5124.75	11173.8	6610.98	6425.31	7476.37	8477.7	7013.74	7641.92	11535.1	7534.91	0	9694.43	7359.94	6138.7	6247.67	5328.92	0	0	0	0	0	0	0	0	0	0	4789.08	0	0	1068.4	0	0	0	0	0	4160.86	0	0	3225.42	3987
ABHD16A	Non-matrisome	Non-matrisome	GO:CC not extracellular matrix	A0A287AWB5	A0A287AWB5	A0A287AWB5_PIG	0	1340.77	0	0	0	0	0	0	0	0	0	0	0	0	1467.8	0	0	0	0	1642.62	0	0	1274.27	0	0	0	0	0	0	2662.99	0	4458.99	2320.48	3164.35	0	2507.4	0	4511.63	3548.81	3736.97	5359.05	2902.84	4020.53
ABHD17A;ABHD17C	Non-matrisome	Non-matrisome	gene not present in GO IDs	F1SDH7;K7GKA9	F1SDH7;K7GKA9	F1SDH7_PIG;K7GKA9_PIG	0	0	0	0	0	0	0	0	0	0	1997.82	2914.35	1506.07	0	0	0	0	0	0	0	0	0	0	0	0	2649.58	0	2436.51	0	0	0	0	0	0	0	0	0	0	0	0	0	0	0
ABHD4	Non-matrisome	Non-matrisome	GO:CC not extracellular matrix	A0A287B2G3	A0A287B2G3	A0A287B2G3_PIG	0	0	0	0	0	0	0	0	0	0	0	0	0	0	869.23	0	0	0	0	0	0	0	0	0	0	0	0	0	0	0	0	0	0	0	0	0	0	0	0	0	0	0	0
ABHD5	Non-matrisome	Non-matrisome	GO:CC not extracellular matrix	Q5EE05	Q5EE05;F1SRD1	ABHD5_PIG	0	0	0	0	0	714.531	0	0	0	0	0	0	0	0	1653.98	0	879.738	0	0	2140.34	0	1077.61	0	1119.99	0	0	0	0	0	0	0	1269.82	1698.45	1677.02	0	1611.75	760.074	0	1502.64	0	0	700.643	0
ABI1	Non-matrisome	Non-matrisome	GO:CC not extracellular matrix	F1RTW7	F1RTW7;A0A287AUY1	F1RTW7_PIG	0	2325.88	2141.18	0	2582.51	1588.19	0	4110.29	5013.74	7519.86	6274.73	4455.76	4885.93	0	948.895	0	1771.73	1678.47	0	2625.79	0	912.069	0	1255.22	1789.85	3713.54	0	3571.77	0	3429.59	0	0	1090.14	1341.22	968.718	1363.12	0	0	0	0	0	0	0
ABI3BP	Core matrisome	ECM Glycoproteins	GO:CC extracellular matrix (GO:0005576, GO:0005578 & GO:0031012) & GO:CC not extracellular matrix	A0A5G2QWN3	A0A5G2QWN3	A0A5G2QWN3_PIG	0	11916.4	14436.3	11251.9	38003.1	9824.3	57989.8	61066.6	82515.1	90087.1	88595.2	102258	75664.9	0	3960.59	11302.5	7493.15	3809.89	4137.92	23135.7	32917.9	4883.36	6595.85	4729.73	3673.45	75043.1	143279	147540	109010	62858.9	114935	2469.95	3399.63	6226.29	9513.13	10647.5	5420.75	0	3324.06	12567.3	4915.27	2648.61	8851.5
ABLIM1	Non-matrisome	Non-matrisome	GO:CC not extracellular matrix	F1S4V5	F1S4V5	F1S4V5_PIG	0	6166.4	5961.23	6233.84	4093.89	6405.24	13177.7	12053	3848.14	17783.4	9650.88	12496.3	10158.6	0	2841.07	0	6085.84	5634	3641.05	6513.5	7306.43	6341.76	5960.43	6196	5336.42	0	0	0	0	0	0	2560.56	3408.89	6129.21	6827.57	6030.87	3199.9	0	1291.35	0	0	5239.56	2750.48
ABLIM2	Non-matrisome	Non-matrisome	GO:CC not extracellular matrix	A0A8W4FPH9	A0A8W4FPH9	A0A8W4FPH9_PIG	0	4174.36	4942.06	4253.24	1989.11	5036.51	0	0	0	0	0	0	0	0	3986.9	0	2948.69	5323.26	2951.59	5057.98	0	5924.97	4664	4870.02	5214.08	0	0	0	0	0	0	6058.3	6006.02	6113.16	7613.08	6736.31	6204.83	0	1845.62	0	0	1212.98	3241.99
ABLIM3	Non-matrisome	Non-matrisome	GO:CC not extracellular matrix	F1RLA7	F1RLA7	F1RLA7_PIG	0	0	0	0	0	1910.08	0	0	768.186	2561.2	0	0	0	0	2031.29	0	0	750.249	0	5500.27	3976.12	4955	3795.36	3691.68	3521.27	0	0	0	0	0	1508.26	4767.24	2845.83	2234.38	4182.79	2558.34	4214.96	0	0	0	0	948.487	4443.52
ABR	Non-matrisome	Non-matrisome	GO:CC not extracellular matrix	A0A287A0G2	A0A287A0G2	A0A287A0G2_PIG	0	0	0	0	1775.13	1017.4	5827.34	5579.66	4765.17	3424.35	6919.18	0	2763.4	0	0	0	0	0	0	2820.98	0	398.721	1028.04	0	1284.35	8869.87	3668.77	8205.75	7883.67	6918.9	6495.87	1603.27	1119.56	1367.86	0	1227.14	1638.9	1626.4	1327.83	0	0	1316.94	0
ABRA	Non-matrisome	Non-matrisome	GO:CC not extracellular matrix	B5SNZ6	B5SNZ6;A0A286ZTQ0	ABRA_PIG	0	1105.07	0	0	0	0	0	0	0	0	0	0	0	0	693.672	0	593.227	740.784	0	1354.17	0	3042.22	1404.85	2146.11	3045.43	0	0	0	0	0	0	0	1946.36	0	1259.55	1479.78	1616.99	0	1158.55	0	0	1151.32	0
ABRAXAS2	Non-matrisome	Non-matrisome	GO:CC not extracellular matrix	A0A4X1V7C1	A0A4X1V7C1	A0A4X1V7C1_PIG	0	1869.29	0	1113.15	2227.97	1498.57	0	2648.51	0	2591.58	0	0	0	0	936.543	0	1554.02	0	1662.64	1512.5	0	1349.39	1055.72	1159.66	0	0	0	0	0	3549.71	0	0	1046.38	1838.58	1001.64	1063.62	2352.08	1886.58	0	0	0	944.246	0
ACAA1	Non-matrisome	Non-matrisome	GO:CC extracellular matrix (GO:0005576, GO:0005578 & GO:0031012) & GO:CC not extracellular matrix	A0A8D0SAU2	A0A8D0SAU2	A0A8D0SAU2_PIG	0	11519.6	14597.7	19108.7	32478.2	16634.9	36936	12291	11364.3	10967.7	11413.7	18595	52962.4	0	30486.1	173094	20963.2	12168.4	12291.6	35648.8	19973.4	12439.5	14879	21137.3	14053.5	25991.2	12929.8	11092.3	4968.11	22834.5	11149.6	10783.7	16850.8	21020.1	14581.5	30329.3	7131.99	5443.6	3519.7	0	8100.81	12702.4	7762.24
ACAA2	Non-matrisome	Non-matrisome	GO:CC not extracellular matrix	D0G0B3	D0G0B3	D0G0B3_PIG	0	42224.2	63830.2	46098.5	43733.1	74962.3	31697.3	18202	25783.5	11056.1	10111.2	27080.7	18289.8	0	79816.2	14379.7	78046.3	83680.7	74844.2	95794.9	50229.6	141153	137248	70077.4	94021.5	24655.1	22868.4	22736.5	40055.7	33376.4	37242.7	85396.7	99279.3	116833	103483	96898	98937.1	118682	90229.1	94629.1	127284	129852	113611
ACACA	Non-matrisome	Non-matrisome	GO:CC not extracellular matrix	A0A287BBE6	A0A287BBE6	A0A287BBE6_PIG	0	1318.04	0	3101.68	2514.26	1703.57	7699.15	0	0	2102.65	4367.89	0	5666.19	0	1115.7	19533.1	3197.13	0	0	5027.34	6391.88	0	1512.01	2991.89	2474.01	4974.6	0	7112.72	0	4035.98	7807.51	2193.33	2436.72	5456.87	0	4115.11	2989.2	0	1542.61	0	5428.99	1861.36	0
ACACB	Non-matrisome	Non-matrisome	GO:CC not extracellular matrix	A0A8W4FHN1	A0A8W4FHN1	A0A8W4FHN1_PIG	0	947.356	1631.36	1131.99	1050.35	1106.2	0	0	0	0	0	0	4475.76	0	1289.16	0	1151.39	1375.02	1320.53	785.094	0	782.69	1041.42	0	734.596	0	0	0	0	0	7015.08	1832.75	1289.21	1836.95	1540.74	1206.74	934.028	3377.24	2021.11	0	4082.73	1464.93	2212.23
ACAD10	Non-matrisome	Non-matrisome	GO:CC not extracellular matrix	F1RL48	F1RL48	F1RL48_PIG	0	9899.2	18042	14619	10684.1	14107.8	12107.9	7493.23	11730	6266.47	5096.45	6412.44	7128.8	0	10146.5	52483.6	12136.9	16766.2	9383.67	11833.4	14019.3	7336.49	7306.88	9523.49	8192.89	12621.9	0	7089.91	8104.04	3507.55	4366.52	10056.4	7068.66	12095.1	10227.9	10484.9	11968.3	15834	12485.4	10141.4	13240.1	14578.1	16810.5
ACAD8	Non-matrisome	Non-matrisome	GO:CC not extracellular matrix	A0A8W4FBI6	A0A8W4FBI6	A0A8W4FBI6_PIG	0	6235.97	5397.69	4907.2	3947.09	5362.36	4189.16	3516.28	0	1225.24	1698.38	0	0	0	8426.03	0	5596.52	4576.5	4949.03	3060.86	0	1898.55	2571.21	4384.7	1707.65	0	0	0	0	2336.45	0	3862.83	3525.12	5105.46	3687.64	4592.83	2548.98	6936.37	4202.54	6898.87	7364.1	5582.88	4355.67
ACAD9	Non-matrisome	Non-matrisome	GO:CC not extracellular matrix	I3LUR5	I3LUR5	I3LUR5_PIG	0	5059.96	3625.2	5669	4273.73	4528.48	3738.11	2308.93	2038.24	3301.31	3799.15	5914.74	2227.4	0	5094.4	0	5379.77	4719.31	4485.23	5042.61	5018.46	6490.73	5058.4	4127.34	5772.96	6462.62	5097.15	10004.2	5229.77	4549.42	7201.63	5700.93	5124.58	6301.1	7956.46	4858.42	5201.34	7160.28	4987.18	8529.04	11928.6	4652.42	6872.1
ACADL	Non-matrisome	Non-matrisome	GO:CC not extracellular matrix	P79274	P79274	ACADL_PIG	0	65395.6	106336	83341.9	92249.7	94853.6	61983.2	16041.8	30823.2	13779.9	10921	37419	17681.8	0	130170	28648.4	173815	83972.1	103392	26420.1	18570.5	14534.6	34203.9	56633.9	33070.4	5610.8	8948.26	0	12889.7	7597.44	11160.7	31941.7	36445.4	25206.3	35917.2	55255.3	31677.9	75314.6	55464.1	49340.8	49649.4	72261.3	79892.3
ACADM	Non-matrisome	Non-matrisome	GO:CC not extracellular matrix	P41367	P41367	ACADM_PIG	0	55962.5	73559.5	31918.9	68672.3	81285	64421.7	29626.7	28310.1	15557.6	14389.2	28683.7	17729.1	22390400	72176.6	33684.7	91152	102483	134357	24371.5	19097	8396.9	14588.2	37974.5	17661.9	15885.7	13770.4	12564.9	28119	10292.5	16616.2	17511.7	20055.5	14049.9	22030.9	33506.2	18861.4	18752.3	18911	11985.1	13254.7	36404.7	29380.5
ACADS^	Non-matrisome	Non-matrisome	GO:CC not extracellular matrix	P79273	P79273;A0A287AP64	ACADS_PIG	0	53200.1	54770.9	59448.4	50202.7	70765.6	32066.1	17196	16896.9	14184.6	10171.7	23585.1	12261	0	61238.2	37166.4	109061	62285.6	83435.8	37761.4	33575.8	33132.2	37780.1	43967.6	34438.3	21061.1	17837.1	12585.4	26701.7	12502.1	22891	41938.8	38438.4	48539.7	58237.4	52490.2	42585.1	50539.3	42991.8	47826	50367.1	53188.6	45002.8
ACADS°	Non-matrisome	Non-matrisome	GO:CC not extracellular matrix	A0A287AP64	A0A287AP64	A0A287AP64_PIG	0	35686	22051.5	27602.9	41525.2	45222.7	20899	8078.09	11946.7	8523.6	5041.09	14069.8	9403.79	0	58097.7	9198.44	72139.8	37968.2	41112	21140	8617.99	18015.8	22028.7	17896	24821.8	16059.6	9320.41	6695.5	6351.03	7025.56	9032.51	29941.5	26956.7	35337.7	28753.1	44364.5	19913.6	29846.4	36412.6	27914.4	38973.2	38062.8	23860
ACADSB	Non-matrisome	Non-matrisome	GO:CC not extracellular matrix	F1SED0	F1SED0	F1SED0_PIG	0	20078.4	15386.3	16436.6	11483.2	22201.5	7197.94	7360.94	5234.39	6192.74	3604.36	5853.22	6386.8	0	21655.6	1939.91	17248.8	18248.5	20231.2	11546	8992.96	16757.2	15626	13517.3	17051.1	4608.31	20315.3	8727	9489.3	3985.57	9958.23	13285.7	12810.2	16092.8	13016.8	15967.5	12741.1	7697.65	7695.6	7138.67	8566.3	8858.27	10554.4
ACADVL	Non-matrisome	Non-matrisome	GO:CC not extracellular matrix	F1ST43	F1ST43	F1ST43_PIG	0	89077.6	80727.3	62460.4	46188.9	94379.6	37596.6	10577.8	23415.8	9282.36	9584.72	42938.5	18250.1	24415500	139540	93403.6	84618.9	93102.1	114037	82733.9	46404.4	184057	146551	98503.6	120713	10350.2	18524.4	12306.8	35775.1	13984.4	32137.9	107446	89380.2	91911.1	115919	85337.4	122922	59594.7	62161.6	67696.9	97690.2	54672.4	69000.5
ACAN^	Core matrisome	Proteoglycans	GO:CC extracellular matrix (GO:0005576, GO:0005578 & GO:0031012) & GO:CC not extracellular matrix	Q29011	Q29011;A0A287B863	PGCA_PIG	0	1190.97	1286.04	0	1753.37	1112.31	8722.5	9322.51	13381	13712.3	17489.9	17682.7	6611.9	0	0	0	0	0	0	1482.86	4444.55	0	867.288	0	0	32786.4	34816.7	75788.4	33920	27241.6	23146.3	0	0	0	0	0	0	0	0	0	0	0	0
ACAN°	Core matrisome	Proteoglycans	GO:CC extracellular matrix (GO:0005576, GO:0005578 & GO:0031012) & GO:CC not extracellular matrix	A0A287B863	A0A287B863	A0A287B863_PIG	0	0	0	0	0	0	13692.5	0	10527.2	19440.5	12114.7	18639.2	7908.11	0	0	0	0	0	0	3091.2	0	0	0	0	0	76918.2	20513.6	88899.9	26179.6	27297.9	34243.7	0	0	0	0	0	0	0	0	0	0	0	0
ACAP2	Non-matrisome	Non-matrisome	GO:CC not extracellular matrix	A0A481BXN1	A0A481BXN1	A0A481BXN1_PIG	0	791.639	0	0	775.139	0	1025.91	2087.58	0	3750.32	1969.75	0	0	0	341.637	0	0	0	719.333	0	0	0	0	0	0	2523.18	0	1047.03	1008.43	4011.83	0	0	0	0	0	0	0	0	0	0	0	588.247	0
ACAT1	Non-matrisome	Non-matrisome	GO:CC not extracellular matrix	I3LP02	I3LP02	I3LP02_PIG	0	99362.5	82458.2	106374	122231	85388.5	70467.5	29490.6	26416.9	30552.5	17355.3	37241.1	19669.7	0	129341	42943.8	166884	83445.9	98210.9	51800.9	22981.9	24467.9	32673.6	51461.2	41519.4	14103.3	8600.5	7265.33	16093.5	13124.1	9531.22	16058.2	37571.8	55591.8	27872.8	61995.2	22459.4	27712.3	28003.4	17714.9	20462.9	45852.5	31813.8
ACAT2	Non-matrisome	Non-matrisome	GO:CC not extracellular matrix	A0A287AHQ0	A0A287AHQ0	A0A287AHQ0_PIG	0	1096.22	0	2403.13	2513.81	1509.14	0	2023.32	0	2494.49	3779.76	0	0	0	921.453	0	1551.06	0	0	0	0	0	0	0	0	0	0	0	0	1595.99	0	0	0	0	0	881.711	0	0	0	0	0	753.595	0
ACBD3	Non-matrisome	Non-matrisome	GO:CC not extracellular matrix	I3LPF1	I3LPF1	I3LPF1_PIG	0	7720.52	8743.34	14921.2	9306.8	15995.1	27858.6	32202.8	14462.1	12534.1	51467.1	58173.3	18289.3	0	9338	0	15517.8	24009.1	8547.62	4799.01	13852.1	10281.7	8097.23	15478.4	9819.25	21595.6	7925.31	25167.5	7626.22	18601.7	12556.5	4184.26	5703.05	8140.93	10700.1	6680.19	3798.5	1554.95	2006.23	2494.25	0	4014.65	3319.81
ACBD5	Non-matrisome	Non-matrisome	GO:CC not extracellular matrix	A0A287BIS1	A0A287BIS1	A0A287BIS1_PIG	0	0	0	0	0	617.224	0	0	0	0	2039.6	0	0	0	576.154	0	0	0	0	2279.77	0	1318.83	2167.32	1397.38	943.763	0	0	0	0	1465.17	0	0	1386.09	1145.29	2590.96	1569.54	1551.17	3213.36	4755.47	4826.74	3489.91	2703.28	0
ACBD6	Non-matrisome	Non-matrisome	GO:CC not extracellular matrix	F1S683	F1S683	F1S683_PIG	0	1424.92	0	1514.73	0	1383.17	0	0	0	1953.16	0	0	0	0	786.33	0	0	1289.08	955.584	1365.71	2301.66	1959.73	1992.92	1901.13	2169.03	0	2384.26	3730.36	1143.54	3462.03	0	1595.62	1680.64	1022.03	1973.34	1838.76	1546.87	0	987.98	0	1445.32	663.959	1629.11
ACCS	Non-matrisome	Non-matrisome	GO:CC not extracellular matrix	F1SHI0	F1SHI0	F1SHI0_PIG	0	0	0	0	4117.13	2468.89	10823.8	9621.7	0	13066.3	13862.3	19789.1	23193	0	0	0	0	0	0	0	0	0	0	0	0	21484.3	9193.77	15089.3	6630.76	4606.72	9060.33	0	0	0	0	1640.33	4071.18	0	0	0	0	2079.43	0
ACE	Non-matrisome	Non-matrisome	GO:CC extracellular matrix (GO:0005576, GO:0005578 & GO:0031012) & GO:CC not extracellular matrix	F1RRW5	F1RRW5	ACE_PIG	0	8413.34	35385.8	30634.3	16814	36105.3	40095.2	20110.7	24831.2	17478.5	31434.6	48622.6	24237.5	0	15130.9	64427.9	28451.4	39362	21608.2	13302.9	20193.9	5478.89	4705.56	15439.5	4616.53	21505.7	24873.4	22203.6	17718	4497.55	8099.13	11127.2	10897.2	9317.71	7835.96	7682.8	11339.8	15553	5618.1	12665	6989.26	10971.6	9269.07
ACIN1	Non-matrisome	Non-matrisome	GO:CC not extracellular matrix	A0A5G2R3D2	A0A5G2R3D2	A0A5G2R3D2_PIG	0	1568.11	1445.88	0	2860.55	1607.83	3926.3	4934.61	4127.65	5635.67	3484.49	4149.96	4503.26	0	624.832	0	0	0	0	2106.15	0	0	993.058	0	1053.41	0	0	0	0	4473.36	0	0	1263.98	0	0	1439.28	1537.11	0	1171.42	0	1551.26	0	0
ACLY	Non-matrisome	Non-matrisome	GO:CC extracellular matrix (GO:0005576, GO:0005578 & GO:0031012) & GO:CC not extracellular matrix	A0A8D0NPF0	A0A8D0NPF0	A0A8D0NPF0_PIG	0	4594.15	2550.61	9805.69	11050.5	5576.03	13818.1	11332.5	6345.64	10700	11386.9	8104.5	19297.9	0	3019.79	26925.3	2921.13	3860.42	4015.97	9916.17	5480.16	2084.34	2643.53	4905.08	4331.67	22303.6	11984.7	10681.1	14347.4	16550.7	12996.6	4549.34	3201.25	10292.5	3244.89	10847.8	4169.12	5233.83	3994.39	0	4872.07	5327.8	2769.29
ACO1	Non-matrisome	Non-matrisome	GO:CC not extracellular matrix	A0A287BQT2	A0A287BQT2	A0A287BQT2_PIG	0	6503.76	9144.29	8581.16	13508.9	8673.34	7163.65	5560.41	5039.36	3715.78	6238.29	5269.95	5150.69	0	10138.6	40190.2	12163.8	8119.02	10591.1	2989.76	3426.33	2027.33	2417.51	4194.14	2173.86	0	0	0	0	2241.76	0	1796.4	2131.35	2449.73	2860.04	4142.39	2293.59	6057.47	6379.52	5337.88	6168.99	6998.21	5833.41
ACO2^	Non-matrisome	Non-matrisome	GO:CC not extracellular matrix	P16276	A0A8W4FBS4;P16276	ACON_PIG	0	307712	348413	300435	326598	325281	214627	77638	122226	50352.5	33133.7	138992	68768.6	0	491590	157613	466548	349685	524840	99141.7	38668	38838.1	70798.3	124148	97016.1	16029.2	26135.1	14736.7	27122	28378.6	23688.1	46297.3	108379	144249	71768.8	167273	45632.7	202181	209217	108088	173722	218739	263374
ACO2°	Non-matrisome	Non-matrisome	GO:CC not extracellular matrix	A0A8W4FBS4	A0A8W4FBS4	A0A8W4FBS4_PIG	0	5104.54	0	1104.81	2492.53	2370.41	0	0	0	0	0	0	0	0	34282.5	0	4752.24	0	1751.06	0	0	0	0	0	0	0	0	0	0	1841.31	0	0	1234.89	0	0	0	0	0	0	0	0	0	0
ACOT13	Non-matrisome	Non-matrisome	GO:CC not extracellular matrix	A0A4X1VNM5	A0A4X1VNM5	A0A4X1VNM5_PIG	0	26689.3	25909.9	31145.8	25591.8	29870.5	22697.2	9496.44	8049.41	3358.12	3363.38	8784.85	7446.5	0	57595.1	0	59893.9	34655.3	52550.4	15867.9	16214.6	7709.16	14590.4	22889.3	11301.2	0	2198.29	2881.91	5082.23	5163.03	8332.79	8945.68	17950	20814.2	16301.6	19359.3	13144.6	15074	17346.6	28778.9	22884.9	21564.5	22149
ACOT8	Non-matrisome	Non-matrisome	GO:CC not extracellular matrix	I3LA89	I3LA89	I3LA89_PIG	0	0	0	1233.09	509.625	0	0	0	0	0	0	0	0	0	553.223	0	638.48	532.517	697.041	937.641	0	640.138	919.854	678.319	367.159	0	0	0	0	0	0	0	727.602	0	521.887	712.431	919.124	0	762.377	0	1163.84	0	0
ACOT9	Non-matrisome	Non-matrisome	GO:CC not extracellular matrix	A0A8W4FG64	A0A8W4FG64	A0A8W4FG64_PIG	0	20085.4	15414.1	12694.9	18595.3	18894.4	10200.1	13526.6	10595.1	14411.6	11252.5	15808.8	9328	0	16645.6	0	21345.6	15163.5	17494.6	17971.9	11061.5	33605.2	22840.8	14528.9	19783.5	25458	15429.5	12781.9	20275.5	19906.1	9739.06	15835.5	14075.9	12795.1	29450	16132.9	16740.6	23120.7	21041.2	24041.1	29443.3	20816.2	25171
ACOX1	Non-matrisome	Non-matrisome	GO:CC extracellular matrix (GO:0005576, GO:0005578 & GO:0031012) & GO:CC not extracellular matrix	A0A480YT82	A0A480YT82	A0A480YT82_PIG	0	2622.14	3833.64	3364	5193.28	2969.34	7080.74	5234.75	4728.55	5757.23	5508.26	10319.5	6155.13	0	1736.5	0	2556.66	2828.02	2435.88	3987.75	6738.07	1535.35	2766.76	2501.43	2684.71	10029.5	0	3267.52	2799.66	3759.24	3181.74	4622.07	2757.3	3879.5	3424.68	3651.15	3307.76	5260.06	2652.68	0	3082.57	2754.42	2241.91
ACOX3	Non-matrisome	Non-matrisome	GO:CC not extracellular matrix	A0A287BF51	A0A287BF51	A0A287BF51_PIG	0	0	0	0	0	856.423	1551.97	0	2139.59	2621.65	2913.72	0	0	0	677.427	0	970.081	1187.98	1250.28	1072.85	0	0	0	0	0	0	0	0	0	0	0	0	0	0	0	0	0	0	0	0	0	0	0
ACP1	Non-matrisome	Non-matrisome	GO:CC not extracellular matrix	P81693	P81693	PPAC_PIG	0	10540.2	21681.5	16182.8	19356.3	16105.4	13372.1	9605.48	6984.34	10105.4	10224	10693.1	8599.06	0	11077	0	17642.2	12596.2	14902.9	0	0	0	2957.41	6410.27	0	0	0	0	0	0	0	2075.97	3416.2	0	2600.11	4718.13	0	4611.86	4815.67	3152.49	4113.6	4379.58	4121.06
ACSF2	Non-matrisome	Non-matrisome	GO:CC not extracellular matrix	A0A287B956	A0A287B956	A0A287B956_PIG	0	2551.77	0	3976.49	4104.33	1959.1	3939.62	8452.09	3690.68	6977.96	9087.28	0	4955.06	0	2049.65	0	2670.26	2313.78	2163.35	6295.32	0	2016	3190.34	1999.51	3668.56	8667.22	10340.2	10882.4	7535.62	11013.6	13941.2	3081.47	2294.98	3517.84	2815.18	2723.11	3189.03	2842.36	1687.81	3604.11	2523.92	2206.69	3500.62
ACSF3	Non-matrisome	Non-matrisome	GO:CC not extracellular matrix	A0A286ZYB0	A0A286ZYB0	A0A286ZYB0_PIG	0	5619.37	4682.43	5260.19	2597.23	6246.61	5455.43	0	1454.44	1213.57	1993.77	0	1969.22	0	4028.87	0	4110.39	5600.1	5978.82	6582.31	5769.57	7672	8374.66	5919.65	7597.21	0	0	4331.47	0	3914.88	3982.04	7797.99	7365.29	7912.22	7060.17	7770.48	10305.4	13017.2	8944.68	13263.6	12679	9452.56	13121.8
ACSL1	Non-matrisome	Non-matrisome	GO:CC not extracellular matrix	A0A287AIP7	A0A287AIP7	A0A287AIP7_PIG	0	46035.2	40746.7	35483.6	28103.9	47149.6	24861.9	6302.42	13328	7336.77	7493.59	22291.4	19590	0	72569.6	31277.4	28211.3	45437.7	58145.4	40400.4	24551.6	28799.2	43202.1	27570.6	45318.9	11513.6	18294.5	9213.57	16830.6	10172.4	23265	60079.6	53991	57082.4	37858.8	59670.3	54506.9	71462.7	58825.3	67563.1	97234.7	58703.2	62700.4
ACSL3	Non-matrisome	Non-matrisome	GO:CC not extracellular matrix	A0A4X1UAY0	A0A4X1UAY0	A0A4X1UAY0_PIG	0	3047.94	2978.79	2485.84	2167.3	2303.12	2264.26	0	0	0	2995.13	0	2920.48	0	2299.61	0	1216.1	2784.13	3188.59	0	4026.63	1851.4	2210.66	1418.24	2242.11	0	0	0	0	2213.68	0	2126.91	2736.95	2996.29	2594.88	2625.84	2783.7	4421.1	2959.81	3395.22	5180.82	2809.68	4487.24
ACSL5	Non-matrisome	Non-matrisome	GO:CC not extracellular matrix	F1S5J8	F1S5J8	F1S5J8_PIG	0	1508.69	0	0	2152.45	772.765	0	0	0	1850.83	0	0	0	0	1096.74	0	0	0	0	0	0	0	0	0	0	0	0	0	0	3599.73	0	8028.13	646.984	0	0	730.957	0	0	0	0	0	0	0
ACSM3	Non-matrisome	Non-matrisome	GO:CC not extracellular matrix	F1RPB1	F1RPB1	F1RPB1_PIG	0	987.096	1922.81	1571.2	0	2283.08	0	0	0	0	0	0	0	0	1068.92	0	1092.46	2613.94	1472.16	1707.47	1755.84	1730.57	2009.56	1778.5	1828.76	0	0	0	0	0	0	3343.58	2405.95	2955.51	2215.8	1442.06	3066.24	2509.59	2135.69	0	5162.15	2137.89	1250.93
ACSM5	Non-matrisome	Non-matrisome	GO:CC not extracellular matrix	I3L882	I3L882	I3L882_PIG	0	0	4304.96	4329.5	0	5465.55	0	0	0	0	0	0	0	0	2371.71	0	4927.62	7973.4	3840.81	1389.5	0	2393.04	1435.94	4360.03	3036.9	0	0	0	0	0	0	0	2337.12	2294.11	2700.8	2650.98	4730.53	0	2064.82	0	3457.43	2334.68	1867.52
ACSS1	Non-matrisome	Non-matrisome	GO:CC not extracellular matrix	A0A287AT39	A0A287AT39	A0A287AT39_PIG	0	3525.41	9321.67	6612.49	7365.29	9230.34	8623.32	3885.37	3110.01	4510.24	0	5887.69	3474.32	0	11241.4	0	11723.5	10472.2	14144.8	4303.84	3065.99	7658.55	7677.17	5355.4	10576.8	4683.35	0	0	0	4902.47	0	8870.09	7462.2	12579.8	9927.73	9951.85	7976.41	18674.9	16817.7	12511.7	22346.2	15390.7	32530.4
ACSS2	Non-matrisome	Non-matrisome	GO:CC not extracellular matrix	F1S4Y0	F1S4Y0	F1S4Y0_PIG	0	3679.22	992.318	7310.1	2661.67	4071.24	5442.06	4730.08	0	3266.38	5504.61	5989.04	5141.48	0	1566.7	0	2711.57	3507.75	2633.97	5281.33	5810.27	3066.21	5831.07	2783.35	4215.97	7049.6	4463.5	8363.71	8928.26	2779.59	8820.72	7932.45	5888.12	7751.02	4338.73	6812.2	7559.14	8333.59	4291.23	6888.16	7687.61	6945.24	7417.89
ACSS3	Non-matrisome	Non-matrisome	GO:CC not extracellular matrix	A0A287B4R8	A0A287B4R8	A0A287B4R8_PIG	0	4820.37	0	3827.99	4001.84	3559.91	0	0	0	0	3132.17	0	0	0	4287.89	0	4107.56	4116.24	3879.7	3915.15	0	2721.82	2725.43	3743.81	2512.94	0	0	0	0	4082.87	0	2947.42	3599.28	4159.46	3832.11	4648.84	2810.12	5534.21	4315.51	0	6082.87	4686.63	5349.45
ACTA1	Non-matrisome	Non-matrisome	GO:CC not extracellular matrix	P68137	P68137	ACTS_PIG	0	4247420	5555990	5934740	2691240	4041290	4534120	1918510	2331350	1629400	2430930	4100710	2542410	604033000	2518890	4231560	3889080	4805800	4448730	6198570	7015160	5151300	4452100	5429350	4553620	1890400	2323000	1490590	7598210	1374070	3888010	5422730	4311220	4969290	5830090	4461740	6014550	3995210	4133060	5576380	3264700	4248960	5811720
ACTB	Non-matrisome	Non-matrisome	GO:CC not extracellular matrix	Q6QAQ1	I3LVD5;Q6QAQ1	ACTB_PIG	0	409677	313613	387037	663488	268205	1032110	970778	921235	1737410	1408910	817751	776991	0	269693	51697.3	310221	167483	188367	547776	343113	237710	201306	248321	334719	1380320	1235870	1673540	1243440	1899710	1358230	171576	193947	244965	238692	274606	272550	324353	200004	178689	301527	265433	268861
ACTBL2	Non-matrisome	Non-matrisome	GO:CC not extracellular matrix	A0A287A4R1	A0A287ANW0;I3LVD5;Q6QAQ1;A0A4X1W7T1;B6VNT8;A0A287A4R1	A0A287A4R1_PIG	0	78573.1	65877	111029	100921	82494.2	239211	420491	225617	457035	582478	294602	117034	0	101108	13675.7	0	99517.2	79337.8	0	101094	104194	99767.9	71128.2	65579	352596	444670	588122	249742	474416	298098	77015.8	73015.2	97120	83623.5	111500	112253	40076.1	44054.9	44333	39696.6	61903.7	44180.1
ACTG2	Non-matrisome	Non-matrisome	GO:CC not extracellular matrix	A0A4X1W7T1	A0A4X1W7T1	A0A4X1W7T1_PIG	0	25617.1	4592.09	16622	10584.9	8985.99	23737.6	13504.5	9983.69	21586	39864.3	19539.5	11910.1	0	10779.8	0	5779.03	4869.03	11307.9	9009.82	21238.7	11577.5	5396.36	9533.03	10527	21836	18399	18698.3	30731	8969.03	15392.5	7238.51	27228.1	7610.06	0	13502.2	9159.21	5613.28	8741.71	6189.38	5720.08	17985.4	6861.97
ACTL6A	Non-matrisome	Non-matrisome	GO:CC not extracellular matrix	F1SGC8	F1SGC8	F1SGC8_PIG	0	3040.96	1287.25	3892.6	3768.23	3288.97	5249.03	2925.34	5303.13	6987.87	7094.38	9934.97	5232.59	0	1606.29	0	2816.19	2863.12	2184.77	1231.4	3229.54	886.456	707.941	1486.95	0	0	0	2417.15	0	3277.09	0	0	1047.53	0	953.891	1611.21	0	0	0	0	0	967.3	0
ACTMAP	Non-matrisome	Non-matrisome	GO:CC not extracellular matrix	A0A286ZWY2	A0A286ZWY2	A0A286ZWY2_PIG	0	0	0	0	0	146599	1155380	1233720	0	1475420	0	1194930	0	0	35932.4	0	136985	0	148529	697472	0	0	203044	237001	0	0	0	0	3268700	578690	0	0	0	0	0	0	0	0	0	2300220	0	0	0
ACTN1	Non-matrisome	Non-matrisome	GO:CC extracellular matrix (GO:0005576, GO:0005578 & GO:0031012) & GO:CC not extracellular matrix	I3LLY3	I3LLY3	I3LLY3_PIG	0	25570.3	15995.9	30238.7	32540.2	20911.1	43887.2	43241.4	29004.4	56856.9	73170.6	60646.1	36571.3	0	14353	19863.9	12080.3	15429.8	16261.3	10235	15848.4	2740.22	4744.01	9166.71	4035.79	38219.2	35330.5	37289.9	28369.1	33854	26793.5	10137.7	7461.91	10781.6	7587.22	14137.4	5832.14	16969.9	9197.64	17997.7	12745.2	7543.76	31021.6
ACTN2	Non-matrisome	Non-matrisome	GO:CC extracellular matrix (GO:0005576, GO:0005578 & GO:0031012) & GO:CC not extracellular matrix	F1RHL9	F1RHL9	F1RHL9_PIG	0	3872930	2602130	3264370	1056750	2982880	1102470	108923	454946	98917.3	107861	824098	526881	212767000	2043160	881328	1754290	2229160	3197880	2399770	1219630	1708910	1203920	2914940	1337150	142573	302167	92786.4	885796	270020	606042	2988520	2700110	3013620	1756880	3679350	1224810	2711720	2847370	2822350	2966010	1994300	2787180
ACTN3	Non-matrisome	Non-matrisome	GO:CC not extracellular matrix	A0A5G2QU26	A0A5G2QU26	A0A5G2QU26_PIG	0	2023190	1467200	1992550	366800	995736	362007	33470.2	167472	33002.4	27380.9	341640	199499	113637000	1295950	290356	805396	794833	1187480	752187	539414	309765	340043	1381520	280452	44041.1	74950.8	25175.3	329741	76099.5	195991	1213410	1333110	1392060	257595	1049670	372564	646747	926156	754414	629380	460050	401426
ACTN4	Non-matrisome	Non-matrisome	GO:CC extracellular matrix (GO:0005576, GO:0005578 & GO:0031012) & GO:CC not extracellular matrix	A0A287A4Q7	A0A287A4Q7	A0A287A4Q7_PIG	0	238686	203341	297981	309442	185390	350895	600833	360490	611491	747048	446880	321579	0	125771	323750	159501	144654	163550	96094.5	112101	28533.5	32553.7	67704.2	33088.1	270726	268450	315773	210092	206083	172984	87197.3	56524.8	73729.4	60556	110939	45138.3	97750.9	65570.6	122669	103046	49357.4	81713
ACTR10	Non-matrisome	Non-matrisome	GO:CC extracellular matrix (GO:0005576, GO:0005578 & GO:0031012) & GO:CC not extracellular matrix	I3LHK5	I3LHK5	ARP10_PIG	0	3154.44	1423.56	1981.53	2984.68	1618.27	3326.4	3282.73	3697.03	3607.6	5100.02	0	2069.55	0	1676.93	0	1598.37	1121.52	1506.09	2172.69	0	870.916	1467.49	1572.29	1816.68	4909.48	0	6623.16	0	3274.02	3837.3	2066.53	1837.36	2868.27	1713.65	2004.75	1795.48	2716.98	2378.66	2678.06	2502.14	1943.86	2792.34
ACTR1A	Non-matrisome	Non-matrisome	GO:CC not extracellular matrix	F2Z5G5	F2Z5G5	ACTZ_PIG	0	15356.7	8156.24	16534.6	18926.9	10173.9	28789.7	24351.9	23752.8	41510.4	25989.5	32080.3	23126.6	0	7065.38	0	11147.2	7937.26	11256.6	18412.1	21797.4	14409.5	14330.2	16817.6	17245.4	42734.3	33516	50596.3	19448	28396	34596.9	13261.6	13737.5	12423.3	16627.1	15299	16820.9	12203	13735	19333.5	11811.5	14637.7	15809
ACTR1B	Non-matrisome	Non-matrisome	GO:CC extracellular matrix (GO:0005576, GO:0005578 & GO:0031012) & GO:CC not extracellular matrix	A0A5G2QNY6	A0A5G2QNY6	A0A5G2QNY6_PIG	0	11343.3	9020.27	9420.84	15239.2	7973.23	19584.3	22100	16533.9	14881.7	18694.8	55653	15767.7	0	6837.14	0	7540.48	6718.98	6895.62	10597.9	8729.32	7714.81	10323.9	9168.96	7717.07	10385.1	16216.5	15476.7	14451.5	10444.4	9374.89	10529.7	7997.3	8555.22	10370	10471.4	7448.14	5321.63	4497.33	7447.11	3999.31	8235.62	5290.02
ACTR2	Non-matrisome	Non-matrisome	GO:CC extracellular matrix (GO:0005576, GO:0005578 & GO:0031012) & GO:CC not extracellular matrix	A0A5G2RE71	A0A5G2RE71	A0A5G2RE71_PIG	0	17513.3	14306.4	16129	32664.4	14377.8	37023.3	37895.9	39267.4	65890.3	50525.6	39652.6	35018.8	0	9195.56	30768.7	16385.9	11720.4	11333.2	13307	8796.42	6387.4	5809.05	9523.87	7990.2	42674.4	29586.5	36799.1	31142.9	40748.6	20350.5	5388.31	7202.62	7364	7688.85	11440.6	7249.41	8702.02	7922.52	6987.31	8564.67	10309.5	9900.08
ACTR3	Non-matrisome	Non-matrisome	GO:CC not extracellular matrix	A0A286ZIH7	A0A286ZIH7	A0A286ZIH7_PIG	0	35044.5	29657.1	34414.5	75118.2	31521.8	80720.4	115447	84418.1	161498	144857	80645.1	70052.4	0	20408.4	0	31075.9	24144.4	27020.9	24371.9	31753.5	16669	12706.3	19592	13236.8	76392.7	88791.4	100885	77386.2	111968	60123.2	13442.3	15241.9	18509	17329.9	24062	13729.4	20364.5	14349.8	19923.1	15674	21564.3	20526.3
ACY1	Non-matrisome	Non-matrisome	GO:CC not extracellular matrix	P37111	P37111	ACY1_PIG	0	21390.3	29013.7	27859.1	29247.8	34174.8	16522.3	13047.2	11105.8	14527.2	10185.4	27563.7	11505.2	5211380	32482.1	47520.9	56157.3	26219.2	30480.2	5855.52	0	2676.48	5081.03	12583.2	3146.81	0	0	4468.89	0	6258.23	3065.89	3612.51	6584.91	4601.06	3670.44	9663.9	1894.17	13005.4	14177.9	19536.3	11938.9	16691.1	14479.1
ACYP1	Non-matrisome	Non-matrisome	GO:CC not extracellular matrix	P24540	P24540;A0A8D0Z570	ACYP1_PIG	0	1639.72	3408.71	2737.13	3359.37	2774.2	3324.88	2002.8	0	0	0	0	0	0	4585.6	0	5286.61	2403.96	2844.55	0	0	0	502.883	1573.6	0	0	0	0	0	0	0	0	0	0	0	1450.15	0	0	989.488	0	1278.24	0	0
ACYP2	Non-matrisome	Non-matrisome	GO:CC not extracellular matrix	P00819	A0A4X1W6M0;P00819	ACYP2_PIG	0	21071.6	22259.5	26816	27911.9	28794	27465.2	4151.76	5075.32	5940.77	0	9814.57	8776.43	1190630	30531.6	4591.15	41642.7	26618.6	25358.1	10658.4	8912.1	14538	10282.4	34415.9	27285.8	0	0	0	0	1909.59	5140.66	21000	25868.7	13323.4	17350.5	26349.7	23609.3	3697.44	7354.02	7729.74	5922.59	6725.69	9271.27
ADA	Non-matrisome	Non-matrisome	GO:CC not extracellular matrix	A0A8W4FP59	A0A8W4FP59	A0A8W4FP59_PIG	0	1508.28	2970.73	3487.62	3340.61	2328.56	4210.93	0	3056.76	4119.93	5207.77	0	4267	0	2177.62	0	3378.41	3148.96	3290.92	0	0	0	0	0	0	0	0	0	0	2283.03	0	0	0	0	0	0	0	0	0	0	0	0	0
ADAM10	Matrisome-associated	ECM Regulators	GO:CC not extracellular matrix	O77633	O77633	ADA10_PIG	0	500.804	0	0	1240.35	667.378	0	0	0	0	2188.72	0	0	0	972.98	0	948.735	0	0	1010.5	0	0	1025.3	0	0	0	0	0	0	0	0	0	0	0	0	322.327	0	1128.41	0	0	0	0	0
ADAM15	Matrisome-associated	ECM Regulators	GO:CC not extracellular matrix	I3LQN5	I3LQN5	I3LQN5_PIG	0	0	0	1528.57	0	582.81	1493.87	0	0	1827.15	0	0	1383.51	0	0	0	0	532.282	0	0	0	0	0	0	0	0	0	0	0	0	0	0	527.555	520.089	0	0	575.856	0	0	0	0	424.208	0
ADAM17	Matrisome-associated	ECM Regulators	GO:CC not extracellular matrix	O77636	O77636	ADA17_PIG	0	0	0	803.154	749.207	0	2281.01	0	0	0	0	0	1634.6	0	523.167	0	845.71	0	0	1963.14	0	0	0	594.884	0	0	0	0	0	1232.02	0	0	1631.87	971.762	0	280.328	947.73	0	0	0	0	0	0
ADAM33	Matrisome-associated	ECM Regulators	GO:CC not extracellular matrix	A0A287ASR6	A0A287ASR6	A0A287ASR6_PIG	0	0	0	0	0	0	1349.39	1383.74	0	0	1089.38	0	0	0	0	0	0	0	0	0	0	0	0	0	0	4433.34	0	0	0	1666.36	2037.97	0	0	0	0	0	0	0	0	0	0	0	0
ADAMTSL1	Matrisome-associated	ECM Regulators	GO:CC extracellular matrix (GO:0005576, GO:0005578 & GO:0031012) & GO:CC not extracellular matrix	A0A287AB44	A0A287AB44	A0A287AB44_PIG	0	0	0	0	1811.83	0	6528.09	27869.9	19868.5	24202	37310.4	0	29065.5	0	0	0	0	0	0	3325.52	4730.38	0	0	0	0	3787.77	39312.3	0	0	0	0	0	0	3792.27	503.85	0	0	1816.05	776.525	4966.78	4190.47	1170.93	0
ADAMTSL3	Matrisome-associated	ECM Regulators	GO:CC extracellular matrix (GO:0005576, GO:0005578 & GO:0031012) & GO:CC not extracellular matrix	A0A287AVV9	A0A287AVV9	A0A287AVV9_PIG	0	922.503	0	0	1011.87	0	1403.04	0	2352.27	1671.64	6294.75	3366.38	2514.76	0	0	0	0	0	0	1302.14	0	0	0	0	0	0	7869.85	0	0	1482.11	0	0	0	0	0	0	0	0	0	0	0	0	0
ADAMTSL4	Matrisome-associated	ECM Regulators	GO:CC extracellular matrix (GO:0005576, GO:0005578 & GO:0031012) & GO:CC not extracellular matrix	A0A287ANN1	A0A287ANN1	A0A287ANN1_PIG	0	1876.17	2590.82	0	3358.74	0	2957.12	4593.12	4458.5	5608.99	8377.33	0	5860.34	0	0	0	1395.72	0	0	4011.94	0	0	0	0	0	8918.9	6812.16	6547.76	9061.86	5218.74	4243.31	0	0	0	0	0	0	0	0	0	0	0	0
ADAR	Non-matrisome	Non-matrisome	GO:CC not extracellular matrix	A0A5G2QXI1	A0A5G2QXI1	A0A5G2QXI1_PIG	0	864.613	0	0	0	0	0	2091.68	2128.24	1313.11	0	0	0	0	0	0	0	0	0	0	0	0	0	0	0	0	0	0	0	2606.26	0	0	0	0	0	0	0	0	0	0	0	0	0
ADCK5	Non-matrisome	Non-matrisome	GO:CC not extracellular matrix	F1RSN7	F1RSN7	F1RSN7_PIG	0	0	0	0	0	0	0	0	0	0	0	0	0	0	0	0	0	0	0	0	0	0	0	0	0	0	0	0	0	0	0	0	407.029	1015.61	0	0	0	0	896.053	0	2236.59	853.446	0
ADCY2	Non-matrisome	Non-matrisome	GO:CC not extracellular matrix	F1S0T0	F1S0T0	F1S0T0_PIG	0	0	0	564.872	0	0	0	0	0	0	0	0	0	0	0	0	591.579	966.573	0	0	0	0	0	0	0	0	0	0	0	0	0	770.628	1248.31	1051	1220.61	745.712	845.772	1431.69	1830.78	0	1972.57	1560.22	1781.77
ADCY3	Non-matrisome	Non-matrisome	GO:CC not extracellular matrix	A0A287BPU6	A0A287BPU6	A0A287BPU6_PIG	0	0	0	0	832.573	0	1297.74	0	1834.71	1538.24	2932.33	0	1630.67	0	0	0	0	0	0	1540.92	1553.84	0	0	0	0	5590.14	0	8368.09	3029.87	3147.98	0	0	0	361.972	0	0	0	0	0	0	0	0	0
ADCY9	Non-matrisome	Non-matrisome	GO:CC not extracellular matrix	A0A287B2U1	A0A287B2U1	A0A287B2U1_PIG	0	0	0	0	0	0	0	0	0	0	0	0	0	0	0	0	0	0	0	0	967.526	0	1047.88	0	1261.29	0	0	0	0	0	0	0	952.87	1268.53	0	1174.87	1293.9	758.815	1522.5	0	1944.52	0	1962.76
ADD1	Non-matrisome	Non-matrisome	GO:CC extracellular matrix (GO:0005576, GO:0005578 & GO:0031012) & GO:CC not extracellular matrix	A0A286ZR45	A0A286ZR45	A0A286ZR45_PIG	0	7423.69	8707.36	8670.48	16369	6901.37	25290.2	39107.5	21981.7	40945.4	31627.9	35018.2	28037.9	0	2594.96	0	8551.37	3225.28	4291.85	4763.51	16055.3	3395.11	2619.97	5048.25	3423.78	26703.1	24665.6	47914.2	33373.4	15609.1	22170.6	3248.86	3806.9	4704.38	5511.55	4271.37	3420.46	0	2469.07	2707.83	5954.26	4062.51	2340.42
ADD3	Non-matrisome	Non-matrisome	GO:CC not extracellular matrix	A0A4X1TEQ8	A0A4X1TEQ8	A0A4X1TEQ8_PIG	0	7511.81	4961.73	5808.94	11923.7	4214.18	11189	19485.6	15568.2	23088.6	19950	13777.2	14330.5	0	3436.99	11373.6	5506.56	2097.47	4051.55	5012.86	3247.44	2638.3	2229.48	3210.51	3144.3	9591.56	14107	14565	7883	10295.4	10514.5	2099.98	1989.9	2203.78	2708.34	2889.43	4416.74	1478.14	2010.95	0	3751.34	1911.08	0
ADGRA2	Non-matrisome	Non-matrisome	GO:CC not extracellular matrix	A0A5G2QS30	A0A5G2QS30	A0A5G2QS30_PIG	0	2583.81	0	0	2050.1	0	5739.92	18790.3	6866.7	10811.6	13714.1	0	4375	0	0	0	0	0	0	1113.24	0	0	0	0	0	6655.9	10960.1	14959.8	12493	4077.38	10977	0	0	0	0	0	0	0	0	0	0	0	0
ADGRE5	Non-matrisome	Non-matrisome	GO:CC not extracellular matrix	K7GMF6	K7GMF6	K7GMF6_PIG	0	3961.06	6578.39	8604.75	7872.96	5407.26	23647.7	15015.3	12929.9	10605.3	14147.8	25056.8	17902.4	0	1643.1	0	2499.62	7296.81	4242.18	8781.27	11460.8	2757.87	3220.01	6889.56	6497.27	32626	16455.9	19768.9	13949	25946.7	18951.9	3556.88	5248.19	2746.16	2851.21	5164.24	6553.84	2014.12	1415.91	2359.64	1905.1	1251.41	1946.97
ADGRF5	Non-matrisome	Non-matrisome	GO:CC not extracellular matrix	A0A8W4FD62	A0A8W4FD62	A0A8W4FD62_PIG	0	0	0	0	0	990.48	0	0	0	0	0	0	0	0	1097.73	0	0	1242.32	0	0	0	1565.37	0	1782.59	1389.67	0	0	0	0	0	0	0	1333.46	0	1144.04	857.69	1632.92	0	0	0	0	0	0
ADGRG1	Non-matrisome	Non-matrisome	GO:CC not extracellular matrix	A0A287BI22	A0A287BI22	A0A287BI22_PIG	0	0	0	0	0	0	1226.6	0	0	0	0	0	0	0	251.63	0	0	0	0	0	818.655	0	455.874	0	472.737	0	0	0	0	0	0	0	0	0	0	1015.28	482.191	0	0	0	0	0	0
ADGRL2	Non-matrisome	Non-matrisome	GO:CC not extracellular matrix	A0A8D1NTY0	A0A8D1NTY0	A0A8D1NTY0_PIG	0	1509.92	0	0	3961.1	2306.43	3884.41	4102.43	4064.6	9639.51	5126.79	6868.52	2360.9	0	974.605	0	1095.23	2866.59	0	3821.14	2742.83	1040.02	1112.18	1778.91	1505.43	5309.53	5592.59	11578.7	5858.45	2976.08	6409.58	0	1454.91	1801.12	1674.63	881.306	1715.36	0	0	0	0	0	0
ADH1C	Non-matrisome	Non-matrisome	GO:CC not extracellular matrix	A0A287A703	A0A287A703	A0A287A703_PIG	0	12294.5	9838.93	22411.2	37696.9	6332.88	149548	62839.4	42317.4	58033.1	106857	73453.8	175102	0	3174.77	15703.3	6273.15	4942.38	10553.1	14567.5	21709.8	7082.24	30054.8	6848.2	19227.2	177663	29524.8	401478	69457.7	90094.7	120308	17572.7	3995.77	34910.5	19631.7	2486.16	30627.8	3898.21	971.604	4374.8	7069.75	9200.51	5369.65
ADH4	Non-matrisome	Non-matrisome	GO:CC not extracellular matrix	F1S0Y8	F1S0Y8	F1S0Y8_PIG	0	0	0	0	2134.72	0	4908.14	0	0	2062.33	3144.71	5896.06	5688.94	0	0	0	0	0	0	0	0	0	1450.1	0	0	0	4722.27	25802.4	0	9311.1	18705.9	0	0	1906.68	0	0	1194.42	0	0	0	0	0	0
ADH5	Non-matrisome	Non-matrisome	GO:CC not extracellular matrix	A0A287AZV4	A0A287AZV4	A0A287AZV4_PIG	0	3816.12	4338.87	5462.48	6089.92	6799.92	5738.44	2512.85	5432.38	6611.6	1689.99	4970.71	2775.15	0	8508.5	0	9585.78	7530.21	5774.87	1299.13	1657.2	1047.61	977.607	2572.15	1165.12	0	0	4485.33	0	1204.34	0	0	1554.19	1538.83	1562.86	2918.5	1253.15	0	2723.06	0	1486.55	1798.16	2214.58
ADHFE1	Non-matrisome	Non-matrisome	GO:CC not extracellular matrix	F1RTZ1	F1RTZ1	F1RTZ1_PIG	0	5286.35	5609.95	7008.9	6070.43	8457.48	7470.73	2467.74	2346.38	0	0	3357.84	3206.51	0	8038.35	0	9353.32	7367.53	8823.44	4132.61	3357.99	3280.44	4322.53	5100.76	3721.83	0	0	0	0	1916.08	0	5279.26	3820.36	3275.4	3670.47	4955.01	6515.98	0	2709.02	0	3522.5	3483.23	0
ADI1	Non-matrisome	Non-matrisome	GO:CC not extracellular matrix	I3LEI8	I3LEI8	I3LEI8_PIG	0	5366.76	6607.55	6818.6	5715.15	7829.38	8423.49	3368.56	4715.09	3312.68	4384.68	11302.9	3407.14	0	6740.35	10017.2	8974.36	7243.53	7981.22	2431.95	0	0	926.687	2547.59	698.673	0	0	0	0	1327.61	0	0	1667.14	662.528	0	1303.73	0	0	1701.58	0	0	1627.8	2356.08
ADIPOQ	Core matrisome	ECM Glycoproteins	GO:CC extracellular matrix (GO:0005576, GO:0005578 & GO:0031012) & GO:CC not extracellular matrix	Q6PP07	Q6PP07	Q6PP07_PIG	0	34414.5	40093.9	52835.9	64041.6	32407.8	60730.9	46880	54985.5	60869	47450.3	49608.5	59100.8	0	25713.7	20494.7	60950.4	35660.1	37033.5	23056.9	20770.9	4394	4364.59	17063.4	5815.23	39813.1	43706.2	39431.8	28846.9	40669.1	38477.7	5737.13	10533.2	10669	8242.62	14182.1	4750.8	14400.8	10389.6	16437.1	12597.3	0	9779.23
ADIRF	Non-matrisome	Non-matrisome	GO:CC not extracellular matrix	A0A287ACN2	A0A287ACN2	A0A287ACN2_PIG	0	1726.85	0	2134.64	3015.75	1715.27	0	1854.61	0	0	0	0	3790.36	0	2643.42	0	3518.13	2373.1	2470.04	0	0	0	0	0	0	0	0	0	0	0	0	0	0	0	0	0	0	0	0	0	0	0	0
ADISSP	Non-matrisome	Non-matrisome	GO:CC not extracellular matrix	A0A4X1V4F3	A0A4X1V4F3	A0A4X1V4F3_PIG	0	0	0	2933.45	1733.69	1229.32	0	0	0	0	0	0	0	0	2038.46	0	0	1938.92	1667	0	0	0	638.394	890.622	0	0	0	0	0	0	0	0	0	0	0	1140.18	0	0	1089.81	0	0	1112.39	0
ADK	Non-matrisome	Non-matrisome	GO:CC not extracellular matrix	A0A5G2R0F5	A0A5G2R0F5	A0A5G2R0F5_PIG	0	1746.96	3042.49	2063.21	4980.64	5569	7290.65	5195.53	4256.32	2726.14	7916.68	23002.5	6909.12	0	3040.3	0	6764.61	4927.96	4129.49	831.221	2136.96	0	1318.34	1531.35	485.146	5922.36	5323.14	9037.81	6606.1	2377.84	3282.7	1355.46	1095.28	1300.04	930.725	1019.41	413.72	0	954.372	0	1155.06	1382.95	2881.45
ADNP	Non-matrisome	Non-matrisome	GO:CC not extracellular matrix	A5GHK7	A5GHK7	A5GHK7_PIG	0	0	0	0	0	0	0	3566.68	0	1624.3	1956.75	0	0	0	0	0	0	0	0	0	0	402.785	409.382	0	0	0	0	0	0	735.279	0	0	0	0	0	279.394	0	0	0	0	0	411.735	0
ADO	Non-matrisome	Non-matrisome	GO:CC not extracellular matrix	F1RFB8	F1RFB8	F1RFB8_PIG	0	1809.4	1639.13	0	1519.25	0	0	0	0	0	0	0	0	0	1626.09	0	2512.12	0	1060.76	0	0	0	0	0	0	0	0	0	0	0	0	0	0	0	0	811.03	0	0	0	0	0	1345.29	0
ADPGK	Non-matrisome	Non-matrisome	GO:CC extracellular matrix (GO:0005576, GO:0005578 & GO:0031012) & GO:CC not extracellular matrix	A0A5G2QK01	A0A5G2QK01	A0A5G2QK01_PIG	0	2174	1832.87	2219	2300.05	2035.04	2765.02	2480.09	3294.45	2399.24	5036.46	4467.63	3128.95	0	1419.77	0	2223.57	2027.42	1899.83	1638.4	2969.63	0	755.11	1072.9	487.114	3963.33	0	1768.95	0	2704.63	0	1155.15	1335.55	2311.69	1392.72	1169.71	1524.31	0	989.633	0	1634.51	1053.78	0
ADPRHL1	Non-matrisome	Non-matrisome	GO:CC not extracellular matrix	A0A8W4FD57	A0A8W4FD57	A0A8W4FD57_PIG	0	7242.3	9245.54	7769.86	5043.8	6266.6	8264.58	0	2859.1	0	0	0	0	0	4258.97	0	4210.97	5089.92	4739.7	6007.55	16695.8	8909.68	8119.75	8031.96	8080.2	0	0	0	15996	0	0	5892.34	7497.56	6339.11	9903.14	5494.15	6310.13	11142.7	5436.08	9440.36	6510.38	8702.38	11736.8
ADPRS	Non-matrisome	Non-matrisome	GO:CC not extracellular matrix	F1SV59	F1SV59	F1SV59_PIG	0	2517.32	2982.71	2115.5	2897.1	3305.31	0	2292.85	2051.54	0	3271.78	0	0	0	3009.21	4738.3	3951.82	2306.55	2500.71	0	0	0	915.677	0	0	0	0	0	0	0	0	0	1658.53	0	0	2161.15	0	0	1271.89	0	0	0	0
ADRM1	Non-matrisome	Non-matrisome	GO:CC not extracellular matrix	A0A8W4F8D7	A0A8W4F8D7	A0A8W4F8D7_PIG	0	6666.57	8057.54	6511.35	7636.02	6070.53	11863.7	3837.25	10009	10216	6918.62	4880.24	7830.06	0	2225.78	0	5526.13	6100.49	3732.01	7492.23	7765.83	10438.6	6895.93	9808.96	11172.6	0	5424.52	10605.8	0	17230	5636.57	4923.82	6498.84	5417.2	10385.8	6525.13	6101.89	4894.57	3930.1	3234.55	4026.64	5369.77	5205.59
ADSL	Non-matrisome	Non-matrisome	GO:CC not extracellular matrix	A0A8W4F877	A0A8W4F877	A0A8W4F877_PIG	0	4049.45	9473.34	8427.7	6850.56	7106.91	4525.8	3929.73	2462.24	0	0	5132.24	0	0	7279.01	6841.29	9731.08	8771.47	9794.59	3259.54	0	0	2338.93	4806.75	3210.12	0	0	0	0	2348.9	3728.34	1410.47	2838.28	3723.59	2005.62	3193.17	2766.57	5275.13	4678.45	8233.67	7816.11	4715.55	6297.45
ADSS1^	Non-matrisome	Non-matrisome	GO:CC not extracellular matrix	A4Z6H0	A0A287BAF3;A0A287BAM7;A4Z6H1;A4Z6H0	PURA1_PIG	0	55806.1	69307.7	66803.8	67970.4	73492.1	45805.8	19931.1	25878.4	9940.71	7377.41	19085.9	14524.5	23450900	102394	93995.3	126106	64729.6	70757.5	30552.1	32007.7	37571.7	102410	86564.9	74836.6	12688.5	16481.3	8792.47	17992.6	20463.2	18526.4	33043.7	48330.9	37601.2	59988.6	57803.5	47710.1	63985.4	81675	56490.7	61894.6	88839.4	70237.7
ADSS1°	Non-matrisome	Non-matrisome	GO:CC not extracellular matrix	A0A287BAF3	A0A287BAF3	A0A287BAF3_PIG	0	21602.7	0	0	0	0	0	0	3114.82	0	0	0	0	0	36228.6	0	0	6606.95	10196.9	0	0	3919.8	4448.29	0	4291.88	0	0	0	0	0	0	8415.17	1808.36	1732.06	0	27184.8	0	0	0	0	18277.7	7240.88	2429.93
ADSS2	Non-matrisome	Non-matrisome	GO:CC not extracellular matrix	A4Z6H1	A0A287BAM7;A4Z6H1	PURA2_PIG	0	0	0	1280.87	3014.29	1053.7	3710.11	0	3635.65	1494.49	2694.97	5290.95	4395.32	0	1297.2	0	2595.76	939.882	0	0	2905.88	1873.34	2388.46	1891.61	905.21	7681.22	0	5447.26	2649.29	8097.52	2814.4	2437.63	0	1597.04	2903.3	2353.69	1303.53	2752.21	2009.84	0	2057.43	2152.46	2228.69
AEBP1	Core matrisome	ECM Glycoproteins	GO:CC extracellular matrix (GO:0005576, GO:0005578 & GO:0031012) & GO:CC not extracellular matrix	F1SSF7	F1SSF7	F1SSF7_PIG	0	7806.48	4419.1	5798.32	18816.1	4496.17	32356	30791.5	42228.9	55583.8	42450.6	40835.1	35647	0	2094.01	0	3477.81	0	2098.79	6573.65	8936.84	3043.58	2295.62	1729.37	1813.99	24958	30617.2	31970.1	22376.8	22716.8	30939.1	0	910.257	942.384	3662.91	2213.82	0	0	0	0	0	1641.29	0
AFDN	Non-matrisome	Non-matrisome	GO:CC not extracellular matrix	A0A286ZM64	A0A286ZM64	A0A286ZM64_PIG	0	0	0	1206.71	0	1261.24	0	0	0	0	0	0	0	0	1294.16	0	1253.11	859.193	723.731	0	0	0	0	0	0	1917.71	0	13515.3	0	1263.5	0	0	0	758.198	0	0	526.051	0	302.203	0	0	506.477	0
AFG1L	Non-matrisome	Non-matrisome	GO:CC not extracellular matrix	A0A4X1VC93	A0A4X1VC93	A0A4X1VC93_PIG	0	0	0	1323.82	0	658.609	0	0	0	0	0	0	0	0	617.466	0	0	994.43	1288.66	1428.23	1634.7	1998.74	1920.01	832.245	1462.85	0	0	0	0	726.701	0	2489.91	1177.7	1866.45	2304.66	1377.53	2360.43	4098.65	1967.25	4400.21	4380.61	1603.16	3299.56
AFG2A	Non-matrisome	Non-matrisome	GO:CC not extracellular matrix	F1RQN5	F1RQN5	F1RQN5_PIG	0	0	0	0	0	0	0	0	0	0	0	0	0	0	656.992	0	0	0	0	0	0	0	992.875	0	0	0	0	0	0	3042.57	0	872.173	715.851	0	0	582.519	0	0	0	0	0	0	0
AFG3L2	Non-matrisome	Non-matrisome	GO:CC not extracellular matrix	A0A8W4F7C8	A0A8W4F7C8	A0A8W4F7C8_PIG	0	15078.9	15563.3	14266.8	8477.14	15893.6	15979.8	7434.49	5384.09	6191	10675.9	13766.1	8921.33	0	10708	0	10482.8	15510.9	12174.5	12260.1	12478.2	13178.1	14560.4	12047.5	11985.2	8234.81	0	5678.9	2910.51	5658.5	12761.8	16758.1	15395.4	15520.3	12620.9	14106.5	17092.3	22157.9	22451.5	30110.8	21443.6	21365.2	20853.2
AFM	Non-matrisome	Non-matrisome	GO:CC extracellular matrix (GO:0005576, GO:0005578 & GO:0031012) & GO:CC not extracellular matrix	F1RUM1	F1RUM1	F1RUM1_PIG	0	2807.46	3293.44	2970.28	5553.63	1672.77	0	2647.32	3105.5	0	5784.52	4317.94	4056.52	0	3240.66	11606	6785.37	3659.03	3066.36	0	0	0	2283.46	0	0	0	0	0	0	0	0	0	0	0	0	951.005	0	0	0	0	0	0	0
AGBL1	Non-matrisome	Non-matrisome	GO:CC not extracellular matrix	A0A8W4F6Q4	A0A8W4F6Q4	A0A8W4F6Q4_PIG	0	0	0	0	0	817.46	0	0	0	0	0	0	0	0	1029.2	0	0	0	0	0	0	0	0	0	1061.63	0	0	0	0	0	0	0	0	0	3159.82	907.461	0	0	1155.82	0	2720.11	1789.2	2205.82
AGFG1	Non-matrisome	Non-matrisome	GO:CC not extracellular matrix	A0A287APA8	A0A287APA8	A0A287APA8_PIG	0	8438.37	10809.1	12136.5	9370.95	10597.6	10248.8	7476.04	10643.7	7295.13	13619.1	20979.5	16386.3	0	7148.23	22162.4	10837.6	11034	7970.28	5538.35	17105.2	11593.7	7496.88	8538.29	11932.4	10628.3	0	6473.55	11119.1	10488	8035.49	3931.68	4931.87	8431.03	10649.4	5470.93	9819.84	8772.92	5812	0	5808.79	7613.94	9333.27
AGFG2	Non-matrisome	Non-matrisome	GO:CC not extracellular matrix	A0A287ABA8	A0A287ABA8	A0A287ABA8_PIG	0	2434.22	3764.47	4750.74	4744.15	3813.83	7811.19	10817	11314.3	4673.11	20140.2	23918.3	14841.1	0	1347.37	0	2674.07	1991.95	0	3625.01	7223.97	3269.17	2804.72	2832.46	3480.58	33794.6	13409.8	20777.4	17561.1	16159	18134.2	2431.03	2191.77	5129.5	5214.95	2731.26	4921.46	0	1103.93	0	0	3295.52	0
AGK	Non-matrisome	Non-matrisome	GO:CC not extracellular matrix	B8XSJ0	B8XSJ0	B8XSJ0_PIG	0	1665.43	0	1923.09	1526.85	1587.46	5975.63	0	3432.86	5530.4	3669.14	0	0	0	1617.88	0	1393.35	1624.32	1543.46	2166.27	0	1642.78	1368.46	0	1421.62	0	7323.33	7166.21	0	4085.39	0	2561.33	1855.39	1923.45	1225.72	1706.87	3047.56	4751.83	4429.28	8222.94	6451.08	2776.36	5107.04
AGL	Non-matrisome	Non-matrisome	GO:CC extracellular matrix (GO:0005576, GO:0005578 & GO:0031012) & GO:CC not extracellular matrix	A0A4X1TV38	A0A4X1TV38	A0A4X1TV38_PIG	0	191726	225725	209560	133151	173286	99513.3	30890.8	48977.7	21847.4	14639.4	64810.1	26654.9	0	226209	107991	192766	186818	197736	31365.6	32304.8	7343.08	11032.8	56842.8	18512.9	11677.6	17495.7	11449.2	13362.5	12669.7	13768.9	37282.4	75007.3	68545.3	13187.3	112833	11340.3	140618	144756	110702	94028.2	132438	130878
AGO2	Non-matrisome	Non-matrisome	GO:CC extracellular matrix (GO:0005576, GO:0005578 & GO:0031012) & GO:CC not extracellular matrix	A0A287AY99	A0A8D0MTW9;A0A287AY99	A0A287AY99_PIG	0	2338.83	0	2897.53	2664.61	1767.96	4087.53	3892.08	0	3430.45	4127.54	0	4080.35	0	2262.54	0	2314.82	1481.22	1806.5	0	0	0	0	1662.47	0	0	0	4477.41	0	2443.18	0	0	1843.72	0	0	1446.92	0	3084.38	1797.95	0	0	1441.9	0
AGO3	Non-matrisome	Non-matrisome	GO:CC extracellular matrix (GO:0005576, GO:0005578 & GO:0031012) & GO:CC not extracellular matrix	A0A8D0MTW9	A0A8D0MTW9	A0A8D0MTW9_PIG	0	1096.59	1436.8	0	1211.22	1030.02	0	1726.04	1503.94	0	2079.94	0	0	0	865.738	0	1506.48	1063.56	720.601	0	2990.65	0	0	0	0	0	0	0	0	0	0	0	0	0	0	355.508	0	0	0	0	0	486.167	0
AGPAT1	Non-matrisome	Non-matrisome	GO:CC not extracellular matrix	A0A5G2QMC2	A0A5G2QMC2	A0A5G2QMC2_PIG	0	2249.92	0	7213.45	5630.32	2152.6	15588.1	6518.92	0	5690.73	6367.49	0	32011.1	0	2498.45	30775.5	0	0	0	4324.57	21041.9	0	0	4791.23	1993.13	0	14787.8	0	0	2663.88	0	0	7540.83	17414.3	0	12260.4	0	4285.7	0	0	4572.11	4678.26	0
AGPAT2	Non-matrisome	Non-matrisome	GO:CC not extracellular matrix	B3VN02	B3VN02	B3VN02_PIG	0	0	0	1731.26	0	0	0	0	1203.38	0	0	0	0	0	0	0	0	1388.48	0	0	0	0	0	0	1096.36	0	0	0	0	2232.27	0	1974.86	2114.15	1021.87	0	2165.07	0	4061.79	3565.66	5383.2	4601.63	2987.77	4362.98
AGPAT3	Non-matrisome	Non-matrisome	GO:CC not extracellular matrix	B8XTR1	B8XTR1	B8XTR1_PIG	0	926.522	0	0	0	736.53	0	0	0	0	0	0	0	0	640.22	0	0	978.117	0	2006.64	0	0	0	0	0	0	0	0	0	2593.78	0	1445.19	1040.53	1267.65	0	980.074	0	2665.03	2472.43	4641.78	4666.6	2910.1	2947.28
AGPAT5	Non-matrisome	Non-matrisome	GO:CC not extracellular matrix	B8XTR3	B8XTR3	B8XTR3_PIG	0	1249.31	0	2854.71	1326.87	1680.16	0	0	0	0	0	0	0	0	2793.42	0	1125.71	2204.02	1723.36	0	10440.1	0	1771.11	1139.79	3714.51	0	0	0	0	1866.67	0	3433.69	3508.79	3110.75	1634.03	4223.03	2143.91	3957.78	3157.02	0	3815.25	3026.83	4827.13
AGPS	Non-matrisome	Non-matrisome	GO:CC not extracellular matrix	A0A287A3U2	A0A287A3U2	A0A287A3U2_PIG	0	1679.14	3609.53	1692.31	1307.48	1706.35	2056.41	0	0	2092.89	0	0	1788.03	0	1372.51	0	1554.5	1519.43	0	2732.37	3578.23	1811.97	1477.42	1160.83	1584.1	0	0	0	0	2243.31	0	0	1729.26	2347.16	2491	1164.05	1843.61	2599.81	2511.96	0	0	1893.19	2425.17
AGRN	Core matrisome	ECM Glycoproteins	GO:CC extracellular matrix (GO:0005576, GO:0005578 & GO:0031012) & GO:CC not extracellular matrix	A0A286ZS39	A0A286ZS39	A0A286ZS39_PIG	0	20029.3	23024.1	22054.9	20164.7	22845	38474.9	43011.1	45907.2	58737.5	49601.3	45796.2	33570.9	0	9399.58	29723.1	17958	14724.5	15333.1	39128.6	31848.1	12306	10573	19804.1	14546.2	61439.3	65460.5	102130	44962	27673.4	67514.2	13877.1	12766.4	17117.3	14502.1	16567.1	14515.6	11455.9	9350.95	7301.31	8010.43	8515.12	13252.7
AGT	Matrisome-associated	ECM Regulators	GO:CC extracellular matrix (GO:0005576, GO:0005578 & GO:0031012) & GO:CC not extracellular matrix	A0A287AJ51	A0A287AJ51	A0A287AJ51_PIG	0	9255.83	16064.1	12403.1	20683.2	19710.3	25562.6	16782.4	21912.9	22321.6	23678.9	24949.2	21076.3	0	17445.3	50513.7	23673.2	17707.5	15334.4	5531.21	14435.3	2281.99	3746.39	8468.7	4953.57	13427.5	17975.2	14220	7698.16	7827.25	8209.65	5252.69	4158.91	3544.42	6585.64	6043.87	6820.68	8287.44	4868.66	5058.76	4466.31	5997.67	5128.51
AHCTF1	Non-matrisome	Non-matrisome	GO:CC not extracellular matrix	A0A5G2R3A1	A0A5G2R3A1	A0A5G2R3A1_PIG	0	0	0	0	0	0	0	0	0	0	1679.94	0	0	0	0	0	0	0	0	0	0	0	0	0	0	0	0	6260.79	6956.07	2130.67	4621.04	0	0	0	0	0	0	0	0	0	0	0	0
AHCY	Non-matrisome	Non-matrisome	GO:CC not extracellular matrix	Q710C4	A0A287B4J2;Q710C4	SAHH_PIG	0	4466.76	9490.9	9982.46	10803.3	7709.82	9593.42	7478.38	7542.6	6844.05	10463.5	9360.9	6224.74	0	7411.55	28810.8	13024.4	9451.6	8817.67	0	0	0	1190.42	3227.51	0	4567.25	6501.08	0	3758.48	2413.23	3325.07	0	1767.76	2295.33	3219.56	3118.37	0	3308.92	3675.7	5213.47	2629.74	3282.03	3402.55
AHCYL1	Non-matrisome	Non-matrisome	GO:CC not extracellular matrix	E7EI18	E7EI18	E7EI18_PIG	0	2424.37	3476.12	3835.08	3955.69	2988.14	2235.55	4245.36	3187.42	2582.42	3044.57	2951.71	1669.81	0	3138.4	1694.78	3258.36	2940.17	3299.31	1414.09	0	900.045	966.452	659.042	749.433	0	0	0	0	2798.59	0	1384.64	1350.86	1988.39	1199.92	2019.21	903.177	2381.58	1987.21	0	2642.76	1683.42	1475.48
AHCYL2	Non-matrisome	Non-matrisome	GO:CC not extracellular matrix	A0A5G2R934	A0A5G2R934	A0A5G2R934_PIG	0	0	0	0	0	1049.59	0	0	0	0	0	0	0	0	1284.48	0	737.133	1032.19	941.359	0	0	0	0	0	0	0	0	0	0	0	0	0	0	0	0	1168.51	0	0	0	0	0	0	0
AHNAK	Non-matrisome	Non-matrisome	GO:CC not extracellular matrix	A0A287A608	A0A287A608	A0A287A608_PIG	0	135218	76425.1	85735.8	168458	84729.7	99996.2	282854	157712	158827	176031	111180	153687	29231200	114143	236345	111996	68731.7	83030.4	33502.1	24282.2	3865.7	18723.8	28615.3	12357.8	43112.4	61951.1	64992.7	29348.8	51956.8	29677.6	5553.08	15574.1	8552.09	17994.4	24697.4	8291.62	9145.72	11036.3	11882.5	8685.94	5526.37	13093.4
AHNAK2	Non-matrisome	Non-matrisome	GO:CC not extracellular matrix	A0A286ZXM0	A0A286ZXM0	A0A286ZXM0_PIG	0	9022.52	6757.32	6959.48	17038.9	5270.78	10422.3	16325.7	19649.2	24735.5	17840.5	12273.9	24256.1	0	3963.57	24314.6	9706.63	2663.11	4905.5	7786.8	0	0	1838.63	1751.73	0	7500.67	8168.64	7776.52	6341.9	5464.89	6935.31	0	972.935	1868.22	1446.53	2224.26	0	0	0	0	0	0	0
AHSA1	Non-matrisome	Non-matrisome	GO:CC not extracellular matrix	A0A4X1T4G7	A0A4X1T4G7	A0A4X1T4G7_PIG	0	2385.16	4132.87	3715.13	3179.44	3441.94	16130	7602.26	10349.9	12304	6570.03	19487.2	10192.1	0	2566.78	0	3597.13	4528.02	3755.41	3585.8	12440	4624.8	4424.12	4897.56	4029.19	22094.2	22955.1	8982.91	6016.14	5492.53	8797.99	1896.24	3851.28	3342.29	5643.53	2780.22	3613.6	2923.63	3080.24	7695.4	2275.46	3003.74	3452.01
AHSA2	Non-matrisome	Non-matrisome	gene not present in GO IDs	A0A287AL79	A0A287AL79	A0A287AL79_PIG	0	0	0	0	0	0	0	0	0	1864.04	0	0	0	0	0	0	0	0	0	0	0	0	0	0	0	3153.36	0	4284.88	0	2128.79	0	0	0	0	0	0	0	0	0	0	0	0	0
AHSG	Non-matrisome	Non-matrisome	GO:CC extracellular matrix (GO:0005576, GO:0005578 & GO:0031012) & GO:CC not extracellular matrix	P29700	P29700;F1SFI7	FETUA_PIG	0	44762.4	45411.3	78237.4	96461.9	64202.3	150493	95404.5	54517.6	37659.2	164915	78470.2	140141	10122900	16780.4	12969.2	225863	92779.5	64143	11602.3	8880.71	5914.55	10614.8	19597.1	8264.24	26959	10764.5	23700.3	13531.5	18981.3	12685.9	8869.01	5274.79	8466.52	9295.46	12930.4	10211.6	3224.42	2419.98	3953.37	2754.53	4256	5249.92
AIF1^	Non-matrisome	Non-matrisome	GO:CC not extracellular matrix	A5D9N3	A5D9N3	A5D9N3_PIG	0	779.676	0	477.721	1259.91	721.894	0	1061.55	0	1708.31	2796.2	0	1894.84	0	639.185	0	630.182	0	0	0	0	0	0	0	0	0	0	0	0	0	0	0	0	0	0	0	0	0	0	0	0	0	0
AIF1°	Non-matrisome	Non-matrisome	GO:CC not extracellular matrix	P81076	A5D9N3;P81076	AIF1_PIG	0	1802.43	0	2810.58	0	1604.03	0	3440.7	0	5851.8	6196.7	0	6042.19	0	1073.53	0	1652.26	0	0	0	0	0	0	0	0	0	0	0	0	0	0	0	0	0	0	0	0	0	0	0	0	0	0
AIFM1	Non-matrisome	Non-matrisome	GO:CC not extracellular matrix	F1RTH3	F1RTH3	F1RTH3_PIG	0	50280.3	39125.5	38605.3	23346.4	50048.9	25696.4	10809.6	16290.8	7931.35	11140.5	22319.6	12967.2	0	69385.8	38546.3	43250.5	54950.2	56236.2	50711.1	30611.9	88883.2	44202.8	61001.5	57434.8	9064.65	9826.92	4601.06	20513.2	9599.33	19336.4	50863.7	49231.8	49294.3	56057.6	59064.8	46115.3	56168.9	45979.8	42408.5	58085.6	48731.5	57134.7
AIMP1	Non-matrisome	Non-matrisome	GO:CC extracellular matrix (GO:0005576, GO:0005578 & GO:0031012) & GO:CC not extracellular matrix	A0A287AKA2	A0A287AKA2	A0A287AKA2_PIG	0	6828.83	2360.56	4942.66	5262.06	5349.4	3516.46	5572.2	3248.82	5592.92	6620.64	4922.96	6483.67	0	4269.32	12408.5	3974.53	3869.66	4670.21	9012.43	5375.36	5855.22	5973.82	7044.33	6106.53	7376.91	2129.49	6715.93	8133.58	10783.2	7594.2	3318.65	3434.15	3456.38	5452.4	4221.75	5886.5	2939.16	3045.67	1763.7	1939.35	3588.97	3965.3
AIMP2	Non-matrisome	Non-matrisome	GO:CC extracellular matrix (GO:0005576, GO:0005578 & GO:0031012) & GO:CC not extracellular matrix	F1RFM7	F1RFM7	F1RFM7_PIG	0	1835.27	1963.53	1749.69	0	3487.97	4148.23	3040.06	1079.21	2689.26	5232.36	0	3111.38	0	989.38	0	1448.17	3376.23	1130.67	0	2352.11	2210.96	1348.95	1295.66	3624.91	3362.32	0	4803	0	2874.28	0	409.787	1758	2243.42	2431.84	1619.31	3333.66	0	969.869	0	0	774.703	0
AK1	Non-matrisome	Non-matrisome	GO:CC not extracellular matrix	P00571	P00571	KAD1_PIG	0	906564	1427930	1301010	1326120	1224550	827134	510791	517216	176507	170181	654370	303167	56377500	1349530	238602	1483880	1008890	1236780	473115	283526	140302	277933	731883	275772	86835.5	105325	83896.6	107117	101914	88028.3	156147	421582	369857	195565	468084	147617	229793	297300	136790	143695	334828	246539
AK2	Non-matrisome	Non-matrisome	GO:CC not extracellular matrix	A0A8D0QIL0	A0A8D0QIL0	A0A8D0QIL0_PIG	0	30338	46785	45077.5	60570.8	47735.6	22053.1	15740.2	19467.2	11133.9	15451.7	24706.7	10878.7	0	86735.7	27558.2	95768.9	54541.1	46360.8	10216.9	5118.41	2320.06	6669.35	15387	3681.74	11681.7	5147.81	10879	4958.63	6459.06	2864.1	3800.92	9970.79	5871.12	5408.8	14218.4	2046.38	6850.05	7102.52	6214.07	8268.26	4380.77	9164.5
AK3	Non-matrisome	Non-matrisome	GO:CC not extracellular matrix	A0A4X1W814	A0A4X1W814	A0A4X1W814_PIG	0	37088.2	72614.8	56453.3	93271	50074.6	69509.7	26946.4	28986.6	34638.9	20309.6	53588.6	32710.5	0	68013.1	134589	101120	47016.4	59363.7	11684.7	26386.7	12535.9	25058.1	29417.4	19694.1	10038.2	5239.81	10106	10638.9	4844.84	4679.81	10601.9	20865.6	12884.1	37129.3	25626	15048.3	17633.4	20187.1	15036.6	16105.8	9701.46	18009
AK4	Non-matrisome	Non-matrisome	GO:CC not extracellular matrix	B1NI70	B1NI70	B1NI70_PIG	0	7902.75	7329.35	7925.34	7624.23	10607.1	5870.58	5396.27	0	0	7652.57	19299.1	7816.88	0	4671.08	18279.5	7609.48	7030.94	5624.15	9689.04	5767.79	5726.05	6499.56	16882.6	8123.77	0	0	0	0	5623.3	5424.85	5963.94	6482.15	6256.92	6445.04	8792.88	7565.79	7790.88	4397.47	0	5942.86	9398.91	0
AK5	Non-matrisome	Non-matrisome	GO:CC not extracellular matrix	A0A5G2RN95	A0A5G2RN95	A0A5G2RN95_PIG	0	0	0	0	4797.15	0	7319.65	12356.8	12590.8	5329.33	22220	16936.4	8703.17	0	0	0	0	0	0	4431.51	5751.1	0	1439.14	1118.7	0	74622.5	9850.58	30940.4	35141.8	8181.12	24889.5	0	0	1803.15	1928.05	0	0	5364.2	0	0	0	0	0
AK6	Non-matrisome	Non-matrisome	GO:CC not extracellular matrix	A0A287A3E1	A0A287A3E1	A0A287A3E1_PIG	0	0	0	0	0	0	0	0	0	0	0	0	0	0	0	0	0	0	0	0	0	0	2003	1834.52	1942.05	0	0	0	0	0	0	0	2642.25	1779.94	0	2474.17	0	0	1450.39	0	0	1643.62	0
AKAP1	Non-matrisome	Non-matrisome	GO:CC not extracellular matrix	A0A287BLS6	A0A287BLS6	A0A287BLS6_PIG	0	1745.16	2288.4	2873.14	2051.96	1580.39	1344.09	1342.75	0	0	0	0	1314.82	0	1387.54	10630.2	1613.41	2155.71	2151.95	3018.08	6288.58	5587.47	5950.16	3558.97	7172.4	0	0	0	2728.73	1656.58	0	6340.73	2956.76	3669.23	9945.95	2624.77	5391.21	3887.35	3558.97	5604.59	4625.81	2219.51	5981.36
AKAP10	Non-matrisome	Non-matrisome	GO:CC not extracellular matrix	P57770	P57770;A0A287B518	AKA10_PIG	0	0	0	0	0	0	0	0	0	3886.7	0	5362	0	0	0	0	0	0	0	0	0	0	0	0	1373.57	12854.1	0	17626.5	9761.01	3252.12	4367.19	1434.57	0	0	0	0	0	0	0	0	0	0	0
AKAP11	Non-matrisome	Non-matrisome	GO:CC not extracellular matrix	F1RJX0	F1RJX0	F1RJX0_PIG	0	0	0	0	0	0	655.132	0	0	2526.34	0	1771.54	0	0	0	0	0	0	0	0	0	0	0	0	0	2623.41	0	0	1370.67	2689.54	1775.8	0	0	0	0	0	0	0	0	0	0	0	0
AKAP12	Non-matrisome	Non-matrisome	GO:CC not extracellular matrix	A0A287A3A3	A0A287A3A3	A0A287A3A3_PIG	0	13062.1	8511.1	10148.4	20385.3	8559.64	30630.4	44880.5	22664.1	40792.6	39233	23464.8	40194.7	0	5379	15230.9	9532.41	4715.65	7082.24	15941.1	24554	4421.69	5313.32	5479.85	5519.49	18981.7	20307.9	20671.3	16422	17307	31436.3	2620.36	3154.31	5561.89	6955.46	4178.55	5819.7	2493.7	3616.86	0	2030.99	2489.6	2349.68
AKAP17A	Non-matrisome	Non-matrisome	GO:CC not extracellular matrix	A0A5G2R508	A0A5G2R508	A0A5G2R508_PIG	0	0	0	0	0	0	0	1443.92	0	0	0	0	0	0	0	0	0	0	0	0	0	0	0	0	0	4589.36	0	0	0	1913.95	1066.43	0	0	0	0	0	0	0	13782.5	0	19880	0	1146.6
AKAP8L	Non-matrisome	Non-matrisome	GO:CC not extracellular matrix	A0A480T358	A0A480T358	A0A480T358_PIG	0	0	0	0	1562.45	693.705	0	0	0	0	3410.5	0	2017.82	0	866.932	0	0	802.686	0	3356.07	2157.29	2501.15	1958.77	1441.91	1715.26	0	0	0	0	2157.97	0	1398.82	1173.82	2925.95	1814.82	1475.53	1450.63	0	0	0	0	0	0
AKAP9	Non-matrisome	Non-matrisome	GO:CC not extracellular matrix	I3LFV9	I3LFV9	I3LFV9_PIG	0	0	0	0	0	0	0	0	0	0	1231.15	0	0	0	0	0	0	0	0	0	0	0	0	0	0	3736.31	0	4300.72	4232.07	2011.83	0	0	0	0	0	0	877.544	0	0	0	0	337.596	937.686
akr	Non-matrisome	Non-matrisome	gene not present in GO IDs	Q2TJA5	Q2TJA5	Q2TJA5_PIG	0	10288	25508.2	16728.9	29686.7	18708.9	18391.3	8699.8	9421.55	4658.91	6032.61	17926	9230.12	0	28766.2	27461.8	37802.9	17060.2	22330.7	5791.91	6046.49	16819.4	10683.7	11827	16314.6	5304.75	7224.65	7471.1	0	5740.14	4207.62	2465.22	9110.95	7970.79	14772	10226.4	8155.24	8755.57	11756.3	12488.2	12848.6	11505	17458.1
AKR1A1	Non-matrisome	Non-matrisome	GO:CC not extracellular matrix	P50578	P50578	AK1A1_PIG	0	16386	18883.4	31207.3	35476.3	39820.9	46045.9	52879.6	34151.1	34693.6	55244.6	55233.3	40382.3	0	23072.1	672155	42452.8	33561.5	25293.8	3503.82	0	6027.24	3688.23	10101.2	5933.47	0	9490.79	10093.3	0	8253.38	24030.1	1081.68	4851.39	4922.01	3660.77	7762.96	0	5444.66	7993.9	7267.06	4316.27	8914.97	12095.1
AKR1B1	Non-matrisome	Non-matrisome	GO:CC not extracellular matrix	P80276	P80276;A0A5G2R274	ALDR_PIG	0	71025	168061	161852	103067	141639	155550	47573.8	27688	47088.5	19235.8	47998.3	29003.7	0	92220.2	27942.9	178860	136193	112370	2792.94	13598.4	1601.63	5261.42	21925.9	3475.25	4220.8	2614.64	9301.23	5139.99	3105.73	0	1846.63	14772.7	2951.19	4966.62	13911.1	1812.31	4022.81	13356	5408.22	4113.93	10192.6	11476.2
AKR1C3	Non-matrisome	Non-matrisome	GO:CC not extracellular matrix	A0A480SLU2	A0A480SLU2	A0A480SLU2_PIG	0	1104	4303.99	2213.21	1777.74	1983.92	0	0	0	0	0	0	0	0	2628.66	0	2399.05	1681.5	1699.38	0	0	0	1141.73	1313.24	0	0	0	0	0	0	0	0	1001.88	0	1313.53	913.886	0	0	2067.65	0	0	1700.8	0
AKR1D1	Non-matrisome	Non-matrisome	GO:CC not extracellular matrix	F1SNJ5	F1SNJ5	F1SNJ5_PIG	0	0	0	0	0	0	8382.83	0	2055.39	0	2863.89	3836.06	6427.55	0	0	0	0	0	0	0	0	0	0	0	1409.23	0	0	23377.1	0	3434.9	0	0	0	1141.01	0	0	2355.92	0	0	0	0	0	0
AKR7A2	Non-matrisome	Non-matrisome	GO:CC not extracellular matrix	F1SUP1	F1SUP1	F1SUP1_PIG	0	6754.77	7254.74	7672.89	9487.72	6613.42	10403.7	7384.43	5345.73	6134.78	6503.8	5302.25	5968.62	0	7861.08	0	11467.5	5376.63	6802.48	1982.44	0	0	1748.59	2406.7	2323.09	0	0	4047.59	0	5272.38	0	1179.1	1501.28	1691.2	3104.16	2388.34	785.333	0	2667.29	0	3805.27	3270.64	2786.74
AKT1	Non-matrisome	Non-matrisome	GO:CC not extracellular matrix	G9BWQ1	G9BWQ1	G9BWQ1_PIG	0	1412.11	2259.58	3312.57	2107.32	1997.6	5380.81	4281.79	2111.83	3770.46	4849.1	5875.04	6065.79	0	1040.36	0	1327.27	1319.46	944.966	2994.38	10140.3	3525.55	3090.82	2439.24	4681.02	18450.4	0	5383.84	5342.66	5996.79	4637.33	1241.62	1833	2512.69	5580.36	1888.36	5953.46	0	1372.49	0	0	2293.34	1992.79
AKT1S1	Non-matrisome	Non-matrisome	GO:CC not extracellular matrix	F1RHU2	F1RHU2	F1RHU2_PIG	0	9460.63	0	5824.29	4033.24	5828.22	0	4477.45	0	0	0	0	0	0	7115.37	0	7831.22	3898.54	6895.34	4371.99	0	5316.93	2033.32	5668.93	3640.44	0	0	0	0	0	0	0	2227.92	1964.23	0	4858.13	0	0	0	0	0	3728.11	0
AKT2	Non-matrisome	Non-matrisome	GO:CC not extracellular matrix	K7GLV2	K7GLV2	K7GLV2_PIG	0	4274.06	6002.32	7644.42	4666.38	3877.75	7437.24	5925.84	3750.77	4133.42	5787.43	8348.96	5469.17	0	3176.64	0	4746.28	4515.11	3509.64	3668.91	11912.4	6306.62	6382.68	5959.41	8459.24	13309.8	8538.34	11068	6100.27	6200.07	7488.11	3686.23	6909.43	5761.71	7051.64	3454.56	9680.54	6043.81	4956.15	4785.08	3927.1	3842.53	6640.73
ALAD	Non-matrisome	Non-matrisome	GO:CC extracellular matrix (GO:0005576, GO:0005578 & GO:0031012) & GO:CC not extracellular matrix	A0A287BGW4	A0A287BGW4	A0A287BGW4_PIG	0	4521.68	7212	5104.56	5349.42	4731.17	5593.32	4653.04	4635.74	5471.14	4503.63	0	5655.16	0	6027.19	12690.6	6339.34	3874.03	6052.25	2918.68	0	2955.15	988.226	2972.41	983.186	0	3066.32	3258.44	0	2709.96	0	0	1938.32	0	1853.48	2072.61	0	3396.17	3867.55	2300.01	2761.99	1779.8	0
ALB^	Non-matrisome	Non-matrisome	GO:CC extracellular matrix (GO:0005576, GO:0005578 & GO:0031012) & GO:CC not extracellular matrix	P08835	P08835	ALBU_PIG	0	446360	962650	799063	937526	701563	656571	1152770	892479	603216	1320360	1163680	810772	68408600	680964	389023	1105030	688192	638008	110514	150898	19706.4	54155.9	156152	21238.2	171869	294246	284616	154471	181793	108403	54753.9	66891.3	49575.6	53437.4	104173	23220.5	66283.3	123393	167062	78204.6	39535.1	59314.1
ALB°	Non-matrisome	Non-matrisome	GO:CC extracellular matrix (GO:0005576, GO:0005578 & GO:0031012) & GO:CC not extracellular matrix	A0A8W4F9M4	A0A8W4F9M4	A0A8W4F9M4_PIG	0	755033	541315	1309450	523183	613254	911948	2063080	1120910	777271	1737190	30579.9	2113320	0	484939	835204	729006	36636	1126420	504491	1078850	125359	210040	521234	169845	2958910	1551370	3143330	1117130	382645	955850	559042	303222	352305	438947	398419	230563	539389	471407	1687180	480307	256144	848758
ALCAM	Non-matrisome	Non-matrisome	GO:CC not extracellular matrix	A0A5K1UB60	A0A5K1UB60	A0A5K1UB60_PIG	0	1410.21	0	0	1934.4	1092.88	0	1309.36	0	2677.3	2973.36	0	2568.8	0	1352.49	0	1511.09	0	1408.09	2205.29	0	0	880.166	0	0	0	3652.99	6338.75	0	3509.2	0	0	0	1039.61	740.05	0	565.448	4488.52	0	0	2170.96	1535.53	1827.27
ALDH16A1	Non-matrisome	Non-matrisome	GO:CC not extracellular matrix	A0A287AEA5	A0A287AEA5	A0A287AEA5_PIG	0	4926.85	6387.41	4106.72	6295.09	4349.63	13000.5	19141.4	15582.3	13104.9	16737.5	27266.4	11699	0	1762.09	0	2614.85	3165.29	2203.98	6776.24	11025.5	3125.21	4725.62	3586.57	3773.29	37332.3	17232.1	23861.7	17706.1	11331.6	14096.7	6024.88	5064.17	6102.91	5297.92	4050.37	5711.4	4997.86	3550.95	5755.5	4280.18	4018.66	6629.1
ALDH18A1	Non-matrisome	Non-matrisome	GO:CC not extracellular matrix	F1SC47	F1SC47	F1SC47_PIG	0	0	1594.44	0	2483.43	1810.42	3472.09	3182.54	2396.62	5067.97	5482.19	3459.02	4212.23	0	0	0	0	0	0	2113.38	2835.25	0	0	0	0	13834.4	7433.86	10037	11398.9	17076.6	12634.4	0	0	1339.94	2152.72	909.516	0	0	0	0	0	0	0
ALDH1A1	Non-matrisome	Non-matrisome	GO:CC not extracellular matrix	I3LRS5	I3LRS5	I3LRS5_PIG	0	8131.67	15956.4	17967.4	17389.6	13591.5	37094.8	19164.9	14395.3	17693.3	26017.4	21257.8	30240.1	0	11285.4	31937	17951.2	12779	16249.9	2232.74	6336.9	1698.85	2610.36	4199.29	6609.42	13346.5	13406	21075.8	12747.4	12491.8	10760.2	2753.68	1939.63	4231.1	1584.62	4788.01	3704.37	5485.51	2888.15	3990.77	4710.34	8161.56	7936.45
ALDH1A2	Non-matrisome	Non-matrisome	GO:CC not extracellular matrix	I3LK62	I3LK62	I3LK62_PIG	0	0	0	0	1028.58	680.533	2945.45	1910.03	1123.33	0	2986.41	0	1882.42	0	0	0	0	0	0	0	0	0	0	0	0	0	0	0	0	0	0	0	0	0	0	0	0	0	0	0	0	0	0
ALDH1A3	Non-matrisome	Non-matrisome	GO:CC not extracellular matrix	A0A480JMD7	A0A480JMD7	A0A480JMD7_PIG	0	0	0	1633.61	1459.71	932.594	0	1987.12	0	1478.69	0	0	1130.9	0	739.125	0	1209.68	2262.14	875.29	0	0	0	0	0	0	0	0	0	0	1908.79	0	0	0	0	0	589.257	0	0	0	0	0	0	0
ALDH1L1	Non-matrisome	Non-matrisome	GO:CC not extracellular matrix	A0A286ZYU8	A0A286ZYU8	A0A286ZYU8_PIG	0	0	0	0	1360.65	0	3900.6	0	2883	3771.94	1640.7	0	3908.96	0	726.73	0	0	0	0	0	0	0	0	0	0	0	0	0	0	1498.51	0	0	0	0	0	0	0	0	0	0	0	0	0
ALDH1L2	Non-matrisome	Non-matrisome	GO:CC not extracellular matrix	F1SG41	F1SG41	F1SG41_PIG	0	3405.29	2657.02	3764	8429.73	3488.41	9478.21	16846	9327.76	18881.8	21478.8	13583.3	8613.31	0	1989.02	0	3063.24	1869.32	2679.85	3452.7	0	0	828.837	1606.2	0	8042.53	12249.4	11763.7	8194.38	12314.2	8749.53	0	1292.59	3262.77	0	1817.94	0	0	0	0	1194.95	1133.62	0
ALDH2	Non-matrisome	Non-matrisome	GO:CC not extracellular matrix	Q2XQV4	Q2XQV4	ALDH2_PIG	0	19187.5	28507.7	29717.5	22747.9	31597.5	21063.8	21274.7	21469.9	19892.5	30780.3	26744.1	14606	0	43665.1	48656.6	36597.9	32919.6	29651.2	8525.44	5977.55	0	3288.6	13845.3	1869.88	7733.18	24022.6	15047.7	10203.1	19023.3	9292.42	4750.84	10421.6	7883.37	3287.71	8945.91	0	9641.01	6366.09	4911.76	5845.24	6318.31	7511.76
ALDH3A2	Non-matrisome	Non-matrisome	GO:CC not extracellular matrix	A0A287BBJ7	A0A287BBJ7	A0A287BBJ7_PIG	0	43881.3	42137.9	24951.1	42587.5	52515.6	30081.4	32234.5	32172.4	39089.8	52415.6	36500.8	32361.4	0	45366.5	24470.3	53705.8	59058.6	45126.5	37843.9	34333.6	16708.6	23738.4	29125.4	22082.9	37672	61543.7	24470.3	28143.9	28602	29360	61558.8	32286	42986.6	41873.9	54872.5	26629.5	77956.7	85116.5	54249.2	76656.1	67287.5	79483.6
ALDH4A1	Non-matrisome	Non-matrisome	GO:CC not extracellular matrix	A0A8W4FR13	A0A8W4FR13	A0A8W4FR13_PIG	0	12262.9	16886.8	9837.94	15562.7	26267.8	11294.3	7759.21	5898.24	4647.65	1419.29	11141.6	3382.84	3174110	20679.9	44065.2	22825.2	23690.2	20734.3	4760.96	9869.6	3476.63	5459.85	11904.8	6129.98	0	0	0	5740.64	2410.09	2430.38	6956.66	9206.27	5181.2	8061.61	11351	7316.81	10211.2	11143.1	8025.05	10178.4	13851.2	11103.6
ALDH5A1	Non-matrisome	Non-matrisome	GO:CC not extracellular matrix	F1RUE3	F1RUE3	F1RUE3_PIG	0	6930.64	7420.81	5932.79	6620.26	7230.21	7079.23	0	3587.35	3748.37	0	5256.35	0	2035030	7499.41	8123.47	11016.1	6805.89	8359.32	2717.51	3005.94	0	1280.57	4040.48	1538.97	0	0	0	0	1793.37	0	1789.99	2231.67	2533.76	2035.94	3051.86	1654.19	3428.42	2957.7	0	2165.26	3001.77	2892.79
ALDH6A1	Non-matrisome	Non-matrisome	GO:CC not extracellular matrix	F1S3H1	F1S3H1	F1S3H1_PIG	0	21302	25142.4	25581.5	25728.2	26535.3	22664.4	13083.3	22627.5	23233.4	9759.31	25033.5	12917.2	0	31117.8	82324.4	43091.4	22069.7	32092.2	9139.76	17962.2	5481.77	11840.7	14537.9	12719.1	0	23051.5	0	14138.4	12253.9	0	18284.6	19348.6	22833.2	12855	24156.2	13900.8	18196.7	22078.9	18897.2	24304	24356.5	24330.8
ALDH7A1	Non-matrisome	Non-matrisome	GO:CC not extracellular matrix	A0A287AWM0	A0A287AWM0	A0A287AWM0_PIG	0	7106.4	8549.8	9142.2	10709.7	7715.1	7696.1	6162.96	6057.39	6244.63	8220.99	6833.72	3903.34	0	11820.7	22461.2	13391.3	7794.47	9241.34	3000.8	0	0	643.475	2656.56	548.13	0	0	3243.12	0	3026.24	0	0	1379.99	1998.13	1337.77	2483.87	0	3718.88	2856.46	3220.92	2927.01	2416.99	2908.67
ALDH9A1	Non-matrisome	Non-matrisome	GO:CC not extracellular matrix	Q29228	Q29228	AL9A1_PIG	0	8431.19	15622.7	16581.6	17366.6	16486.3	21694.7	13709.5	11363.9	12342.1	14558.2	13070.8	7917.14	3215340	21034.2	29047.5	30777.2	19494	20101.7	3746.25	7428.38	0	2227.12	4762.65	1587.02	0	9057.02	6773.97	0	4066.93	10997.2	0	2716.56	2413.79	0	5209.58	0	5182.3	5575.77	4976.79	3261.62	4960.51	5576.24
ALDOA	Non-matrisome	Non-matrisome	GO:CC extracellular matrix (GO:0005576, GO:0005578 & GO:0031012) & GO:CC not extracellular matrix	A0A287BFY0	A0A287BFY0	A0A287BFY0_PIG	0	1114980	2198620	1828850	1450370	1473830	1270810	603187	653446	369408	147906	723255	362692	360418000	1341610	205454	2012020	1702630	1626660	246384	111578	42737.5	270745	676679	160129	38668.4	80724.6	36070.2	94268.7	70744.5	56267.7	171527	374366	173134	150218	491575	52572.2	450720	540627	407055	329131	208385	368344
ALDOB	Non-matrisome	Non-matrisome	GO:CC not extracellular matrix	A0A286ZTA4	A0A286ZTA4	A0A286ZTA4_PIG	0	1676.06	0	2490.8	3465.63	1233.28	8563.96	4578.05	4511.66	4053.96	8737.36	5586.23	8141.75	0	867.424	0	2088.83	1318.59	3911.46	0	3292.76	0	0	0	0	3214.41	5672.11	8241.57	4603.95	2414.68	4966.84	0	0	2266.79	0	0	3892.11	0	0	0	0	0	1785.75
ALDOC	Non-matrisome	Non-matrisome	GO:CC extracellular matrix (GO:0005576, GO:0005578 & GO:0031012) & GO:CC not extracellular matrix	A0A286ZWI1	A0A286ZWI1	A0A286ZWI1_PIG	0	3904.34	9400.31	14626.5	9165.69	7582.83	27713.8	3251.3	7520.3	1745.29	9737.34	0	10731.5	0	13758.3	31722.9	5899.03	7850.12	8981.84	0	6555.92	0	3593.39	7963.72	3686.9	0	0	0	0	1163.87	0	0	4523.82	0	0	5986.49	1822.31	0	3880.79	0	3272.75	2634.85	4275.91
ALG10	Non-matrisome	Non-matrisome	GO:CC not extracellular matrix	I3LNP0	I3LNP0	I3LNP0_PIG	0	0	0	700.409	0	0	1350.83	0	1061.12	5112.63	7200.29	4042.13	2744.79	0	0	0	0	0	0	0	0	0	0	0	0	0	5153.3	0	0	0	0	0	0	0	0	0	0	0	0	2789.89	0	1800.58	0
ALG11	Non-matrisome	Non-matrisome	GO:CC not extracellular matrix	F1RMC7	F1RMC7	F1RMC7_PIG	0	0	0	0	0	0	0	0	0	0	0	0	0	0	301.591	0	0	0	0	0	0	0	0	0	0	0	0	0	0	3649.84	0	0	0	0	0	0	0	0	1450.38	0	2190.37	0	0
ALG12	Non-matrisome	Non-matrisome	GO:CC not extracellular matrix	F1RXR3	F1RXR3	F1RXR3_PIG	0	0	0	0	0	0	0	0	0	0	0	0	0	0	0	0	0	0	0	0	0	0	0	0	0	0	0	0	0	0	0	0	0	0	0	0	0	0	604.809	0	866.728	745.261	1497.98
ALG2	Non-matrisome	Non-matrisome	GO:CC not extracellular matrix	F1SSE6	F1SSE6	F1SSE6_PIG	0	0	0	1242.49	1713.1	0	2352.84	2232.55	0	1898.79	3465.27	2604.13	2345.08	0	0	0	0	0	0	1756.55	0	0	0	0	902.342	9724.93	0	6183	5015.88	3797.4	5982.18	0	1278.4	1284.83	0	655.715	0	1585.9	689.674	0	2365.83	0	0
ALG5	Non-matrisome	Non-matrisome	GO:CC not extracellular matrix	F1RS38	F1RS38	F1RS38_PIG	0	1640.3	0	0	3535.01	0	5168.3	3586.29	10112.9	3408.43	0	11829.5	7665.92	0	0	0	0	1662.25	0	3486.33	6312.64	0	0	1024.97	1018.18	17636.3	14547	22382.3	16171.7	6453.59	15519.6	0	2463.74	2686.93	0	0	0	0	0	0	4121.27	2153.33	4273.54
ALKBH3	Non-matrisome	Non-matrisome	GO:CC not extracellular matrix	A0A287B3Y6	A0A287B3Y6	A0A287B3Y6_PIG	0	0	0	0	0	1475.6	0	0	0	0	0	0	0	0	922.955	0	1166.91	2236.06	963.957	0	0	0	0	0	0	0	0	0	0	0	0	0	0	0	0	1080.28	0	0	0	0	0	0	0
ALOX15	Non-matrisome	Non-matrisome	GO:CC not extracellular matrix	P16469	A0A2C9F3G7;P16469	LOX15_PIG	0	3855.68	0	0	7020.94	1850.85	9019.04	10142.5	7130.41	15913.7	11188.5	0	5848.44	0	1725.22	0	1928.59	0	2575.93	5733.7	0	0	1130.94	0	0	6383.5	16503	12915.1	0	13269.1	0	0	0	4739.35	5458.26	0	0	0	0	0	0	0	0
ALOX5	Non-matrisome	Non-matrisome	GO:CC extracellular matrix (GO:0005576, GO:0005578 & GO:0031012) & GO:CC not extracellular matrix	K7GQZ4	K7GQZ4	K7GQZ4_PIG	0	0	0	0	1551.53	0	0	0	3015.6	2980.8	3869.84	5183.83	2864.5	0	0	0	0	0	0	2769.21	0	0	0	0	0	0	5331.47	0	13706.6	2679.12	0	0	0	0	0	1313.97	0	0	0	0	0	0	0
ALPK2	Non-matrisome	Non-matrisome	GO:CC not extracellular matrix	A0A287A1R9	A0A287A1R9	A0A287A1R9_PIG	0	1282.61	3255.67	0	0	1793.93	0	0	0	0	0	0	0	0	0	0	1350.8	2372.63	0	1632.48	0	1613.15	1155.86	1696.2	2181.82	0	0	0	0	0	0	2478.4	1739.17	2170.83	2438.89	1448.83	3151.56	2097.35	0	0	0	0	0
ALPK3	Non-matrisome	Non-matrisome	GO:CC not extracellular matrix	A0A287ABZ9	A0A287ABZ9	A0A287ABZ9_PIG	0	1971.6	3914.32	3012.81	2627.03	2837.61	2214.09	0	0	0	0	9501.12	0	0	3693.92	6634.69	3440.93	2559.57	2619.94	3178.63	10296.2	1954.38	1702.2	2594.14	2212.41	0	0	0	0	0	0	0	2475.93	2235.45	2753.47	1887.53	5718.78	2883.82	4375.78	3812.36	3248.16	2676.16	1847.83
ALPL	Non-matrisome	Non-matrisome	GO:CC extracellular matrix (GO:0005576, GO:0005578 & GO:0031012) & GO:CC not extracellular matrix	A0A4X1W3F8	A0A4X1W3F8	A0A4X1W3F8_PIG	0	961.456	2325.22	2116.62	1377.46	1611.79	2991.97	0	3130.44	3636.94	1067.02	3533.42	3983.17	0	823.691	0	1552.61	1103.66	1813.5	2252.14	1975.37	1415.65	1237.39	2037.5	1196.71	11304	0	5228.11	0	5085.76	3454.69	1725.01	1113	1100	1036.6	984.92	1020.13	2311.66	863.772	0	1300.94	1039	1261.73
ALYREF	Non-matrisome	Non-matrisome	GO:CC not extracellular matrix	A0A5G2R218	A0A5G2R218	A0A5G2R218_PIG	0	4034.71	4637.45	4033.09	4944.13	4289.19	3420.33	8635.85	3900.35	6151.01	9419.67	2794.06	4887.63	0	3911.1	0	4896.29	2927.67	2629.45	0	0	525.583	2000.5	2277.98	891.683	0	0	0	0	1941.69	0	1706.65	2420.65	0	1653.48	2141.9	0	0	2067.72	0	1428.14	0	0
AMBP	Matrisome-associated	ECM Regulators	GO:CC extracellular matrix (GO:0005576, GO:0005578 & GO:0031012) & GO:CC not extracellular matrix	P04366	F1SN71;P04366	AMBP_PIG	0	22869.1	20685.9	19272.6	33768.9	33683.3	48577.5	58639.4	55622.7	86089.2	78308.6	145929	56509.4	0	9866.42	14404.2	18251	21005.2	12310.4	21388.5	14107.1	6307.76	6602.83	9395.46	6262.51	25225.2	48916.1	70915.9	21752.6	117195	79931	24580.6	4307.74	6333.36	8497.39	9815.68	6051.85	6041.76	6651.54	7551.8	4624.37	5896.8	6213.05
AMDHD2	Non-matrisome	Non-matrisome	GO:CC not extracellular matrix	A0A286ZZ76	A0A286ZZ76	A0A286ZZ76_PIG	0	582.617	0	0	1724.51	0	2161.93	2394.22	3416.4	4191.12	0	4050.54	2533.37	0	628.982	0	0	0	0	0	0	0	0	0	0	0	0	0	0	1101.91	0	0	0	0	0	0	0	0	0	0	0	0	0
AMPD1	Non-matrisome	Non-matrisome	GO:CC not extracellular matrix	B5SYT7	A0A286ZPN9;B5SYT7	B5SYT7_PIG	0	60451.4	36286.8	56789.1	10284.2	33818.1	14149.2	6929.61	8246.52	7990.48	0	11537.6	7609.66	0	39710.9	90003.6	23653.7	22586.8	29428.7	60670.1	45693.4	41523.4	56870.5	74481.3	46217.5	0	17316.2	34518.2	24156.4	3953.3	17727.2	64594.6	96988.4	56819.7	30126.4	37068.7	53563.9	40202	55409.7	32365.2	25921.8	35680	28894.7
AMPD3	Non-matrisome	Non-matrisome	GO:CC extracellular matrix (GO:0005576, GO:0005578 & GO:0031012) & GO:CC not extracellular matrix	A0A286ZPN9	A0A286ZPN9	A0A286ZPN9_PIG	0	2058.38	2788.45	1869.02	2617.39	1739.24	0	0	0	0	0	0	0	0	1660.58	0	2915.04	3918.06	2033.22	0	3473.05	2712.23	2818.25	1468.36	2093.86	0	0	0	0	1871.16	0	2163.52	2849.16	2851.4	3663.46	2915.97	3260.74	3124.35	2590.41	0	3319.45	3090.58	2523.82
AMT	Non-matrisome	Non-matrisome	GO:CC not extracellular matrix	I3LIR4	I3LIR4	I3LIR4_PIG	0	423.937	0	0	0	0	0	0	0	0	0	0	0	0	182.523	0	549.363	0	779.759	0	0	0	0	0	0	0	0	0	0	0	0	0	0	0	0	0	0	0	0	0	0	0	0
AMY2	Non-matrisome	Non-matrisome	gene not present in GO IDs	P00690	I3LLP2;F1S574;F1S573;I3LSA5;P00690	AMYP_PIG	0	3080.75	6334.15	4534.45	2218.97	2058.07	3635.33	5103.62	3452.13	0	5449.09	0	5579.13	0	3511.71	24398.3	3124.69	0	2718.07	0	0	0	0	0	0	0	0	1983.73	0	0	0	0	823.133	0	0	611.562	0	0	2345.94	0	0	979.781	2666.94
ANAPC1	Non-matrisome	Non-matrisome	GO:CC not extracellular matrix	A0A286ZW91	A0A286ZW91	A0A286ZW91_PIG	0	0	0	0	0	0	535.302	0	2640.02	0	6405.9	0	0	0	0	0	0	0	0	0	574.027	0	0	0	0	0	0	2571.68	0	1176.92	3877.74	0	0	0	0	0	0	0	0	0	0	0	0
ANAPC7	Non-matrisome	Non-matrisome	GO:CC not extracellular matrix	I3L7Q8	I3L7Q8	I3L7Q8_PIG	0	0	0	1518.41	0	1230.67	2640.14	0	2545.47	0	3546.07	4261.72	4249.6	0	0	0	1251.68	1021.97	0	1446.24	1725.45	1105.67	958.054	0	679.087	0	0	0	0	1657.01	0	0	1314.2	0	0	1186.85	388.982	0	0	0	0	0	0
ANGPTL1	Matrisome-associated	Secreted Factors	GO:CC not extracellular matrix	A0A286ZJ76	A0A286ZJ76	A0A286ZJ76_PIG	0	0	0	0	436.629	0	0	3019.51	1247.29	356.22	2717.67	0	1298.55	0	0	0	0	0	0	0	0	0	0	0	0	9493.63	0	7595.15	42767.2	468.653	13945.5	0	0	0	0	0	0	0	0	0	0	0	0
ANGPTL2	Matrisome-associated	Secreted Factors	GO:CC not extracellular matrix	A8BV05	F1S3I1;A8BV05	A8BV05_PIG	0	2928.14	1874.76	1610.56	11464.9	2323.72	30424.9	27436.3	20223.9	33788.6	29633.4	25084.6	16056.3	0	527.969	0	1335.21	1190.17	635.462	6403.01	12199.2	1696.23	914.404	1039.13	1523.57	35143.5	25246	58702.9	41412.3	18863.2	30920	1198.57	1300.84	2788.79	2541.94	3624.84	2126.99	0	1006.37	0	0	1269.3	1268.61
ANGPTL4	Matrisome-associated	Secreted Factors	GO:CC extracellular matrix (GO:0005576, GO:0005578 & GO:0031012) & GO:CC not extracellular matrix	Q2TNK5	Q2TNK5	ANGL4_PIG	0	938.52	0	1198.13	1155.06	824.966	1550.38	0	0	1151	0	2792.06	1100.62	0	0	0	0	577.023	0	1181.97	2178.87	836.523	865.299	0	619.202	0	0	0	0	0	0	0	819.25	0	586.656	0	1224.81	0	0	0	0	0	0
ANGPTL5	Matrisome-associated	Secreted Factors	GO:CC not extracellular matrix	F1SV75	F1SV75	F1SV75_PIG	0	2387.94	0	0	3489.23	0	2426.57	13017	16874.5	17542.8	19221.1	12629.7	3574.83	0	0	0	0	0	0	2163.43	3213.6	0	0	0	0	19607.5	39398.9	47610.8	22559.1	21615.4	15250.3	0	0	0	0	0	0	0	0	3739.49	0	1044.87	0
ANGPTL7	Matrisome-associated	Secreted Factors	GO:CC extracellular matrix (GO:0005576, GO:0005578 & GO:0031012) & GO:CC not extracellular matrix	B7U4X2	B7U4X2	B7U4X2_PIG	0	0	0	470.611	0	188.595	0	0	0	0	0	3978.47	0	0	0	0	0	0	0	581.911	1220	591.285	369.398	0	0	4971.64	0	2337.86	0	1164.66	0	0	0	0	0	509.19	0	0	0	0	0	0	0
ANK1	Non-matrisome	Non-matrisome	GO:CC not extracellular matrix	F1SE30	F1SE30	F1SE30_PIG	0	1523	0	2633.38	0	2001.72	0	0	2490.78	2087.63	2134.32	3764.74	3048.38	0	1440.16	0	1586	1647.17	1246.74	1774.32	2153.87	2323.3	2578.49	2399.7	3308.78	0	5024.25	6087.24	0	3455.86	3741.27	3714.72	2850.92	4159.58	1404.93	1619.56	3304	2904.61	2914.18	3019.6	3050.49	2489.3	2098.15
ANK2	Non-matrisome	Non-matrisome	GO:CC not extracellular matrix	A0A5G2R203	A0A5G2R203	A0A5G2R203_PIG	0	898.807	0	899.927	0	1099.5	689.752	0	0	0	0	0	0	0	675.197	0	697.239	992.602	649.346	1842.38	0	891.258	1749.66	749.43	951.584	0	0	0	0	645.283	0	1882.53	1042.05	912.724	1648.42	942.957	1805.46	0	1425.35	0	0	1233.6	1236.69
ANK3	Non-matrisome	Non-matrisome	GO:CC not extracellular matrix	K7GNH3	K7GNH3	K7GNH3_PIG	0	1711.63	0	2106.1	1034.55	1852.75	0	0	0	0	0	0	0	0	1410.99	0	1264.85	1693.42	868.657	2365.86	0	2634.47	2977.96	1676.08	2613.8	0	0	0	0	1056.83	0	3594.09	2479.09	2523.31	2281.63	2502.16	3768.73	2323.09	2934.5	3781.99	3142.17	2268.06	2589.46
ANKFY1	Non-matrisome	Non-matrisome	GO:CC not extracellular matrix	A0A287B5D6	A0A287B5D6	A0A287B5D6_PIG	0	0	0	0	1126.82	495.156	2453.67	5380.87	2565.5	4198.67	9843.39	0	1890.05	0	464.252	0	0	0	0	1619.03	0	1163.13	1542.02	0	1118.54	8111.81	11495.2	9037.89	7228.92	5839.93	8880.93	3003.45	1025.74	2113.53	1791.18	1584.28	1033.91	0	1025.21	0	0	815.024	0
ANKRD1	Non-matrisome	Non-matrisome	GO:CC not extracellular matrix	Q865U8	Q865U8	ANKR1_PIG	0	0	2311.05	0	0	1427.67	0	0	0	0	0	3069.46	0	0	0	0	0	16551.3	0	0	1539.12	1716.83	0	1099.8	0	0	0	0	0	0	0	0	1497.1	0	0	10344.1	0	0	604.03	0	0	1600.89	0
ANKRD13A	Non-matrisome	Non-matrisome	GO:CC not extracellular matrix	A0A287AJ61	A0A287AJ61	A0A287AJ61_PIG	0	1577.74	1833.47	0	2836.59	1241.82	4720.2	6523.93	5034	5993.72	5860.43	8171.97	4940.03	0	683.099	0	0	1141.41	1349.15	2807.58	6775.53	2536.53	1243.54	2308.09	1658.98	27552	11805.9	24391.9	11869.4	8955.68	10899.2	2230.65	1341.3	2198.03	3406.23	1430.85	2639.61	0	1705.54	0	0	1662.04	1514.23
ANKRD17	Non-matrisome	Non-matrisome	GO:CC not extracellular matrix	A0A287BN54	A0A287BN54;F1RGE8	A0A287BN54_PIG	0	0	12386.2	0	0	0	0	7254.53	0	4116.54	0	0	4548.85	0	0	0	0	0	0	0	0	0	0	1206.39	0	0	0	0	0	2287.44	6101.1	0	0	0	5645.38	2813.63	1987.76	3224.95	0	0	3890.14	0	6478.1
ANKRD2	Non-matrisome	Non-matrisome	GO:CC not extracellular matrix	A0A5G2QKX2	A0A5G2QKX2	A0A5G2QKX2_PIG	0	28384.7	42789.7	26007.8	17893.8	33133.5	10230.3	2355.25	7252	2027.17	2441.32	13087	5334.34	0	67114.3	12044.4	52316.7	27951	36396.7	22984	38044.8	78678.7	76357.2	30628.6	53901.1	0	0	2470.41	16018.1	2756.82	11464.9	36691.4	37645.7	29514.4	95812.2	38437.3	33197.4	44996.9	51814.8	46346.5	60693.9	43725.4	42523.3
ANKRD27	Non-matrisome	Non-matrisome	GO:CC not extracellular matrix	F1RNY3	F1RNY3	F1RNY3_PIG	0	0	0	740.981	792.438	0	2049.04	4248.2	3377.96	5501.43	4435.81	8066.71	2282.08	0	0	0	0	577.163	0	2659.87	4605.26	872.712	1075.2	594.277	973.985	17169.7	7088.62	20656.8	6288.8	7894.94	10864.4	1418.87	1390.04	1748.92	1339.53	1410.3	1590.28	647.958	318.767	0	845.808	1692.49	1009.66
ANKRD28	Non-matrisome	Non-matrisome	GO:CC not extracellular matrix	A0A287ADP9	A0A287AAD4;A0A287ADP9	A0A287ADP9_PIG	0	1045.12	0	1121.35	0	1177.37	1765.35	1542.61	0	0	2591.5	1592.18	1151.25	0	0	0	0	943.506	0	1913.68	1263.95	0	636.74	0	0	0	0	2281.19	0	855.833	0	1766.74	1904.72	1591.47	0	1218.5	1201.56	0	641.092	0	0	632.385	1137.55
ANKRD29	Non-matrisome	Non-matrisome	GO:CC not extracellular matrix	A0A287B790	A0A287B790	A0A287B790_PIG	0	3361.15	3508.28	4671.91	6230.07	1907.77	16992.4	8524.42	11449	15285.9	10817.9	9203.17	14340.7	0	868.993	9262.35	3022.32	0	0	6510.79	4588.39	1663.22	860.81	0	1949.53	17924	5936.42	6357.84	7895.74	8438.46	6122.91	0	0	1705.12	2212.88	783.729	2027.67	0	0	0	0	0	0
ANKS1A	Non-matrisome	Non-matrisome	GO:CC not extracellular matrix	A0A8W4FKM1	A0A8W4FKM1	A0A8W4FKM1_PIG	0	937.088	1450.18	2055.87	2586.72	1150.31	3612.79	5389.27	4640.48	8747.18	8403.72	9538.54	4259.65	0	536.335	0	905.395	753.664	0	2937.85	4581.74	2458.63	2189.76	897.218	1825.1	18774.9	5187.07	10916.6	8433.19	6921.14	6344.46	1317.03	1201.26	1086.36	2900.76	1116.66	2790.78	1512.01	876.51	1398.91	0	926.273	1062.62
ANO10	Non-matrisome	Non-matrisome	GO:CC not extracellular matrix	F1SRD2	F1SRD2	F1SRD2_PIG	0	1417.74	0	0	1241.53	0	0	2083.77	2164.34	2402.07	3734.74	0	0	0	546.971	0	0	0	0	2702.77	3700.45	0	989.615	0	1279.79	4643.27	4543.53	8841.63	0	11412.8	4617.73	2365.43	1020.5	1981.27	0	1758.17	1822.83	1648.15	1384.96	0	1508.73	983.655	1088.99
ANO6	Non-matrisome	Non-matrisome	GO:CC not extracellular matrix	F1SGY1	F1SGY1	F1SGY1_PIG	0	2849	3692.88	2882.7	4422.19	2066.92	7170.55	15749	7508.27	6522.11	8985.65	7082.89	5576.9	0	1282.69	0	1598.85	2159.83	1545.11	1457.94	4007.27	0	868.327	0	1198.55	3112.5	6815.94	8370.15	4811.76	3816.08	5631.85	2329.43	1699.5	3025.39	0	1485.85	2151.35	4329.04	1730.07	0	2154.83	2464.93	0
ANP32A	Non-matrisome	Non-matrisome	GO:CC not extracellular matrix	A0A8D1TT21	A0A8D1TT21	A0A8D1TT21_PIG	0	4899.54	8330.79	8840.96	7251.59	6555.48	6203.99	5858	5101.56	5427.67	0	6765.57	4363.42	0	5745.72	0	6270.07	7503.16	6145.45	0	0	781.496	2101.1	3808.07	2540.08	0	0	0	0	0	0	0	3172.33	0	2699.31	3127.32	0	0	2400.25	0	0	3643.44	0
ANP32B	Non-matrisome	Non-matrisome	GO:CC not extracellular matrix	A0A480VC90	A0A480VC90	A0A480VC90_PIG	0	3688.07	4627.29	5515.5	7680.19	4838.68	4899.72	6074.39	2712.36	4997.84	5639.39	0	2370.18	0	4284.61	0	5726.9	3790.77	3200.42	0	0	0	1121.23	2100.06	0	0	0	0	0	2234.82	0	0	1749.99	0	0	2514.64	0	2112.17	2022.73	0	0	2497.31	0
ANP32E	Non-matrisome	Non-matrisome	GO:CC not extracellular matrix	A0A4X1SHC0	A0A4X1SHC0	A0A4X1SHC0_PIG	0	5673.23	3546.89	3684.49	5634.27	4567.27	4061.16	5126.89	3487.92	2711.34	4018.55	7008.05	3785.86	0	5123.02	0	4467.15	3213.44	3505.05	2841.53	1821.69	3763.41	4543.54	2609.29	3104.33	0	0	0	0	2448.64	0	1389.46	3292.58	3308.94	5111.71	3265.65	3256.6	4593.61	1164.25	0	1502.56	1972.49	2045.89
ANPEP	Non-matrisome	Non-matrisome	GO:CC not extracellular matrix	P15145	A0A5G2QI26;P15145	AMPN_PIG	0	6259.17	8450.58	8555.51	18225.8	6233.47	37381.3	13287.6	38834.4	26831.4	30014.9	49118.9	27689	0	4888.66	0	6055.81	4767.61	2259.78	20206.3	24168.3	2925.51	6127.92	8129.35	2794.46	178957	35826.9	104117	53371.9	78992.3	49233.1	5838.71	6465.48	6891.5	4592.25	4656.23	6278.12	3440.82	2452.15	0	5328.89	3758.16	0
ANTXR1	Non-matrisome	Non-matrisome	GO:CC not extracellular matrix	F1SPM5	F1SPM5	F1SPM5_PIG	0	1530.61	0	1690.87	795.683	1396.87	11082.3	22278.8	1725.83	13945.4	25989.4	41620.7	10381.6	0	366.727	0	948.403	568.021	0	3902.04	2356.2	647.103	1530.33	1144.9	1457.15	5322.37	25526.1	39134	19663.4	5139.79	14001.1	0	913.134	811.813	2188.98	1374.31	1970.95	0	0	3374.38	0	1516.52	0
ANTXR2	Non-matrisome	Non-matrisome	GO:CC extracellular matrix (GO:0005576, GO:0005578 & GO:0031012) & GO:CC not extracellular matrix	K9J4T3	K9J4T3	K9J4T3_PIG	0	0	0	1700.7	1521.38	2791.99	7252.28	6391.2	0	13654.7	12799.6	16883.9	5428.89	0	849.819	0	1516.36	2007.76	0	7532.84	5108.79	4607.58	3593.01	2423.82	4863.97	0	9489.35	19925.3	10596.6	3190.82	15303.5	2953.35	3058.43	2056.45	6129.99	3703.36	6565.77	0	1318.38	0	772.097	2566.23	1953.93
ANXA1^	Matrisome-associated	ECM-affiliated Proteins	GO:CC extracellular matrix (GO:0005576, GO:0005578 & GO:0031012) & GO:CC not extracellular matrix	F1SJB5	F1SJB5	F1SJB5_PIG	0	55331.4	32657.5	35236.8	115720	29771.7	112791	166724	158723	252432	182269	176716	160155	0	25147.9	6060.83	20869.8	18318	31730.3	17182.1	9224.81	3841.12	4659.56	10039.4	4369.3	90811.6	42378.4	66387.7	15322.1	61352.1	11295.8	5964.06	3782.11	4608.58	4339.76	20605.3	3240.87	7262.27	8210.42	10661.3	6008.71	6895.14	9710.34
ANXA1°	Matrisome-associated	ECM-affiliated Proteins	GO:CC extracellular matrix (GO:0005576, GO:0005578 & GO:0031012) & GO:CC not extracellular matrix	P19619	P19619;F1SJB5	ANXA1_PIG	0	78170.4	39580	48167.8	151993	50483.8	199240	217814	171618	248948	236266	122968	180534	7653560	37455.4	43551.8	47616.4	33628.1	43948.1	19261.5	21831.9	4290.32	8125.83	14212.7	6941.01	55960.6	48951.7	70813	28639.4	106084	30531.8	9008.36	8650.7	11005.1	9729.83	24198.9	5030.09	15383.3	8532.04	15497.3	12757.8	13204.6	17513.5
ANXA11	Matrisome-associated	ECM-affiliated Proteins	GO:CC not extracellular matrix	F1S2E2	F1S2E2	F1S2E2_PIG	0	33472.3	26665.6	26263	38083	28142.5	38163.9	34874.7	47879.4	54346.3	47730.8	40920.2	29776.3	0	33498.9	35580.5	29903.1	23037.3	24519	13064	14329.4	9345.86	15585.7	20143.4	13278	26702.9	37436.9	30257.4	18445.7	38901	17640.2	21536	21268.8	14468.6	16492.8	26067.6	19616.7	15877.9	17242.2	21527.5	15072.1	18146.2	17925.5
ANXA2	Matrisome-associated	ECM-affiliated Proteins	GO:CC extracellular matrix (GO:0005576, GO:0005578 & GO:0031012) & GO:CC not extracellular matrix	P19620	P19620;K7GKR6	ANXA2_PIG	0	430368	268838	274334	825405	253511	879846	1002410	1066220	1520620	1299510	718028	835894	15876900	181172	75207.8	293157	124105	163865	128368	94890.5	37301.6	62856	76240	49192.2	259029	438626	422246	253603	265536	257701	72821.6	71861.7	76877.3	68782.1	139614	59055.3	48489.4	50906.5	66077.4	39813	44472.7	72679.4
ANXA4	Matrisome-associated	ECM-affiliated Proteins	GO:CC not extracellular matrix	P08132	P08132;F1SLC4	ANXA4_PIG	0	13590.1	14742.1	14580.5	25597	13931.3	32893.7	23136.2	24439.9	44428.5	28026.6	28411	25633.6	0	13912.3	49278.5	15493.5	8720.3	11122.7	6870.09	7798.83	2482.27	4285.95	6598.05	3093.13	14589.4	17359.4	15636.8	9758.68	16467.2	11598.1	5936.04	5522.39	4097.15	4731.06	8355.31	7227.43	4929.71	4955.52	9062.65	6526.1	4987.96	4846.24
ANXA5	Matrisome-associated	ECM-affiliated Proteins	GO:CC extracellular matrix (GO:0005576, GO:0005578 & GO:0031012) & GO:CC not extracellular matrix	F2Z5C1	F2Z5C1	F2Z5C1_PIG	0	174090	148809	189969	422762	190400	446717	448866	318225	827562	416076	746452	280931	44221800	165064	42427	214518	124998	149358	192610	182590	25257.8	30835.5	66021.6	19690.9	513681	320809	684232	179728	536287	146972	21408.8	34729.7	45401.7	64959	79148.5	27092.2	21703	19248.1	26800.3	19114.7	12398.5	25906.6
ANXA6	Matrisome-associated	ECM-affiliated Proteins	GO:CC not extracellular matrix	F1S0V3	F1S0V3	F1S0V3_PIG	0	186969	111434	124655	124223	124003	116061	105130	136074	182294	137584	107823	73406.5	26979200	123776	137213	131002	92185.2	117998	38846.4	35110.9	14323.3	22371.9	57116.5	19355.9	54939.3	82356.4	86923.2	51623.6	80152.8	44688.6	49129.5	49944.2	32158	41416.7	63819.3	30784.5	71452.3	68263.2	80408.2	58791.3	49395.4	73316.3
ANXA7	Matrisome-associated	ECM-affiliated Proteins	GO:CC not extracellular matrix	I3LEY2	I3LEY2	I3LEY2_PIG	0	29595.4	19539.3	18928.1	15620	16097.2	14494.9	13331	15778.4	18953.1	16397.7	8041.8	9816.19	0	26363.6	46829	17570.2	13485	16730.8	7325.28	6561.63	6596.12	5833.46	8166.98	6802.46	9917.98	11101.7	8169.19	0	12241.2	7915.52	12063.5	8729.39	10518.9	10048.1	13132.6	10092.2	21063.2	24145.3	21253.4	14494.2	21763.4	14952.7
ANXA8	Matrisome-associated	ECM-affiliated Proteins	GO:CC not extracellular matrix	F1SEN1	F1SEN1	F1SEN1_PIG	0	2781.08	3388.7	3951.07	10441.2	4013.12	10480.3	14383.7	13760.8	12561.9	16100.3	7443.97	6414.21	0	2312.44	0	4994.99	4450.61	2176.1	1547.54	5448.3	0	1120.22	1344.23	0	11276.2	10917.8	8468.15	0	19597	0	0	0	1334	1628.96	1178.63	0	0	0	0	0	0	0
AOX1	Non-matrisome	Non-matrisome	GO:CC extracellular matrix (GO:0005576, GO:0005578 & GO:0031012) & GO:CC not extracellular matrix	I3LDH5	I3LDH5	I3LDH5_PIG	0	0	0	0	0	0	1531.4	3602.32	2964.13	2243.56	7995.89	7876.16	4567.54	0	0	0	0	0	0	913.553	0	0	0	0	0	0	4765.47	8279.8	0	1655.2	5335.85	0	0	0	0	0	0	0	0	0	0	0	0
AP1B1	Non-matrisome	Non-matrisome	GO:CC not extracellular matrix	F1RFI2	F1RFI2	F1RFI2_PIG	0	5210.05	5510.31	7269.28	7291.03	5852	9377.85	11607.2	9357.31	15083.3	13620.5	12588.9	9169.22	0	3432.79	0	3959.24	5756.38	6398.06	1803.61	2424.47	1077.93	1184.16	3165.1	1958.42	0	0	0	0	3836.75	1811.46	0	2184.19	2323.06	1882.87	2750.96	0	2781.04	3372.23	0	3291.27	2568.44	4498.2
AP1G1	Non-matrisome	Non-matrisome	GO:CC not extracellular matrix	F1S3C7	F1S3C7	F1S3C7_PIG	0	2594.57	0	1599.51	1643.88	1994.21	3527.22	3385.19	0	5694.4	3118.13	7128.55	4332.21	0	1088.67	0	1184.02	1187.95	1864.1	2355.6	0	956.019	1243.3	660.347	676.78	0	0	5505.5	6753.84	4197.76	4511.65	1720.53	1289.99	1405.96	0	1803.82	770.388	2847.75	2179.61	0	5215.64	1547.65	2725.6
AP1M1	Non-matrisome	Non-matrisome	GO:CC not extracellular matrix	A0A287AHA6	A0A287AHA6	A0A287AHA6_PIG	0	4136.96	2920.19	7251.91	5771.36	2432.13	0	9662.57	7794.93	6382.25	10447.9	7752.6	10081.9	0	2352.63	0	2537.63	2072.29	0	2786.19	0	0	2625.9	3123.42	2082.55	18621.9	0	0	0	13417.9	0	0	0	3788.53	3952.65	2400.03	2729.31	0	4552.74	0	0	4173.19	4958.92
AP1S2	Non-matrisome	Non-matrisome	GO:CC not extracellular matrix	A0A4X1UX87	A0A4X1UX87	A0A4X1UX87_PIG	0	0	0	0	964.066	0	0	0	1846.96	0	2230.98	3924.88	0	0	0	0	0	0	0	0	0	0	0	0	0	0	0	0	0	785.698	0	0	0	0	0	0	0	0	0	0	0	0	0
AP2A1	Non-matrisome	Non-matrisome	GO:CC not extracellular matrix	F1RH60	F1RH60	F1RH60_PIG	0	7937.21	6885.79	6341.05	12141.5	6437.79	13913.3	20562.5	17893.8	26819.8	29762.3	20036.7	16202.5	0	3041.79	0	4317.25	4594.9	4381.11	5965.2	7571.87	3039.7	2918.96	2911.92	2762.32	27054.2	31576.7	36892.1	32502.3	12716	25444.7	5234.06	4021	4826.96	3228	5486.37	3458.02	6289.11	4184.28	6343.74	6282.19	5611.65	4405.83
AP2A2	Non-matrisome	Non-matrisome	GO:CC not extracellular matrix	A0A5G2R890	A0A5G2R890	A0A5G2R890_PIG	0	2822.7	2780	2774.72	4595.22	2371.55	6268.31	8378.29	6775.37	13260.5	14545.4	9745.27	5465.23	0	1868.36	0	1362.36	1876.31	1872.07	4058.32	3717.21	0	1599.18	1024.85	1790.01	13576.6	12093.2	12233.2	10359.7	7955.99	8388.68	1779.92	1992.66	3578.62	1398.06	1988.66	2044.15	1744.88	1424.27	0	2263.2	1882.11	0
AP2B1	Non-matrisome	Non-matrisome	GO:CC not extracellular matrix	A0A4X1T854	A0A4X1T854;F1RFI2	A0A4X1T854_PIG	0	9248.78	9288.85	11157.1	18305.3	7367.81	23586.1	23247.1	23641.9	40415.2	36364.6	29914.4	18186.4	0	5147.67	6491.16	5678.99	5150.39	7637.72	7757.2	10118.5	4223.8	3115.11	5563.72	4898.13	21522.5	24819.7	25466.8	21669.5	19029.8	24782.9	5391.9	4770.01	5576.15	4144.06	5349.78	3945.59	7648.92	4169.49	6166.27	7027.65	5397.79	7165.54
AP2M1	Non-matrisome	Non-matrisome	GO:CC not extracellular matrix	A0A286ZU22	A0A286ZU22	A0A286ZU22_PIG	0	4559.98	4722.1	4622.93	7338.95	3134.71	12552.6	12007.1	9121.79	15814.8	16965.6	16591.7	9763.53	0	1826.46	0	2818	2526.75	2171.72	4992.53	7172.91	2645.89	2129.01	2970.78	3187.78	18024.6	11929.5	20444.2	19227.6	17414.3	13312	2593.15	2714.45	3563.42	3242.28	3063.53	4555.99	5449.44	2813.49	0	4270.13	3762.89	4049.21
AP2S1	Non-matrisome	Non-matrisome	GO:CC not extracellular matrix	A0A4X1W204	A0A4X1W204	A0A4X1W204_PIG	0	3062.62	2501.87	3936.99	6444.06	1701.15	6407.12	6079.27	8588.96	10435.3	11081.4	8776.16	6925.14	0	683.045	0	2163.6	1373.93	2320.2	4027.67	5696.4	1201.54	1223.24	2073.37	2309.09	13822.4	8347.78	13704.5	7779.69	8031.9	8778.21	1528.3	1548.8	3007.05	2418.37	1528.71	1541.69	2163.51	1769.04	2877.2	3287.5	1615.22	2107.39
AP3B1	Non-matrisome	Non-matrisome	GO:CC not extracellular matrix	F1S2G1	I3LRS3;F1S2G1	F1S2G1_PIG	0	1641.49	2196.99	2241.64	2910.14	1560.57	2636.52	5680.32	3299.86	5142.66	4909.81	7016.63	3613.38	0	820.73	0	1256.95	0	869.111	2328.15	0	1386.2	1476.69	0	1573.39	13293.6	8893.17	9401.73	6270	10373.2	9348.87	1592.8	1199.79	1717.57	1930.79	1455.27	1594.71	0	1525.2	0	2528.23	1338.65	0
AP3D1	Non-matrisome	Non-matrisome	GO:CC not extracellular matrix	A0A5G2R519	A0A5G2R519	A0A5G2R519_PIG	0	2658.41	2607.06	2462.19	5623.26	1905.73	7287.02	9374.48	8936.92	9985.97	9437.09	20544.9	7862.85	0	1329.73	0	1763.29	1597.36	1173.14	4869.96	4352.09	0	1066.56	1208.08	1337.55	33226.9	18654.6	12683.1	22787.6	9794.99	12634.7	3373.02	1657.12	2242.18	0	2209.88	963.174	4649.02	1362.19	5979.97	3600.37	3479.49	6501.98
AP3M1	Non-matrisome	Non-matrisome	GO:CC not extracellular matrix	A0A287AM27	A0A287AM27	A0A287AM27_PIG	0	0	0	0	1125.58	0	0	2066.42	1712.3	3321.94	2545.66	0	0	0	528.253	0	0	0	0	0	0	0	0	0	0	0	3236.67	0	0	3571.36	0	0	0	0	0	802.673	0	0	0	0	0	525.584	0
AP4B1	Non-matrisome	Non-matrisome	GO:CC not extracellular matrix	F1SBR2	F1SBR2	F1SBR2_PIG	0	1020.15	1425.33	1332.05	0	1068.9	0	0	0	1655.58	984.533	0	861.673	0	0	0	0	841.048	955.548	1572.17	1359.64	1443.91	1712.91	1028.97	1076.19	0	0	0	1812.53	984.696	0	2734.29	1784.25	1394.49	1425.98	1553.44	1257.16	2083.53	1064.77	0	1560.25	827.081	1736.6
AP4E1	Non-matrisome	Non-matrisome	GO:CC not extracellular matrix	A0A5G2RJE4	A0A5G2RJE4	A0A5G2RJE4_PIG	0	0	0	0	0	946.781	0	0	0	0	0	0	0	0	236.341	0	937.626	0	0	0	0	0	0	0	659.323	0	0	0	0	893.641	0	0	549.879	705.393	1379.42	0	2455.37	0	0	0	354.068	0	0
AP5B1	Non-matrisome	Non-matrisome	GO:CC not extracellular matrix	F1RRK6	F1RRK6	F1RRK6_PIG	0	0	0	0	700.899	0	1361.58	0	1791.89	3244.53	1880.25	3114.49	1828.9	0	0	0	0	0	0	1007.83	1297.29	0	666.573	0	444.101	7657.53	3632.62	4929.67	2491.26	2454.75	3470.03	707.541	614.661	975.935	831.114	660.003	716.083	0	0	0	1398.37	0	527.413
APAF1	Non-matrisome	Non-matrisome	GO:CC extracellular matrix (GO:0005576, GO:0005578 & GO:0031012) & GO:CC not extracellular matrix	A0A5K1TZD3	A0A5K1TZD3	A0A5K1TZD3_PIG	0	0	0	4809.75	3781.16	2591.82	10379.7	17881.2	12171.1	15326.2	15560	20304.9	16266	0	0	0	0	643.326	1265.67	5428.02	8348.82	1351.09	0	0	1350.23	24346.7	11218.7	38694.9	12257.9	10982.3	20324.7	0	2689.33	3076.19	0	2151.64	3105.1	0	1385.88	0	3639.83	1757	1442.46
APCS	Non-matrisome	Non-matrisome	GO:CC extracellular matrix (GO:0005576, GO:0005578 & GO:0031012) & GO:CC not extracellular matrix	O19063	O19063	SAMP_PIG	0	970.347	0	0	1531.29	722.774	3745.87	1953.17	3996.53	2923.27	2905.86	0	2030.22	0	231.288	0	673.919	0	0	0	0	0	325.327	1758.1	339.536	2912.52	3745	2131.5	7765.17	1686.07	3888.34	0	567.219	0	0	457.611	0	0	0	0	0	0	0
APEH	Non-matrisome	Non-matrisome	GO:CC extracellular matrix (GO:0005576, GO:0005578 & GO:0031012) & GO:CC not extracellular matrix	P19205	P19205;A0A5G2R1R6	ACPH_PIG	0	3012.55	4983.67	4906.82	4636.14	4642.42	4189.07	3540.01	3789.47	3285.69	4550.38	4472.08	3070.89	0	3949.07	9000.61	5763.92	5112.53	5227.4	0	0	0	394.742	1222.52	0	0	0	0	0	1992.48	0	0	1137.84	861.196	2116.64	1555.87	0	2911.14	3199.06	0	2052.03	1947.7	2976.44
APEX1	Non-matrisome	Non-matrisome	GO:CC not extracellular matrix	A0A4X1UV69	A0A4X1UV69	A0A4X1UV69_PIG	0	4039.52	2224.47	3039.96	6430.98	4456.19	5479.84	4658.35	5706.43	7572.7	6072.58	0	4498.01	0	4555.55	0	5473.12	3733.74	3512.63	0	0	0	0	1508.99	0	0	0	0	6289.99	2101.43	2802.94	2210.8	0	1254.86	0	3381.16	0	4212.12	4811.85	2859.54	3349.71	3657.38	3080.78
API5	Non-matrisome	Non-matrisome	GO:CC not extracellular matrix	A0A4X1SI91	A0A4X1SI91	A0A4X1SI91_PIG	0	7683.6	7566.3	6571.7	9586.73	4905.63	10649.7	12336.5	9069.17	16443.2	15245.6	23178.1	8324.1	0	4376.8	11591.9	5849.77	5811.29	4984.03	1680.44	5452.58	3025.15	3552.09	3769.41	4471.47	7374.3	2154.32	3630.79	4100.19	5303.7	0	4817.02	3813.55	3631.54	5224.48	3653.54	4278.41	3029.48	2490.19	3399.86	1899.34	2583.9	2498.56
APIP	Non-matrisome	Non-matrisome	GO:CC not extracellular matrix	A0A5G2R267	A0A5G2R267	A0A5G2R267_PIG	0	1802.55	2880.24	2177.04	1806.36	2457.9	2437.52	0	1640.6	0	0	7605.91	1263.72	0	1671.86	0	2094.96	2770.74	2342.68	1888.98	0	0	601.971	1442.61	0	0	0	0	0	1382.57	0	0	0	664.651	0	905.284	0	2227.69	923.928	0	0	1529.56	0
APMAP	Non-matrisome	Non-matrisome	GO:CC not extracellular matrix	A0A287A6K7	A0A287A6K7	A0A287A6K7_PIG	0	15789.9	12401.9	13148.1	16618.7	11493	19488.3	15525.3	16301.4	22024.9	21663.4	14505.3	14533.4	0	12078.9	8534.8	11990.1	9585.03	9187.22	26319.4	19733.3	18755	16983.2	20848.8	18826.5	23526.5	38804.4	26752.5	24344.5	33220.5	23294.4	12781.9	16091	15176.8	20294	15039.7	14305.6	12058	15239.7	11686.8	11239.7	11856	11147.4
APOA1^	Non-matrisome	Non-matrisome	GO:CC extracellular matrix (GO:0005576, GO:0005578 & GO:0031012) & GO:CC not extracellular matrix	K7GM40	K7GM40	K7GM40_PIG	0	54686.2	58375.5	128402	211750	75052.2	203407	217684	150570	188447	533542	271958	203223	0	106399	21591	176252	63187.7	78733	154899	323060	164792	320448	132783	161143	733799	418669	776868	674851	382597	352646	240387	77556.9	130332	246770	52866.3	292723	31812.4	28927.5	50283.3	32602.2	12262	22909.9
APOA1°	Non-matrisome	Non-matrisome	GO:CC extracellular matrix (GO:0005576, GO:0005578 & GO:0031012) & GO:CC not extracellular matrix	P18648	P18648;K7GM40	APOA1_PIG	0	405929	382637	446969	1065080	246192	868812	831957	704034	478827	1416100	852287	1185150	0	365733	95306.1	954987	212970	332552	742955	939394	605918	789822	353188	710425	2005450	911224	1976300	1493590	1414060	980846	830950	261160	445256	784196	156415	932692	109603	105244	137326	139719	49285.9	86732.3
APOA2	Non-matrisome	Non-matrisome	GO:CC extracellular matrix (GO:0005576, GO:0005578 & GO:0031012) & GO:CC not extracellular matrix	A0A481BCM9	A0A481BCM9	A0A481BCM9_PIG	0	8569.09	11995.5	10110.3	19618.4	10764.7	33073.2	30071	25262.9	38526.1	25070	13993.7	28930	0	8045.19	0	11007.9	17437.6	8876.48	7263.12	17011.4	7407.46	3471.83	8869.3	8567.79	25778.9	22844.1	38401	33696.2	16455.4	28547.3	11467.7	4142.28	14973.5	5324.51	7168.49	22460.1	2171.13	4419.54	6878.86	0	5619.2	4051.08
APOA4^	Non-matrisome	Non-matrisome	GO:CC extracellular matrix (GO:0005576, GO:0005578 & GO:0031012) & GO:CC not extracellular matrix	O46409	A0A287BM29;O46409	APOA4_PIG	0	27671.8	12774.2	24205.6	87977.9	9270.11	64754.7	55631	17961.4	18126.3	108707	32732.7	50951.8	0	20292.8	12060.9	61291.9	7294.16	18976.8	60143.6	29181	48886.9	71326.6	12746	46499.6	163969	38912	132367	152570	56765.7	56901.6	56644.3	11725.1	27451.4	71160.4	6575.71	60491.3	11339.4	5538.19	8157.12	8960.79	3928.58	6134.94
APOA4°	Non-matrisome	Non-matrisome	GO:CC extracellular matrix (GO:0005576, GO:0005578 & GO:0031012) & GO:CC not extracellular matrix	A0A287BM29	A0A287BM29	A0A287BM29_PIG	0	33523.1	16116.4	22613.6	126036	9934.66	62318.7	98887.8	14817	22858.4	133962	47931.6	73912.6	0	28343.9	112298	53592	6252.5	14134.2	71065.4	20951.5	45392.3	67131.7	10295.3	41074.1	195606	59659.8	209299	111625	75609	84124.5	58475.8	12551.1	29576.3	71199.6	7176.92	51182.8	12291.8	9287.92	16699.7	18548.9	0	0
APOA5	Non-matrisome	Non-matrisome	GO:CC extracellular matrix (GO:0005576, GO:0005578 & GO:0031012) & GO:CC not extracellular matrix	A0A8W4FB62	A0A8W4FB62	A0A8W4FB62_PIG	0	878.171	0	0	3801.39	0	9757.18	3380.21	0	0	8285.74	0	6205.13	0	1184.47	0	2681.03	0	0	1472.16	0	0	1065.63	0	2033.85	12673.8	0	8781.37	6507.91	2563.13	7133.71	3505.72	0	1666.77	2993.91	0	3451.31	0	0	0	0	0	0
APOB	Non-matrisome	Non-matrisome	GO:CC extracellular matrix (GO:0005576, GO:0005578 & GO:0031012) & GO:CC not extracellular matrix	A0A287AG13	A0A287AG13	A0A287AG13_PIG	0	13577.8	20689.4	20159.7	59192.5	16001.5	56876.4	49204.3	79085.3	43273.4	107829	62597.1	44982.3	0	14924	91230.6	28510.9	16085.5	13914.6	17839.2	47976.6	14650.6	23253.1	17562.7	18582.6	192843	245700	255690	122419	166158	104830	43840.6	11049.8	36579.1	23772.8	10236.6	35802.6	16074.4	12934.3	32997.3	24906.7	15780.7	11150.7
APOBEC2	Non-matrisome	Non-matrisome	GO:CC not extracellular matrix	A0A4X1SNG6	A0A4X1SNG6	A0A4X1SNG6_PIG	0	499903	435535	382815	246917	519229	201905	40785.2	90502.9	24886.5	13456.7	127047	47908.2	0	553200	133832	357218	442700	530594	162484	281118	164986	214176	376588	270508	18800.9	19870.7	11177.4	39934.7	22018.5	29098	259835	407042	336664	346945	517594	386244	408280	502091	370327	306037	341295	435236
APOC2	Non-matrisome	Non-matrisome	GO:CC extracellular matrix (GO:0005576, GO:0005578 & GO:0031012) & GO:CC not extracellular matrix	F6PSJ3	F6PSJ3	F6PSJ3_PIG	0	5214.39	5471.41	2599.61	7491.15	5378.44	13394.9	10409.4	9275.88	6626.99	20498.7	8540	16644.5	0	2343.14	10976.4	9936.31	5008.68	1990.44	6300.7	14325.5	1434.34	1593.64	5158.08	1548.8	16460.4	13604.2	12586.2	24387.8	14220.2	8729.4	8431.7	1738	3642.11	2406.86	1841.74	6792.15	903.094	982.346	0	0	1291.22	0
APOC3	Non-matrisome	Non-matrisome	GO:CC extracellular matrix (GO:0005576, GO:0005578 & GO:0031012) & GO:CC not extracellular matrix	P27917	P27917	APOC3_PIG	0	65112.4	73379.9	32767.1	140906	42834.7	225507	123145	150040	89020.8	218928	83662.5	274322	0	9455.49	34212.7	124035	37388.1	29760	140082	258123	26606	67145.9	66598.4	111566	1799850	189172	459253	389984	666676	781548	273931	55453.6	28299.9	78392.6	35441.7	184306	26492.6	31414.4	19105.5	10494.2	19197.8	16266.1
APOD	Non-matrisome	Non-matrisome	GO:CC extracellular matrix (GO:0005576, GO:0005578 & GO:0031012) & GO:CC not extracellular matrix	F1SQX9	F1SQX9	F1SQX9_PIG	0	2562.11	3200.35	4210.16	5736.03	2876.92	0	4361.8	7720.01	3161.02	10906.7	0	4138.73	0	4255.5	0	4585.89	1547.23	1725.55	9284.51	17342	4581.46	8955.59	3945.22	5800.3	14868.1	30702.2	18735.8	16518.9	15072.4	9438.1	6089.21	3700.52	4718.48	7625.68	2178.56	6462.94	0	1754.35	0	0	0	0
APOE	Non-matrisome	Non-matrisome	GO:CC extracellular matrix (GO:0005576, GO:0005578 & GO:0031012) & GO:CC not extracellular matrix	P18650	P18650;F1RM45	APOE_PIG	0	13568	15251	9663.78	42942	14108.2	49732.7	24622.4	36264.4	36547.7	65531.9	40467.1	64786.2	0	11487.6	0	31388.1	12117	10643.9	22273	42511.6	15451.2	26555.3	27175	24663.8	163072	50637.7	136547	81891.9	95453.7	65907.9	54533.5	10003.3	14450.2	28339.6	12703.7	49658.7	12980.1	12747.6	12310.1	7286.02	12833.4	16109.3
APOH	Non-matrisome	Non-matrisome	GO:CC extracellular matrix (GO:0005576, GO:0005578 & GO:0031012) & GO:CC not extracellular matrix	A0A286ZFW3	A0A286ZFW3	A0A286ZFW3_PIG	0	66519.2	81136.2	76543.6	211009	60825.5	222169	140146	278084	228228	181742	162325	237451	0	34227.3	5306.31	120156	45540.6	43149.7	69189.1	64384.8	27133.2	31500.7	33332.2	24387	76830.2	132474	128458	81601.8	75529.8	161670	79527.9	27363.6	33590	31208.7	26771.4	55092.1	41871.9	24259.7	25599.6	24144.4	8678.93	21087.3
ApoN	Non-matrisome	Non-matrisome	gene not present in GO IDs	Q68RU1	Q68RU1	Q68RU1_PIG	0	4482.07	4101.11	2561.18	7259.44	2385.7	4558.8	0	10935.7	5338.38	4620.2	4541.58	4910.39	0	4749.9	0	5683.51	0	2111.99	12651.5	11204.2	2696.7	5561.27	5603.66	9837.68	24232.8	12285.2	22487.4	23141.1	25989.7	0	14000.1	4677.41	4293.63	6934.33	2851.21	3448.74	0	1795.88	0	0	1384.84	0
APOO	Non-matrisome	Non-matrisome	GO:CC extracellular matrix (GO:0005576, GO:0005578 & GO:0031012) & GO:CC not extracellular matrix	K7GPW3	K7GPW3	K7GPW3_PIG	0	23453.1	41466.4	24629	15975.9	33361	23526.2	10803.3	13149.7	20383.1	13021	22441.1	21484.2	0	18133	69506.9	26657	29754.8	25732.8	32361.8	75232.9	48207.5	49346	51006.2	46610.7	15272.5	9333.78	27354.7	56100.3	15232.6	37102.8	46292.7	24310.9	18949.8	53994.7	23037.4	48289.3	47795.2	31206.3	57262.5	53081.5	32418	35222.5
APOOL	Non-matrisome	Non-matrisome	GO:CC extracellular matrix (GO:0005576, GO:0005578 & GO:0031012) & GO:CC not extracellular matrix	A0A5G2QZI2	A0A5G2QZI2	A0A5G2QZI2_PIG	0	12550.2	9104.8	9082.87	7752.45	12342.7	4045.44	3184.08	4885.04	3707.86	5270.2	7829.95	4095.68	0	16807.3	0	10910.3	9139.79	12710.2	7295.13	6254.67	18536.3	13604.1	16302.2	17527	5044.31	5179.06	2528.45	3153.63	4674	6184.58	14771.1	11594.8	10202.5	16169.4	13012.1	14249.2	21088.2	21362.1	46800.9	49954.7	14408.3	20786.2
APPL1	Non-matrisome	Non-matrisome	GO:CC not extracellular matrix	B5LX40	B5LX40	B5LX40_PIG	0	2995.72	4162.52	3966.46	5242.44	3825.09	5767.97	8605.75	7097.08	11343.6	10207.8	9033.07	7433.52	0	2629.75	0	3809.55	3270.67	3194.61	0	11591.9	1384.2	1237.34	2234.65	1928.26	0	7832.02	10587.7	16831.4	6651.96	6139.2	1107.68	2370.75	2149.57	0	2213.99	0	0	4101.45	0	6735.43	0	0
APPL2	Non-matrisome	Non-matrisome	GO:CC not extracellular matrix	F6Q7B0	F6Q7B0	F6Q7B0_PIG	0	1600.85	0	0	1421.55	746.285	0	1673.8	0	0	2623.14	2526.96	0	0	1385.94	0	0	0	923.427	0	0	0	0	0	0	0	0	0	0	1530.86	0	0	0	0	0	1030.78	0	0	1296.82	0	0	0	0
APRT	Non-matrisome	Non-matrisome	GO:CC extracellular matrix (GO:0005576, GO:0005578 & GO:0031012) & GO:CC not extracellular matrix	F1S6K5	F1S6K5	F1S6K5_PIG	0	10683.8	15945.6	17838.9	25569	15285.2	21784.4	23472.7	21885.2	37255.5	30284.7	75274.1	19437	0	17389.5	0	21738.8	9860.89	12844.7	0	9265.31	7108.17	7613.86	9998.13	8466.42	10441.9	0	0	0	6277.91	0	3999.23	7810.23	11164.2	9497.51	10698.1	7035.78	0	5153.15	0	0	4666.65	0
APTX	Non-matrisome	Non-matrisome	GO:CC not extracellular matrix	Q7YRZ1	A0A5G2QV47;Q7YRZ1	APTX_PIG	0	0	0	0	0	434.658	0	2176.77	0	0	1945.56	3086.48	0	0	0	0	0	0	0	0	0	0	0	0	0	0	0	0	0	0	0	0	0	0	0	0	0	0	0	0	0	0	0
AQP1	Non-matrisome	Non-matrisome	GO:CC not extracellular matrix	Q6PQZ1	A0A287AT23;Q6PQZ1	AQP1_PIG	0	992.16	0	1697.44	1643.79	1454.8	0	3397.36	0	5297.07	4221.31	0	0	0	607.97	0	0	1055.21	1781.91	0	0	0	0	0	0	0	0	4254.06	0	1707.56	0	0	0	1659.91	0	994.377	0	4742.62	9785.63	0	5614.06	3410.14	2168.92
AQP4	Non-matrisome	Non-matrisome	GO:CC extracellular matrix (GO:0005576, GO:0005578 & GO:0031012) & GO:CC not extracellular matrix	A0A287AVU9	A0A287AVU9	A0A287AVU9_PIG	0	3036.33	3177.38	2632.23	0	2300.48	0	0	0	0	0	0	0	0	793.383	0	2511.19	2721.39	2122.02	2315.7	0	0	0	0	1522.57	0	0	0	0	0	0	2466.83	3101.04	2516.61	0	2607.6	0	10728.6	4476.95	8819.01	7336.34	5563.06	16183
AQR	Non-matrisome	Non-matrisome	GO:CC not extracellular matrix	A0A4X1UIY4	A0A4X1UIY4	A0A4X1UIY4_PIG	0	1153.81	0	1354.18	1104.92	931.885	2576.98	0	0	4742.48	2390.52	3334.13	2375.57	0	0	0	0	605.849	0	0	1693.57	0	576.72	805.064	907.947	4512.58	5181.4	7196.38	2971.8	4249.02	0	0	2095.71	667.177	3962.35	3507.83	0	0	0	0	0	1188.51	0
ARAF	Non-matrisome	Non-matrisome	GO:CC not extracellular matrix	O19004	O19004	ARAF_PIG	0	1005.48	0	0	0	1354.63	0	0	0	0	0	0	0	0	1578.54	0	648.471	0	0	1948.94	0	1463.46	1952.14	1479.05	1642.93	29082.3	0	0	0	3635.43	4508.4	2100.06	1677.73	1562.76	1639.67	1568.06	1942.72	1455.31	2011.05	0	1709.67	1425.92	2308.58
ARAP1	Non-matrisome	Non-matrisome	GO:CC not extracellular matrix	A0A5G2QVJ5	A0A5G2QVJ5	A0A5G2QVJ5_PIG	0	1931.85	1791.67	1886.88	3783.81	1641.58	5698.61	10369.8	6243.52	9879.38	11601.7	6787.89	5102.36	0	941.427	0	1115.09	1208.84	0	3827.51	3113.31	987.665	1549.6	0	2475.92	22865	7759.85	14741.5	15463.1	19178.8	8486.3	0	0	1500.19	1592.07	1628.25	1236.44	0	0	0	0	1352.13	1456.63
ARAP3	Non-matrisome	Non-matrisome	GO:CC not extracellular matrix	A0A480KQN9	A0A480KQN9	A0A480KQN9_PIG	0	0	0	0	0	1148.48	2885.61	2437.64	2068.25	4250.49	3034.61	2303.06	2708.7	0	0	0	0	978.747	0	2277.59	1745.26	0	1065.44	0	1080.35	9719.32	2353.89	5239.05	4729.7	1738.26	4493.58	0	815.558	1156.7	485.237	864.35	1815.44	1671	1209.12	0	2241.09	1351.83	1164.59
ARCN1	Non-matrisome	Non-matrisome	GO:CC not extracellular matrix	A0A287AL76	A0A287AL76	A0A287AL76_PIG	0	11638.7	10623.7	8778.04	21210.7	10353.2	27338.7	29068.1	29581.4	46954.5	40173.3	31610.5	29449.2	0	5348.61	58998.9	6704.87	6768.47	6305.98	17270.3	17103.9	10707.6	11169.7	8370.67	10039.3	39711.9	14514.6	37583.9	28749.1	74319.2	26782.8	10186.5	8146.29	7993.54	12862.9	9310.83	9750.46	9243.81	6534.38	7427.24	8343.99	9233.46	8213.45
ARF1;ARF3	Non-matrisome	Non-matrisome	gene not present in GO IDs	A0A287B5T6;A0A8W4F8A7	A0A8W4F8A7;A0A287B5T6	A0A287B5T6_PIG;A0A8W4F8A7_PIG	0	9094.12	11007.1	22161.4	11193.8	14670.4	12974.2	12906.3	10332.7	14613.5	27788.8	20945.8	7918.16	0	29827.7	0	7405.3	20451.6	13261.8	14002.5	7726.08	8757.47	18985.7	22495.4	20355.5	21976.8	19905.1	35322.6	14272.8	40797.2	18026.9	22619.1	16866.1	22952.1	9844.56	24623.7	22291.9	13779.2	9000.03	19856.5	21944.6	18978.5	11101.9
ARF2	Non-matrisome	Non-matrisome	gene not present in GO IDs	A0A287BM57	A0A8W4F8A7;A0A287BM57;A0A287B5T6	A0A287BM57_PIG	0	25797.4	28532.4	36735.1	40710	26709.7	38871	22253.8	38298.3	44006.1	55900.2	38940	53068	0	25200.3	32060.3	31151	25480.3	26439.5	26888.8	22397.5	14741.3	22102.4	39510.5	31195.5	39275.6	64483.4	49529.1	36252.2	105276	45383.5	24650.7	27762.9	22746.4	28469.4	30862.1	22757.3	44145.5	47966.4	52418.2	62566.9	42221.3	46903.4
ARF4	Non-matrisome	Non-matrisome	GO:CC not extracellular matrix	A0A287A1M9	A0A287A1M9	A0A287A1M9_PIG	0	3664.64	2607.95	4487.32	7219.08	3788.11	12338.6	8861.29	7454.59	13926.9	22262.7	0	9167.4	0	2966.19	7785.91	2804.14	0	3239.84	4530.64	0	0	2756.7	4219.22	2444.92	12435.6	9778.11	5130.99	0	32736.3	11234.5	3219.37	2595.22	4544.25	0	5435.81	0	0	4039.1	0	6302.55	4603	7203.85
ARF6	Non-matrisome	Non-matrisome	GO:CC not extracellular matrix	Q007T5	Q007T5	ARF6_PIG	0	5517.04	4336.82	5432.1	12070.1	4740.84	12216.7	13861.3	15484.8	21417.7	28679.9	18009.3	23675.6	0	2090.89	12780	3853.43	3505.87	4847.94	7910.28	12839.8	3739.1	4748.31	6408.43	10021.5	28133.2	17748.3	23412.2	22512	40908	23043.4	5753.05	5404.97	4191.45	8299.43	5803.08	5922.62	10158	8026.66	11535	14232.2	7637.06	8514.92
ARFGAP2	Non-matrisome	Non-matrisome	GO:CC not extracellular matrix	A0A5K1U8N6	A0A5K1U8N6	A0A5K1U8N6_PIG	0	2073.57	0	1946.64	2348.96	2543.49	0	5708.4	0	0	7553.39	0	0	0	2217.18	0	2182.11	5054.77	2063.21	2313.16	0	2796.36	2182.47	3298.01	2561.7	0	0	5455.33	0	2644.41	0	0	1514.99	1775.14	2216.23	1636.83	1921.13	0	0	0	0	981.653	0
ARFGAP3	Non-matrisome	Non-matrisome	GO:CC not extracellular matrix	A0A5G2QES5	A0A5G2QES5	A0A5G2QES5_PIG	0	1783.17	0	0	0	2413.51	0	4419.25	2514.89	4509.57	6273.58	7344.29	5183.56	0	340.996	0	0	4691.31	2287.68	1788.4	0	1572.2	1506.54	0	2318.37	0	5498.4	5167.17	6320.42	2859.57	8308.74	0	0	2999.9	3102.94	0	2824.51	0	0	0	0	0	0
ARFGEF1	Non-matrisome	Non-matrisome	GO:CC not extracellular matrix	K7GSM4	K7GSM4	K7GSM4_PIG	0	0	0	0	0	0	1773.68	2969.12	2366.32	2373.13	4289.7	4879.06	4143.65	0	0	0	0	0	0	0	0	0	0	0	605.371	6197.01	0	9132.88	3913.4	3335.61	0	0	0	0	0	588.799	0	0	0	0	0	0	0
ARFGEF2	Non-matrisome	Non-matrisome	GO:CC not extracellular matrix	A0A5G2QXW0	A0A5G2QXW0;K7GSM4	A0A5G2QXW0_PIG	0	0	0	0	1494.86	0	1903.5	3437.94	2549.98	2570.89	2689.23	5142.15	2966.16	0	0	0	0	0	0	1379.79	1933.85	1448.4	0	0	1087.91	6095.69	0	9644.62	4504.21	5096.62	4455	0	1231.6	1449.16	1350.01	889.518	1605.43	0	0	0	0	0	0
ARFIP1	Non-matrisome	Non-matrisome	GO:CC not extracellular matrix	A0A287B8Z3	A0A287B8Z3	A0A287B8Z3_PIG	0	3297.92	14273.3	7528.44	7310.66	3080.62	9038.63	11609.3	18122.1	7707.55	15185.4	0	12189.9	0	2110.76	120060	20333.1	3968.35	3065.33	3749.84	5574.67	5120.53	2216.8	3601.57	4266.32	10818.1	0	13110.5	0	9785.08	0	3344.93	14044.8	3405.61	5724.19	2482.9	5672.8	0	3093.87	0	0	671.492	0
ARG1	Non-matrisome	Non-matrisome	GO:CC extracellular matrix (GO:0005576, GO:0005578 & GO:0031012) & GO:CC not extracellular matrix	Q95JC8	Q95JC8	ARGI1_PIG	0	0	0	0	0	0	2372.75	0	0	2437.91	0	3464.91	2563.31	0	1032.77	0	0	0	2235.39	0	0	0	0	0	1056.66	0	0	5076.63	0	1475.57	0	0	0	0	0	0	0	0	0	1848.54	0	0	0
ARHGAP1	Non-matrisome	Non-matrisome	GO:CC not extracellular matrix	A0A5G2QDJ1	A0A5G2QDJ1	A0A5G2QDJ1_PIG	0	4782.13	4331.21	3392.1	9086.66	3625.86	13668.6	12971.9	8182.83	18530	19139.3	15433.7	10585.8	0	2284.43	9418.68	3270.23	2348.99	1989.59	5931.81	7456.08	3239.12	3883.39	3705.64	2968.53	30581.1	11374.7	17701.6	17192.1	20539.3	9557.84	2885.33	2982.06	2833.66	4734.1	4022.52	3060.62	4586.49	2769.99	2869.09	3352.85	3492.75	2587.17
ARHGAP10	Non-matrisome	Non-matrisome	GO:CC not extracellular matrix	F1RS73	F1RS73	F1RS73_PIG	0	0	0	0	0	582.482	0	0	0	0	0	0	0	0	286.403	0	0	0	0	0	0	0	578.704	1247.92	0	0	0	0	0	1713.94	0	0	0	0	0	1036.71	0	0	883.5	0	0	832.706	0
ARHGAP17	Non-matrisome	Non-matrisome	GO:CC not extracellular matrix	A0A286ZZA8	A0A286ZZA8	A0A286ZZA8_PIG	0	2463.32	2247.58	1693.03	3299.97	1249.69	2014.53	3977.93	1774.08	4304.94	5538.78	3026.33	3097.25	0	1486.15	0	1712.18	1085.06	0	3237.18	1351.51	2966.28	3295.68	1619.73	2195.14	14339.1	4383.84	4741.92	3796.3	6278.59	4388.01	2540.86	1587.64	1756.9	2790.52	2045.02	1754.77	2500.58	1484.16	0	2133.5	1489.8	1376.05
ARHGAP18	Non-matrisome	Non-matrisome	GO:CC not extracellular matrix	F1S2Z5	F1S2Z5	F1S2Z5_PIG	0	779.248	0	1239.9	1507.9	941.682	357.445	0	0	0	0	0	0	0	1361.39	0	1156.47	1468.25	1197.6	0	0	0	433.233	0	0	0	0	0	0	280.768	0	0	0	0	0	348.679	0	0	0	0	0	0	0
ARHGAP24	Non-matrisome	Non-matrisome	GO:CC not extracellular matrix	F1RW15	F1RW15	F1RW15_PIG	0	0	0	0	0	770.773	0	0	2161.53	2938.22	0	0	2026.67	0	0	0	0	0	0	1358.04	0	0	1790.09	0	1266.09	7825.56	0	0	0	1517.09	0	0	1147.84	0	2045.74	0	0	0	0	0	0	0	0
ARHGAP35	Non-matrisome	Non-matrisome	GO:CC not extracellular matrix	F1RM07	F1RM07	F1RM07_PIG	0	1298.69	0	1441.06	949.273	1319.41	2731.21	2332.78	0	949.834	2775	3140.13	2561.97	0	922.566	0	0	1136.76	1429.43	0	3710.21	1095.07	1608.51	0	1348.65	0	0	1497.1	0	1991.59	0	1535.65	1923.99	1828.87	1994.53	2039.85	2189.91	2117.61	2004.79	0	2113.91	2097.37	2175.84
ARHGAP6	Non-matrisome	Non-matrisome	GO:CC not extracellular matrix	K7GN21	K7GN21	K7GN21_PIG	0	0	0	0	715.478	0	0	1309.46	0	0	1905.89	0	2318.87	0	0	0	0	0	0	797.278	0	0	0	0	0	5405.21	0	0	3307.99	804.658	3403.44	0	0	0	0	591.856	948.957	0	0	0	0	545.232	0
ARHGDIA	Non-matrisome	Non-matrisome	GO:CC not extracellular matrix	E7EI20	E7EI20	E7EI20_PIG	0	16569.7	26730.4	26597.7	29441.4	25296	22071.1	19817.5	13119.4	14602.3	23334.7	20060.8	18758.9	0	29964.3	1547.48	38944.1	27283.6	22385.2	2948.72	0	3093.56	7299.95	11221.7	5418.62	2732.85	6995.58	3300.77	0	5980.64	3554.28	2652.21	5170.52	2194.86	5832.05	8223.21	2200.65	3063.67	4739.22	0	1909.7	4178.44	3061.31
ARHGDIB	Non-matrisome	Non-matrisome	GO:CC not extracellular matrix	A0A4X1V4G4	A0A4X1V4G4	A0A4X1V4G4_PIG	0	1576.19	6349.63	5008.43	1226.2	5966.65	9107.22	2092.1	0	3025.77	0	0	5660.93	0	2024.8	0	5166.59	8707.22	3371.33	0	0	0	0	1159.75	0	0	0	0	0	0	0	0	739.408	0	0	920.78	0	0	0	0	0	0	0
ARHGEF1	Non-matrisome	Non-matrisome	GO:CC not extracellular matrix	A0A5G2QAW6	A0A5G2QAW6	A0A5G2QAW6_PIG	0	0	0	0	1237.29	711.332	898.888	2273.85	0	0	3284.31	0	0	0	491.22	0	1312.72	600.706	0	1506.04	1910.02	1561.23	1340.82	676.917	953.602	3597.37	0	0	0	3335.71	0	0	0	698.143	1288.84	356.449	0	0	0	0	0	1002.46	0
ARHGEF10L	Non-matrisome	Non-matrisome	GO:CC not extracellular matrix	A0A480QRR0	A0A480QRR0	A0A480QRR0_PIG	0	0	0	0	0	0	2381.76	0	0	0	0	0	0	0	0	0	0	0	0	0	6585.41	0	0	0	0	0	0	0	18009.1	2468.86	0	0	0	0	0	0	0	0	0	0	0	0	0
ARHGEF11	Non-matrisome	Non-matrisome	GO:CC not extracellular matrix	A0A5G2R1A0	A0A5G2R1A0	A0A5G2R1A0_PIG	0	1197.67	2967.93	1861.7	2042.59	1362.26	4007.77	4213.01	3116.53	5089.51	3068.74	5807.92	4552.83	0	1477.21	0	0	1323.49	0	3808.05	4673.76	3068.19	2327.87	2086.19	3068.64	13115.9	0	8133.68	3638	5537.88	4879.83	2026.36	2363.32	2205.13	4504.59	1911.56	3521.91	2480.34	1389.5	0	0	1668.83	3361.22
ARHGEF2	Non-matrisome	Non-matrisome	GO:CC not extracellular matrix	B2DCZ9	B2DCZ9;A0A287B6A9	ARHG2_PIG	0	1604.89	0	0	2785.74	0	2248.96	0	3098.79	4840.62	2470.84	0	2138.09	0	437.528	0	0	0	0	4238.18	0	0	0	0	0	0	0	2620.78	0	4746.48	1953.6	0	1699.65	1151.52	0	1488.54	1792.25	0	2745.77	0	0	1836.92	0
ARHGEF25	Non-matrisome	Non-matrisome	GO:CC not extracellular matrix	A0A4X1W5S2	A0A4X1W5S2	A0A4X1W5S2_PIG	0	0	0	0	0	0	0	0	0	0	0	0	0	0	0	0	0	0	0	0	0	0	0	0	0	3582.74	0	2301.7	2346.02	1495.4	3235.14	0	0	0	0	0	0	0	0	0	0	0	0
ARHGEF40	Non-matrisome	Non-matrisome	GO:CC not extracellular matrix	I3LFZ9	I3LFZ9	I3LFZ9_PIG	0	0	0	0	0	0	2536.95	2319.5	2410.14	2119.66	4508.04	3267.89	1574.98	0	0	0	0	0	0	913.642	0	0	0	0	0	11539.8	0	8069.63	7034.59	2090.63	5874.6	0	0	0	686.703	0	561.431	0	0	0	0	360.242	0
ARHGEF6	Non-matrisome	Non-matrisome	GO:CC not extracellular matrix	A0A287AH65	A0A287AH65	A0A287AH65_PIG	0	0	0	0	0	0	0	0	0	2987.14	3227.17	0	0	0	0	0	0	0	0	3167.96	3772.25	0	744.773	0	0	7541.55	4214.73	6801.01	15904.1	7551.07	3707.02	1561.12	676.635	1752.37	0	1377.35	1714.5	0	1354.85	0	3041.74	1666.95	0
ARHGEF7	Non-matrisome	Non-matrisome	GO:CC not extracellular matrix	A0A286ZPM4	A0A286ZPM4	A0A286ZPM4_PIG	0	2367.36	0	2579.45	3272.61	3887.83	7178.64	6342.78	0	5122.29	7111.99	5967.11	4352.96	0	3164.54	0	1096.82	2963.2	0	0	3901.28	2393.31	3126.46	0	2228.02	8533.95	0	0	7158.53	6271.21	4194.78	3561.16	1875.14	2465.97	4472.66	2736.89	3295.11	2669.17	1878.71	0	2988.52	2513.25	2194.7
ARID1B	Non-matrisome	Non-matrisome	GO:CC not extracellular matrix	A0A287AEF8	A0A287AEF8	A0A287AEF8_PIG	0	0	0	0	1911.94	0	1808.81	0	0	2136.43	1703.25	1725.43	2031.26	0	0	0	0	0	0	0	0	0	0	0	0	2403.68	0	0	0	957.304	0	0	0	0	0	0	0	0	0	0	0	0	0
ARIH1	Non-matrisome	Non-matrisome	GO:CC not extracellular matrix	I3LD12	I3LD12	I3LD12_PIG	0	0	0	937.961	950.397	820.915	0	0	0	0	0	0	0	0	507.555	0	0	0	0	1468.8	0	856.887	1188.28	0	582.279	0	0	0	0	1792.42	0	1489.66	1153.79	0	785.354	862.496	1706.67	0	1024.56	2387.23	2172.4	1573.99	0
ARIH2	Non-matrisome	Non-matrisome	GO:CC not extracellular matrix	A0A4X1SZT7	A0A4X1SZT7	A0A4X1SZT7_PIG	0	1217.16	0	2174.89	0	1697.56	0	0	2145.1	0	0	0	0	0	1391.74	0	0	1597.69	1252.97	2305.99	3622.01	1457.65	1603.27	1380.11	1663.29	0	0	0	0	1376.02	0	2770.85	2275.9	2534.75	1917.74	1831.04	2729.44	3319.36	1601.21	0	3029.51	1724.44	3455.47
ARL1	Non-matrisome	Non-matrisome	GO:CC not extracellular matrix	Q52NJ5	Q52NJ5	Q52NJ5_PIG	0	2620.74	4044.97	4344.01	2998.3	2225.75	7774.26	12667.4	4068.23	7871.12	15432.9	7443.91	11969	0	1173.63	0	2490.99	3153.87	2263.79	1989.11	3593.72	3735.6	2097.59	3052.26	2855.7	4906.56	15079.6	7367.45	8793.89	7363.56	13474.6	3865.1	4034.75	4998.51	2202.02	4243.7	3072.08	4160.13	4074.81	10838.7	4720.24	4346.96	6721.28
ARL2	Non-matrisome	Non-matrisome	GO:CC not extracellular matrix	A0A287B226	A0A287B226	A0A287B226_PIG	0	2758.09	0	0	2735.38	0	0	0	0	3206.53	4771.52	0	4207.71	0	2008.42	4701.13	2553.85	0	3245.74	3080.96	0	3591.09	3116.53	3583.53	4207.86	0	3094	5023	0	6260.89	6502.45	2622.51	3516.19	2378.98	2677.4	2997.55	3884.41	2421	3398.59	3944.39	4790.79	2414.68	3746.37
ARL2BP	Non-matrisome	Non-matrisome	GO:CC not extracellular matrix	A0A4X1SDE4	A0A4X1SDE4	A0A4X1SDE4_PIG	0	0	0	0	0	0	1571.04	0	0	0	0	0	0	0	0	0	0	0	0	0	2092.25	0	0	957.466	1025.89	0	0	0	0	1068.84	0	0	0	0	986.107	0	0	0	0	0	0	0	0
ARL3	Non-matrisome	Non-matrisome	GO:CC not extracellular matrix	Q52NJ4	Q52NJ4	ARL3_PIG	0	2058.22	3644.05	3901.41	4982.89	4100.24	4398.38	3426.73	0	2266.6	3950.35	3109.54	2003.52	0	2376.56	11671.7	4314.99	3454.15	3718.16	2539.08	4487.49	5039.02	4213.64	6644.84	5596.08	5499.13	2902.52	4936.56	0	6157.04	0	3354.38	3470.86	3222.8	4459.05	4076.09	5340.64	4161.83	3282.09	6061.84	3155.29	4457.76	4612.86
ARL6IP5	Non-matrisome	Non-matrisome	GO:CC not extracellular matrix	Q56P28	Q56P28	PRAF3_PIG	0	45237.7	63779.3	66791.6	37795.2	54929.2	58406.9	56470.1	0	38932.1	73791.9	57512.4	62366.9	0	63322.4	199942	39731.3	60851.5	26034	33408.4	34175.3	989.72	2901.62	8324.5	17440.5	0	35609.6	5322.61	34410.5	8889.4	25764.7	13352.2	71100.4	93964.9	9301.25	60699.8	8129.52	111212	136086	110358	88915.3	87679	114818
ARL8A	Non-matrisome	Non-matrisome	GO:CC not extracellular matrix	A0A287A2L0	A0A287A2L0	A0A287A2L0_PIG	0	7805.07	6121.95	7447.5	7750.02	5436.32	5688.4	6925.02	9172.98	16861.3	15500	5160.22	9842.71	0	5127.84	0	8184.7	4167.92	3679.35	7024.5	0	0	8617.54	7314.25	7503.78	7775.45	14493.8	13030	0	29590.9	24290.4	8056.17	6458.66	0	7804.03	0	0	9923.11	14990.9	15392.2	15698.5	13882.4	12019.8
ARL8B	Non-matrisome	Non-matrisome	GO:CC not extracellular matrix	A0A8W4FAY4	A0A8W4FAY4	A0A8W4FAY4_PIG	0	4053.31	3742.78	4369.08	5194.58	2742.05	7170.82	10295.2	6569.18	9531.86	8455.56	8080.06	6345.52	0	3416.7	12659.9	3510.73	2632.99	2987.18	5869.82	7466.34	4163.98	4659.25	5237	5907.39	12739.2	7614.16	13371	9797.62	15674.8	11600.5	6071.2	6565.51	7009.05	6591.82	5840.51	6290.17	12125.2	9543.21	11225.2	12115.3	6336.28	7057.79
ARMC1	Non-matrisome	Non-matrisome	GO:CC not extracellular matrix	F1RTB0	F1RTB0	F1RTB0_PIG	0	1090.48	0	1857.59	1255.83	2738.3	0	0	0	2433.46	3458.17	0	0	0	1392.01	0	2305.87	1893.48	1858.35	1134.09	0	1443.43	854.298	959.498	0	0	0	0	0	0	0	0	675.961	1785.31	1556.69	1286.85	2383.52	0	703.149	0	0	0	0
ARMC10	Non-matrisome	Non-matrisome	GO:CC not extracellular matrix	I3LLX9	I3LLX9	I3LLX9_PIG	0	1853.95	1210.31	1438.33	2764.94	1288.35	2856.72	3858.85	3933.89	4833.64	8778.26	2411	4059.15	0	1378.93	0	1250.94	606.981	1433.86	1845.13	0	653.418	1228.82	916.771	0	6240.66	4667.83	4530.94	4431.42	5391.85	4512.56	0	957.444	1870.24	1484.3	1354.98	1168.1	2975.63	2228.06	0	2601.4	1806.65	924.635
ARMC8	Non-matrisome	Non-matrisome	GO:CC extracellular matrix (GO:0005576, GO:0005578 & GO:0031012) & GO:CC not extracellular matrix	A0A5G2R2Y2	A0A5G2R2Y2	A0A5G2R2Y2_PIG	0	0	0	303.953	0	0	0	0	0	0	0	0	466.835	0	0	0	0	0	0	0	0	0	0	0	510.908	0	0	0	0	3060.32	0	0	758.69	712.637	0	0	791.063	0	0	0	0	0	0
ARMCX3	Non-matrisome	Non-matrisome	GO:CC not extracellular matrix	A0A287BGW5	A0A287BGW5	A0A287BGW5_PIG	0	4445.69	0	0	0	2943.23	4815.65	0	0	0	0	0	4688.02	0	2096.18	21061.6	1942.09	3075.98	0	6390.76	0	4301.91	3968.43	3709.32	3988.5	0	0	0	0	6068.82	0	7797.99	4429.2	2148.44	5191.45	6023.42	0	16471.6	8313.78	12308.4	11449.3	8968.93	11939.6
ARMH3	Non-matrisome	Non-matrisome	GO:CC not extracellular matrix	F1S8T4	F1S8T4	F1S8T4_PIG	0	1256.24	1893.52	2267.98	1231.46	1412.22	1492.61	0	1834.34	1573.45	0	0	0	0	899.259	0	1039.51	1262.99	1121.96	0	2507.75	0	513.753	850.851	888.87	2658.21	0	3249.45	0	2094.02	0	1819.22	1832.42	1520.81	1071.73	1279.21	1351.76	0	856.855	0	0	1364.57	2324.82
ARMT1	Non-matrisome	Non-matrisome	GO:CC not extracellular matrix	F1S7W3	F1S7W3	F1S7W3_PIG	0	4154.23	6784.08	5962.9	8421.53	6182.08	6342.4	0	0	0	0	0	0	0	7527.98	0	8884.72	6007.84	4456.05	0	0	0	0	996.477	0	0	0	0	0	0	0	0	0	0	0	1699.77	0	0	3157.34	0	3026.79	3389.47	0
ARPC1A	Non-matrisome	Non-matrisome	GO:CC not extracellular matrix	F1REX9	F1REX9	F1REX9_PIG	0	1849.44	2443.93	1192.47	2952.04	1765.67	0	2752.01	3923.09	5161.16	3038.66	0	1710.55	0	1176.77	0	1916.33	2102.98	1882.28	1748.51	0	1003.22	1139.15	1643.16	0	0	0	0	0	2580.06	0	0	1380.89	778.915	1307.28	1127.97	0	0	1306.64	0	0	1851.88	0
ARPC1B	Non-matrisome	Non-matrisome	GO:CC not extracellular matrix	B5APU6	B5APU6	B5APU6_PIG	0	3141.45	3441.6	3020.97	8666.23	3610.45	9407.85	15688	11658	23624.7	24855.7	13192.7	9821.82	0	974.09	0	3428.59	3445.18	2444.95	3192.5	0	0	1494.09	3291.82	2254.75	14608.6	9851.5	13224.1	12580.1	11666	5931.04	1201.96	2650.11	1514.86	2049.33	2417.23	1560.94	4046.21	1691.54	0	4381.88	2162.55	2984.85
ARPC2	Non-matrisome	Non-matrisome	GO:CC not extracellular matrix	F1SS01	F1SS01	F1SS01_PIG	0	11577.6	10666.4	14099.3	22440.7	11249.9	23935.8	27534.8	28128.3	54525.2	42271.7	31817.6	28026.2	0	6861.36	0	13361.5	8352.06	8301.82	11135.1	17027.4	6989.57	8221.41	10686.6	11180.8	43700.2	36745.1	52284.5	25903.2	47333	27743.9	5248.71	8210.28	6943.45	10235.6	9480	8362.67	3908.39	8334.39	8174.64	7083.16	10135.9	6393.74
ARPC3	Non-matrisome	Non-matrisome	GO:CC not extracellular matrix	B5APU8	B5APU8	B5APU8_PIG	0	15191	14915.6	20570.1	36639.5	23441.1	65000.2	43513.6	59661.2	108033	75645.8	107692	55073.7	0	10516.6	0	21627.5	14165.5	16301.3	28494.7	21074.2	12118.1	9749.67	17824.3	12666.9	152626	38972.9	88015.7	82077.3	82297.8	37737.1	11208.7	8745.07	10584.5	14046.4	16960.4	12272.7	12459.8	6014.07	8286.97	11261.8	13165	14552.3
ARPC5	Non-matrisome	Non-matrisome	GO:CC extracellular matrix (GO:0005576, GO:0005578 & GO:0031012) & GO:CC not extracellular matrix	A0A8X9AEQ6	A0A8X9AEQ6	A0A8X9AEQ6_PIG	0	9943.61	8236.88	10369.6	21220.7	7726.93	28919.4	34094.4	31898.1	61570.3	43229.6	26583.8	31672.3	0	5671.44	16351.9	7756.71	3358.82	4069.27	12445.8	10293.6	4602.46	4611.43	6984.91	6771.83	44435.7	24834.2	49654.7	18590.5	57411.6	30707.2	2902.89	3804.3	3529.85	7285.19	5305.3	3666.75	5210.79	2857.42	5216.29	4928.64	5627.28	4945.42
ARPC5L	Non-matrisome	Non-matrisome	GO:CC not extracellular matrix	A0A5K1VDW0	A0A5K1VDW0	A0A5K1VDW0_PIG	0	7815.87	5961.98	8002.58	7686.13	6899.43	7297.52	7828.88	8650.48	11873.4	8237.73	8616.67	11174.7	0	6828.18	22417.4	7229.54	4039.86	3498.79	10940	3249.15	6874.13	8614	9136.84	8107.96	12587.7	9015.38	10222.7	8340.06	19526.5	6196.36	3596.21	4069.19	4532.71	7091.13	6167.08	4585.99	3979.89	5103.06	9273.42	5043.95	4755.76	4819.98
ARPP19	Non-matrisome	Non-matrisome	GO:CC not extracellular matrix	Q712U6	P68211;Q712U6	ARP19_PIG	0	3763.53	10272.6	5440.11	4742.73	5953.3	3355.69	0	0	0	0	3983.01	0	0	7041.82	0	11867.3	3765.68	5577.5	0	0	0	1544.73	839.501	0	0	0	0	0	0	0	0	1119.58	0	373.323	1285.29	0	0	0	0	0	0	0
ARRB1	Non-matrisome	Non-matrisome	GO:CC not extracellular matrix	A0A286ZND1	A0A286ZND1	A0A286ZND1_PIG	0	1327.55	1587.32	1412.99	2669.51	858.724	3149.91	3308.18	3017.46	3800.33	2807.74	3127.11	3607.42	0	770.475	0	1532.4	1020.84	1112.8	1068.87	0	655.024	647.366	1476.8	1224.25	0	2568.88	0	4748.64	6200.38	5470.07	0	742.022	0	1351.34	718.949	881.19	0	1096.24	0	0	938.17	0
ARRB2	Non-matrisome	Non-matrisome	GO:CC not extracellular matrix	A0A5G2QR25	A0A5G2QR25	A0A5G2QR25_PIG	0	0	0	0	802.787	0	1364.85	0	0	0	0	0	0	0	0	0	0	0	0	0	0	0	0	0	658.129	3754.13	0	0	0	11963.8	2299.47	0	0	0	0	0	0	0	0	0	0	0	0
ARSA	Non-matrisome	Non-matrisome	GO:CC extracellular matrix (GO:0005576, GO:0005578 & GO:0031012) & GO:CC not extracellular matrix	A0A5G2QXG4	A0A5G2QXG4	A0A5G2QXG4_PIG	0	2452.75	3156.71	1936.02	5770.02	2788.38	5975.27	5227.53	6292.9	12901.8	6527.4	11928.9	6351.07	0	1987.81	0	3041.31	2065.65	2738.76	4434.01	0	0	1026.04	0	0	5909.29	8567.51	0	0	2389.17	0	0	0	0	0	1276.92	0	0	0	0	0	0	0
ARSD	Non-matrisome	Non-matrisome	GO:CC not extracellular matrix	I3LM95	I3LM95	I3LM95_PIG	0	0	0	0	2666.47	0	0	0	0	1571.43	2244.81	0	3226.79	0	535.026	0	0	0	0	2011.17	0	0	0	0	0	0	0	1187.78	0	1024.57	0	0	0	0	0	0	0	0	1195.97	0	0	0	0
ART1	Non-matrisome	Non-matrisome	GO:CC not extracellular matrix	A0A8W4FQ37	A0A8W4FQ37	A0A8W4FQ37_PIG	0	1134.73	1785.17	0	591.998	1377.05	0	0	0	0	0	0	0	0	1054.63	0	1348.7	563.966	0	0	0	0	0	0	0	0	0	0	0	0	0	0	0	0	0	629.577	0	5096.89	2524.87	4796.15	3120.36	1063.05	1648
ART3	Non-matrisome	Non-matrisome	GO:CC extracellular matrix (GO:0005576, GO:0005578 & GO:0031012) & GO:CC not extracellular matrix	A0A5K1UHA8	A0A5K1UHA8	A0A5K1UHA8_PIG	0	38133	44697	39872.5	23772.7	23085.6	15893.4	5505.21	7597.25	1917.58	1197.41	14075.8	4858.25	0	40201.8	0	61217.6	27571.9	33774.5	20386.6	10313.7	2061.29	5576.98	20151	2355.06	0	0	0	0	1236.1	0	9263.34	14271.7	10929.5	5773.52	8067.51	3755.03	16179.4	48025	11862	9445.08	10877.6	11009.9
ART4	Non-matrisome	Non-matrisome	GO:CC extracellular matrix (GO:0005576, GO:0005578 & GO:0031012) & GO:CC not extracellular matrix	A0A5G2RDM2	A0A5G2RDM2	A0A5G2RDM2_PIG	0	1578.54	0	3119.94	3922.04	1306.74	6241.97	5068.47	4037.22	5836.01	5124.92	0	5939.7	0	681.974	0	1078.46	0	0	2949.36	0	0	392.518	0	0	4996.35	4167.4	4388.66	4769.48	1810.28	5899.24	0	0	1155.6	0	0	0	0	0	0	0	830.553	0
ART5	Non-matrisome	Non-matrisome	GO:CC extracellular matrix (GO:0005576, GO:0005578 & GO:0031012) & GO:CC not extracellular matrix	F1SUY8	F1SUY8	F1SUY8_PIG	0	0	0	0	0	1247.96	0	0	0	0	0	0	0	0	5049.53	0	3213.16	2649.21	3718.19	0	0	0	0	0	0	0	0	0	0	0	0	0	0	0	0	0	0	21204.7	16197.9	18764.8	9263.22	6119.77	8779.18
ARVCF	Non-matrisome	Non-matrisome	GO:CC not extracellular matrix	A0A8X9AEP8	A0A8X9AEP8	A0A8X9AEP8_PIG	0	0	0	2523.95	0	1193.83	0	0	0	0	0	0	0	0	0	0	0	1936.56	0	2282.67	0	1351.66	2162.63	0	1859.27	0	0	2844.89	0	2140.3	0	1300.43	1546.53	1218.97	2346.16	1008.78	2835.08	3424.52	1538.62	0	2876.6	1572.43	0
AS3MT	Non-matrisome	Non-matrisome	GO:CC not extracellular matrix	A0A8D1F4P8	A0A8D1F4P8	A0A8D1F4P8_PIG	0	0	1251.99	2383.88	0	1235.45	2193.98	0	0	0	1579.96	0	2300.69	0	800.914	0	1975.73	1146.72	2009.87	0	0	0	0	0	0	0	0	0	0	0	0	0	0	765.495	0	0	0	0	0	0	0	0	0
ASAH1	Non-matrisome	Non-matrisome	GO:CC extracellular matrix (GO:0005576, GO:0005578 & GO:0031012) & GO:CC not extracellular matrix	F1SES5	F1SES5	F1SES5_PIG	0	8993.46	5561.88	4999.18	14199	5056.32	14633.3	16196	14090.2	31535.2	18513.8	34124.1	19398.4	0	5989.79	0	8688.29	2198.75	4117.28	16804.4	10415.3	8450.16	10900.3	7392.6	8308.55	71070.6	31775	61767.5	36668.2	52727.8	19937.5	10756.9	3339.49	2686.96	11089.5	3484.45	7545.66	2173.6	1417.22	1487.89	2720.28	1123.77	1908.89
ASAP2	Non-matrisome	Non-matrisome	GO:CC not extracellular matrix	A0A287B4V4	A0A287B4V4	A0A287B4V4_PIG	0	0	0	0	0	0	0	2087.98	0	0	0	0	0	0	0	0	0	1133.67	0	877.82	0	0	0	763.433	920.561	0	0	0	0	797.043	0	0	0	0	0	0	0	0	0	0	0	0	0
ASAP3	Non-matrisome	Non-matrisome	GO:CC not extracellular matrix	I3LA00	I3LA00	I3LA00_PIG	0	0	0	0	861.455	0	0	0	0	1824.09	1809.38	3810.99	1251.54	0	0	0	0	0	0	0	0	0	0	0	0	0	0	0	0	808.366	0	0	0	0	0	0	0	0	0	0	0	0	0
ASB13	Non-matrisome	Non-matrisome	GO:CC not extracellular matrix	A0A287AIT5	A0A287AIT5	A0A287AIT5_PIG	0	0	0	2592.39	0	0	0	0	0	0	0	0	0	0	399.495	0	0	433.744	1111.96	0	0	424.782	0	0	287.361	0	0	0	0	0	0	0	1426.71	946.055	0	632.887	745.984	0	0	0	0	330.919	464.03
ASB14	Non-matrisome	Non-matrisome	GO:CC not extracellular matrix	A0A287BAX4	A0A287BAX4	A0A287BAX4_PIG	0	0	0	0	0	0	0	0	0	0	0	0	0	0	0	0	0	668.523	0	0	0	1074.37	983.763	0	0	0	0	0	0	0	0	1892.34	0	0	976.463	705.186	2091.71	1703.95	1254.17	0	718.53	984.283	2570.41
ASB15	Non-matrisome	Non-matrisome	GO:CC not extracellular matrix	A0A287A0I9	A0A287A0I9	A0A287A0I9_PIG	0	0	0	0	0	0	0	0	0	0	0	0	0	0	196.738	0	0	0	0	0	0	521.763	1635.15	0	0	0	0	0	0	0	0	0	764.476	0	802.562	0	908.31	0	773.155	0	0	0	0
ASB18	Non-matrisome	Non-matrisome	GO:CC not extracellular matrix	F1SM12	F1SM12	F1SM12_PIG	0	0	0	0	0	0	0	0	0	0	0	0	0	0	583.375	0	0	1450.29	825.663	0	1413.81	1334.88	1442.87	0	0	0	0	0	0	0	0	0	352.427	0	2004.27	1138.37	1368.14	858.916	1312.78	0	804.997	882.639	1505.41
ASB2	Non-matrisome	Non-matrisome	GO:CC not extracellular matrix	A0A286ZZK0	A0A286ZZK0	A0A286ZZK0_PIG	0	529.238	0	0	0	1014.27	0	0	0	0	0	0	0	0	491.913	0	0	0	0	828.931	0	646.53	813.663	0	907.497	0	0	0	0	0	0	0	0	0	0	933.932	1447.21	0	0	0	0	0	831.133
ASCC1	Non-matrisome	Non-matrisome	GO:CC not extracellular matrix	A0A287BL96	A0A287BL96	A0A287BL96_PIG	0	0	0	0	782.069	0	1580.22	0	0	3332.57	0	2038.77	0	0	0	0	0	0	0	0	0	0	0	0	607.718	4961.27	0	3439.74	5527.33	4150.34	4000.64	0	0	0	1022.88	0	0	0	0	0	0	0	0
ASCC2	Non-matrisome	Non-matrisome	GO:CC not extracellular matrix	A0A286ZQL9	A0A286ZQL9	A0A286ZQL9_PIG	0	0	0	655.264	1181.39	0	1454.23	0	0	1304.08	1174.09	3094.38	946.241	0	0	0	0	0	0	0	0	0	0	0	378.232	1981.04	0	7181.79	0	1611.59	0	0	566.372	728.487	0	0	745.832	0	0	0	0	0	0
ASCC3	Non-matrisome	Non-matrisome	GO:CC not extracellular matrix	A0A287AF88	A0A287AF88	A0A287AF88_PIG	0	0	0	0	1362.3	0	3909.5	0	0	0	5776.17	0	2922.3	0	0	0	0	0	0	2335.46	3195.34	0	0	0	1047.07	11618.6	6394.39	11214	8322.92	9362.41	5555.22	0	0	1871.86	3464.95	1044.71	2310.8	0	0	0	0	0	0
ASH2L	Non-matrisome	Non-matrisome	GO:CC not extracellular matrix	A0A4X1VQD7	A0A4X1VQD7	A0A4X1VQD7_PIG	0	2459.47	1633.59	1796.04	2960	2489.86	5711.58	4407.31	5462.59	9769.03	6739.63	14771.4	3686.38	0	1789.68	0	1278.05	1835.48	1512.07	3494.05	2767.59	3432.47	3324.05	3316.72	3033.77	12650.8	0	5842.08	3297.25	3974.14	3058.83	0	2081.68	1453.99	2319.24	2477.67	2070.57	0	0	0	0	1444.89	0
ASL	Non-matrisome	Non-matrisome	GO:CC not extracellular matrix	F1RJH8	F1RJH8	F1RJH8_PIG	0	936.225	0	1897.02	2172.1	1453.73	1966.08	0	1258.51	1662.65	2295.32	0	2017.45	0	976.768	0	2853.8	0	0	0	0	0	543.525	0	0	0	0	0	0	0	0	0	0	0	0	0	0	0	0	0	0	0	0
ASPA	Non-matrisome	Non-matrisome	GO:CC not extracellular matrix	B1PK17	A0A287ACM9;B1PK17	ACY2_PIG	0	696.793	1276.43	1289.18	1235.64	1335.67	0	0	0	0	1968.3	0	0	0	1470.53	0	1449.67	1042.74	0	0	0	0	0	0	0	0	0	0	0	0	0	0	0	0	0	0	0	0	0	0	0	0	0
ASPH	Non-matrisome	Non-matrisome	GO:CC not extracellular matrix	A0A287AT82	A0A287AT82	A0A287AT82_PIG	0	4774.01	4423.04	4230.27	8789.64	3382.96	17403	15378	13015.1	14273.5	23438	18625.2	17165.9	0	2738.26	9728.16	3333.45	2075.65	2552.04	5818.73	8037.06	2142.74	2039.33	2830.04	2316.23	12649.4	12134.4	12765	7453.03	12116.8	13662	3394.83	2923.81	4913.73	3412.34	4619.03	2519.47	3045.14	1894.63	10739	7395.4	2474.01	3437.73
ASPN	Core matrisome	Proteoglycans	GO:CC extracellular matrix (GO:0005576, GO:0005578 & GO:0031012) & GO:CC not extracellular matrix	F1SUE4	F1SUE4	F1SUE4_PIG	0	204804	197976	131755	746588	145054	812614	1041270	1370350	1484720	1644560	951034	885890	0	54756.9	52873.3	183727	37004.4	49980.6	991836	1085640	90221.2	226565	157652	80462.4	3217140	3758730	4169670	3378110	1811080	3839030	107207	106825	119009	332012	113048	106452	942736	1083060	3400210	1593420	1045970	433947
ASPSCR1	Non-matrisome	Non-matrisome	GO:CC not extracellular matrix	A0A287BCG1	A0A287BCG1	A0A287BCG1_PIG	0	2689.24	5687.7	3585.23	0	3805.24	4393.95	4787.22	2599.73	2222.06	0	4087.23	2738.07	0	1905.79	0	3326.57	4226.23	2666.94	1367.73	2379.43	1125.49	1204.46	1635.23	1973.32	3268.99	0	4178.44	0	4355.07	0	1833.77	2220.7	2363.57	1707.88	1506.13	3088.34	2408.45	2143.58	0	2427.96	2961.77	3449.29
ASRGL1	Non-matrisome	Non-matrisome	GO:CC not extracellular matrix	A0A287AUX9	A0A287AUX9	A0A287AUX9_PIG	0	1237.63	1864.31	1500.04	1797.7	1815.06	2460.81	2991.12	1181.16	3180.54	1952.56	3627.73	2268.56	0	987.594	0	2056.56	1769.74	1662.32	1052.49	0	443.685	715.325	1390.86	0	0	0	0	0	2117.52	0	0	0	621.19	861.935	927.606	0	0	0	0	0	0	0
ASS1	Non-matrisome	Non-matrisome	GO:CC not extracellular matrix	A0A287A9G4	A0A287A9G4	A0A287A9G4_PIG	0	1572.26	3486.7	3870.31	3084.09	3127.82	10234.1	1476.14	2969.38	2976.34	3260.14	9998.13	2770.17	0	1806.58	0	1142.93	1733.62	3795.87	3913.62	5287.35	2650.47	4029	2846.34	9252.16	14096.1	2882.64	27758.9	3439.93	4301.37	6871.66	2051.5	2976.01	3838.42	3051.07	1716.46	5712.59	0	3024.3	0	2558.24	3251.36	2218.08
ATAD1	Non-matrisome	Non-matrisome	GO:CC not extracellular matrix	A0A4X1V6Z6	A0A4X1V6Z6	A0A4X1V6Z6_PIG	0	5664.52	13687.1	16253.9	4391.71	9163.91	12012.4	9142.72	1464.05	7835.66	3661.47	9307	3226.73	0	8036.78	0	8549.06	11883.2	5544.55	11239.6	24406.8	12096.2	12847.4	10027.8	12008.6	17091.5	0	5098.88	10973.4	14226.2	11954.3	11954.4	13710	15992.6	7317.2	9066.98	16351.9	17754.4	14438.1	23380.8	13094.3	16777.2	11726.4
ATAD3A	Non-matrisome	Non-matrisome	GO:CC not extracellular matrix	F1RJE4	F1RJE4	F1RJE4_PIG	0	6513.15	8826.96	7478.53	7584.06	8195.66	16671.1	12682.3	9484.7	10700.5	12230	13418.9	13982.8	0	6207.14	0	9450.09	9304.44	8724.74	12399.6	22018.6	12714.5	12893.8	12194.7	9943.61	15764.7	9735.36	13385.9	10950.3	16016.3	23569.9	8304.43	7991.08	8321.63	9897.7	6985.82	6733.39	9343.35	10060	11417.6	10917.5	6991.99	8874.87
ATAT1	Non-matrisome	Non-matrisome	GO:CC not extracellular matrix	Q767K7	I3L925;Q767K7	ATAT_PIG	0	0	0	0	0	0	0	0	0	0	0	0	0	0	0	0	0	0	0	0	0	0	0	0	516.779	0	0	0	0	0	0	0	703.776	662.889	0	468.775	411.057	0	421.389	0	0	385.489	0
ATE1	Non-matrisome	Non-matrisome	GO:CC not extracellular matrix	A0A287BP37	A0A287BP37	A0A287BP37_PIG	0	1717.22	2521.06	2540.16	2238.06	2054.18	1934.43	3446.28	1780.89	2230.69	3098.62	4388.77	1561.67	0	995.51	0	1828.25	2238.21	1313.61	1459.91	3618.58	1071.39	1431.95	1535.51	1341.95	3585.18	899.557	866.932	2707.77	1163.57	0	2074.34	1858.49	2729.01	1909.35	1800.65	1970.84	1596.81	471.236	0	1492.54	1430.02	1635.47
ATG12	Non-matrisome	Non-matrisome	GO:CC not extracellular matrix	D7RA34	D7RA34	D7RA34_PIG	0	0	0	666.905	1236.35	0	0	0	1941.94	2042.29	0	0	0	0	0	0	694.993	0	553.448	0	0	645.301	747.316	1155.51	1048.32	0	0	0	0	2801.6	0	0	790.99	0	1146.4	736.511	0	0	0	0	0	931.06	0
ATG16L1	Non-matrisome	Non-matrisome	GO:CC not extracellular matrix	F1SM42	F1SM42	F1SM42_PIG	0	0	0	0	0	0	0	0	0	0	0	0	0	0	335.379	0	0	1179.04	1722.41	0	0	0	0	0	362.23	0	0	0	0	0	0	0	0	0	0	0	0	0	0	0	0	0	0
ATG2B	Non-matrisome	Non-matrisome	GO:CC not extracellular matrix	A0A287BFM0	A0A287BFM0	A0A287BFM0_PIG	0	0	0	0	0	0	0	0	0	0	0	0	0	0	0	0	0	0	0	1286.11	1345.97	897.305	956.204	5185.78	0	0	0	0	0	1412.55	0	0	0	0	0	0	0	0	0	0	0	0	0
ATG3	Non-matrisome	Non-matrisome	GO:CC not extracellular matrix	A0A4X1SU02	A0A4X1SU02	A0A4X1SU02_PIG	0	4634.17	13630	10927.5	7579.16	6503.86	19562.7	8779.3	14388.9	9043.71	11144	9947	22310	0	1751.27	0	3931.54	4239.06	1879.4	14641.5	28902	8357.83	9267.91	8229.46	12644.4	35958.9	10036	23525.7	41634.5	43989.8	20824.2	11317.1	7634.95	9850.87	13954.3	7796.52	21980.6	3044.12	1990.55	0	2476.22	4518.4	2824.6
ATG4B	Non-matrisome	Non-matrisome	GO:CC not extracellular matrix	A0A5G2Q8U4	A0A5G2Q8U4	A0A5G2Q8U4_PIG	0	0	0	0	0	0	0	0	0	0	0	0	0	0	0	0	0	574.603	0	0	0	0	0	0	884.396	0	0	0	0	2152.69	0	0	0	1256.63	1032.71	614.329	787.055	0	509.67	0	0	1488.18	0
ATG7	Non-matrisome	Non-matrisome	GO:CC extracellular matrix (GO:0005576, GO:0005578 & GO:0031012) & GO:CC not extracellular matrix	A0A287BS20	A0A287BS20	A0A287BS20_PIG	0	2329.32	3478.16	2965.67	4356.62	2336.24	4018.72	3954.35	3312.09	6291.96	5213.3	7529.8	6442.73	0	2195.86	0	3114.86	2776.58	1176.37	2460.98	3871.14	965.462	1065.36	1109.63	880.044	11863.9	0	6588.94	7751.97	5847.9	3347.68	744.031	1825.45	2608.18	0	1961.61	882.954	1568.32	1149.58	0	0	1400.46	1162.49
ATG9A	Non-matrisome	Non-matrisome	GO:CC not extracellular matrix	A0A480SYV2	A0A480SYV2	A0A480SYV2_PIG	0	1325.96	1534.5	1454.61	1585.91	896.481	2108.42	1382.69	0	1310.95	1807.21	0	1296.5	0	0	0	0	755.029	0	1533.1	1819.62	0	0	0	1094.19	4654.26	5374.61	0	4237.55	1305.48	2630.32	1899.42	2040.74	3110.36	0	2357.89	0	5708.84	3861.72	6750.76	6893.69	4179.13	6163.86
ATIC	Non-matrisome	Non-matrisome	GO:CC not extracellular matrix	B3VMR0	B3VMR0	B3VMR0_PIG	0	1761.48	0	0	3549.44	1793.51	0	0	0	0	5725.69	0	0	0	1916.42	0	2798.5	2294.28	2556.99	0	0	0	1056.42	0	1890.66	0	0	0	0	0	0	0	0	1603.92	0	1055.39	0	0	1357.1	0	0	1509.16	0
ATL2	Non-matrisome	Non-matrisome	GO:CC not extracellular matrix	A0A287AWD2	A0A287AWD2	A0A287AWD2_PIG	0	24186.8	12414.3	18187.2	6654.81	9106.27	16702.5	7492.39	8518.78	12547.9	12740.5	12413.2	13862.8	0	7207.68	0	10459.7	7981.52	9590.82	10975.4	18688.3	12697.5	15806.8	8984.52	12535.2	25438.4	17968.3	44703.1	8781.66	14813.5	35963.4	23381.7	25014.5	26472.1	21066.6	19584.7	26888.6	43248.8	40197.5	54779.2	54027.5	25415.2	34016.5
ATL3	Non-matrisome	Non-matrisome	GO:CC not extracellular matrix	A0A5G2QCA3	A0A5G2QCA3	A0A5G2QCA3_PIG	0	9493.16	11728	12418.1	13159.5	8362.15	44765.5	23318.6	26168.9	40201.5	58973.2	41872.2	31199.7	0	3999.57	0	4163.41	6958.15	5721.49	25770.7	31033.5	7944.05	10080.3	9594.16	12790.4	158191	87324.9	251445	68078.8	90658.6	186295	4761.81	8203.33	8961.35	19932.2	8184.12	9664.72	12490.6	5840.49	9750.64	8083.88	8097.6	5997.15
ATM	Non-matrisome	Non-matrisome	GO:CC not extracellular matrix	Q6PQD5	F1SV20;Q6PQD5	ATM_PIG	0	0	0	0	0	0	0	4799.8	1907.59	0	0	0	0	0	0	0	0	0	0	1503.11	1994.11	0	0	0	0	15121.1	0	851.381	6236.57	2973.72	0	0	0	0	0	0	0	0	0	0	0	0	0
ATOX1	Non-matrisome	Non-matrisome	GO:CC not extracellular matrix	D0G0C7	D0G0C7	D0G0C7_PIG	0	1887.1	2926.84	3389.41	3721.15	3387.77	2267.09	6263.36	0	1335.92	0	0	2609.53	0	3918.45	0	5598.54	3271.25	3962.99	0	0	0	0	0	0	0	0	0	0	0	0	0	0	0	0	0	0	0	0	0	0	0	0
ATP11A	Non-matrisome	Non-matrisome	GO:CC not extracellular matrix	A0A287B7D1	A0A287B7D1	A0A287B7D1_PIG	0	0	0	1232.57	1187.43	0	1367.46	0	0	0	3187.41	0	0	0	0	0	0	0	0	0	0	0	1277.26	0	0	4727.02	1814.32	4912.34	0	1788.03	2956.84	0	0	908.136	0	0	0	0	1273.86	0	1660.95	1430.47	0
ATP13A1	Non-matrisome	Non-matrisome	GO:CC not extracellular matrix	A0A5G2Q8V3	A0A5G2Q8V3	A0A5G2Q8V3_PIG	0	0	0	0	1852.56	0	1501.51	0	0	4771.94	2887.92	0	2552.42	0	0	0	0	0	0	2720.64	0	0	0	0	0	0	0	0	0	2255.44	0	1191.43	1964.59	2006.67	0	2383.05	0	3561.31	3505.11	3130.27	3827.74	2429.07	2775.37
ATP1A1^	Non-matrisome	Non-matrisome	GO:CC not extracellular matrix	P05024	A0A4X1SUR0;P05024	AT1A1_PIG	0	7795.39	5532.85	5894.97	10450.3	4392.56	8240.09	12402.5	9800.75	13269.6	16612.7	5925.59	8970.26	0	6041.73	12919.8	4307.16	5028.32	5319.17	4925.49	5315.54	0	1550.83	0	1548.13	12542.5	13837.9	9855.65	10291.8	6878.63	9707.15	4116.61	4966.3	6054.42	2461.46	4211.78	2025.95	5917.7	7155.53	7165.69	6967.47	3942.48	4666.76
ATP1A2	Non-matrisome	Non-matrisome	GO:CC not extracellular matrix	D2WKD8	D2WKD8	AT1A2_PIG	0	24203.9	18537.6	18164.1	13028.6	18205.1	10937.1	17588.3	13354.5	16956.9	19702.9	16360.7	8689.87	3638790	30331.5	20202.7	11001.3	22109.6	24274	12370.7	9004.44	2650.79	6579.31	3252.3	7802	5316.44	11058.6	10680.4	13424.3	5130.99	17293.2	15406.3	17914.1	20740.2	6435.32	18718.8	10689	31365.8	29406.3	30219.4	38838	25259.7	29057
ATP1B1	Non-matrisome	Non-matrisome	GO:CC not extracellular matrix	P05027	P05027	AT1B1_PIG	0	45412.5	26391	28485.1	20456	30293.8	15678.3	9158.46	14761.7	10704.8	13055.5	12969.2	10203.5	0	32085.6	0	24925.9	30096.3	35195.2	32495.3	18672.3	21526.5	24229.1	29433.9	34422.8	0	0	0	17689.2	2389.03	0	34006.1	29661.6	29624.8	31971.4	22585.1	23213.9	34279.4	41571.4	13873.9	37817.5	26741.5	48713.4
ATP1B3	Non-matrisome	Non-matrisome	GO:CC not extracellular matrix	A0A287B5A2	A0A287AXL4;A0A287B5A2	A0A287B5A2_PIG	0	6040.72	2912.4	3426.48	11877.4	2904.13	8906.35	9189.13	14715.5	19203.2	13775.1	6588.73	25332.6	0	2181.9	0	3258.89	2247.87	1597.54	3922.6	5307.53	0	0	0	0	15301.5	13325.9	17169	10551.2	22599.1	13742.9	1772.47	1184.39	1932.63	0	2100.48	0	4078.87	4070.87	0	2962.94	2747.56	2090.39
ATP1B4	Non-matrisome	Non-matrisome	GO:CC not extracellular matrix	Q9BDK6	Q9BDK6	AT1B4_PIG	0	3777.39	0	4070.75	2665.92	3575.06	0	0	0	0	0	0	0	0	2166.09	8626.05	3164.26	0	4125.88	2478.17	0	0	1709.04	3938.28	1623.02	0	0	0	0	0	0	3393.35	4149.45	4725.8	0	4704.68	0	4190.46	4216.99	4098.11	4962.44	6011.86	4990.18
ATP2A1	Non-matrisome	Non-matrisome	GO:CC not extracellular matrix	A0A287APK5	A0A287APK5	A0A287APK5_PIG	0	900757	604999	731508	252704	513139	163488	25137.7	91561	18380.6	23316	162610	122179	75571800	637258	363526	243313	584323	586977	375424	217329	69239.3	200411	80720.8	248732	36077.7	103793	19632.6	142312	44131.1	218956	735829	1025010	977655	119892	741849	269349	1593670	1427040	1370260	1375480	1070190	780974
ATP2A2	Non-matrisome	Non-matrisome	GO:CC not extracellular matrix	P11607	P11607	AT2A2_PIG	0	305473	281922	310208	146689	206045	143352	27516.9	61736.5	20251.2	31413.4	103295	83172	59262400	265970	83234.9	203637	309464	216110	383339	142049	70223.3	171413	66771.1	269793	45655.2	122847	23959.3	137670	56366.7	208862	633936	754107	746269	181578	694416	208756	1750010	1697010	1622630	2628460	1123310	1482680
ATP2A3	Non-matrisome	Non-matrisome	GO:CC not extracellular matrix	O77696	O77696	AT2A3_PIG	0	153631	0	22074.8	0	0	0	0	0	0	0	17253.9	0	0	181150	0	15422.1	0	9720.5	16212.6	34604.9	6130.36	21189.2	27813.5	0	0	0	0	0	4428.92	0	0	163245	338301	24858.2	133878	125997	236414	344844	20203.4	275161	65748.1	12227.8
ATP2B1^	Non-matrisome	Non-matrisome	GO:CC not extracellular matrix	P23220	F1SPZ4;P23220;A0A287APC7	AT2B1_PIG	0	5923.5	2513.48	4022.91	5996.4	3295.83	5721.28	9734.23	8440.74	11091.1	13257.9	5977.32	7568.01	0	4931.62	8085.99	3197.57	2383.04	2872.45	3424.37	0	0	1583.06	0	2891.89	1000.88	12178.2	5046.06	0	4260.81	7709.72	2370.86	2923.48	3881.04	1890.22	2718.34	2021.23	4166.85	4936.9	3512.07	7144.77	3554.92	2281.96
ATP2B4	Non-matrisome	Non-matrisome	GO:CC not extracellular matrix	A0A287APC7	A0A287APC7	A0A287APC7_PIG	0	2686.14	2661.11	3103.8	4487.85	2324.88	5251.82	12287.1	7278.81	10815.1	17750.4	4810.05	6116.29	0	1250.39	7172.31	1754.52	1694.89	2302.84	1623.86	0	0	0	0	0	7072	16887.7	5778.07	0	3590.2	0	1619.45	1195.8	2190.58	0	1769.96	0	0	1275.77	0	1202.78	1597.47	0
ATP5F1A	Non-matrisome	Non-matrisome	GO:CC not extracellular matrix	P80021	P80021	ATPA_PIG	0	1056570	834926	868117	441670	1189100	438707	164968	259281	248176	205124	424805	280019	45916500	703440	592468	881281	932954	1109960	1506210	983620	1686640	1314670	1416210	1530200	255311	164375	146803	451149	240951	318534	1019600	1035100	954050	1484710	1063090	1230640	718829	731258	739897	685658	870688	918044
ATP5F1B	Non-matrisome	Non-matrisome	GO:CC not extracellular matrix	K7GLT8	K7GLT8;A0A8W4FN03	K7GLT8_PIG	0	2429190	1750970	1856910	1059320	2269050	1110270	353966	495397	397730	392334	836725	582606	0	1643710	656973	2312600	2075690	2333980	2693750	2117370	3283640	2752890	3228650	2731180	311373	296720	366712	757080	434508	701424	1776570	1812390	1974940	3420160	2159070	2933050	771521	858862	789436	715511	1555180	1092540
ATP5F1C	Non-matrisome	Non-matrisome	GO:CC not extracellular matrix	A0A8X9AEI6	A0A8X9AEI6	A0A8X9AEI6_PIG	0	297151	201178	266693	131631	381296	165508	66759.5	66156	68816.4	83988.5	129465	92581.6	54929100	268691	78658.7	365608	283086	327703	473921	407416	588140	583572	497913	529670	85835	92865.4	106235	208784	103401	164405	448508	352600	406565	647135	392927	539364	335018	256321	330570	337605	447801	312720
ATP5F1D	Non-matrisome	Non-matrisome	GO:CC not extracellular matrix	A0A8D1AXG3	A0A8D1AXG3	A0A8D1AXG3_PIG	0	151409	201269	143306	78828.6	177880	71468.6	25485.5	49394.8	39559.2	29952.6	78036.2	69278.7	0	269412	66658	191315	147954	211677	138291	90703.1	119871	114756	152643	142934	8709.48	12820.3	0	24897.8	20464	13336	28502.6	105429	75295.4	129661	97859.4	87353.1	40926.3	89494.5	20926.6	26923.1	66576	42214.7
ATP5IF1	Non-matrisome	Non-matrisome	GO:CC not extracellular matrix	Q29307	Q29307	ATIF1_PIG	0	7766.35	6615.82	6147.69	5884.44	15311.2	0	0	0	0	0	0	2502.55	0	14142.9	0	22418.3	11598.1	13771.9	0	0	0	998.292	0	0	0	0	0	0	0	0	0	0	0	0	0	0	0	0	0	0	0	0
ATP5ME	Non-matrisome	Non-matrisome	GO:CC not extracellular matrix	Q9MYT8	Q9MYT8	ATP5I_PIG	0	161196	135647	129533	67097.2	183765	76235.5	29831.4	46783.5	33581.7	25847.2	58293.7	66433.9	15056400	93846	36586.4	173293	177564	179577	282574	135273	331352	308476	280223	357278	39387.6	34817.7	37937.4	93993.4	73204.3	102020	176650	138078	113769	321493	142984	239876	188988	289143	305835	266718	271193	301571
ATP5MF	Non-matrisome	Non-matrisome	GO:CC not extracellular matrix	Q95339	Q95339	ATPK_PIG	0	934650	633457	556274	447064	704366	296326	119452	190498	111356	178101	266111	226734	0	437105	579526	771750	664584	744478	1006900	546175	1112990	1029580	1002220	1075880	123888	145533	97156	204377	173869	240428	1412000	992401	848576	1265730	1047960	784742	2146550	1765220	2586870	3386270	1218710	1910350
ATP5MG	Non-matrisome	Non-matrisome	GO:CC not extracellular matrix	A0A287A725	A0A287A725	A0A287A725_PIG	0	38435.7	77605.9	118978	29133.1	121916	68034.2	28728.1	41442.6	33933.1	46624.1	74509.7	54915.6	14988200	74804.8	61817.1	145226	127229	156619	293797	204670	301028	419184	312020	508817	27354.3	44176.3	49672.2	156478	32206	114188	267268	123788	139403	475213	110347	325908	184817	158803	275037	233629	223797	239959
ATP5MK	Non-matrisome	Non-matrisome	GO:CC not extracellular matrix	A0A4X1TQQ5	A0A4X1TQQ5	A0A4X1TQQ5_PIG	0	49905.6	28182.8	39200.6	31461.3	47071.4	17060.1	10870.4	12198.1	7370.94	9679.91	21923.3	13101.3	0	51394.4	0	32747.9	38378.9	45250.5	31249.6	16887.8	29051	29708.2	31566.7	31367.7	8213.46	16268	10272	17190.9	13669.6	21745.4	43246.8	43845.5	34982.2	37786.4	35615.4	23174.3	164626	100719	231826	211183	98558.2	139775
ATP5PB	Non-matrisome	Non-matrisome	GO:CC not extracellular matrix	A0A8D0MI69	A0A8D0MI69	A0A8D0MI69_PIG	0	662410	511893	533046	285551	530912	423897	119400	179747	179693	179350	290318	232341	0	420440	159120	495445	665750	707199	467419	668236	632012	377078	635104	916081	250990	169843	212181	440960	197065	437335	609667	496830	535568	925628	434029	437849	1096100	989518	1219450	1694720	741043	1212440
ATP5PD	Non-matrisome	Non-matrisome	GO:CC not extracellular matrix	A0A4X1V4B4	A0A4X1V4B4	A0A4X1V4B4_PIG	0	408672	406275	356501	173086	421891	121331	63918.3	110950	91625.2	97854.5	189408	133338	0	461273	122694	399495	474507	458785	434301	314524	332406	298185	392338	342596	114498	34682.6	59452.3	156071	71217	57673.8	164987	225611	269113	379598	265382	218062	265643	296829	183818	235893	288440	324400
ATP5PF	Non-matrisome	Non-matrisome	GO:CC not extracellular matrix	P13618	A0A4X1UAD7;P13618	ATP5J_PIG	0	159337	80316.5	84498.2	35586	109955	29600.2	9244.33	24994.9	11388.2	10527.8	16997.1	25520.4	32426200	205610	205411	148131	77077.4	100687	73946	8051.57	0	18635.3	18560.1	7681.65	0	0	0	0	3926.37	0	3619.32	14103.5	19463.2	17501.3	11734.3	2611.64	3635.01	6898.14	5201.92	3715.71	3750.43	5301.01
ATP5PO	Non-matrisome	Non-matrisome	GO:CC not extracellular matrix	Q2EN81	A0A2C9F3A3;Q2EN81	ATPO_PIG	0	450383	274563	403393	213613	620339	238505	87416.2	124854	85607.9	108383	248507	131558	47262100	605823	191712	450450	606799	554075	497427	207610	556281	465564	436376	577294	64984.7	89950.8	96948.5	102463	92021.5	126691	292819	308975	488826	430373	307812	389889	171976	206463	240885	188697	335005	238451
ATP6V0A1	Non-matrisome	Non-matrisome	GO:CC not extracellular matrix	F1S1D6	F1S1D6	F1S1D6_PIG	0	1414.9	0	0	1058.27	0	2226.51	4078.61	3263.56	1730.76	5443.57	0	2726.62	0	0	0	0	0	0	1467.39	4088.68	0	0	0	0	9618.72	6981.79	7633.69	7347.61	3936.32	6877.16	1025.15	1531.05	1209.8	0	1086.94	0	3058.21	2426.94	4921.33	3097.71	1163.03	3209.43
ATP6V0D1	Non-matrisome	Non-matrisome	GO:CC not extracellular matrix	A0A5G2QDQ1	A0A5G2QDQ1	A0A5G2QDQ1_PIG	0	2052.07	1562.61	2131.71	3720.99	0	3792.16	5560.31	4812.55	4883.04	4666.79	4415.22	0	0	1417.39	0	0	0	0	2587.24	3100.41	0	1774.92	1003.49	1151.95	11917.8	0	6921.16	10777.5	8463.89	10054.8	0	1422.41	1143.7	0	1758.04	0	0	0	0	4552.02	0	0
ATP6V1A^	Non-matrisome	Non-matrisome	GO:CC not extracellular matrix	Q29048	A0A4X1SXY5;Q29048	VATA_PIG	0	2346.06	0	2873.09	3829.35	2506.88	5518.37	5254.82	3716.28	7108.01	6149.99	5391.85	2978.38	0	2057.46	0	2325.45	2108.98	2047.39	2937.29	3513.54	2223.85	2376.42	2452.54	2097.89	7051.49	2978.28	5726.83	5538.84	8386.72	3686.34	3249.85	1559.09	2413.35	2740.74	2162.06	3823.4	2598.74	2063.08	0	934.883	2986.41	1844.94
ATP6V1A°	Non-matrisome	Non-matrisome	GO:CC not extracellular matrix	A0A4X1SXY5	A0A4X1SXY5	A0A4X1SXY5_PIG	0	7746.88	12578.2	9828.64	13424.9	7384.36	16104.6	15416.3	14926.7	10587.4	12758.7	31396.9	13012	0	4446.57	0	10222.7	10136.1	6774.18	8142.4	11511.6	4012.58	5211.32	5218.59	7230.2	17859.7	0	7823.27	0	8963.4	4726.1	4131.09	4326.55	4896.19	3876.69	5800.33	5276.06	7960.21	3763.04	4405.36	4593.92	5812.9	6001.08
ATP6V1B2	Non-matrisome	Non-matrisome	GO:CC not extracellular matrix	A0A4X1VDG8	A0A4X1VDG8	A0A4X1VDG8_PIG	0	5039.67	10332.3	7674.27	7181.11	5496.29	13958	9069.62	10171.9	11109.5	12637.3	20802.2	9777	0	3168.14	13485.8	5837.7	5180.67	4633.44	2998.97	7429.23	2814.02	2847.6	4444.21	3706.97	14498.8	3684.01	6640.12	0	7312.76	0	2591.07	2664.11	3566.18	5478.56	4274.64	4193.52	3193.05	2358.8	0	1185.25	3546.27	3138.01
ATP6V1C1	Non-matrisome	Non-matrisome	GO:CC not extracellular matrix	A0A287AXI2	A0A287AXI2	A0A287AXI2_PIG	0	3961.44	2174.54	3816.91	5438.75	3934.48	4261.35	4015.74	6510.21	11628	4225.2	10819.2	4798.42	0	4150.61	0	2466.66	4704.12	5672.89	0	2640.55	3897.4	2526.81	2431.41	5539.3	0	0	5574.08	0	4878.38	0	10480.5	2917.54	17004.2	3576.87	9541.63	3929.09	0	15454.1	0	18180.6	2907.61	0
ATP6V1E1	Non-matrisome	Non-matrisome	GO:CC not extracellular matrix	K9J4U3	K9J4U3	K9J4U3_PIG	0	2854.52	0	2635.37	2837.71	1913.79	0	0	0	0	5809.54	0	7389.23	0	1672.91	0	2303.02	3100.95	2567.36	4174.95	0	1147.91	1601.03	2151.83	2418.22	21298.2	0	0	0	4951.22	0	0	0	0	0	1964.62	0	0	1477.01	0	2252.8	1939.9	1820.56
ATP6V1F	Non-matrisome	Non-matrisome	GO:CC not extracellular matrix	A0A8D1H0W9	A0A8D1H0W9	A0A8D1H0W9_PIG	0	3740.3	4138.31	9163.35	5298.39	6260.32	8301.39	6055.87	4575.2	8617.11	6665.45	14076.6	8872.33	0	3576.52	8464.31	7674.46	4052.82	7192.86	7293.58	8668.04	5197.46	6773.63	7372.27	5881.15	9676.57	0	10952.4	5109.48	8106.39	2644.57	5499.93	3686.56	4621.21	6539.14	4942.71	5844.2	2050.96	2799.21	2141.16	2016.76	3812.34	8200.58
ATP6V1H	Non-matrisome	Non-matrisome	GO:CC not extracellular matrix	Q9TVC1	F1RSG6;Q9TVC1	VATH_PIG	0	0	0	0	1941.62	1026.7	1347	1482.88	0	0	0	0	0	0	721.211	0	0	1062.52	0	0	0	0	0	0	0	0	0	6790.84	2820.75	3184.62	0	0	870.137	1310	1360.76	772.263	0	0	0	0	0	756.8	0
ATP8A1	Non-matrisome	Non-matrisome	GO:CC not extracellular matrix	A0A5G2RAC3	A0A5G2RAC3	A0A5G2RAC3_PIG	0	0	0	0	0	0	0	0	0	0	1098.69	0	0	0	0	0	0	0	0	0	0	0	0	0	0	0	0	0	0	1582.66	0	0	0	0	0	0	0	2974.19	1728	0	3048.25	2346.35	0
ATP8B2	Non-matrisome	Non-matrisome	GO:CC not extracellular matrix	I3LIK9	I3LIK9	I3LIK9_PIG	0	0	0	0	1669.33	534.288	2490.19	2712.45	4398.23	1985.44	3219.64	4633.52	5043.18	0	0	0	0	382.109	0	1437.59	0	0	0	0	0	0	0	0	1629.69	1954.81	2163.44	0	0	967.379	0	0	0	0	0	0	0	778.015	0
ATPAF1	Non-matrisome	Non-matrisome	GO:CC not extracellular matrix	A0A287ANF8	A0A287ANF8	A0A287ANF8_PIG	0	1627.17	0	1499.49	0	1530.94	0	0	0	0	0	0	0	0	1552.68	0	2045.82	1620.2	1646.07	1196.17	0	1707.87	1530.28	1365.89	2600.91	0	0	0	0	0	0	0	1031.38	1486.37	1773.59	1614.81	1522.06	1853.99	1439.11	0	2312.11	1661.86	2975.73
ATPAF2	Non-matrisome	Non-matrisome	GO:CC not extracellular matrix	I3LAB4	I3LAB4	I3LAB4_PIG	0	2031.58	10446.9	7178.7	4965.14	5342.53	7885.34	3541.99	2468.87	0	0	0	0	0	3462.14	0	7808.11	9753.33	6836.37	1152.01	9799.06	2158.26	2251	4412.77	4013.39	0	0	0	0	0	0	3297.94	3640.96	4208.33	6348.72	3582.55	4651.98	6084.67	3574.44	2609.3	6173.97	4910.76	12351.2
ATRX	Non-matrisome	Non-matrisome	GO:CC not extracellular matrix	F1RPI9	F1RPI9	F1RPI9_PIG	0	0	0	758.158	1213.55	0	3672.22	0	2353.49	2893.62	5183.82	5060.11	6001.7	0	0	0	746.413	0	0	0	3358.92	2564.72	2915.82	1036.17	2810.69	14423.2	4187.83	16775.4	0	13025.1	12204.5	1417.87	1510.26	1660.36	5199.42	1380.03	3208.98	0	0	0	0	1047.42	0
ATXN10	Non-matrisome	Non-matrisome	GO:CC not extracellular matrix	A0A480M0G4	A0A480M0G4	A0A480M0G4_PIG	0	4381.3	6561.51	5321.84	3461.6	3917.59	6648.15	9064.69	5312.84	6725.01	6168.32	5854.18	7081.61	0	2537.38	0	2411.14	4643.94	3807.68	2582.22	6064.06	1919.95	3279.93	3605.97	4193.54	11372.5	9969.81	5431.63	9135.62	5548.49	3833.75	5099.71	4433.01	4221.7	3515.73	4546.87	2982.55	5670.19	3098.32	0	5785.29	4447.85	4148.56
AUH	Non-matrisome	Non-matrisome	GO:CC not extracellular matrix	F1RN10	F1RN10	F1RN10_PIG	0	7326.55	7393.42	9746.19	7495.31	7507.76	6191.11	0	0	38858.1	4480.88	0	4041.01	0	9937.95	13199.7	10929	5946.79	7847.3	3742.75	0	3610.3	3924.47	4298.72	3096.42	0	0	0	0	2950.12	0	2155.46	4474.64	3287.58	5065.9	5780.16	0	4506.93	4668.61	0	5041.29	5123.34	4574.53
AVEN	Non-matrisome	Non-matrisome	GO:CC not extracellular matrix	A0A287ANF5	A0A287ANF5	A0A287ANF5_PIG	0	1047.33	726.32	1378.46	0	1363.89	0	0	0	0	0	0	0	0	820.228	0	448.395	589.36	492.991	1127.08	0	0	509.295	815.005	665.757	0	0	0	0	1445.91	0	0	718.624	735.989	0	1074.46	0	0	0	0	0	0	0
AVIL	Non-matrisome	Non-matrisome	GO:CC not extracellular matrix	I3LI80	I3LI80	I3LI80_PIG	0	0	0	0	585.9	0	1740.83	0	0	2716.9	1201.29	2755.91	0	0	0	0	0	0	0	0	2224.46	0	0	1683.11	2163.57	0	0	0	0	2214.51	0	0	610.418	859.824	688.395	267.919	3649.85	0	0	0	0	0	0
AZGP1	Non-matrisome	Non-matrisome	GO:CC extracellular matrix (GO:0005576, GO:0005578 & GO:0031012) & GO:CC not extracellular matrix	A0A287BJ64	A0A287BJ64	A0A287BJ64_PIG	0	1793.11	2610.79	2304.53	2025.12	4565.36	2376.95	3184.02	3715.87	3695.8	5517.39	0	2891.53	0	3570.17	0	3654.01	4110.8	2842	0	0	0	0	929.022	0	0	0	0	0	0	0	0	0	0	0	0	0	0	0	0	0	0	0
AZU1	Non-matrisome	Non-matrisome	GO:CC extracellular matrix (GO:0005576, GO:0005578 & GO:0031012) & GO:CC not extracellular matrix	P80015	P80015	CAP7_PIG	0	937.688	2238.87	0	1681	2674.65	0	0	5879.86	5094.23	10334.2	2648.57	2736.68	0	1276.35	0	1281.42	4642.99	0	2210.9	3248.09	1779.41	2092.64	6717.19	3502.85	16374	9833.75	3607.13	6411.85	271449	5389.53	1717.95	1202.74	2500.59	1681.04	4345.12	3128.37	6303.26	8205.23	10484.5	6309.77	16669.3	4257.48
B2M	Non-matrisome	Non-matrisome	GO:CC extracellular matrix (GO:0005576, GO:0005578 & GO:0031012) & GO:CC not extracellular matrix	Q07717	Q07717	B2MG_PIG	0	20015.4	19969.7	17837.5	23806.8	20990.6	32908.6	29006.6	30864.4	46607	27245.5	23229.2	46566.6	0	18126.1	8219.97	26627.1	17196.9	17116.3	62955.3	17012	19350	25381.2	28286.6	17712	50811.7	31761.8	34323.7	22109.6	85686.5	59578.3	14606.8	18767.2	13680.2	21292.6	25986.4	16761.9	6869.4	4881.06	14869.3	12680.8	4783.69	7412.56
B3GAT3	Non-matrisome	Non-matrisome	GO:CC not extracellular matrix	I3LK23	I3LK23	I3LK23_PIG	0	0	0	0	0	0	0	0	0	2025.4	0	0	0	0	872.998	0	0	0	0	0	0	1295.07	0	0	0	0	0	0	0	1479.88	0	1510.75	0	1564.39	1455.27	0	0	0	1667.14	0	0	1400.62	0
B3GLCT	Non-matrisome	Non-matrisome	GO:CC not extracellular matrix	F1RSS9	F1RSS9	F1RSS9_PIG	0	1637.72	0	2095.4	1863.06	0	2801.48	5010.29	3052.49	3105.69	5984.03	6624.03	5338.77	0	925.072	0	1347.91	0	0	1014.98	0	0	0	0	0	0	0	2873.38	0	1841.31	0	0	0	0	0	1015.86	0	0	377.519	0	0	773.999	0
B4GALT1	Non-matrisome	Non-matrisome	GO:CC not extracellular matrix	A0A287AIG3	A0A287AIG3	A0A287AIG3_PIG	0	0	0	0	0	0	0	0	0	2384.19	3836.72	0	0	0	0	0	0	0	0	0	0	0	0	0	0	0	0	4520.75	0	1002.03	2825.61	0	1216.83	0	0	0	0	0	0	0	0	0	0
B9D1	Non-matrisome	Non-matrisome	GO:CC not extracellular matrix	A0A287BIY2	A0A287BIY2	A0A287BIY2_PIG	0	0	0	1918.94	4722.4	1255.07	8457.37	9937.87	7673.01	15674.7	11017.7	16067.3	8299.54	0	0	0	0	0	0	6152.23	4058.07	1889.5	2064.21	1422.1	1486.99	34622.8	10512.6	23332.4	18143.3	8333.68	16504.5	0	0	1890.02	3897.9	1101.71	2010.14	0	0	0	0	0	0
BABAM1	Non-matrisome	Non-matrisome	GO:CC not extracellular matrix	A0A286ZQV9	A0A286ZQV9	A0A286ZQV9_PIG	0	3168.29	2105.16	2626.15	2536.64	1980.67	2743.16	0	3007.75	3389.99	0	0	2516.69	0	2094.18	0	2218.27	1582.48	2361.53	2890.67	0	1685.42	1796.68	1924.41	1249.48	0	0	3699.56	0	5196.6	0	1751	1599.26	2626.08	0	1781.82	1371.97	0	0	0	0	0	0
BAG2	Non-matrisome	Non-matrisome	GO:CC not extracellular matrix	A0A287AV76	A0A287AV76	A0A287AV76_PIG	0	5375.18	5388.27	6169.5	5767.69	6062.98	5134.08	3802.78	3806.88	3455.9	4778.71	5285.35	4956.11	0	4095.4	10069.7	5135.61	5642.21	6206.89	10390.4	9683.2	8911.71	6381.92	12112.2	10453.8	8968.84	6997.76	12669.8	9342.1	11110.9	11474.1	4153.43	5486.85	5931.29	8781.15	7914.68	7452.26	2563.74	3438.29	0	1663.32	3093.03	2941.74
BAG3	Non-matrisome	Non-matrisome	GO:CC not extracellular matrix	F1S415	F1S415	F1S415_PIG	0	21298	20428.3	18854.4	10847.3	17342	7545.21	4021.26	6120.85	2665.84	3744.04	7118.53	7356.61	2681620	16899.3	26830.8	22860.4	16951.7	17621.4	11077	8968.6	6037.5	7627.65	12187.4	6438.04	0	0	0	0	3822.17	0	3681.24	6267.79	6164.05	8917.57	12046.7	4503.17	3408.39	7918.41	0	3696.08	2796.68	4288.78
BAG4	Non-matrisome	Non-matrisome	GO:CC not extracellular matrix	A0A287AP23	A0A287AP23	A0A287AP23_PIG	0	1340.38	2129.87	1405.98	1338.99	1387.98	3569.01	2372.99	3532.16	1670.4	3029.35	6774.36	2845.47	0	657.211	0	1259.71	1602.37	966.645	0	0	0	0	0	0	0	0	2730.58	0	1205.11	0	0	0	0	0	1129.49	0	0	0	0	0	0	0
BAG5	Non-matrisome	Non-matrisome	GO:CC not extracellular matrix	K9IVC2	K9IVC2	K9IVC2_PIG	0	1111.81	767.474	2391.27	1487.21	1773.73	2729.28	0	1745.48	1646.9	1301.87	1309.93	1773.52	0	1257.54	0	1510.57	1405.64	1311.15	988.481	729.592	1363.51	1497.34	1486.62	1339.53	1089.7	2468.86	2354.75	0	1317.08	0	2060.41	1478.27	1732.66	2025.48	1582.4	1111.54	2220.15	1312.82	0	1954.64	1255.93	1944.8
BAG6	Non-matrisome	Non-matrisome	GO:CC not extracellular matrix	A5D9M6	A5D9M6	BAG6_PIG	0	2866.47	2879.49	3611.28	2041.38	2945.2	1907.39	4136.16	991.548	2475.11	2653.75	0	1932.83	0	2964.44	0	3127.38	2138.18	2100.98	5713.77	3470.26	6471.87	5587.08	5321.25	5035.33	6674.88	5622.77	7091.71	3586.51	12856.8	7411.91	2697.09	3385.69	2812.13	5572.01	3524.33	3601.84	4181.2	3056.37	0	3401.79	2615.5	3333.63
BAK1	Non-matrisome	Non-matrisome	GO:CC not extracellular matrix	A0A4X1T7P6	A0A4X1T7P6	A0A4X1T7P6_PIG	0	1812.17	0	0	0	0	0	0	0	2274.34	0	0	0	0	490.249	0	1258.42	1072.9	0	0	0	0	0	0	0	0	0	0	0	1076.35	0	0	0	0	0	0	0	2414.24	814.815	1738.46	2363.24	1552.79	1882.13
BANF1	Non-matrisome	Non-matrisome	GO:CC not extracellular matrix	F1RU33	F1RU33	F1RU33_PIG	0	13861.3	6035.7	7560.78	14752.3	6223.95	13736.6	30757.6	47205.2	64093.2	31496.1	133356	27882.6	0	2948.12	0	10419.9	5514.52	5656.53	36886	13469.7	5092.3	10493.4	7339.19	3310.04	155139	48637.8	78740.6	155667	28335	41384.3	9202.23	14331	8968.98	7501.53	8783.09	5751.82	7108.67	4205.06	15850.4	5821.19	5685.94	4447.53
BASP1	Non-matrisome	Non-matrisome	GO:CC not extracellular matrix	A0A287ALA0	A0A287ALA0	A0A287ALA0_PIG	0	1807.32	0	2084.04	2128.33	2126.54	4495.61	3929.54	4316.65	7247.96	3937.33	0	3411.31	0	976.588	0	1274.72	1109.04	1151.12	3409.86	0	0	1405.02	1186.66	0	0	2798.55	1935.7	0	4365.35	7332.28	0	768.201	0	921.926	866.653	0	0	2158.38	0	0	801.421	0
BAX	Non-matrisome	Non-matrisome	GO:CC not extracellular matrix	A0A286ZTT0	A0A286ZTT0	A0A286ZTT0_PIG	0	2735.42	3938.02	1990.22	2636.13	1492.97	4701.48	8319.11	3288.51	5937.54	4129.05	2805.09	2601.56	0	1649.23	0	2757.84	1453.9	1459.45	0	2772.42	0	0	1241.59	1025.12	0	0	0	0	2248.39	0	1501.01	2512.39	2004.27	879.074	1302.84	780.822	2094.35	1312.16	0	1211.64	1251.51	2759.07
BAZ1B	Non-matrisome	Non-matrisome	GO:CC not extracellular matrix	I3LCE6	I3LCE6	I3LCE6_PIG	0	0	1610.15	3369.32	8078.15	3478.62	12834.5	20844.9	18594.8	26488.1	22283.9	42237.1	17116.2	0	1589.18	0	2440.65	3353.61	0	13316.5	11405.2	6425.2	7259.34	6416.28	6562.23	30478.4	3293.17	14543.3	11961.1	11534	7974.63	5659.63	4850.85	5251.07	6466.44	5291.53	8645.84	0	0	0	0	1630.23	0
BCAM	Non-matrisome	Non-matrisome	GO:CC extracellular matrix (GO:0005576, GO:0005578 & GO:0031012) & GO:CC not extracellular matrix	I3L9I6	I3L9I6	I3L9I6_PIG	0	10392.7	9861.71	12807.3	10977.3	10390.5	11070.4	8814.67	8503.01	10680.9	12728.3	15820.3	18963.6	0	13946.9	20479.1	9440.14	9349.89	9684.42	6066.2	9427.77	2325.65	3804.77	8375.24	3906.95	0	11383	0	0	2924.87	4958.3	5248.38	6738.17	5497.66	5933.36	7862.09	3747.36	15099.4	17323.5	16916.3	11231.9	11674.4	9856.43
BCAP31	Non-matrisome	Non-matrisome	GO:CC not extracellular matrix	F1S2A8	F1S2A8	F1S2A8_PIG	0	4555.68	5735.63	4566.61	6064.17	3811.85	7934.54	4503.76	7020.94	6832.37	10154.4	3891.89	9119.48	0	3965.88	13382.5	3467.69	4262.76	3955.87	5859.52	5874.18	962.492	1736.78	1653.56	2500.26	7924.45	0	0	0	5914.09	5772.4	3763.43	5980.14	5433.31	2783.43	5286.59	0	14138.6	16581.1	10586.8	16797.2	11719.5	12265.4
BCAS2	Non-matrisome	Non-matrisome	GO:CC extracellular matrix (GO:0005576, GO:0005578 & GO:0031012) & GO:CC not extracellular matrix	I6L631	I6L631	I6L631_PIG	0	1672.07	1392.5	1518.64	2278.06	1093.91	2867.72	3808.73	2338.6	2524.42	3144.26	3533.14	5668.54	0	1009.3	0	1399.38	1203.63	2182.75	1960.11	1979.16	1371.93	821.204	1292.22	1382.56	3257.15	0	0	0	3565.89	0	0	992.417	676.333	1659.95	1521.87	908.295	0	0	0	0	0	0
BCAT2	Non-matrisome	Non-matrisome	GO:CC not extracellular matrix	A0A287BER5	A0A287BER5	A0A287BER5_PIG	0	16871	12297.1	22672.4	19953.2	23826.5	12324	7423.14	10162	8283.26	5906.72	15906	7825.95	0	19125.7	52219.3	22049.7	19059.5	25034.7	12376.5	6969.72	7262.09	11838	11261.2	13704.5	0	0	4380.7	0	5021.03	0	15462.4	11393.2	17089.6	10786.8	14289.6	16072.8	17574	8811.31	14824.4	19977.7	16852.4	17264.3
BCKDHA	Non-matrisome	Non-matrisome	GO:CC not extracellular matrix	F1RHA0	F1RHA0	F1RHA0_PIG	0	4990.78	4106.57	4389.63	3663.87	5108.74	4028.75	0	2012.99	2811.73	2647.45	3273.26	4342.47	0	5406.61	36438.6	6737.45	4218.47	5752.61	6187.16	0	5399.41	6105.53	5260.33	5055.23	0	0	0	0	1498.58	0	4611.8	3567.04	4834.73	8040.78	5114.93	6216.33	2443.11	2144.06	0	2995.24	2488.92	3574.24
BCKDHB	Non-matrisome	Non-matrisome	GO:CC not extracellular matrix	F1RQL3	F1RQL3	F1RQL3_PIG	0	4293.72	4762.66	2829.16	3172.91	3204.54	5430.95	0	0	1999.46	0	4302.91	2214.47	0	2302.39	0	4652.85	2246.27	3541.86	4127.08	2588.21	3161.81	4527.98	2634.22	2744.03	7101.24	1159.03	6388.17	0	1387.84	5236.57	6243.05	2527.17	6083.64	7667.57	4111.83	7495.99	6393.89	3896.98	2467.54	7609.59	4902.14	8480.27
BCKDK	Non-matrisome	Non-matrisome	GO:CC not extracellular matrix	A0A5G2QFT3	A0A5G2QFT3	A0A5G2QFT3_PIG	0	1959.4	0	1122.84	1015.46	2242.59	0	0	0	906.08	0	0	1736.96	0	1544.65	0	1397.33	1424.91	1783.46	2922.13	0	2192.13	2709.14	1361.16	1838.55	0	0	0	0	2295.79	3971.04	2794.91	2283.43	2998.35	2442.21	2818.17	4226.23	4654.17	3556.82	4393.11	5269.03	3307.61	4452.23
BCL2	Non-matrisome	Non-matrisome	GO:CC not extracellular matrix	A0A287APJ6	A0A287APJ6	A0A287APJ6_PIG	0	0	0	0	2197.9	573.126	1387.06	0	0	0	0	2407.8	0	0	460.608	0	0	0	0	2107.44	0	0	0	0	0	4145.96	0	0	0	1279.21	0	0	0	1755.78	0	0	0	0	0	0	0	0	0
BCL2L1	Non-matrisome	Non-matrisome	GO:CC not extracellular matrix	O77737	O77737;Q9N1A2	B2CL1_PIG	0	1242.19	0	1527.42	1665.59	1473.4	0	0	2874.54	0	3521.78	0	0	0	1308.46	0	0	973.326	0	2288.71	3728.64	0	1102.16	2165.54	1277.29	4948.32	1586.35	3609.93	0	4269.08	0	0	1221.21	0	2366.7	1101.46	0	0	1428.55	0	0	732.654	0
BCL2L13	Non-matrisome	Non-matrisome	GO:CC not extracellular matrix	A0A5G2QQ79	A0A5G2QQ79	A0A5G2QQ79_PIG	0	5074.25	6460.05	6752.12	8799.42	6472.71	8324.79	3135.81	4477.43	5935.57	4969.71	9471.99	4450.59	0	4497.2	0	7306.04	5610.45	7785.34	5699.74	12697.3	4312.92	5274.82	8170.11	9266.5	11557.2	8101.52	5610.62	6206.58	2984.22	7350.13	3523.1	4023.06	3997.22	6611.6	4124.31	3108	11995.5	10039.8	10040.2	9403.3	8649.73	9677.04
BCL7C	Non-matrisome	Non-matrisome	GO:CC not extracellular matrix	F1RG97	F1RG97;A0A286ZWW6;A0A5G2RET8	F1RG97_PIG	0	0	0	0	2078.26	0	0	0	5393.87	8242.75	7993.77	0	5240.87	0	590.016	0	0	0	0	3336.03	0	0	0	0	0	5022.93	0	0	0	7578.45	0	0	0	0	0	0	0	0	0	0	0	0	0
BCLAF1	Non-matrisome	Non-matrisome	GO:CC not extracellular matrix	A0A286ZMT9	A0A286ZMT9	A0A286ZMT9_PIG	0	2215.6	0	0	0	0	4606.31	11939.3	0	0	0	0	0	0	329.754	0	943.154	868.426	0	0	11724.4	4667.48	0	0	6501.67	0	0	0	0	0	0	0	0	0	5795.06	0	0	0	0	0	0	0	0
BCS1L	Non-matrisome	Non-matrisome	GO:CC not extracellular matrix	A0A287AKM3	A0A287AKM3	A0A287AKM3_PIG	0	4802.66	5143.25	4619.1	3656.7	5038.1	3324.11	0	2599.18	3652.61	2510.16	2421.52	2122.17	0	4891.11	0	4217.79	6007.63	4203.47	6619.03	8847.67	17405.3	10981.2	10323.4	12102.7	7908.61	4361.26	6483.53	5438.18	4712.11	5357.58	10153	8738.54	10486.3	13020.9	7446.86	13784.9	18754.6	15453.6	16439.9	21235.9	13320.1	14325.3
BDH1	Non-matrisome	Non-matrisome	GO:CC not extracellular matrix	F1SQX8	F1SQX8	F1SQX8_PIG	0	15242.4	15347.8	15143	11021.7	19700.3	9490.27	0	4265.6	0	0	0	4561.05	0	29616.8	34583.1	19938.1	18657	18690.4	13997.1	21345.1	30424.4	27894.7	19454.5	19854	0	0	0	9457.2	4558.06	9748.86	22338.5	21025.4	24291.6	29230.2	18454.2	20117.2	28414.6	22657.4	29206.9	46771	21410.8	24208.7
BDH2	Non-matrisome	Non-matrisome	GO:CC not extracellular matrix	I3LHC8	I3LHC8	I3LHC8_PIG	0	3063.04	5079.78	4850.04	7055.73	4962.07	4747.26	4563.89	3099.31	3393.41	5499.64	4700.2	4067.25	0	4726.37	7008.51	8438.2	4651.23	4387.71	0	0	0	1002.48	1871.96	0	0	0	0	0	1313.37	0	0	863.888	0	595.739	1361.01	0	0	782.264	0	0	0	0
BET1	Non-matrisome	Non-matrisome	GO:CC not extracellular matrix	A0A4X1U2Q2	A0A4X1U2Q2	A0A4X1U2Q2_PIG	0	0	0	0	1122.72	0	0	0	0	0	1915.73	0	3005.02	0	149.933	0	0	672.578	0	0	0	0	0	0	0	2563.72	0	0	0	702.069	0	0	0	0	0	0	0	2246.87	405.106	0	0	1402.17	0
BGN^	Core matrisome	Proteoglycans	GO:CC extracellular matrix (GO:0005576, GO:0005578 & GO:0031012) & GO:CC not extracellular matrix	A0A5K1UKC5	A0A5K1UKC5	A0A5K1UKC5_PIG	0	19026.5	30981.6	22924.3	31329.2	20572.1	92814.6	188758	205275	260568	287864	153537	164434	0	7739.71	0	8216.07	3393.57	7947.79	69169	33971.8	15747.4	16060.6	19442	10130.4	282265	958326	1014000	109908	737772	538428	0	12315.3	35145.4	5578.89	19041	0	0	3280.65	0	0	3056.28	0
BGN°	Core matrisome	Proteoglycans	GO:CC extracellular matrix (GO:0005576, GO:0005578 & GO:0031012) & GO:CC not extracellular matrix	Q9GKQ6	Q9GKQ6;A0A5K1UKC5	PGS1_PIG	0	416178	389854	233864	1211910	261049	1534140	2116170	3554040	3012720	3631930	997688	2016100	109996000	110882	235608	222607	59437.8	55992.1	1057940	817261	150662	292892	149062	110418	2994480	11119300	8122890	2343300	4241520	4957850	213919	135915	386192	241116	275786	183934	28526.4	60298.7	56989.5	57238.2	37089.3	44020.7
BHMT^	Non-matrisome	Non-matrisome	GO:CC not extracellular matrix	Q95332	Q95332;E7D6R2	BHMT1_PIG	0	2593.69	0	4634.34	4817.33	3096.31	15996.2	10505.4	11991.5	5291.46	16095.5	33956.9	26938.6	0	2817.68	9145.09	2695.02	2276.19	5917.74	0	2031.36	0	0	2683.38	2251.92	23040.7	7214.21	34371.6	6154.98	7236.44	10313.6	3136.11	0	0	1655.57	0	1706.58	3347.23	2456.55	4848.86	3905.62	2807.9	0
BHMT°	Non-matrisome	Non-matrisome	GO:CC not extracellular matrix	E7D6R2	E7D6R2	E7D6R2_PIG	0	0	0	0	1943.62	0	5818.89	0	4204.21	0	6123.38	4706.04	9333.8	0	0	0	1338.2	0	2040.29	0	0	0	0	0	0	0	12739.7	6130.73	0	1945.16	0	0	0	0	0	0	1098.33	0	0	4934.16	0	2084.92	2674.45
BICD2	Non-matrisome	Non-matrisome	GO:CC not extracellular matrix	A0A287AJT8	A0A287AJT8	A0A287AJT8_PIG	0	0	0	0	0	891.474	0	0	0	1279.24	2085.76	0	1187.07	0	321.014	0	0	0	0	0	0	0	0	0	1434.37	0	0	0	0	1255.92	0	0	604.634	0	0	0	943.37	0	0	0	0	0	0
BID	Non-matrisome	Non-matrisome	GO:CC not extracellular matrix	Q4JHS0	Q4JHS0	BID_PIG	0	662.099	0	0	0	709.802	1003.89	2148.45	0	0	2471.61	2507.62	2153.07	0	0	0	576.889	453.106	538.047	0	0	0	0	871.378	0	0	0	0	0	1338.03	0	0	0	0	450.674	0	0	0	0	0	0	0	0
BIN1	Non-matrisome	Non-matrisome	GO:CC not extracellular matrix	A0A287AVP0	A0A287AVP0	A0A287AVP0_PIG	0	119245	133263	165415	122694	156715	87643.4	36234.2	52852.2	31887.7	15736.3	82796.4	34222.6	0	214272	61192.6	166156	155923	147738	44601.2	76649.2	83522.6	109655	110858	87497.5	20165.7	13768.3	11016.2	34832.2	12274.5	24448.8	64260.2	75188.3	42214.6	104567	86766.1	79502.9	41297.6	44257.5	27266.3	21160.7	49869	43911.8
BIN3	Non-matrisome	Non-matrisome	GO:CC not extracellular matrix	A0A4X1VAS8	A0A4X1VAS8	A0A4X1VAS8_PIG	0	2418.09	0	1871.58	2816.43	0	2077.88	0	0	0	0	0	3697.63	0	0	0	0	1332.31	2036.24	0	3672.41	3833.98	3462.22	2970.55	2016.6	7437.47	0	0	0	3525.86	0	0	1542.59	994.22	4885.26	2019.32	2743.03	0	0	0	0	1160.73	0
BIRC6	Non-matrisome	Non-matrisome	GO:CC not extracellular matrix	F1S402	F1S402	F1S402_PIG	0	0	0	0	0	0	0	0	0	0	0	0	0	0	0	0	0	0	0	0	0	789.458	0	487.417	483.849	0	0	0	0	1044.64	0	0	0	588.316	1113.59	1020.28	811.771	0	0	0	0	0	0
BLMH	Non-matrisome	Non-matrisome	GO:CC not extracellular matrix	F1RN71	F1RN71	F1RN71_PIG	0	5125.03	7072.76	6349.32	7635.11	6364.24	5153.82	2635.88	3603.03	2588.34	3714.05	0	1644.85	0	11201.1	0	9839.41	5937.85	5888.68	779.616	0	368.754	1073.27	1756.45	519.666	0	1391.56	0	0	1819.9	0	1220.91	2191.67	2188.31	675.738	2906.01	836.43	2534	2761.36	0	2239.47	2878.01	1553.41
BLOC1S1	Non-matrisome	Non-matrisome	GO:CC not extracellular matrix	A0A4X1W434	A0A4X1W434	A0A4X1W434_PIG	0	2066.38	1502.09	0	1796.68	1496.27	4017.38	3547.15	0	1761.77	3229.76	0	3179.51	0	1117.82	0	1399.79	0	843.111	0	0	0	1291.28	1378.28	785.201	0	0	1606.98	0	3260.29	2168.11	0	1169	0	1779.73	854.744	0	0	0	0	0	0	0
BLOC1S4	Non-matrisome	Non-matrisome	GO:CC not extracellular matrix	A0A4X1SLB7	A0A4X1SLB7	A0A4X1SLB7_PIG	0	0	0	0	2038.01	0	2107.74	0	2599.47	2235.93	0	3580.53	2623.8	0	0	0	0	0	0	0	0	0	0	0	0	7780.7	0	3890.01	0	3434.14	0	0	0	0	0	0	2544.22	0	0	0	0	0	0
BLTP1	Non-matrisome	Non-matrisome	GO:CC not extracellular matrix	A0A287ATK3	A0A287ATK3	A0A287ATK3_PIG	0	0	0	1478.02	0	1004.02	0	0	0	0	0	0	0	0	294.117	0	0	0	0	0	0	0	0	0	657.872	3347.4	0	2937.8	0	1127.93	3790.47	0	584.866	884.059	0	749.354	0	0	0	0	0	0	0
BLTP3B	Non-matrisome	Non-matrisome	GO:CC not extracellular matrix	A0A287ABR1	A0A287ABR1	A0A287ABR1_PIG	0	0	0	0	0	0	0	0	0	0	0	0	670.539	0	0	0	0	0	0	0	529.539	0	0	0	0	4019.15	2333.21	8953.49	1609.33	2667.32	3575.95	0	0	191.063	0	0	0	0	0	0	0	0	0
BLVRA	Non-matrisome	Non-matrisome	GO:CC not extracellular matrix	A0A480V8U1	A0A480V8U1	A0A480V8U1_PIG	0	3118.65	6923.79	5884.8	5691.87	4184.81	8793.12	4195.3	4200.58	4030.02	3438.95	6413.27	2807.94	0	3995.49	18405.8	6155.18	6202.93	5733.11	0	3563.32	1678.86	1414.09	2561.55	2113.02	0	0	0	0	2523.13	0	0	2138.12	1513.19	1715.84	2339.48	1950.91	4094.5	2591.88	0	2625.66	3079.97	3068.38
BLVRB	Non-matrisome	Non-matrisome	GO:CC not extracellular matrix	I3LQH7	I3LQH7	I3LQH7_PIG	0	38606.4	77645.3	69301	79025.8	64587.3	49174.7	36791.7	40004.2	24413.4	34087.3	70848.5	36879.3	15795300	85972.6	57264.5	107505	65278.4	77141.7	24422.4	53605.4	35853.3	82605.8	70414.5	69634.1	41955.7	30062.5	21392.7	17511.1	30562.1	18097.6	19637.8	40454.3	46773.5	49826.5	29136.1	25385.9	49848.8	59205.1	20183.5	35491.9	53485.7	36627.2
BNIP1	Non-matrisome	Non-matrisome	GO:CC not extracellular matrix	A0A4X1UAX1	A0A4X1UAX1	A0A4X1UAX1_PIG	0	0	0	0	0	0	0	0	0	0	0	0	0	0	0	0	0	0	0	0	0	0	0	0	0	0	0	0	0	784.895	0	0	0	1889.39	0	0	0	2757.95	3607.01	0	2450.16	2704.36	2242.39
BNIP3	Non-matrisome	Non-matrisome	GO:CC extracellular matrix (GO:0005576, GO:0005578 & GO:0031012) & GO:CC not extracellular matrix	I3LDJ9	I3LDJ9	I3LDJ9_PIG	0	708.298	0	0	0	1217.04	0	0	0	0	0	0	0	0	759.409	0	1482.53	1361.66	1461.73	0	0	664.635	543.568	903.686	1033.98	0	0	0	0	0	0	0	0	0	899.584	589.195	0	1263.99	1017.15	0	1207.01	1071.56	0
BOK	Non-matrisome	Non-matrisome	GO:CC not extracellular matrix	A0A287AST0	A0A287AST0	A0A287AST0_PIG	0	0	0	0	0	0	0	0	0	1040.36	2022.05	0	971.838	0	0	0	0	0	0	0	0	0	0	0	0	0	0	0	0	1168.05	0	0	0	0	0	0	0	0	0	0	0	0	0
BOLA1	Non-matrisome	Non-matrisome	GO:CC not extracellular matrix	F1SDF8	F1SDF8	F1SDF8_PIG	0	1093.71	0	1163.05	1364.69	0	0	0	0	0	0	0	0	0	2482.24	0	2546.59	1935.2	1198.57	0	0	896.097	762.574	0	758.691	0	0	0	0	0	0	0	0	0	0	940.01	0	0	0	0	0	0	858.311
BOLA3	Non-matrisome	Non-matrisome	GO:CC not extracellular matrix	A0A5G2RAT5	A0A5G2RAT5	A0A5G2RAT5_PIG	0	372.973	0	0	315.796	364.238	0	0	0	0	0	0	0	0	478.045	0	480.755	558.962	527.234	0	0	0	0	0	0	0	0	0	0	0	0	0	0	0	0	284.385	0	0	0	0	0	0	0
BORCS5	Non-matrisome	Non-matrisome	GO:CC extracellular matrix (GO:0005576, GO:0005578 & GO:0031012) & GO:CC not extracellular matrix	A0A287A4F7	A0A287A4F7	A0A287A4F7_PIG	0	3358.01	0	0	2446.37	1646.89	0	0	0	2341.78	1652.41	0	2275.51	0	3059.12	4826.09	1671.04	0	1757.8	0	0	0	0	0	0	0	0	0	0	2396.73	0	0	0	0	0	0	0	0	0	0	0	0	0
BORCS6	Non-matrisome	Non-matrisome	GO:CC extracellular matrix (GO:0005576, GO:0005578 & GO:0031012) & GO:CC not extracellular matrix	I3L825	I3L825	I3L825_PIG	0	0	0	0	0	0	0	0	0	0	0	0	0	0	1041.34	0	1183.61	592.127	568.164	0	0	0	0	0	0	0	0	0	0	1588.43	0	0	0	0	0	0	0	0	0	0	0	0	0
BPGM	Non-matrisome	Non-matrisome	GO:CC not extracellular matrix	A0A286ZQ31	A0A286ZQ31	A0A286ZQ31_PIG	0	2890	6986.87	5137.44	4895.62	3295.6	0	0	0	0	0	6913.33	2132.24	0	3886.82	0	9257.47	3635.35	4340.49	0	0	0	2145.59	3834.96	2887.75	0	0	0	0	1299.4	0	0	2166.38	1693.38	2054.38	2024.13	0	0	0	0	0	0	0
BPHL	Non-matrisome	Non-matrisome	GO:CC not extracellular matrix	F1RWY7	F1RWY7	F1RWY7_PIG	0	1958.42	1438.27	2001.5	2714.06	2311.45	2174.88	2811.66	1175.76	3508.55	0	2313.8	2342.58	0	3484.65	0	2874.35	2388.38	2312.97	2944.19	1317.98	1810.65	972.654	1353.05	943.143	7733.12	4342.91	4178.37	1178.87	2689.38	3119.58	0	1018.17	1109.27	0	1310.5	1167.03	2697.55	2177.78	2524.07	3766.13	2208.97	4172.61
BPNT1	Non-matrisome	Non-matrisome	GO:CC not extracellular matrix	A0A287A722	A0A287A722	A0A287A722_PIG	0	1665.16	0	0	2899.42	2274.68	0	0	0	0	0	0	0	0	1255.97	8868.23	3921.32	2822.09	3689.9	0	0	0	0	0	0	0	0	0	0	771.947	0	0	0	0	0	0	0	0	1882.2	0	0	0	0
BPNT2	Non-matrisome	Non-matrisome	GO:CC not extracellular matrix	F1RT67	F1RT67	IMPA3_PIG	0	1178.71	0	1469.35	1304.03	643.651	0	1109.39	1436.14	2308.02	3312.64	3752.59	1607.48	0	1118.2	0	1182.31	1509.71	1549.97	1628.25	0	664.372	976.578	1247.53	1307.49	0	0	6823.82	5380.54	2637.93	6373.56	0	0	0	0	728.018	0	0	0	0	0	0	0
BPTF	Non-matrisome	Non-matrisome	GO:CC not extracellular matrix	A0A8W4FAE6	A0A8W4FAE6	A0A8W4FAE6_PIG	0	0	0	0	428.953	0	1210.53	0	0	2261.17	2719.04	0	825.477	0	0	0	0	0	0	0	0	0	0	0	0	6404.07	0	2329.04	1089.74	1866.96	2575.52	0	0	0	0	0	0	0	0	0	0	0	0
BRAT1	Non-matrisome	Non-matrisome	GO:CC not extracellular matrix	F1RI80	F1RI80	F1RI80_PIG	0	0	0	0	0	0	2042.74	2261.46	0	2243.61	1643.38	0	0	0	0	0	0	0	0	1263.58	0	0	1934.56	0	0	6978.51	0	3514.71	1852.12	3170.92	3346.46	0	0	0	1216.49	0	911.187	0	0	0	0	569.931	0
BRD3	Non-matrisome	Non-matrisome	GO:CC not extracellular matrix	F1S033	A0A286ZYX7;F1S033	F1S033_PIG	0	0	0	1260.74	0	1134.41	0	2794.27	0	3967.78	2930.46	5226.37	3674.4	0	0	0	0	0	0	0	0	0	0	0	0	0	0	0	0	0	0	0	0	0	0	0	0	0	0	0	0	0	0
BRI3BP	Non-matrisome	Non-matrisome	GO:CC not extracellular matrix	A0A287ATJ5	A0A287ATJ5	A0A287ATJ5_PIG	0	0	0	0	0	0	0	0	0	0	0	0	0	0	0	0	0	0	0	0	0	0	0	0	0	0	0	0	0	0	0	0	1175.12	0	0	1226.14	0	0	2641.52	0	3129.07	0	0
BRIX1	Non-matrisome	Non-matrisome	GO:CC not extracellular matrix	F1SND4	F1SND4	F1SND4_PIG	0	0	0	0	0	0	0	0	0	0	3889.31	0	0	0	0	0	0	0	0	2257.39	0	1175.52	0	1294.93	1729.52	6144.65	3807.14	6125.37	3402.79	4922.57	3716.06	0	1634.91	867.155	2374.98	0	1241.5	0	0	0	0	904.781	0
BRK1	Non-matrisome	Non-matrisome	GO:CC not extracellular matrix	F2Z5S6	F2Z5S6	F2Z5S6_PIG	0	2578.13	3193.42	3083.65	4816.89	3071.67	0	6262.25	8676.01	6286.06	7011.33	0	7671.83	0	2418.63	0	3270.54	2117.26	2175.75	6412.81	5105.56	2578.67	1767.65	2939.69	2697.43	9132.2	0	7913.27	8426.98	20152.5	15895.3	0	1805.43	1099.34	2683.23	2855.03	0	0	809.789	0	1893.88	1050.99	0
BRMS1L	Non-matrisome	Non-matrisome	GO:CC not extracellular matrix	A0A4X1TCZ2	A0A4X1TCZ2	A0A4X1TCZ2_PIG	0	0	0	0	0	0	3000.74	3874.41	0	0	2732.76	0	3331.77	0	0	0	0	0	0	0	0	0	0	0	0	0	0	3153.45	0	1929.9	1903.96	0	0	0	0	0	1108.42	0	0	0	0	0	0
BROX	Non-matrisome	Non-matrisome	GO:CC not extracellular matrix	A0A5G2Q777	A0A5G2Q777	A0A5G2Q777_PIG	0	3918.39	2806.34	3003.44	2491.31	3206.76	3689.51	0	0	3690.47	0	0	2659.4	0	2054.74	0	0	3317.02	3251.47	0	0	0	0	0	0	0	0	0	0	0	0	0	0	0	0	0	0	4054.95	1636.08	0	0	2528.06	1662.97
BSCL2	Non-matrisome	Non-matrisome	GO:CC not extracellular matrix	I3LC49	I3LC49	I3LC49_PIG	0	0	0	0	0	0	0	0	0	0	0	0	0	0	0	0	0	0	0	0	0	0	0	0	0	0	0	0	0	0	0	0	2276.88	0	0	0	0	0	0	0	0	0	0
BSG	Non-matrisome	Non-matrisome	GO:CC not extracellular matrix	A0A5G2QGZ8	A0A5G2QGZ8	A0A5G2QGZ8_PIG	0	218507	150961	211796	146661	158880	165910	127735	139610	158178	148971	173980	169547	0	139707	281670	225892	154939	152999	357839	219610	136466	114995	233752	173872	309379	275906	248493	306167	285051	365386	245337	184512	166066	262561	166445	130555	159799	112616	135044	162063	97582.8	143465
BST1	Non-matrisome	Non-matrisome	GO:CC extracellular matrix (GO:0005576, GO:0005578 & GO:0031012) & GO:CC not extracellular matrix	A0A8W4FC76	A0A8W4FC76	A0A8W4FC76_PIG	0	13571.5	23103.2	14610.8	37995.8	9886.66	35543.5	39435.7	65781.9	37896	49131.3	51776	54160.5	0	8127.92	10410.2	11470.8	4692.67	5909.75	46223.9	33880.2	5836.16	8328.53	8090.62	5042.87	87081.2	99971.9	126196	72260.3	50988.2	73233.9	11082.5	5061.59	15072.5	12560.6	4784.26	10849.8	27959.3	20821.2	15875.2	13218.9	13758.8	10451.5
BTBD1	Non-matrisome	Non-matrisome	GO:CC not extracellular matrix	F1RIB2	F1RIB2	F1RIB2_PIG	0	0	0	1360.29	0	1199.97	0	0	0	0	0	0	0	0	0	0	0	752.797	982.856	0	1126.1	1767.92	1670.76	1309.7	1214.89	0	0	0	0	0	0	947.958	1578.74	1603.64	1761.91	1309.31	1887.35	1997.86	1455.33	0	0	1245.24	1718.26
BTD	Non-matrisome	Non-matrisome	GO:CC extracellular matrix (GO:0005576, GO:0005578 & GO:0031012) & GO:CC not extracellular matrix	A0A286ZTX3	A0A286ZTX3	A0A286ZTX3_PIG	0	3354.75	5801.01	2606.27	6378.04	4135.96	2713.97	2806.7	4728.11	2437.24	4795.86	9499	4609.24	0	9478.38	0	9550.96	3276.67	3711.3	1503.88	0	0	0	1592.29	0	0	0	0	0	2227.56	0	0	1746	0	1471.98	1567.69	0	0	2447.81	0	0	957.832	0
BTF3	Non-matrisome	Non-matrisome	GO:CC not extracellular matrix	A0A287BJ88	A0A287BJ88	A0A287BJ88_PIG	0	1378.63	0	3523.74	0	3040.26	0	3663.73	0	1575.8	0	2099.07	0	0	1480.01	0	1886.74	3271.58	2594.31	888.714	0	1023.95	2225.3	1535.41	2134.99	0	0	0	0	1150.37	0	1161.87	947.368	0	1034.95	1821.77	2385.8	1134.35	967.251	2018.82	892.93	1316.17	0
BTF3L4	Non-matrisome	Non-matrisome	GO:CC not extracellular matrix	A0A4X1WB15	A0A4X1WB15	A0A4X1WB15_PIG	0	1366.42	0	2111.01	1396.51	1774.64	0	0	0	0	0	0	0	0	2099.88	0	1212.18	0	0	3347.73	0	3801.75	3211.05	2816.55	2076.55	0	0	0	0	2200.48	0	0	2253.06	0	2267.48	1602.32	0	0	1783.63	0	0	1181.4	0
BTNL9	Non-matrisome	Non-matrisome	GO:CC not extracellular matrix	I3LLH1	I3LLH1	I3LLH1_PIG	0	1074.95	2548.79	2590.52	0	0	1951.99	0	0	0	0	0	0	0	738.922	0	0	0	0	0	0	0	0	0	441.591	0	0	0	0	0	0	0	998.748	2117.74	0	0	0	7311.96	7610.78	4453.83	5003.39	3202.17	3471.18
BUB3	Non-matrisome	Non-matrisome	GO:CC not extracellular matrix	A0A4X1SFI9	A0A4X1SFI9	A0A4X1SFI9_PIG	0	2652.11	2936.75	3091.9	3371.75	2467.98	0	6402.16	5148.95	8605.42	6914.44	5403.38	5883.39	0	1781.16	0	2468.59	3000	1986.15	1855.98	0	982.287	1168.75	1352.89	0	0	0	4378.34	0	6011.56	0	0	1418.19	1167.57	0	1930.63	0	0	1428.25	0	2731.67	1294.04	0
BUD31	Non-matrisome	Non-matrisome	GO:CC not extracellular matrix	K7N7E9	K7N7E9	K7N7E9_PIG	0	5437.68	7664.99	6142.99	7389.75	5395.42	14700.9	15681.7	16349.6	14862.9	17926.4	26054.5	19792.4	0	2058.38	0	4106.4	3252.68	1781.72	5931.66	10007.9	4043.25	3513.71	4876.34	3703.08	30627.7	8798.14	11288	11637.2	15668.9	9737.28	4920.36	4074.03	5742.18	7122.22	3481.31	5944.42	3480.63	2298.89	3068.92	3971.48	4317.05	4405.6
BZW1	Non-matrisome	Non-matrisome	GO:CC not extracellular matrix	A0A287BJF3	A0A287BJF3	A0A287BJF3_PIG	0	2311.31	0	5479.67	3326.43	2493.9	0	0	0	3771.06	3067.79	1754.97	2980.64	0	2189.57	0	0	2638.56	2355.65	0	1915.89	2601.07	3262.99	4196.93	2913.92	2964.13	0	4941.22	0	7535.4	3918.47	2829.6	4323.66	0	2435.88	2561.77	2430.11	2122.95	2287.46	0	0	2168.54	0
BZW2	Non-matrisome	Non-matrisome	GO:CC not extracellular matrix	A0A287BQI6	A0A287BQI6	A0A287BQI6_PIG	0	11505.9	7693.32	8326.75	6871.3	10161.8	5190.07	1885.59	1654.08	0	0	0	2510.24	0	10234.1	0	10899.8	5695.45	8387.52	10273.8	5355.16	11293.6	12564.5	11784.7	8877.72	0	0	8063.65	0	4160.96	9165.46	11667.5	10440.7	10692.6	14407.5	8898.1	9205.47	11504.6	9972.85	11725.1	13281.3	11215.6	11112
C10orf71	Non-matrisome	Non-matrisome	gene not present in GO IDs	A0A8W4FP86	A0A8W4FP86	A0A8W4FP86_PIG	0	0	0	830.319	0	0	0	0	0	0	0	0	0	0	585.467	0	506.147	1227.37	0	0	0	220.448	308.571	828.907	1004.34	0	0	0	0	0	0	0	0	649.619	0	0	0	0	0	0	0	0	0
C12H17orf49	Non-matrisome	Non-matrisome	gene not present in GO IDs	A0A480SZL1	A0A480SZL1	A0A480SZL1_PIG	0	0	0	0	1660.3	0	0	3444.37	0	2234.13	3181.67	0	0	0	817.053	0	0	0	0	1615.77	0	0	973.512	0	0	0	0	0	0	2661.64	0	0	0	0	0	882.648	0	0	0	0	0	0	0
C1QA	Matrisome-associated	ECM-affiliated Proteins	GO:CC extracellular matrix (GO:0005576, GO:0005578 & GO:0031012) & GO:CC not extracellular matrix	Q69DL0	A0A287BNF7;Q69DL0	C1QA_PIG	0	1640.62	1369.22	917.081	4095.67	979.338	3987.85	3578.15	5818.14	9976.46	6771.33	4763.27	3384.91	0	642.447	0	1709.77	0	1275.21	2746.14	1350.91	1189.21	1472.36	1446.79	2665.56	5299.12	4550.97	7200.13	4672.72	4933.14	5714.98	3323.57	1399.78	0	1832.93	1347.95	1049.17	1355.84	741.733	0	2695.03	759.054	0
C1QB	Matrisome-associated	ECM-affiliated Proteins	GO:CC extracellular matrix (GO:0005576, GO:0005578 & GO:0031012) & GO:CC not extracellular matrix	A0A5G2QNN2	A0A5G2QNN2	A0A5G2QNN2_PIG	0	2535.17	2282.15	2180.13	6533.81	2029.15	8144.1	5807.94	7283.68	8326.29	9893.52	2675.57	6637.52	0	1899.21	0	3634.53	780.483	2270.43	887.699	0	567.419	1062.94	1148.07	1999.34	4963.71	6909.85	6793.7	8486.14	2801.7	0	2468.32	1585.8	1467.76	1773.76	2099.37	1932.16	0	0	0	1328.79	0	0
C1QBP	Non-matrisome	Non-matrisome	GO:CC extracellular matrix (GO:0005576, GO:0005578 & GO:0031012) & GO:CC not extracellular matrix	A0A0D5BWD2	A0A0D5BWD2	A0A0D5BWD2_PIG	0	3880.63	4156.45	6922.86	5953.68	5661.94	4097.47	2565.14	0	2988.71	2523.53	3314.07	3013.82	0	7855.41	11322.5	8936.62	5397.31	6782.79	7352.13	8597.89	4936.85	4599.11	6556.5	5625.66	0	0	4256.06	5904	3541.08	0	2980.82	3939.14	2755.44	8328.4	4819.78	4063.85	5307.75	6866.54	0	1673.93	4558.37	4743.93
C1QC	Matrisome-associated	ECM-affiliated Proteins	GO:CC extracellular matrix (GO:0005576, GO:0005578 & GO:0031012) & GO:CC not extracellular matrix	A0A286ZSJ7	A0A286ZSJ7	A0A286ZSJ7_PIG	0	2551.2	0	0	6627.16	3158.59	5846.45	9778.02	9562.93	11679.2	10965.8	3735.51	6169.52	0	0	8534.65	4134.24	0	2261.07	2843.29	0	0	0	2728.56	3332.09	4231.84	16673.3	6716.13	0	5001.22	19370.8	3636.23	0	0	2696.81	1815.33	2597.83	0	1709.6	0	2603.07	0	0
C1QTNF3	Matrisome-associated	ECM-affiliated Proteins	GO:CC not extracellular matrix	B9UJD6	B9UJD6	B9UJD6_PIG	0	16634.4	9446.28	14213.8	41219.5	14831.7	160626	268090	121305	514321	380303	501903	86734	0	1207.92	0	6219.58	2722.63	3098.06	49510.6	45751	6172.16	9313.55	12030.8	6926.48	769345	426619	657593	601683	120642	373476	9946.87	4996.1	3594.5	12447.2	9597.72	7307.74	7556.2	5651.54	47227.3	13163.2	14684.5	11872.9
C1QTNF4	Matrisome-associated	ECM-affiliated Proteins	GO:CC not extracellular matrix	A0A8W4F866	A0A8W4F866	A0A8W4F866_PIG	0	0	0	0	0	0	0	2568.95	0	9240.65	8736.31	9790.88	0	0	0	0	0	0	0	0	0	0	0	0	0	0	31195	12309.5	3209.91	5340.24	6150.02	0	0	0	0	0	0	0	0	8033.74	0	0	0
C1QTNF5	Matrisome-associated	ECM-affiliated Proteins	GO:CC not extracellular matrix	A0A8W4FEH2	A0A8W4FEH2	A0A8W4FEH2_PIG	0	0	0	0	0	0	0	0	0	0	0	0	0	0	0	0	0	0	0	0	0	0	0	0	0	0	0	0	0	1540.35	0	0	0	0	0	0	0	0	0	3126.16	0	1587.62	2929.57
C1R	Non-matrisome	Non-matrisome	GO:CC extracellular matrix (GO:0005576, GO:0005578 & GO:0031012) & GO:CC not extracellular matrix	A0A480RJC3	A0A480RJC3	A0A480RJC3_PIG	0	2369.98	0	0	5533.62	3864.62	11921.5	7204.59	10342.8	15792.1	11173.4	14792.6	10749.6	0	2151.13	9207.59	2688.35	0	2007.02	0	0	0	0	0	0	12796.3	6698.53	10209.3	10590.5	17251.3	9068.74	2321.59	0	0	0	0	2622.89	0	0	0	1980.38	0	0
C1S	Non-matrisome	Non-matrisome	GO:CC extracellular matrix (GO:0005576, GO:0005578 & GO:0031012) & GO:CC not extracellular matrix	A0A8W4FL59	A0A8W4FL59;Q69DK8	A0A8W4FL59_PIG	0	8926.75	11662.7	8149.14	13858.4	10021.2	21719.6	30986	25390.5	51643.2	43551.7	61316.6	24815.2	0	4491.59	0	8526.03	6273.06	4019.5	9728.24	10199.2	3907.38	4514.24	4634.82	3876.03	26966.1	28780.1	39628.6	18209.2	25980	14001	12427.6	6194.15	7567.42	3968.75	6659.85	6445.37	0	5959.49	0	0	3402.47	0
C2	Non-matrisome	Non-matrisome	GO:CC extracellular matrix (GO:0005576, GO:0005578 & GO:0031012) & GO:CC not extracellular matrix	F1RQW7	F1RQW7	F1RQW7_PIG	0	5992.04	8560.11	5742.28	20229.1	9156.48	22825.5	22517.8	13945.8	10949.5	29804.5	21798.3	26142.6	0	4127.11	10723	12581.4	8152.46	5876.96	1266.1	2165.16	1267.81	1339.31	2020.46	893.888	0	0	0	0	4313.44	0	1118.68	870.754	0	0	2110.61	0	7637.26	2044.89	0	0	4868.4	5767.12
C2CD2L	Non-matrisome	Non-matrisome	GO:CC not extracellular matrix	F1SAH4	F1SAH4	F1SAH4_PIG	0	0	0	993.697	0	459.377	0	0	0	0	3111.4	0	0	0	0	0	0	0	0	0	0	0	0	278.387	986.521	0	2762.71	0	0	0	0	0	1480.91	1033.68	0	1050.67	0	0	0	0	0	0	0
C2H11orf68	Non-matrisome	Non-matrisome	gene not present in GO IDs	F1RU27	F1RU27	F1RU27_PIG	0	2943.91	0	3776.57	3530.42	3246.23	0	0	0	0	0	0	2380.72	0	3235.53	0	4634.11	2348.77	3177.51	0	0	1657.21	1459.13	2272.88	0	0	0	0	0	1354.8	0	0	1273.43	0	0	1149.13	0	0	0	0	0	1866.38	0
C2orf69	Non-matrisome	Non-matrisome	GO:CC not extracellular matrix	A0A5G2R153	A0A5G2R153	A0A5G2R153_PIG	0	0	0	0	0	0	0	0	0	0	0	0	0	0	0	0	0	0	0	0	1555.88	915.544	590.929	779.374	779.483	0	0	0	0	823.43	0	0	789.061	0	0	0	1386.2	0	0	0	0	741.072	0
C3°	Non-matrisome	Non-matrisome	GO:CC extracellular matrix (GO:0005576, GO:0005578 & GO:0031012) & GO:CC not extracellular matrix	A0A8W4FDT9	A0A8W4FDT9	A0A8W4FDT9_PIG	0	6088.84	7744.56	7565.78	11577	5800.35	19481.8	30041.9	25110.4	31471.2	49509.1	62591.6	23870.4	0	3923.65	15043.3	8212.16	3658.74	6790.97	4883.36	18059.5	1369.92	2489.56	5240.25	4121.62	26391.4	49747.6	47781.5	28984.9	15721.5	29012.9	7603.77	2982.05	2399.63	4571.66	2059.24	2308.99	4640.38	3908.49	5515.53	7060.18	3583.36	4041.29
C3^	Non-matrisome	Non-matrisome	GO:CC extracellular matrix (GO:0005576, GO:0005578 & GO:0031012) & GO:CC not extracellular matrix	P01025	P01025;A0A8W4FDT9	CO3_PIG	0	46370.9	77894.8	62226.1	105772	48091.1	114144	131245	195259	90131.1	208794	167254	112034	22687700	50098.2	162439	99212.5	47604.9	53108.5	22267.9	63045.4	12264.5	22620	31746.6	29684.2	80358.8	143477	81618.5	58529.1	74457.9	51915.2	33270.4	25913.4	19660.2	21590.3	21268.9	27063.3	24996.3	36912.9	26646.4	27995.9	20154.6	23397.6
C4A	Non-matrisome	Non-matrisome	GO:CC extracellular matrix (GO:0005576, GO:0005578 & GO:0031012) & GO:CC not extracellular matrix	A0A5G2QCL1	A0A5G2QCL1	A0A5G2QCL1_PIG	0	43431.8	83690.1	70786.2	161716	105657	189237	164453	276538	312356	387082	221344	161838	0	48522.3	163176	108618	102115	55069.6	42630.3	78354.2	17184	31422	57882.3	27321.8	171773	354899	208070	187227	264001	142799	60097.8	33447	39798.5	34806.2	61948.1	47727.1	37205.7	42109.7	122345	75155.3	68094	44746.7
C4BPA^	Non-matrisome	Non-matrisome	GO:CC extracellular matrix (GO:0005576, GO:0005578 & GO:0031012) & GO:CC not extracellular matrix	F1S0J1	Q03472;F1S0J1	F1S0J1_PIG	0	0	0	0	1063.89	0	0	0	0	579.343	1598.62	0	0	0	0	0	0	0	0	0	0	0	0	0	0	0	6209.82	2526.12	4128.71	1017.44	2374.83	0	0	0	0	0	0	0	0	0	969.14	0	0
C4BPA°	Non-matrisome	Non-matrisome	GO:CC extracellular matrix (GO:0005576, GO:0005578 & GO:0031012) & GO:CC not extracellular matrix	A0A287BTH4	A0A287BTH4	A0A287BTH4_PIG	0	8774.49	20620.3	7022.7	27343	9668.54	31406.6	35311.1	93090	31592.7	56069.3	31637.2	32015.6	0	7274.5	0	10959.8	12774.1	4871.39	4689.09	37187.1	0	2341.39	5474.76	2677.33	116754	169216	57299.5	58538.4	86761.1	37281.4	16194.8	5894.99	8445.52	2984.63	4891.27	5044.58	5602.13	5775.23	0	6542.42	2834.58	3107.13
C4BPB	Non-matrisome	Non-matrisome	GO:CC extracellular matrix (GO:0005576, GO:0005578 & GO:0031012) & GO:CC not extracellular matrix	A0A287AL92	A0A287AL92	A0A287AL92_PIG	0	0	0	0	4145.66	1055.75	4291.71	0	7121.99	4405.38	4368.38	0	0	0	2744.88	0	0	0	0	0	0	0	0	0	0	7049.63	17810.6	6979.3	0	12800.8	0	1957.23	0	0	0	952.217	0	0	0	0	0	0	0
C4H8orf82	Non-matrisome	Non-matrisome	gene not present in GO IDs	F1RSQ0	F1RSQ0	F1RSQ0_PIG	0	4612.58	2208.26	2763.1	2805.44	2906.4	1332.86	0	0	0	0	0	0	0	6400.83	0	3828.02	2209.91	4427.39	2485.55	0	1665.22	2575.6	1928.69	1748.97	0	0	0	0	0	0	2408.64	3116.81	0	1567.99	1806.42	2436.17	0	2719.34	0	5177.44	1825.91	0
C4orf33	Non-matrisome	Non-matrisome	GO:CC not extracellular matrix	F1RRC4	F1RRC4	F1RRC4_PIG	0	565.956	0	0	0	830.382	0	0	0	0	0	0	0	0	914.197	0	939.408	2858.66	1073.43	0	0	0	0	0	0	0	0	0	0	0	0	0	0	0	0	0	0	0	0	0	0	898.796	0
C4orf54	Non-matrisome	Non-matrisome	gene not present in GO IDs	A0A8W4F6I7	A0A8W4F6I7	A0A8W4F6I7_PIG	0	2759.75	0	2308.4	0	3031.15	0	0	0	0	0	0	0	0	1521.04	0	1720.63	2426.31	4221.82	3274.04	0	3305.98	3536.64	3219.67	2333.39	0	0	0	0	0	0	1701.74	2689.68	2056.18	3454.38	2868.61	2780.95	0	2325.01	0	1906.18	3136.94	2201.37
C5	Non-matrisome	Non-matrisome	GO:CC extracellular matrix (GO:0005576, GO:0005578 & GO:0031012) & GO:CC not extracellular matrix	A0A287AIM8	A0A287AIM8	A0A287AIM8_PIG	0	2616.37	2697.63	2644.38	6824.16	2084.27	3434.6	6134.11	9444.11	4691.54	11294	8704.18	4625.02	0	1391.23	0	2934.18	1867.95	1517.86	2014.21	3194.16	1887.02	1409.88	1624.11	2150.81	11009.7	12027.1	8298.76	7264.27	4082.2	3548.94	2864.23	1639.24	1897.82	1781.38	1387.05	1844.56	3118.02	2172.24	0	0	1463.71	0
C6	Non-matrisome	Non-matrisome	GO:CC extracellular matrix (GO:0005576, GO:0005578 & GO:0031012) & GO:CC not extracellular matrix	A0A5G2R8T9	A0A5G2R8T9	A0A5G2R8T9_PIG	0	0	0	0	0	1989.4	0	0	4759.12	4273.51	5498.08	0	4708.65	0	0	0	1646.3	0	1812.44	0	0	0	0	0	0	7931.9	7374.06	0	0	3621.45	0	0	0	0	0	0	0	0	0	0	0	0	0
C6H19orf12	Non-matrisome	Non-matrisome	gene not present in GO IDs	A0A8W4FP51	A0A8W4FP51	A0A8W4FP51_PIG	0	4456.8	4169.85	4169	3005.23	3894.47	0	0	0	0	0	0	2184.59	0	5585.26	0	4156.25	2591.93	3004.16	6186.99	0	6093.18	9069.33	6719.6	7920.94	0	0	0	0	3533.77	0	3755.82	4893.45	2634.13	8169.5	4343.11	4025.93	5473.07	6822.07	6691.52	5677.24	7062.46	4564.43
C7	Non-matrisome	Non-matrisome	GO:CC extracellular matrix (GO:0005576, GO:0005578 & GO:0031012) & GO:CC not extracellular matrix	Q9TUQ3	F1SMJ1;Q9TUQ3	CO7_PIG	0	1473.31	0	4381.64	5371.31	2545.86	8514.77	3597.71	6434.24	6862.5	10538.1	7013.5	6277.27	0	1554.32	0	3840.12	2656.48	2582.84	0	4143.83	0	1068.75	999.623	1974.95	3779.54	10307.7	6486.91	5954.82	6459.85	0	2902.97	1502.66	1553.35	1485.88	936.476	0	3187.96	1700.88	0	0	2113.34	0
C7H6orf89	Non-matrisome	Non-matrisome	gene not present in GO IDs	A0A287B263	A0A287B263	A0A287B263_PIG	0	0	0	0	0	0	0	2559.5	0	1692.42	1343.17	1569.84	1041.32	0	0	0	0	0	0	0	0	0	0	0	0	0	0	1876.72	0	1181.65	0	0	0	431.088	0	394.25	0	0	0	0	0	0	0
C8A	Non-matrisome	Non-matrisome	GO:CC extracellular matrix (GO:0005576, GO:0005578 & GO:0031012) & GO:CC not extracellular matrix	F1S788	F1S788	F1S788_PIG	0	0	1791.5	0	4013.19	1922.39	3774.52	4297.09	5408.26	4092.15	6495.52	3566.76	3601.84	0	863.517	0	2488.12	0	915.459	0	0	0	0	0	0	0	2331.67	0	0	1060.96	0	0	0	0	0	0	0	0	0	0	0	0	0
C8B	Non-matrisome	Non-matrisome	GO:CC extracellular matrix (GO:0005576, GO:0005578 & GO:0031012) & GO:CC not extracellular matrix	A0A287AT36	A0A287AT36	A0A287AT36_PIG	0	2467.06	2808.46	2442.79	6633.19	2467.73	7473.69	8531.99	12304.4	4856.14	14181	14576.4	7364.54	0	2279.58	0	3842.91	1671.13	2524.29	0	2506.85	0	1156.82	1957.23	1135.08	9630.83	9997.29	4999.99	0	3280.2	0	2877.93	974.634	1455.71	1328.53	1448.81	1006.31	0	1453.05	0	2571.83	1701.61	0
C8G	Non-matrisome	Non-matrisome	GO:CC extracellular matrix (GO:0005576, GO:0005578 & GO:0031012) & GO:CC not extracellular matrix	A0A287AFQ4	A0A287AFQ4	A0A287AFQ4_PIG	0	3025.38	5673.85	7212.65	10923.5	4451.26	14798.8	12297.8	21620.5	16071.9	31391.4	18765.4	14623.8	0	2128.47	12337.8	7228.72	5538.46	4707.3	2306.2	6559.03	786.432	1252.92	2647.19	2403.62	7181.06	16288.6	8281.62	6869.56	7434.8	4692.24	2269.33	2238.39	2043.85	3209.19	1194.1	2045.96	0	0	0	2332.97	0	0
C9	Non-matrisome	Non-matrisome	GO:CC extracellular matrix (GO:0005576, GO:0005578 & GO:0031012) & GO:CC not extracellular matrix	A0A8W4F8A6	A0A8W4F8A6	A0A8W4F8A6_PIG	0	2260.83	4888.68	7218.99	8798.58	6520.16	11109.3	7973.6	15572.3	16741.3	15960.8	24391.3	10148	0	4501.95	0	6356.22	4791.19	4656.83	3681.36	11020.3	1254.58	2116.22	4844.91	1581.51	9585.82	18775	15959.4	10261	10034	8095.12	3801.01	3336.23	4846.82	2326.91	3539.23	1636.46	2468.43	3683.81	0	6221.69	4827.7	3565.64
CA1	Non-matrisome	Non-matrisome	GO:CC not extracellular matrix	A0A287AI92	A0A287AI92	A0A287AI92_PIG	0	5415.25	8732.8	7930.75	8654.17	13300.2	7576.87	10284.3	8324.28	8558.02	7562.48	14730.7	7676.33	0	8633.23	15313.3	14205.1	12692	7091.15	0	0	0	559.526	3281.14	588.353	0	0	0	0	2146.11	0	0	1389.92	543.679	0	1397.5	0	0	884.159	0	0	0	0
CA14	Non-matrisome	Non-matrisome	GO:CC not extracellular matrix	A0A287B0I5	A0A287B0I5	A0A287B0I5_PIG	0	84965.5	85141.9	144688	19958.9	87067.3	35139.8	9866.38	0	0	0	0	15892.1	0	95736.3	0	106198	53004.6	113365	33753.3	91600.8	32490.2	37465.1	54511	59363.3	0	0	0	54360.8	15849.9	36357	105562	120010	72042.5	43652.5	43269.4	45810.6	563697	405559	348764	269617	165937	350743
CA2	Non-matrisome	Non-matrisome	GO:CC not extracellular matrix	F1RXC2	F1RXC2	F1RXC2_PIG	0	4994.68	9213.34	8668.85	7161.65	7521.76	8513.84	8989.16	8044.49	4996.66	9158.25	12894.1	7054.89	0	8479.59	8931.32	13235.1	6427.13	7014.62	0	0	0	1281	2431.22	0	0	0	0	0	2382.54	0	1114.74	1832.71	1267.04	0	1600.13	0	0	1538.53	0	0	0	0
CA3	Non-matrisome	Non-matrisome	GO:CC not extracellular matrix	Q5S1S4	Q5S1S4	CAH3_PIG	0	1013180	3351630	2785730	1627390	1961490	1186760	564762	699157	333783	171671	904629	306822	0	2069360	242714	3206680	2374720	1827170	244797	232036	122197	264772	725278	173457	204546	168469	131661	167975	123717	103207	94647.8	515239	325822	221792	727628	70773.9	437856	748665	502921	474473	371233	374102
CA4	Non-matrisome	Non-matrisome	GO:CC not extracellular matrix	F1S1C3	F1S1C3	F1S1C3_PIG	0	4648.66	5362.69	4082.55	2082.61	4775.91	0	0	0	0	0	0	0	0	4918.7	19127.2	4618.48	5279.63	5160.98	7230.81	9302.97	1326.17	0	4231	1765.98	0	0	0	0	2311.3	0	3308.75	3835.84	3203.97	1463.26	4356.74	2070.29	36965.2	49166	32239.1	16770	14595.7	13886.3
CAB39	Non-matrisome	Non-matrisome	GO:CC extracellular matrix (GO:0005576, GO:0005578 & GO:0031012) & GO:CC not extracellular matrix	F1SMX5	F1SMX5	F1SMX5_PIG	0	11427.2	14327.3	14609.8	12867.9	11498.6	7179.46	12419.5	6613.56	4558.73	8239.06	10653.9	5819	0	13163.8	0	17354.7	11107.3	9642.08	3483.11	9521.71	7338.83	11451.5	10998.3	8140.45	0	0	6619.99	9435.61	4398.64	5617.41	8383.87	8418.28	4654.43	12860.6	8127.68	6636.56	7412.86	6977.33	7131.28	7900.67	6415.72	6089.71
CAB39L	Non-matrisome	Non-matrisome	GO:CC not extracellular matrix	A0A4X1SLB8	A0A4X1SLB8	A0A4X1SLB8_PIG	0	9769.86	11526.3	12727.7	13994.5	8121.41	0	0	4354.54	0	0	3984.44	0	0	16789.6	0	0	5577.06	6750.54	0	8363.25	4713.39	0	0	0	0	0	0	0	0	0	5372.66	8293.81	0	0	0	0	0	0	0	0	0	0
CACNA1B	Non-matrisome	Non-matrisome	GO:CC not extracellular matrix	A0A287APC1	A0A287APC1	A0A287APC1_PIG	0	0	0	0	0	0	2393.47	0	0	0	0	0	0	0	0	0	0	0	0	0	0	0	0	0	0	9885.45	0	0	0	0	0	709.996	0	1983.17	1462.61	0	0	0	0	0	0	0	0
CACNA1S	Non-matrisome	Non-matrisome	GO:CC not extracellular matrix	A0A5G2QW60	A0A5G2QW60	A0A5G2QW60_PIG	0	7336.29	17232.1	11877.8	7187.54	11318.2	5755.84	0	3220.01	0	0	3767.08	5037.48	0	9304.24	19231.3	15790.4	9233.87	11557.3	14519.7	26347.5	18047.2	27848.4	21094	21743.9	0	0	0	8081.12	1288.19	0	12157.5	18522.1	14941.6	22419.3	12727	20893.2	17913.7	18913.5	19199.6	19648.1	17060.1	16051.1
CACNA2D1	Non-matrisome	Non-matrisome	GO:CC not extracellular matrix	A0A287BIN3	A0A287BIN3	A0A287BIN3_PIG	0	33585.2	27198.7	24842.9	12632.6	21131	12244.7	7759.73	14428.6	10097.5	10421.9	15060.4	12326.7	3223960	26185.4	13002.7	17610	15538.8	19756.1	28157.1	24633.4	7261.83	13093.2	17686.7	8405.78	18618.6	22946.2	17726.3	18228.4	10731.4	16462.9	17907.3	21098.5	17470.2	16474.1	15304.2	14161.7	15298.5	15270.6	11378.2	10730.1	10916.4	11729.1
CACNB1	Non-matrisome	Non-matrisome	GO:CC not extracellular matrix	F1RWK8	A0A5G2Q732;F1RWK8	F1RWK8_PIG	0	20472.9	24684.6	20981.9	9911.13	16231.5	9789.91	0	4366.04	0	0	0	7681.9	0	20175	23483.7	16697.3	14724.5	15695.7	11433.8	13200.4	12921.6	18408.9	20855.7	14783.8	0	0	0	25900.7	2411.26	13217.9	16714.6	19914.7	8971.52	17790.9	15418.4	16594.6	13616.9	16788.4	10887.4	10853.9	12450.3	12601
CACNB3	Non-matrisome	Non-matrisome	GO:CC not extracellular matrix	A0A286ZP06	A0A286ZP06	A0A286ZP06_PIG	0	5513.63	0	5252.04	0	0	1418.25	0	0	0	0	0	1173.04	0	0	0	0	2840.27	0	3373.82	2757.33	3010.85	0	0	0	0	0	0	0	0	0	0	0	2300.41	0	0	4900.48	4565.26	5677.34	0	0	3038.83	3793
CACNG1	Non-matrisome	Non-matrisome	GO:CC not extracellular matrix	Q2MJQ7	Q2MJQ7	CCG1_PIG	0	1475.22	1565.88	2652.72	1178.77	0	0	0	0	0	0	0	0	0	2016.48	0	1081.07	1315.27	1415.2	0	0	0	0	0	0	0	0	0	0	0	0	1550.08	2003.69	2196.66	0	1065.65	0	7522.47	5476.37	6089.09	5828.18	2632.54	5639.19
CACYBP	Non-matrisome	Non-matrisome	GO:CC not extracellular matrix	F1S710	F1S710	F1S710_PIG	0	1375	4641.78	2592.53	3577.99	2154.19	6429.14	0	0	3229.53	0	0	4892.92	0	1786.26	0	2767.23	3298.53	2325.9	0	0	605.875	474.363	2076.18	0	0	0	0	0	4141.86	0	0	793.136	0	2171.98	1236.79	0	0	932.637	0	0	0	0
CAD	Non-matrisome	Non-matrisome	GO:CC not extracellular matrix	I3LLT2	I3LLT2	I3LLT2_PIG	0	0	0	0	2129.5	0	3325.72	5885.08	5018.88	4939.11	7247.29	4606.54	4343.9	0	0	0	0	0	0	4160.45	2219.61	0	1131.13	0	0	11103.5	10733.7	11105.8	10634.3	9852.83	6913.97	2248.75	1118.97	1546.28	1428.29	1460.18	692.777	0	811.292	0	1523.44	1328.51	0
CADM1	Non-matrisome	Non-matrisome	GO:CC not extracellular matrix	A0A5G2QPJ4	A0A5G2QPJ4	A0A5G2QPJ4_PIG	0	837.156	0	0	0	0	0	0	0	3887.88	0	0	1590.32	0	0	0	0	0	0	0	0	0	0	0	0	0	2324.35	4168.09	0	2441.16	0	0	0	0	0	0	0	0	0	0	0	0	0
CADM2	Non-matrisome	Non-matrisome	GO:CC not extracellular matrix	F1SK66	F1SK66	F1SK66_PIG	0	0	0	0	0	0	0	0	0	0	3497.54	0	0	0	0	0	0	0	0	0	0	0	0	0	0	3444.41	0	5573.12	0	1459.94	0	0	0	0	0	0	0	0	0	0	0	0	0
CADM3	Non-matrisome	Non-matrisome	GO:CC not extracellular matrix	A0A287AKF6	A0A287AKF6	A0A287AKF6_PIG	0	0	0	0	0	0	0	5098.89	0	1871.91	3355.37	0	0	0	0	0	0	0	0	1435.34	0	0	0	0	0	0	0	0	0	0	0	0	0	0	0	0	0	0	0	0	0	0	0
CALD1	Non-matrisome	Non-matrisome	GO:CC not extracellular matrix	A0A8W4F6D0	A0A8W4F6D0	A0A8W4F6D0_PIG	0	9741.88	8915.53	11150.4	8053.09	7954.28	9009.03	15604.9	13157.8	19569	17618.8	13755.4	16820.2	0	7513.15	11333.4	7809.83	6855.72	6948.19	5433.31	2779	3656.31	3733.28	7184.26	3668.84	1925.33	0	0	0	3396.89	0	2693.76	3382.01	2143.06	3982.02	4474.87	2269.83	0	3498.11	0	0	6922.26	0
CALHM5	Non-matrisome	Non-matrisome	GO:CC not extracellular matrix	A0A286ZV34	A0A286ZV34	A0A286ZV34_PIG	0	2635.42	0	0	4772.42	0	11606.8	11895.6	11366.2	15468.6	19533.1	9731.1	11702.9	0	0	0	0	0	0	3400.07	8391.04	0	0	0	0	12023.8	11558.7	18329.8	13655.2	3295.07	0	0	0	1877.56	0	1645.51	0	0	0	0	0	0	0
CALR	Non-matrisome	Non-matrisome	GO:CC extracellular matrix (GO:0005576, GO:0005578 & GO:0031012) & GO:CC not extracellular matrix	P28491	P28491	CALR_PIG	0	40500.7	48738.9	66159.3	58654	59831.6	80449.3	81874.9	43172.5	126277	103489	75905.9	121315	0	39175.7	10438.5	79456.7	60258	50927.3	59687.2	76578.6	25335.6	27884.8	46587	32936.1	43635.2	57344.2	89618.4	37494	76949.1	35378.1	16937	28070	29147.1	37468.1	32702.2	21686.4	22465.6	11987.4	26479	15668.8	16011.9	15329.6
CALU	Non-matrisome	Non-matrisome	GO:CC extracellular matrix (GO:0005576, GO:0005578 & GO:0031012) & GO:CC not extracellular matrix	A0A8D0QQ23	A0A8D0QQ23	A0A8D0QQ23_PIG	0	20353.4	32228.8	23519	23784.9	19638.5	20357.9	13979	19200.7	28358.4	20513.9	36790.1	34878.7	0	26965.2	72990.4	23730.5	15538.7	17348.5	32216.9	45905.8	34442.8	23592	32274.1	33201.7	32594.9	12448.9	32135.6	0	34258.3	21631.2	7292.32	20722	20286.9	33444.3	23139.5	19695.7	7887.63	9397.69	0	6066.92	7723.07	0
CAMK1	Non-matrisome	Non-matrisome	GO:CC not extracellular matrix	A0A287AZS7	A0A287AZS7;I3LNH4	A0A287AZS7_PIG	0	761.227	0	0	685.189	0	1660.52	0	0	0	3617.41	0	1819.3	0	352.755	0	0	0	0	1456.1	0	0	911.711	0	1203.3	0	0	0	0	5203.66	2910.93	0	719.359	928.054	0	875.254	0	0	0	0	0	0	1156.23
CAMK2A	Non-matrisome	Non-matrisome	GO:CC not extracellular matrix	I3LNG5	I3LNG5	I3LNG5_PIG	0	41573.2	59340.1	58555.9	11681	34512.1	33006.6	0	4565.6	0	0	0	9395.2	0	24535.3	0	35102.9	27114.7	13849.9	76232	187771	29045.4	74369.9	75433.3	64824.1	0	7907.72	0	52737.2	5284.97	32512.4	74811.6	109833	68133.1	60159.6	60600.4	82046.7	139552	151319	113441	58596.7	100567	91728.8
CAMK2B	Non-matrisome	Non-matrisome	GO:CC not extracellular matrix	A0A287AGQ9	A0A287AGQ9	A0A287AGQ9_PIG	0	1579.18	2328.44	2673.8	0	2129.44	0	0	0	0	0	0	0	0	1201.26	0	0	3203.88	2031.51	6787.49	14928.5	1710.67	5420.39	1261.55	3725.41	0	0	0	5791.15	0	0	9798.42	2749.46	2453.48	10670.9	1903.94	5257.2	9566.03	3636.04	3195.42	6053.89	3502.25	5121.73
CAMK2D	Non-matrisome	Non-matrisome	GO:CC not extracellular matrix	Q95266	A0A5G2RCS0;Q95266	KCC2D_PIG	0	17749	17389.7	18368.1	10332	14953.9	17229.8	19901.2	16162.5	15827.6	20878.5	9998.28	17607.8	0	8010.28	0	9192.57	18143.2	8790.19	27706.3	19016.3	15937.5	23790.7	10707.2	15114.2	31752.8	15087.2	19248.5	21744.1	24263.3	23395.2	32563	31533.6	34348.8	17285.5	28122.2	22138.7	34403.9	28389.3	27708.7	30738.2	28567.8	26899.9
CAMK2G	Non-matrisome	Non-matrisome	GO:CC not extracellular matrix	A0A287BCC5	A0A287AGQ9;A0A287BCC5	A0A287BCC5_PIG	0	8901.91	8920.12	16823.5	5146.7	12660	8936.13	6684.14	7018.21	5298.71	7466.98	0	9628.04	0	5575.79	0	7627.94	11935.3	7771.82	22294.6	19728.2	15246.3	19120.4	11615.3	16632.7	12809.8	6797.22	9407.34	17959.2	11794.2	13254.7	30669.4	25851.2	22719.8	18809.8	23092.2	24553.1	27281.8	19641.3	18736.9	18311.5	22593.1	24801.6
CAMKK2	Non-matrisome	Non-matrisome	GO:CC not extracellular matrix	F1RNP6	F1RNP6	F1RNP6_PIG	0	0	0	0	0	0	0	2839.73	1611.69	0	0	0	0	0	0	0	0	0	0	0	0	0	0	0	0	0	2951.93	4895.38	3455.33	885.882	0	0	0	0	0	0	0	0	0	0	0	0	0
CAMLG	Non-matrisome	Non-matrisome	GO:CC not extracellular matrix	A0A287AAY2	A0A287AAY2	A0A287AAY2_PIG	0	0	0	0	0	0	0	0	0	0	0	0	0	0	0	0	0	0	0	0	0	0	0	0	0	0	0	0	0	0	0	0	0	0	0	0	0	0	0	4822.55	0	0	0
CAMSAP2	Non-matrisome	Non-matrisome	GO:CC not extracellular matrix	I3LLX3	I3LLX3	I3LLX3_PIG	0	0	0	0	1764.89	679.038	2607.41	2686.67	0	0	3012.55	7917.08	4779.07	0	0	0	0	0	0	0	0	0	0	0	0	0	0	0	0	0	0	0	0	0	0	0	0	0	0	0	0	0	0
CAND1	Non-matrisome	Non-matrisome	GO:CC extracellular matrix (GO:0005576, GO:0005578 & GO:0031012) & GO:CC not extracellular matrix	F2Z5R6	F2Z5R6	F2Z5R6_PIG	0	7962.18	6726.29	8615.9	13101.3	7381.45	11796.8	13343.4	15723.9	16350.6	21783.7	24761.5	13164.1	0	8493.51	70103.6	6025.9	7776.48	8227.12	7527.32	9231.87	1546.68	2445.89	2837.69	2788.41	35498.3	32632.8	24819	23573.2	24852.9	18627	4438.84	4679.27	6720.57	2829.8	5702.21	3435.95	8975.85	5455.99	5182.49	8462.19	4811.73	4920.77
CAND2	Non-matrisome	Non-matrisome	GO:CC not extracellular matrix	F1SQ89	F1SQ89	F1SQ89_PIG	0	18860	15754.8	35584	10356.5	22659.5	12881.6	14105	9768	9932.35	9741.36	15849.3	12471.2	0	14842.3	21975.9	16024.7	18411.5	17084	34468.4	17674.4	18989.5	33075.2	17458.5	28737.7	36073.5	17374.5	26410.3	23940.6	13283	24622.3	62424.3	63021.2	56558	24677.1	45234.9	39789.2	67047.7	52914.2	64763.1	70818	50069	47066.6
CANX	Non-matrisome	Non-matrisome	GO:CC not extracellular matrix	A0A4X1VV61	A0A4X1VV61	A0A4X1VV61_PIG	0	23129.8	23006	14536.7	24894.9	12699.8	31168.2	35758.7	25501.4	29861.2	37365.8	36282.6	40353.3	0	17049	40105.3	13848.7	11253.2	12229.2	17439.1	25588.1	7031.43	12133.5	10090.3	10446.8	36147.7	24124.3	31332.5	40903.8	45023	40027.3	13148.2	15691.3	18540.6	17742.1	15343.8	13249.3	28529.6	21317.5	24421.1	23069	18632.4	25242.5
CAP1^	Non-matrisome	Non-matrisome	GO:CC extracellular matrix (GO:0005576, GO:0005578 & GO:0031012) & GO:CC not extracellular matrix	P40125	F1SMC0;P40125	CAP1_PIG	0	1578.15	0	1283	2171.36	0	0	0	0	0	0	0	0	0	1482.95	0	1235.48	0	0	0	0	0	0	0	0	0	0	0	0	2686.69	0	0	0	0	0	369.927	0	0	0	0	0	0	0
CAP1°	Non-matrisome	Non-matrisome	GO:CC extracellular matrix (GO:0005576, GO:0005578 & GO:0031012) & GO:CC not extracellular matrix	F1SMC0	F1SMC0	F1SMC0_PIG	0	21845.6	29226.3	46309.4	34602.6	29415.3	66751.8	90802.6	35184.3	88369.7	63214.7	154745	53127.8	0	30473.1	23755.1	31927.7	26159.7	36610.8	7533.09	23671.4	10717.5	6744.34	20392.7	19654	78284	14736.1	46891	13007.9	48179.1	14381.4	7598.28	9751.3	9451.65	12895.4	13116.7	15406.5	7057.08	11365.3	4586.79	9940.99	8737.45	12215
CAP2	Non-matrisome	Non-matrisome	GO:CC not extracellular matrix	F1RUJ0	F1RUJ0	F1RUJ0_PIG	0	61244.9	54458.4	54405.4	52549.4	51658.2	27897.8	17566.3	16418.3	18698.4	11192.7	44468.4	12437.1	0	63410.5	55291.2	72116.8	40421.2	56489.5	19237.9	44350.5	129722	93674.2	84133.9	97061.5	11105.6	4968.29	10587.5	11417.6	7460.68	12681.1	28134.9	42808.9	43436.6	85740.9	43271.4	55517.6	36583.7	34882.8	36429.5	41415.4	38933.7	40735.3
CAPG	Non-matrisome	Non-matrisome	GO:CC not extracellular matrix	A0A287B8B6	A0A287B8B6	A0A287B8B6_PIG	0	3011.09	2203.18	2673.01	3516.83	3862.69	4599.57	6146.9	0	4327.17	6410.94	0	4443.52	0	1470.19	0	2676.26	2907.94	2082.9	0	0	0	706.307	998.907	0	0	0	0	0	0	0	0	1291.41	0	0	1784.22	0	0	0	0	0	0	0
CAPN1	Non-matrisome	Non-matrisome	GO:CC extracellular matrix (GO:0005576, GO:0005578 & GO:0031012) & GO:CC not extracellular matrix	P35750	A0A5S6GBZ7;P35750	CAN1_PIG	0	21611.1	29497.3	29902.7	25981	24707.6	35674	33907.6	21414.2	23847.5	30683.8	33507.6	27862.8	0	25569.9	73727.7	32962.9	23160.6	26613.5	13520.1	18524.8	4469.43	4797.02	14194.3	7191.91	10347.1	15802.5	15280.2	16895.7	16571.2	11472.2	8008.84	12764.5	13346.8	10503.4	14144.5	6598.81	22475.7	15878.3	17290.4	13920	17230.7	16784.8
CAPN2^	Non-matrisome	Non-matrisome	GO:CC not extracellular matrix	A0A5G2QPE1	A0A5G2QPE1	A0A5G2QPE1_PIG	0	12165.9	15574.4	19199.5	18541.9	11799	22580.3	21863.1	25766.1	24645.8	24289.2	15936.3	17076.8	0	10580.4	0	13670.9	13384.5	13560.1	13507.8	23984.6	3336.98	4032.13	5527.99	7714.84	23829.1	50459.6	31336.5	23742.5	35380.3	23186	6641.32	7395.11	11673.6	7118.48	7593.65	7068.87	13835.9	12812.7	17699.3	14488.3	12810.6	14179.3
CAPN2°	Non-matrisome	Non-matrisome	GO:CC not extracellular matrix	P43367	P43367;A0A5G2QPE1	CAN2_PIG	0	24081	49446.5	31976.2	56969.6	19686.2	79089	41221.7	64901.1	64737.3	47804.8	101803	47660.2	0	24111.4	208151	24116.8	24242.7	23152.4	31818.7	78866.6	6523.18	6243	11058.5	11219.5	144341	64865.7	144172	113919	73845.3	88883.2	15009.1	14981.5	21246.1	15460.8	18132.5	13006.8	43686.8	32468.5	22006.5	29045.8	32768.9	38885.6
CAPN3	Non-matrisome	Non-matrisome	GO:CC not extracellular matrix	P43368	P43368	CAN3_PIG	0	23407.3	51722.3	39803.7	18905	35458.4	23477	6842.31	6692.79	5527.75	0	8693.19	5148.12	7330380	24642.1	66706.8	37185.1	40451.8	30063.5	10531.3	50691.5	10216.8	11710.1	25184.1	14237.5	0	0	0	0	2462.47	0	10685	27313.9	18538	18143.7	18716.1	14437.7	16075.8	25933	16936	10989.8	19285.5	20773.9
CAPN5	Non-matrisome	Non-matrisome	GO:CC not extracellular matrix	F1SUK6	F1SUK6	F1SUK6_PIG	0	2375.95	0	0	2084.17	0	0	4128.01	1797.11	3954.85	4558.44	0	3031.18	0	510.798	0	0	0	0	0	0	0	0	0	5187.27	0	0	0	0	0	0	0	0	0	0	1046.27	0	0	0	0	0	0	0
CAPN6	Non-matrisome	Non-matrisome	GO:CC not extracellular matrix	F1RWU4	F1RWU4	F1RWU4_PIG	0	0	0	0	0	0	2953.82	1863	2859.03	2721.96	6471.04	5334.69	2978.52	0	1043.94	0	0	0	0	0	0	0	0	0	0	0	4638.72	3630.93	2530.15	5058.43	0	0	0	0	0	0	0	0	0	0	977.574	912.228	0
CAPN7	Non-matrisome	Non-matrisome	GO:CC not extracellular matrix	A0FKG7	I3LBF0;A0FKG7	CAN7_PIG	0	1079.48	0	0	1046.66	911.017	1529.82	0	0	0	0	0	1231.4	0	668.172	0	755.628	424.741	0	1472.97	0	0	606.787	0	1034.71	3846.98	0	0	0	2050.68	0	1670.46	0	1052.3	0	990.003	0	0	0	0	0	1265.53	0
CAPNS1	Non-matrisome	Non-matrisome	GO:CC not extracellular matrix	P04574	P04574;A0A5S6GT88	CPNS1_PIG	0	17056.2	17660.6	14686.9	25002.2	15492.3	17075.6	23818.3	20210.6	27685.6	23228.7	21418.5	17836.3	1902290	17246.4	0	24160.5	11588.7	15545.8	14504.4	7994.78	7067.24	8377.2	15057.5	6889.49	9654.29	20961.8	14990.6	14894.3	16453.9	9652.8	5330.09	7658.74	9243.4	8214.75	11280.8	5196.51	7265.66	10188.4	5647.15	10084.1	7360.04	6365.98
CAPRIN1	Non-matrisome	Non-matrisome	GO:CC not extracellular matrix	F1SGS6	F1SGS6	F1SGS6_PIG	0	2741.89	3374.41	2860.03	2090.97	2321.09	3037.64	1587.85	2755.6	1981.08	3663	0	2866.2	0	2916.23	0	1935.6	2884.28	2810.21	2821.83	3611.23	3599.59	3952	2983.46	3933.38	0	0	3610.04	0	5787.92	0	2328.77	3509.89	2937.54	4588.03	2579.62	3295.05	2229.99	1870.23	0	0	1269.44	1640.89
CAPZA1	Non-matrisome	Non-matrisome	GO:CC extracellular matrix (GO:0005576, GO:0005578 & GO:0031012) & GO:CC not extracellular matrix	A0PFK5	A0A8W4FH92;A0PFK5	CAZA1_PIG	0	7283.12	5330.33	6193.79	10099	6261.32	5480.22	14837.5	14799.2	19754.3	12601.1	18011.2	10675.6	0	6822.03	0	7207.1	4658.86	4084.07	11947	6240.73	10886.4	9303.79	9261.04	9169.59	7004.13	0	6789.92	0	12599.8	0	4482.85	4551.8	3746.05	7468.6	5535.36	5696.16	0	3340.81	0	3530.6	3032.55	0
CAPZA2	Non-matrisome	Non-matrisome	GO:CC extracellular matrix (GO:0005576, GO:0005578 & GO:0031012) & GO:CC not extracellular matrix	Q29221	Q29221	CAZA2_PIG	0	96254.5	53107.6	78626.9	39547.6	64901.1	36118.4	38219.9	32820.5	35183.8	40678.4	27759.1	30039.1	0	76302.8	14391.8	65089.3	43655	64305.9	194003	91345.8	148278	179447	174039	166616	19912.5	20776.3	23273.1	48836.7	45625.6	37442	82918.9	125667	83849	134258	76028.2	121344	57714.4	54730.2	56575.3	53310.9	51140.2	49850.6
CAPZB^	Non-matrisome	Non-matrisome	GO:CC not extracellular matrix	A0PFK7	A0A5K1U188;A0PFK7	CAPZB_PIG	0	81709.8	72706.7	84315.8	36577.8	78080.3	43289.8	46181.8	39070.2	49464.6	53086.3	34080.3	38508.4	0	61210.5	15931.3	62653.2	62489.7	71945.9	95635.6	50377.3	138146	120931	119883	131289	26345.6	25948.9	23842.8	29695.5	22289.4	30719.4	98898.2	106497	69259.2	91999.2	76547.1	104846	34294	29808	43980.9	32889	47787.3	36131.9
CAPZB°	Non-matrisome	Non-matrisome	GO:CC not extracellular matrix	A0A5K1U188	A0A5K1U188	A0A5K1U188_PIG	0	57812.6	54034.1	51266.7	19672.2	44429.1	26110.6	0	13462.4	0	4994.36	21703.8	11979.6	0	29154.6	75640.6	40013.4	41291.2	39869.7	62720.4	41722.8	88872.9	89912.5	82053.5	62504.3	0	0	0	21102.2	0	21535.2	71926.3	89016.9	56755.2	60596.4	68691.1	74303.9	12775.9	24051.9	14929.3	9377.17	32344.5	22233.9
CARD19	Non-matrisome	Non-matrisome	GO:CC not extracellular matrix	A0A286ZVX0	A0A286ZVX0	A0A286ZVX0_PIG	0	3261.56	0	0	0	1846.8	0	0	0	0	0	0	0	0	2222.32	0	2044.3	0	1700.77	4372.13	0	3116.24	2755.78	2632.76	1675.22	0	0	0	0	2254.23	0	0	3002.4	3435.32	2747.13	3991.76	2488.23	5908.28	4762.88	5872.74	12470.5	4759.64	5173.16
CARHSP1	Non-matrisome	Non-matrisome	GO:CC not extracellular matrix	A0A4X1VPW4	A0A4X1VPW4	A0A4X1VPW4_PIG	0	2284.82	3066.34	2373.39	4809.63	3260.34	3077.68	2105.35	0	3608.22	3516.66	0	5047.5	0	3386.96	0	4101.3	3689.46	5238.11	2465.39	0	1643.5	1467.07	3451.45	2499.19	0	0	0	0	6691.62	0	2734.63	1347.19	2032.04	3153.88	3457.73	2599.96	0	1800.47	0	0	2230.23	0
CARM1	Non-matrisome	Non-matrisome	GO:CC not extracellular matrix	F1S590	F1S590	F1S590_PIG	0	1805.07	0	2551.34	2125.96	2155.25	0	4950.83	2281.2	3945.88	4901.66	0	0	0	1625.17	0	2030.13	1765.61	1373.57	1215	0	0	0	2150.24	4299.25	0	4069.64	3193.4	0	3135.73	0	0	1154.93	2277.9	1971.1	2363.33	0	0	1847	1383.62	0	2770.4	0
CARNMT1	Non-matrisome	Non-matrisome	GO:CC not extracellular matrix	F1SJA3	F1SJA3	F1SJA3_PIG	0	0	0	0	1027.49	1205.6	0	0	0	0	0	0	0	0	1063.77	0	0	0	0	0	0	0	0	0	667.505	0	0	0	0	0	0	0	0	0	0	1002.6	0	0	700.016	0	1672.26	874.834	0
CARNS1	Non-matrisome	Non-matrisome	GO:CC not extracellular matrix	F1RUY9	F1RUY9	F1RUY9_PIG	0	13940.2	14090	24587.6	8123.08	12826.9	9266.61	5636.87	3460.75	1714.21	0	6993.89	2318.65	0	14772.5	0	10390	10423.4	14773.5	8052.51	13365.8	6667.85	11795.2	11001.7	10312.3	9590.89	0	7333.18	6833	1414.76	4648.37	15950.5	25249.8	23426.5	6812.63	13228.4	14986.9	16579.7	16218.7	11689.4	13876.6	12446.4	12546.9
CARS1	Non-matrisome	Non-matrisome	GO:CC not extracellular matrix	A0A5G2QAK4	A0A5G2QAK4	A0A5G2QAK4_PIG	0	1435.58	2060.49	1532.56	3523.6	2078.44	4622.75	4707.94	3785.7	6295.84	7727.64	4524.43	2993.66	0	1384.41	0	1778.3	1572.89	1293.25	0	0	876.384	0	0	1039.3	0	0	4343.8	0	3481.6	0	0	0	752.241	1247.93	987.259	0	0	923.152	0	0	0	0
CARS2	Non-matrisome	Non-matrisome	GO:CC not extracellular matrix	A0A5G2QSE4	A0A5G2QSE4	A0A5G2QSE4_PIG	0	1867.05	0	0	0	1109.05	0	0	0	0	0	0	0	0	971.62	0	0	0	1758.97	0	0	1436.08	1740.81	0	1661.51	0	0	0	0	841.303	0	0	1132.76	2037.57	1355.45	1213.75	1367.26	926.662	812.56	0	0	0	0
CASK	Non-matrisome	Non-matrisome	GO:CC extracellular matrix (GO:0005576, GO:0005578 & GO:0031012) & GO:CC not extracellular matrix	A0A8W4F8E2	A0A8W4F8E2	A0A8W4F8E2_PIG	0	1087.25	0	677.904	1983.22	626.701	2504.85	3340.67	2551.68	3371.82	5297.04	1919.18	1719.16	0	631.044	0	535.179	691.239	282.214	0	0	0	0	0	0	0	2676.56	3647.5	0	2193.39	0	0	0	0	0	498.527	0	0	419.15	0	488.241	368.543	0
CASP10	Non-matrisome	Non-matrisome	GO:CC not extracellular matrix	A0A8D1JAU4	A0A8D1JAU4	A0A8D1JAU4_PIG	0	0	0	0	0	0	0	0	0	0	0	0	0	0	0	0	0	0	0	412.398	0	0	0	0	0	2153.45	0	1950.75	0	1287.48	0	0	0	0	0	0	0	0	0	0	0	0	0
CASP3	Non-matrisome	Non-matrisome	GO:CC not extracellular matrix	Q95ND5	Q95ND5;A0A8D1LRN3	CASP3_PIG	0	2359.12	0	1950.05	2809.44	1831.86	0	2804.72	0	0	3245.49	0	0	0	1523.05	0	2196.93	1959.08	1614.88	0	0	1481.96	1775.32	0	2501.7	0	0	0	0	7705.66	0	0	0	1331.57	1928.86	1909.38	0	0	1985.8	0	0	1395.18	0
CASP6	Non-matrisome	Non-matrisome	GO:CC not extracellular matrix	A0A5G2QXI3	A0A5G2QXI3	A0A5G2QXI3_PIG	0	0	2680.72	5700.99	8438.3	3429.44	10903.3	6749.04	5880.16	10866.6	12590.5	11025.9	0	0	4368.48	9224.67	6643.47	3987.67	2503.9	0	0	0	0	0	0	17025.3	0	7203.06	0	8567.99	0	1881.04	0	546.609	0	1126.01	0	0	0	2369.34	1170.94	0	0
CASP7	Non-matrisome	Non-matrisome	GO:CC not extracellular matrix	K9J6J4	K9J6J4	K9J6J4_PIG	0	4932.37	4363.26	4302.72	6474.71	3891.33	6837.06	7812.83	4154.18	13693.6	5734.13	12383.3	4166.22	0	3596.81	0	5753.07	3514.54	2706.82	6383.78	5248.42	4407.8	5557	4960.11	4420.68	9090.51	6720.7	9566.7	2973.47	11393.7	4772.44	5362.68	3449.12	4773	5297.71	5875.26	3388.3	5125.81	2797.32	4141.09	5769.19	4592.76	3779.33
CASP8	Non-matrisome	Non-matrisome	GO:CC not extracellular matrix	Q56VC3	Q56VC3	Q56VC3_PIG	0	0	0	0	0	0	0	0	0	0	0	0	0	0	0	0	0	0	0	422.547	0	521.048	0	216.747	855.721	0	0	0	0	3100.83	0	0	0	456.24	0	0	0	2515.68	0	0	0	0	0
CASP9	Non-matrisome	Non-matrisome	GO:CC not extracellular matrix	F1SUV9	F1SUV9	F1SUV9_PIG	0	0	0	0	0	1336.51	1409.15	1640.27	0	891.303	3294.28	2774.6	0	0	0	0	0	1364.5	0	0	0	0	0	0	732.3	0	0	0	0	0	0	0	0	0	0	0	0	0	0	0	0	0	0
CASQ1	Non-matrisome	Non-matrisome	GO:CC not extracellular matrix	F1RJW7	F1RJW7	F1RJW7_PIG	0	595488	528485	940087	262265	549355	234193	54967	121078	32750.7	45065.8	211447	134182	0	504998	311584	642530	493836	630347	1531330	1343670	1090180	1075390	1360340	1343590	23467.7	72934.7	39981.4	275822	63295.7	224202	743573	1106330	991519	1066350	823089	1052410	101037	156738	135128	47762	62657	119067
CASQ2^	Non-matrisome	Non-matrisome	GO:CC not extracellular matrix	O18934	F1SAW8;O18934	CASQ2_PIG	0	31545.6	7459.07	10174.4	6016.56	11790.2	8829.78	0	2691.67	0	0	7271.63	6839.46	0	15312.5	0	9884.53	9823.63	11716.7	26433.5	22810.4	38823.4	39492.1	53335.2	24774.8	0	7941.74	0	29850.9	2426.77	15118.5	28463.8	45044.7	25130	41323.6	40911.8	34931.4	11963.1	12238.4	6935.68	8387.8	15103.9	10143.7
CASQ2°	Non-matrisome	Non-matrisome	GO:CC not extracellular matrix	F1SAW8	F1SAW8	F1SAW8_PIG	0	305426	217159	188790	71768.4	181775	86259.7	22545.8	23779.3	8594.31	17427.7	52952.2	55956.9	0	128605	112562	224996	163007	225292	522645	653161	731080	643455	560503	563200	27242.2	15886.4	11913.4	100586	27637.3	111903	630673	489328	409645	997118	507259	570677	241689	276696	150618	156405	239102	186064
CAST	Non-matrisome	Non-matrisome	GO:CC not extracellular matrix	P12675	F6PU32;P12675	ICAL_PIG	0	3679.07	3486.68	3018.45	3456.76	3143.96	4681.85	4637.46	4810.05	6104.41	4668.75	0	5809.18	0	3240.21	6884.94	3839.3	3237.06	2765.3	2126.39	0	0	0	1083.59	0	0	0	0	0	2883.29	0	0	0	0	0	1415.55	0	0	0	0	0	0	0
CASTOR2	Non-matrisome	Non-matrisome	GO:CC not extracellular matrix	A0A480MPK0	A0A480MPK0	A0A480MPK0_PIG	0	0	0	0	1166.05	994.021	0	0	0	0	0	0	0	0	1208.06	0	1391.9	0	1076.8	0	0	0	1454.39	0	0	0	0	0	0	0	0	0	0	1543.75	0	0	0	0	0	0	0	945.067	0
CAT^	Non-matrisome	Non-matrisome	GO:CC extracellular matrix (GO:0005576, GO:0005578 & GO:0031012) & GO:CC not extracellular matrix	A0A4X1SSR6	A0A4X1SSR6	A0A4X1SSR6_PIG	0	11791.1	20408.6	16231.1	17271	10099.1	10309.3	11359.3	11189.9	10213.2	8631.12	10778.5	11851.2	0	22211.6	25942.6	23966.3	9627.16	9479.51	5115.53	0	2730.78	2506.94	6743.13	0	7583.03	0	7468.74	0	5565.15	4499.29	2241.86	4677.27	3963.49	3404.66	4250.75	2428.98	7210.54	8032.59	0	4506.68	3650.63	0
CAT°	Non-matrisome	Non-matrisome	GO:CC extracellular matrix (GO:0005576, GO:0005578 & GO:0031012) & GO:CC not extracellular matrix	O62839	O62839;A0A4X1SSR6	CATA_PIG	0	9899.02	14256.6	14133.8	15413.6	9333.38	9000.37	10152.9	9905.19	6533.01	14134.1	12306	10974.2	0	18489.7	35945.7	20273.5	10790.4	11380.2	5948.72	7819.95	2494.38	2745.85	6656.74	2394.77	9541.52	7882.66	4566.2	5472.11	5629.37	0	3288.63	4812.48	3709.47	3659.33	4553.43	2521.47	5575.85	4122.91	0	3125.3	3640.71	3332.33
CAV1	Non-matrisome	Non-matrisome	GO:CC not extracellular matrix	Q6RVA9	Q6RVA9;A0A286ZJQ9	CAV1_PIG	0	27308.5	34870.2	28553.6	25291.2	24053.9	23410.7	67298.9	36430.8	48300.2	90994.7	33086.6	26714.1	0	13118.8	19260.1	17123.7	26379.5	18322.5	16993.7	14393.7	6438.48	7184.5	8207.25	9338.86	11103.8	100210	16959	14011.8	12057.6	12822.8	22950.4	28523.9	30072.3	6161.03	27760.7	12571.5	75659.1	62116.8	71098.6	70114.9	59969	45040.5
CAV2	Non-matrisome	Non-matrisome	GO:CC not extracellular matrix	Q2QLE2	Q2QLE2	CAV2_PIG	0	7375.1	4447.87	9107.3	6767.81	7327.33	8433.25	10263.1	6358.84	10028.4	19597.8	7388.59	9680.42	0	5098.2	0	6187	7680.52	9054.06	5732.88	6870.22	3227.61	2024.59	3025.98	4965.41	5136.32	45973.1	5812.82	6243.77	7423.8	4896.38	6342.65	7342.02	8806.57	3112.67	7809.83	3203.72	76896.3	26949.9	100982	50909.5	36115.4	31305.7
CAV3	Non-matrisome	Non-matrisome	GO:CC not extracellular matrix	Q3ZDQ5	Q3ZDQ5	CAV3_PIG	0	25315.8	0	3601.45	0	4896.54	0	0	0	0	0	0	0	0	19963.1	0	0	13837.2	3334.19	0	0	0	0	0	1800.67	0	0	0	0	0	0	0	4953.59	8451.06	0	10098.9	0	0	11683.7	1495.39	3120.29	3486.41	0
CAVIN1	Non-matrisome	Non-matrisome	GO:CC not extracellular matrix	A0A286ZZ97	A0A286ZZ97	A0A286ZZ97_PIG	0	187286	108974	132608	149804	124059	135924	151711	160628	221296	213306	152671	214473	0	141296	187501	140190	70396.2	107503	274639	167678	258208	195626	225237	225667	148685	199784	200432	134271	310168	258757	89834.2	146167	126484	172011	166632	151293	69185.6	130117	87996.9	58562.5	109730	89294.5
CAVIN2	Non-matrisome	Non-matrisome	GO:CC not extracellular matrix	I3LDR9	I3LDR9	I3LDR9_PIG	0	15267.2	17174.3	13993	22998.9	14154.9	11727	7911.3	18585.7	19694.1	16311	15321.4	23875.9	0	21252.1	5356.2	18990.6	6749.74	9538.3	41838.1	16697.1	28232.8	25901.8	20509.7	23401.9	16089.3	6385.94	13693	6392.19	12827.8	10546.5	10768.5	16961.5	14324.5	26388.9	16728.3	15467.7	18399.3	19429.8	12796.1	20094.6	17431.6	11231.3
CAVIN3	Non-matrisome	Non-matrisome	GO:CC not extracellular matrix	A0A5G2QWV6	A0A5G2QWV6	A0A5G2QWV6_PIG	0	13967	10947.8	7973.37	20455	10012.4	28337.9	30009.4	27139.8	44055.8	32609	23052.8	31663.3	0	24206.8	0	9225.09	6254.29	6213.15	31024.6	0	13758.1	11018.7	14335.7	15924.6	18218.7	39177.2	40781.3	0	31407.1	35901.9	0	9891.74	4623.38	11153.8	7053.29	8594.84	5956.67	7995.07	6362.51	4830.57	5025.05	0
CAVIN4	Non-matrisome	Non-matrisome	GO:CC not extracellular matrix	A0A4X1VEW6	A0A4X1VEW6	A0A4X1VEW6_PIG	0	33528.7	31045	28479.9	14934.6	25709.7	10672.4	0	6192.09	0	0	10835	2926.13	5821000	47455.7	14317.5	34187.7	23154.6	26676.1	27155	28203.1	24383.7	26704.4	26228.8	30517.6	0	0	0	0	0	8887.36	11117.6	18916.7	18703.1	18383.3	17602.4	16246.5	18955.6	11233.3	9024.57	15562.5	15762.2	15930.8
CBR2	Non-matrisome	Non-matrisome	gene not present in GO IDs	Q29529	Q29529;A0A287BT95	CBR2_PIG	0	3139.46	0	0	2506.78	2319.56	0	0	0	0	0	0	0	0	1666.83	0	2191.63	0	2324.43	4987.75	0	0	1362.73	1373.82	1304.12	0	0	0	0	2160.35	0	4956.9	0	4264.97	0	828.706	4836.93	0	0	0	0	0	0
CBR3	Non-matrisome	Non-matrisome	GO:CC not extracellular matrix	F1SGX4	F1SGX4	F1SGX4_PIG	0	1118.51	0	0	1711.74	1354.61	0	0	0	0	0	0	1328.72	0	1058.72	0	873.931	1049.83	1812.05	0	0	0	0	0	0	0	0	0	0	2587.2	0	0	408.118	1235.77	0	0	0	0	0	0	0	0	0
CBR4	Non-matrisome	Non-matrisome	GO:CC not extracellular matrix	F1RIX8	F1RIX8	F1RIX8_PIG	0	2627.19	0	3695.09	1930.04	2818.36	0	0	0	0	0	0	3104.21	0	3400.56	0	3595.66	3001.1	3811.31	4208.8	0	3210.82	3634.94	3450.54	2794.49	0	0	0	0	0	0	1767.27	2170.89	3196.25	2938.18	2858.24	2471.53	2099.69	2706.89	3408.37	3456.66	3090.7	2963.65
CBX1	Non-matrisome	Non-matrisome	GO:CC not extracellular matrix	F1RWH1	F1RWH1	F1RWH1_PIG	0	1739.63	1751.08	1856.41	2307.49	2085.45	1513.12	3171.73	2413.68	3860.52	2897.23	2304.91	1692.41	0	1878.73	0	2317.4	1511.46	2156.96	1379.21	0	0	1126.6	979.812	262.841	0	0	0	0	1062.64	0	0	869.69	0	1381.04	1274.36	0	0	0	0	0	510.757	0
CBX5	Non-matrisome	Non-matrisome	GO:CC not extracellular matrix	F2Z5T3	F2Z5T3	F2Z5T3_PIG	0	0	0	0	1239.96	747.624	684.537	2089.49	1185.02	2064.15	1537.35	0	1240.1	0	1004.74	0	468.543	0	0	661.895	0	0	658.217	0	0	0	0	0	0	798.405	0	0	984.164	0	0	994.605	0	0	0	0	0	0	0
CC2D1A	Non-matrisome	Non-matrisome	GO:CC not extracellular matrix	A0A287AAX8	A0A287AAX8	A0A287AAX8_PIG	0	0	0	0	1511.28	1484.76	0	0	4621.5	0	0	0	0	0	875.864	0	1378.89	986.491	0	0	0	970.918	0	0	1761.92	0	0	0	0	1944.98	0	0	1000.36	0	0	1563.69	0	0	0	0	1546.31	1130.23	0
CC2D1B	Non-matrisome	Non-matrisome	GO:CC not extracellular matrix	A0A8W4FCW9	A0A8W4FCW9	A0A8W4FCW9_PIG	0	952.449	0	0	0	577.764	0	0	0	0	0	0	0	0	818.658	0	0	0	0	0	0	0	786.081	977.337	0	0	0	0	0	1553.31	0	0	0	0	1051.7	0	804.791	0	679.107	0	0	0	0
CCAR1	Non-matrisome	Non-matrisome	GO:CC not extracellular matrix	A0A286ZYY3	A0A286ZYY3	A0A286ZYY3_PIG	0	1163.92	0	2222.31	2464.16	1356.68	1595.55	3943.64	0	4988.86	3331.69	658.452	2546.54	0	865.95	0	1010.09	1077.33	1233.84	0	1701.31	0	0	1242.85	866.321	0	0	0	0	3065.37	0	0	895.459	1170.38	860.482	1396.09	0	0	0	0	0	1001.66	0
CCAR2	Non-matrisome	Non-matrisome	GO:CC not extracellular matrix	F1RMA3	F1RMA3	F1RMA3_PIG	0	3282.49	2067.41	1975.01	3810.08	1949.74	3514.14	6054.17	4891.38	7987.53	7890.02	5996.86	2615.41	0	2384.34	0	1491.72	1192.43	1677.52	3895.04	0	2123.71	2420.76	1774.47	1750.31	6688.62	3182.18	4087.15	7222.11	10076.7	3854.29	0	1589.7	2295.97	2127.31	2068.45	0	3394.1	2728.76	0	1232.03	2602.24	0
CCDC115	Non-matrisome	Non-matrisome	GO:CC not extracellular matrix	A0A4X1SE54	A0A4X1SE54	A0A4X1SE54_PIG	0	1105.28	0	0	1461.09	1020.43	0	0	0	0	2971.77	0	0	0	791.595	0	1661.52	0	435.351	0	0	0	824.335	1473.45	0	0	0	0	0	1336.32	0	0	0	0	0	923.663	0	0	960.484	0	0	1092.92	0
CCDC124	Non-matrisome	Non-matrisome	GO:CC not extracellular matrix	F1S924	F1S924	F1S924_PIG	0	4518.37	2232.91	3828.44	3410.94	3388.06	0	0	0	0	1787.9	0	2281.95	0	4309.69	7527.5	4891.36	3474.86	3203.34	0	0	0	0	1843.26	0	0	0	0	0	0	0	0	1504.97	0	0	1189.91	0	0	0	0	0	1473.4	0
CCDC126	Non-matrisome	Non-matrisome	GO:CC extracellular matrix (GO:0005576, GO:0005578 & GO:0031012) & GO:CC not extracellular matrix	A0A286ZZT8	A0A286ZZT8	A0A286ZZT8_PIG	0	0	0	0	1398.17	760.261	3340.86	0	0	2764.56	2714.11	2258.11	2988.12	0	0	0	0	595.707	0	1120.46	1412.72	0	0	0	0	4776.68	0	0	0	3129.41	0	0	804.412	0	0	0	458.976	0	0	0	0	0	0
CCDC127	Non-matrisome	Non-matrisome	gene not present in GO IDs	P0C267	P0C267	CC127_PIG	0	1106.76	1926.31	3223.36	901.61	3407.06	3725.5	7204.05	1334.51	7141.26	2314.42	3145.06	2837.33	0	1410.49	0	2473.08	1601.7	3415.02	2222.52	5817.52	3510.33	2982.35	2610.44	4109.65	5027.9	0	9716.56	8853.07	1824.53	10056	3606.47	3747.78	3442.98	3787.32	3319.43	2775.37	8161.85	7132.24	8041.36	8757.5	5856.79	12589.4
CCDC134	Non-matrisome	Non-matrisome	GO:CC extracellular matrix (GO:0005576, GO:0005578 & GO:0031012) & GO:CC not extracellular matrix	A0A287A6Q1	A0A287A6Q1	A0A287A6Q1_PIG	0	0	0	1948.54	2374.76	579.197	1103.84	0	2347.24	0	0	3380.91	4011.9	0	1849.5	0	1334.5	0	0	0	2313.44	1172.58	856.539	0	1245.82	0	0	0	0	2838.06	0	0	1002.27	0	1270.08	829.734	0	0	1347.27	0	0	841.38	0
CCDC141	Non-matrisome	Non-matrisome	GO:CC not extracellular matrix	F1RZC6	F1RZC6	F1RZC6_PIG	0	0	0	0	0	0	1185.33	0	0	0	0	0	0	0	0	0	0	0	0	0	0	0	424.638	0	0	0	0	0	0	0	0	0	770.383	482.875	0	0	382.925	0	0	0	0	0	0
CCDC22	Non-matrisome	Non-matrisome	GO:CC not extracellular matrix	A0A5G2RD19	A0A5G2RD19	A0A5G2RD19_PIG	0	7359.33	5498.88	5966.43	13149.8	6774.38	13001.6	17883.7	14193.6	16208.7	17647.9	23206.7	14872.8	0	6066.39	66855.5	5330.42	5241.65	5696.75	7497.11	7464.47	5424.97	5884.76	7478.11	6122.93	30839.2	15372.1	20748.9	17292.3	17059.9	14160.9	6098.41	4591.74	5898.9	6916.94	6383.03	4214.49	5617.75	4595.95	0	4671.32	7180.19	6217.86
CCDC43	Non-matrisome	Non-matrisome	GO:CC not extracellular matrix	F1RQZ4	F1RQZ4	F1RQZ4_PIG	0	996.016	2107.32	1737.25	422.07	2069.61	0	0	0	0	0	0	0	0	2027.85	0	1798.22	1480.85	1845.11	1122.71	0	2367.13	2375.38	1673.18	3443.61	0	0	0	0	0	0	0	1202.26	1196.6	2195.6	1726.61	1266.65	0	1488.89	0	0	1192.94	0
CCDC47	Non-matrisome	Non-matrisome	GO:CC not extracellular matrix	I3LAE8	I3LAE8	I3LAE8_PIG	0	3830.33	2039.65	2777.72	2150.39	1810.43	1555.66	4204.67	1921.28	4258.77	5066.1	4086.89	2652.9	0	2966.05	0	1716.39	1871.1	0	5105.77	1775.39	3811.11	4316.46	3787.99	2732.21	0	3651.97	0	0	6011.35	0	3323.47	3898.47	2781.04	3524.74	3544.47	5023.74	0	1857.59	0	0	1692.13	1866.88
CCDC51	Non-matrisome	Non-matrisome	GO:CC not extracellular matrix	F1SKM5	F1SKM5	F1SKM5_PIG	0	2054.2	0	0	0	0	0	0	0	0	0	0	0	0	1398.5	0	3656	2097.04	1401.8	1956.63	0	1722.78	1607.63	0	1384.19	0	0	0	0	765.939	0	2828.54	0	847.754	1866.1	2238.04	0	0	0	0	0	989.26	0
CCDC6	Non-matrisome	Non-matrisome	GO:CC not extracellular matrix	F1RG04	F1RG04	F1RG04_PIG	0	1307.54	0	1161.45	747.252	0	0	0	0	0	0	0	2011.46	0	1534.91	0	1012.81	0	0	0	0	0	0	0	0	0	0	0	0	1183.04	0	0	0	738.086	1457.47	900.638	0	0	0	0	0	0	0
CCDC80	Non-matrisome	Non-matrisome	GO:CC extracellular matrix (GO:0005576, GO:0005578 & GO:0031012) & GO:CC not extracellular matrix	A0A287A732	A0A287A732	A0A287A732_PIG	0	6331	3090.13	4004.45	16105.6	4410.63	28035.7	15847.3	24716.3	38317.8	30575.2	57768.9	26785.3	0	957.1	0	3266.93	1060.6	2194.94	2694.96	0	943.936	1780.99	1284.81	1538.73	12560.3	6403.08	11273.9	6191.56	12832.7	1847.69	0	0	0	0	1076.67	0	0	986.118	0	0	818.397	0
CCDC90B	Non-matrisome	Non-matrisome	GO:CC not extracellular matrix	F1STU7	F1STU7	F1STU7_PIG	0	0	0	1308.75	378.724	0	3086.64	0	1466.76	4367.4	0	5120.07	2196.92	0	536.368	0	507.969	0	0	958.069	2562.06	1064.48	0	0	1385.07	5817.88	0	3209.49	2913.09	3230.23	1827.31	0	1184.97	765.462	875.065	565.99	558.728	0	730.018	0	674.923	0	0
CCDC93	Non-matrisome	Non-matrisome	GO:CC not extracellular matrix	A0A287ATN9	A0A287ATN9	A0A287ATN9_PIG	0	2233.41	1991.32	0	2581.35	0	0	1781.28	0	2940.47	3774.18	0	2421.1	0	1587.81	0	1130.53	0	1231.39	0	0	0	1617.54	1257.79	1876.45	0	0	0	0	2559.72	0	0	0	0	0	1381.09	0	0	0	0	0	0	0
CCPG1	Non-matrisome	Non-matrisome	GO:CC not extracellular matrix	A0A287ABM8	A0A287ABM8	A0A287ABM8_PIG	0	654.702	0	0	0	0	0	0	0	0	0	0	1724.98	0	200.108	0	0	0	0	0	1986.13	1368.11	1079.46	0	1070.93	0	0	0	0	637.382	0	1498.52	834.653	1188.79	793.202	1082.24	2233.14	0	0	0	0	0	0
CCS	Non-matrisome	Non-matrisome	GO:CC not extracellular matrix	Q6PWT7	A0A286ZIZ7;Q6PWT7	CCS_PIG	0	1461.02	0	0	0	0	0	0	0	1380.81	0	0	1683.96	0	726.117	0	1024.03	949.468	1117.3	0	0	1111.06	1706.5	1311.42	2030.93	0	0	0	0	0	0	0	0	1401.23	1193.52	1085.38	0	0	0	0	0	0	0
CCT2	Non-matrisome	Non-matrisome	GO:CC extracellular matrix (GO:0005576, GO:0005578 & GO:0031012) & GO:CC not extracellular matrix	D0G0C8	D0G0C8	D0G0C8_PIG	0	44165.1	29752.6	35714.9	35493.6	34583	30205	33565.5	28557.4	56443.2	36975.5	39762.7	29755.4	0	35498.3	18607.1	30968.4	26393.3	28982.4	31695	25884.8	27554.1	38547	37979.6	30270.8	40253.2	19229.4	25577.7	25648.7	51305.1	17678.9	23259.4	30673.4	27174.2	33456.7	34770.1	26479.7	23573.1	27664.9	21579.2	19841.5	27468.3	19571.9
CCT3^	Non-matrisome	Non-matrisome	GO:CC extracellular matrix (GO:0005576, GO:0005578 & GO:0031012) & GO:CC not extracellular matrix	Q29068	Q29068	TCPG_PIG	0	1304.5	0	0	0	0	0	0	0	0	0	0	0	0	2562.15	0	2477.35	0	0	0	0	0	0	1381.8	0	0	0	0	0	2104.91	0	0	1307.09	1318.68	0	1273.17	0	0	0	0	0	0	0
CCT3°	Non-matrisome	Non-matrisome	GO:CC extracellular matrix (GO:0005576, GO:0005578 & GO:0031012) & GO:CC not extracellular matrix	A0A5G2Q9C7	A0A5G2Q9C7	A0A5G2Q9C7_PIG	0	14832.8	13071.6	14360.9	16969.9	12958.2	15314.8	14171.6	13828.1	19220.8	17081.5	17398.3	12321	3007920	11842.4	22071.9	12109.4	11780.3	10730.8	12815.4	11323.7	10841.8	12905.9	10544.7	8570.63	14970.8	13515.9	12839.4	11613.8	46487.3	16284.7	9322.4	13293.9	12109.3	10940.4	12909.5	10659.1	10417.6	13243.5	11863.8	13397.9	13249	10027.7
CCT4	Non-matrisome	Non-matrisome	GO:CC extracellular matrix (GO:0005576, GO:0005578 & GO:0031012) & GO:CC not extracellular matrix	A0A4X1WBL9	A0A4X1WBL9	A0A4X1WBL9_PIG	0	21505.5	14041.2	14742.4	16929.4	14966.5	15216.8	16535.9	13988.6	26250.2	23665.1	14201.3	14518	0	10745.3	18017.7	14354.6	10522.1	11397.5	15801.1	11119.8	11001.2	13837.5	11223.2	10826.1	21428.4	12359.5	13180.1	15432.2	27413.7	11390.2	10536.5	11128.3	10791	11002	12486.1	9625.95	11087.8	10328.4	10199.8	13035.1	12809.6	10210
CCT5	Non-matrisome	Non-matrisome	GO:CC extracellular matrix (GO:0005576, GO:0005578 & GO:0031012) & GO:CC not extracellular matrix	A0A8D1QR27	A0A8D1QR27	A0A8D1QR27_PIG	0	19778.5	16180.7	16611.5	14732	14098.6	16384.7	18028.5	12550.4	31001	15337.4	20857.2	12098	0	14969.9	25223.2	13522.7	12528.1	15232.9	13793.3	8638.77	7562.6	9743.83	11312.3	10527.7	28581.4	11877.6	11404.6	8387.36	19936.7	8737.61	8976.12	13890.6	12732.1	10402.5	12427.8	9720.94	9352.21	12332.9	7551.64	9222.79	11805.2	9676.1
CCT6A	Non-matrisome	Non-matrisome	GO:CC not extracellular matrix	I3L9J4	I3L9J4	I3L9J4_PIG	0	26111.6	17377.3	22796.2	23373.6	22656.9	26718.9	31179.3	22550.4	34631	35743.5	29499.5	24665.5	0	21120.4	24636.5	19634.7	16570.4	15271.3	20828.1	22107.7	21577.5	27454.8	20335.7	17512.7	32519.7	17628.3	24049.5	26167.1	40390.4	23684.4	17547.6	20213.3	21307.4	20412	21037.1	24459.1	13951.1	17394.4	11061.7	13429.9	21287.5	15792.1
CCT7	Non-matrisome	Non-matrisome	GO:CC extracellular matrix (GO:0005576, GO:0005578 & GO:0031012) & GO:CC not extracellular matrix	A0A4X1W928	A0A4X1W928	A0A4X1W928_PIG	0	9643.13	9162.95	8828.97	9880.78	9173.41	10883.9	11218.4	8991.61	15979.6	14668.7	10652	9875.96	0	9791.9	10683.5	9228.33	7857.66	7229.96	6404.64	9391.25	5038.55	6916.3	5479.41	5431.14	9941.49	9359.66	8609.15	10119.7	17470.6	7839.25	5588.51	7667.94	7178.1	5493.28	7361.44	6081.05	6772.52	6079.29	5358.96	6644.52	7170.61	5320
CCT8	Non-matrisome	Non-matrisome	GO:CC extracellular matrix (GO:0005576, GO:0005578 & GO:0031012) & GO:CC not extracellular matrix	I3LCA2	I3LCA2	I3LCA2_PIG	0	18531.6	15819.2	17542.1	18323.1	14173.4	16934.8	17283.2	15368.5	31048.9	23392.7	15405.8	15178	2413150	12965.8	12976.5	17183.8	11805.6	12714.2	12509.7	9933.71	9643.98	12688.9	11437.2	12561.2	15930.1	14162.9	16204	14158.1	33316.2	15051.8	9467.64	14686.3	13037.9	12948.3	14677.6	10729	12317.3	11609.2	10626.4	9393.21	11881.2	9819.94
CCZ1	Non-matrisome	Non-matrisome	GO:CC not extracellular matrix	I3L7N6	I3L7N6	I3L7N6_PIG	0	0	0	962.907	0	861.514	0	0	0	0	0	0	0	0	702.731	0	0	1149.17	0	0	0	0	0	0	0	0	0	0	0	0	0	0	0	1315.81	0	1285.67	473.455	0	0	0	0	0	0
CD109	Matrisome-associated	ECM Regulators	GO:CC extracellular matrix (GO:0005576, GO:0005578 & GO:0031012) & GO:CC not extracellular matrix	K7GKY0	K7GKY0	K7GKY0_PIG	0	7688.69	4113.94	5991.08	13251.4	4540.7	16725.6	12819.1	10688.4	18973.7	16125.8	29479.5	14387.9	0	4395.64	37808.4	5905.48	2842.72	4854.4	9952.18	6641.16	1208.11	842.594	3201.66	1568.21	26044.8	23113.4	27604	8436.42	10205.3	15271.7	0	1676.71	4339.64	3372.26	3082.68	3077.87	0	1853.3	2978.62	1411.95	0	0
CD14	Non-matrisome	Non-matrisome	GO:CC extracellular matrix (GO:0005576, GO:0005578 & GO:0031012) & GO:CC not extracellular matrix	A2SW51	A2SW51	A2SW51_PIG	0	2100.7	0	1519.21	3255.04	2784.03	0	5745.12	0	5378.77	6067.11	0	0	0	2181.35	0	3554.91	1166.34	2650.14	0	0	0	0	0	0	0	0	0	0	2976.16	0	0	0	0	0	1584.76	0	0	0	0	0	0	0
CD151	Non-matrisome	Non-matrisome	GO:CC not extracellular matrix	F1RYZ1	F1RYZ1	F1RYZ1_PIG	0	7194.53	8866.58	9751.1	8144.79	7750.09	10343.1	8816.61	13201.8	13343.3	16737.9	11210.8	14602.9	0	4998.63	0	5849.77	6684.62	8962.33	6050.89	0	0	0	1511.06	1130.34	0	20036	5715.98	0	3281.33	0	5367.19	5638.78	10245.7	0	5983.27	1378.36	19724.6	19311.6	18045.6	16587.4	14137.7	9291.45
CD163°	Non-matrisome	Non-matrisome	GO:CC extracellular matrix (GO:0005576, GO:0005578 & GO:0031012) & GO:CC not extracellular matrix	Q2VL90	A0A287B9P2;Q2VL90	C163A_PIG	0	1019.34	0	0	1826.25	0	3279.45	2000	0	2356.74	0	0	4788.77	0	857.105	0	811.501	0	1351.58	0	0	0	0	0	0	0	0	3740.91	0	4475.75	2964.92	0	0	0	0	1241.18	0	0	0	0	0	0	0
CD180	Non-matrisome	Non-matrisome	GO:CC extracellular matrix (GO:0005576, GO:0005578 & GO:0031012) & GO:CC not extracellular matrix	Q7YRL4	Q7YRL4	Q7YRL4_PIG	0	0	0	0	0	0	0	0	0	2168.31	0	0	1165.99	0	0	0	0	0	0	0	0	0	0	0	0	1585.99	0	0	0	2615.12	2504.81	0	0	0	0	0	0	0	0	0	0	0	0
CD200	Non-matrisome	Non-matrisome	GO:CC not extracellular matrix	A0A8W4FDL5	A0A8W4FDL5	A0A8W4FDL5_PIG	0	0	0	0	1702.23	0	0	0	3055.06	0	4976.78	0	2706.06	0	656.357	0	0	0	0	0	0	0	0	0	0	0	0	0	0	2429.97	0	0	0	0	0	0	0	0	2100.67	0	0	0	0
CD276	Non-matrisome	Non-matrisome	GO:CC not extracellular matrix	A0A287AY78	A0A287AY78	A0A287AY78_PIG	0	1882.06	1747.43	1088.94	3686.51	1020.64	5674.39	5457.76	6594.76	6182.61	4886.39	0	4676.36	0	717.538	0	2148.29	0	1323.91	2092.95	0	0	549.78	0	0	0	7413.89	6853.8	0	2915.52	6650.17	0	0	1289.31	1107.67	0	1616.21	2509.78	1470.26	3179.85	2057.69	1082.69	0
CD2AP	Non-matrisome	Non-matrisome	GO:CC not extracellular matrix	M3VH74	M3VH74	M3VH74_PIG	0	1595.2	0	0	2401.9	1188.22	0	4233.57	4674.63	4338.91	4432.3	0	2482.21	0	1316.72	0	1635.86	0	0	0	0	0	0	0	0	0	0	0	0	0	0	0	0	0	0	834.107	0	0	0	0	0	0	0
CD2BP2	Non-matrisome	Non-matrisome	GO:CC not extracellular matrix	A0A480SNH9	A0A480SNH9	A0A480SNH9_PIG	0	4745.35	9347.38	5280.23	7908.57	3841.58	12790.2	8520	11176.7	10048.5	11537.1	15632.4	12882.5	0	2772.46	41659	5660.21	4085.8	3090.61	3181	10648.5	4478.31	3640.82	4398.7	3421.06	0	0	0	0	3969.08	0	2013.99	3582.02	4811.19	8149.49	4585.04	5008.44	0	1545.5	0	0	1353.96	1985.57
CD300LG	Non-matrisome	Non-matrisome	GO:CC not extracellular matrix	A0A5G2QZP2	A0A5G2QZP2	A0A5G2QZP2_PIG	0	0	0	0	0	0	0	0	0	0	0	0	0	0	214.401	0	0	0	1963.97	0	0	0	0	0	0	0	0	0	0	0	0	0	0	0	0	0	0	7529.47	6385.08	0	0	3629.08	0
CD36	Non-matrisome	Non-matrisome	GO:CC not extracellular matrix	Q3HUX1	Q3HUX1	Q3HUX1_PIG	0	55325.2	64716.7	85258.1	41341.2	71925.5	54963.6	20430.3	27368.4	19686.9	34660.4	38663.5	81426.5	0	15655.9	18948.8	84084.6	100663	63839.5	58947.7	90786	31549.5	29197.1	40937.1	43634.1	16417.5	77139.6	23938.9	20773.9	26946.6	34852.7	66662.1	68011	91795.5	40900.9	46146.8	43842.9	384741	238748	256816	308980	136500	135441
CD44	Non-matrisome	Non-matrisome	GO:CC not extracellular matrix	F1SGT4	F1SGT4	F1SGT4_PIG	0	3431.88	2002.6	2291.92	6416.13	2665.88	8077.33	14226	13364.8	13508.5	18683.8	10685.2	15680.7	0	1625.39	0	2693.79	1541.68	1290.06	5310.03	2955.44	0	1879.67	0	1573.18	21174.8	17920	12911.1	16610.5	10820.5	11969.5	2272.82	0	1371.65	3354.9	1806.82	0	1749.09	1784.23	0	0	1969.14	0
CD47	Non-matrisome	Non-matrisome	GO:CC not extracellular matrix	Q9GKE8	A0A5G2R5L9;Q9GKE8	CD47_PIG	0	9174.2	8630.96	7194.29	9623.69	6585.54	18773.8	16006	22506.4	26010.4	24752	0	18591.1	0	5077.39	0	5465.28	3865.71	3702.5	7378.29	4117.09	0	0	0	0	0	42133.8	17502.5	0	12927.5	9270.75	3633.08	3268.63	4810.81	0	4386.15	0	33041.8	28027.9	48215.6	29216.9	22403.3	19597.6
CD55	Non-matrisome	Non-matrisome	GO:CC extracellular matrix (GO:0005576, GO:0005578 & GO:0031012) & GO:CC not extracellular matrix	A0A287B6Q2	A0A287B6Q2	A0A287B6Q2_PIG	0	0	2387.67	0	4742.3	981.426	4389.3	34828.7	12830.5	17077.6	46542.8	7824.88	14880.1	0	816.403	0	1040.55	0	0	4712.98	4002.32	0	0	0	0	5649.9	92582.3	10197	0	12638.9	9276.83	0	0	1486.83	0	1610.48	0	0	1732.5	5090.44	4155.93	1227.75	0
CD58	Non-matrisome	Non-matrisome	GO:CC not extracellular matrix	F1SAX5	F1SAX5	F1SAX5_PIG	0	1917.83	1036.66	542.146	2587.65	1056.68	3887.88	2678.64	1026.26	2134.34	5959.85	0	4031.91	0	817.099	0	1720.64	0	808.491	4859.47	4349.07	993.415	1040.34	939.092	1017.38	6821.66	4316.2	8398.95	12551.9	7730.28	13144.3	1267.31	688.623	1755.44	1999.4	966.051	770.44	2117.17	864.385	0	1779.53	695.744	0
CD63	Non-matrisome	Non-matrisome	GO:CC not extracellular matrix	F1SPK8	F1SPK8	F1SPK8_PIG	0	851.925	0	1322.69	3844.62	996.112	2965.87	2610.49	6717.92	6852.23	4101.94	2550.01	7021.69	0	872.169	0	1696.97	1661.02	0	0	0	0	0	0	0	0	4970.37	4864.59	0	1424.51	0	0	0	1199.8	0	1164.76	0	0	0	0	2325.42	1143.08	0
CD68	Non-matrisome	Non-matrisome	GO:CC not extracellular matrix	F1ST28	F1ST28	F1ST28_PIG	0	14550.5	15237.5	12465.3	40750.5	18136.5	48028.8	48225.6	43075.5	51512.4	59921.3	72761.3	91868.6	0	7133.27	0	23443.3	11412.2	8836.16	38091.5	30969.5	4294.27	7949.09	6753.3	5083.27	232404	70761.7	123125	58642.1	32482.5	60918.5	13554.8	7515.16	8454.32	16334.4	14186.8	14928.2	40577.1	13170.3	36069	29019.5	18694.9	21246.7
CD74	Non-matrisome	Non-matrisome	GO:CC not extracellular matrix	A0A287B7S0	A0A287B7S0	A0A287B7S0_PIG	0	5069.02	4381.28	4545.83	7612.64	4970.13	13721.9	8934.21	15007.2	12171.5	9748.26	11290.7	16393.5	0	2691.42	0	4055.3	4580.32	3283.44	10554.6	9691.96	3053.7	2433.47	5227.23	2847.47	21561.2	7271.33	8248.6	9660.08	18264.2	13517.5	2868.71	3433.37	3166.11	4160.09	3141.5	9241.78	4037.01	3059.95	0	4382.9	4798.22	0
CD81	Non-matrisome	Non-matrisome	GO:CC not extracellular matrix	A0A286ZTI5	A0A286ZTI5	A0A286ZTI5_PIG	0	4128.09	0	2996.33	5972.96	2106.8	6579.5	14700.5	8973.69	8709.55	14915.5	0	7821.79	0	2209.86	0	1609.59	0	1530.97	0	0	0	0	0	0	0	16552.8	3814.39	0	1761.14	0	0	0	2991.08	0	1937.73	0	2093.88	1400.17	0	2856.83	2119.83	0
CD82	Non-matrisome	Non-matrisome	GO:CC not extracellular matrix	B7ZEQ3	B7ZEQ3	B7ZEQ3_PIG	0	1542.82	0	1075.5	1711.74	868.574	1397.14	0	3313.07	1283.99	0	0	0	0	1051.49	0	897.349	0	0	0	0	0	0	0	0	0	0	3450.32	0	1114.01	0	0	428.276	1020.89	0	507.393	0	854.648	1954.31	0	1875.95	1031.4	0
CD93	Non-matrisome	Non-matrisome	GO:CC not extracellular matrix	F1SAT8	F1SAT8	F1SAT8_PIG	0	0	0	0	0	1600.51	0	0	0	0	0	0	0	0	1374.53	0	812.864	1805.38	1568.17	0	0	0	0	0	0	0	0	0	0	0	0	0	0	0	0	622.241	0	1573.23	1880.2	0	1933.67	1643.27	0
CDAN1	Non-matrisome	Non-matrisome	GO:CC not extracellular matrix	F1SI43	F1SI43	F1SI43_PIG	0	0	0	0	0	0	0	3900.29	0	739.166	1484.84	0	0	0	0	0	0	0	0	0	0	0	0	0	0	0	0	2831.39	0	0	0	0	0	0	0	0	752.839	0	0	0	0	0	0
CDC123	Non-matrisome	Non-matrisome	GO:CC not extracellular matrix	F1RUP8	F1RUP8	F1RUP8_PIG	0	5175.74	6372.88	6310.67	3441.88	4496.1	5886.75	3338.88	3187.95	2339.41	3711.92	5315.13	3459.63	0	3744.7	0	5082.17	4883.06	5074.06	5639.87	11418.8	9651.4	7301.23	4351.01	10393.8	11537.1	10646.9	14316.1	6730.25	4104.55	8050.21	9572.19	8069.23	8149.27	8627.38	4860.51	13889.2	7964.16	5206.49	8302.42	6253.97	3776.89	9101.97
CDC27	Non-matrisome	Non-matrisome	GO:CC not extracellular matrix	A0A4X1TAL1	A0A4X1TAL1	A0A4X1TAL1_PIG	0	0	0	0	0	0	0	0	0	0	0	0	0	0	0	0	0	0	0	0	0	0	859.009	0	797.151	0	0	3329.88	4216.58	1852.82	3279	0	0	771.093	1373.95	0	1299.25	0	0	0	0	0	0
CDC34	Non-matrisome	Non-matrisome	GO:CC not extracellular matrix	A0A287BPQ6	A0A287BPQ6;A0A4X1USQ6	A0A287BPQ6_PIG	0	0	0	0	0	0	0	0	0	0	0	0	0	0	0	0	0	0	1571.19	0	0	2610.52	2874.94	2729.66	2820.59	0	0	0	0	2741.59	0	0	2617.42	2988.32	3737.24	1992.64	3214.31	0	0	0	0	0	0
CDC37	Non-matrisome	Non-matrisome	GO:CC not extracellular matrix	Q684M6	Q684M6	Q684M6_PIG	0	8690.76	8967.49	8752.72	9911.33	8953.9	8183.83	8199.31	9084.32	10501.2	8715.61	9004.01	9352.4	0	8705.52	28949	11303.8	9125.83	9256.2	3312.75	0	1925.34	2416.96	4664.8	2834.76	0	0	0	0	3610.01	0	0	3009.69	4579.32	2777.47	5310.93	0	5461.56	5614.51	0	0	5599.87	7945.72
CDC40	Non-matrisome	Non-matrisome	GO:CC not extracellular matrix	F1RSY9	F1RSY9	F1RSY9_PIG	0	2932.08	0	0	4629.93	0	6860.59	0	5433.18	7297.87	7476.36	11305.5	7159.29	0	0	0	3561.05	0	0	2848.47	0	1529.16	0	1739.94	0	0	0	0	0	2374.61	0	0	2199.5	0	1547.41	0	0	2435.46	0	0	0	1478.82	0
CDC42	Non-matrisome	Non-matrisome	GO:CC not extracellular matrix	Q007T2	A0A5S6GXN2;Q007T2	CDC42_PIG	0	64320.1	44530.3	57515.2	69135.9	47495.4	98000.7	98224.1	108047	164504	111897	173310	79899.9	0	18474.9	46707	36123.5	51701.1	59188.2	40832.7	41241.3	20378.9	27350.7	32327.4	26335.1	122813	66329.1	55443.6	44190.2	61392	30937	46565.1	30328.4	35119.9	31887.2	46739.5	28691.9	135405	148722	140190	106638	81018	121340
CDC42BPA	Non-matrisome	Non-matrisome	GO:CC not extracellular matrix	A0A286ZYD7	A0A286ZYD7	A0A286ZYD7_PIG	0	0	0	719.384	951.132	0	0	2217.04	1547.01	1157.04	2878.18	4035.78	1732.64	0	0	0	817.964	0	0	832.878	1042.69	0	278.277	0	326.937	2069.51	0	4256.49	0	802.392	1275.21	0	620.353	553.221	0	0	0	0	0	0	0	560.51	0
CDC42BPB	Non-matrisome	Non-matrisome	GO:CC not extracellular matrix	A0A480JSC9	A0A480JSC9	A0A480JSC9_PIG	0	1186.22	824.505	754.434	2332.74	898.212	3554.06	4973.52	3263.07	2775.27	5403.9	4949.25	5765	0	555.111	0	775.339	915.958	0	2197.62	1932.5	1866.67	1603.18	956.847	1179.94	4012.56	0	3736.32	2902.53	3637.27	5706.56	0	1433.91	1110.95	1142.84	1634.32	1968.24	0	1111.94	0	2529.47	0	0
CDC42EP4	Non-matrisome	Non-matrisome	GO:CC not extracellular matrix	F1RV35	F1RV35	F1RV35_PIG	0	2374.73	1551.87	0	0	0	0	0	0	0	0	0	0	0	2571.81	0	0	1008.22	1864.51	3114.81	0	1659.04	0	1330.09	1330.22	0	0	0	0	1853.73	0	0	0	0	1235.87	1174.41	0	0	1412.54	0	0	1808.52	0
CDC5L	Non-matrisome	Non-matrisome	GO:CC not extracellular matrix	A0A8W4FLS6	A0A8W4FLS6	A0A8W4FLS6_PIG	0	2282.4	2234.55	0	2076.98	0	0	6484.13	0	4664.39	6977.39	0	4109.03	0	1221.97	0	0	0	0	0	3442.14	1625.98	0	0	0	0	0	0	3709.28	4769.4	0	0	0	1457.87	0	2380.44	0	0	0	0	0	0	0
CDC73	Non-matrisome	Non-matrisome	GO:CC not extracellular matrix	F1SAB0	F1SAB0	F1SAB0_PIG	0	0	0	0	1294.45	478.021	2002.83	3615.08	1794.75	3154.2	2877.34	3527.72	3197.16	0	617.027	0	0	413.523	0	1795.65	3603.39	1987.94	1267.33	1437.42	1790.8	6052.58	0	0	0	3313.63	2668.54	1032.29	0	1558.39	2051.84	1088.64	1502.47	1335.83	728.572	0	0	1534.42	0
CDH1	Non-matrisome	Non-matrisome	GO:CC extracellular matrix (GO:0005576, GO:0005578 & GO:0031012) & GO:CC not extracellular matrix	A0A287BPL8	A0A287BPL8	A0A287BPL8_PIG	0	0	0	0	996.518	1977.53	0	6786.72	0	0	0	0	0	0	490.268	0	1434.07	955.031	0	0	0	0	0	0	1105.59	0	0	0	0	0	0	0	0	0	0	612.007	0	0	0	0	0	0	0
CDH11	Non-matrisome	Non-matrisome	GO:CC not extracellular matrix	F1RFU7	F1RFU7	F1RFU7_PIG	0	1680.06	0	0	2240.69	1398.25	2316.52	5197.21	8168.13	4147.61	3164.91	4966.88	2714.89	0	736.709	0	1113.68	0	0	0	0	0	1156.79	1012.57	1027.83	9450.16	4898.53	4678.54	0	4268.05	0	0	0	0	1380.3	1019.37	855.72	0	0	0	0	0	0
CDH13	Non-matrisome	Non-matrisome	GO:CC extracellular matrix (GO:0005576, GO:0005578 & GO:0031012) & GO:CC not extracellular matrix	A0A8D0USM9	A0A8D0USM9	A0A8D0USM9_PIG	0	15301.4	13408.2	13504.6	16015.7	11287.9	13530.2	9163.92	16656.8	16301.9	13559.9	13367.3	17010.6	2666520	15505.4	19060	12605.3	10617.8	11052.8	11336.3	12475.2	2803.05	3977.64	8155.4	3862.76	14472	12416.2	15148.1	13655.6	16400.3	14858.5	3240.23	4954.79	4848.04	5645.06	7329.72	3848.34	6630.47	14514.2	0	4650.04	4256.12	3903.54
CDH15	Non-matrisome	Non-matrisome	GO:CC not extracellular matrix	A0A287AKU3	A0A287AKU3	A0A287AKU3_PIG	0	1628.2	0	1218.88	762.782	0	0	0	0	0	0	0	0	0	1064.32	0	925.279	0	0	2244.05	0	2139.56	2540.4	2285.83	2394.73	0	0	0	0	0	0	0	1378.67	1909.15	2265.2	1305.65	1606.19	0	1184.16	0	0	0	0
CDH5	Non-matrisome	Non-matrisome	GO:CC not extracellular matrix	O02840	Q8WNW5;O02840	CADH5_PIG	0	3714.72	4862.66	4865.68	3969.24	3712.52	3002.86	3733.09	5702.57	3616.12	4641.51	0	5457.99	0	3862.14	5272.61	3739.8	3276.57	3324.42	4721.32	7457.98	3432.8	4367.71	6301.81	5010.3	0	0	0	0	3031.01	0	2671.84	2756.83	3417.45	5425.8	3477.8	4372.69	0	0	0	0	0	0
CDIPT	Non-matrisome	Non-matrisome	GO:CC not extracellular matrix	D0G6R6	D0G6R6	D0G6R6_PIG	0	2504.08	0	2086.62	3659.32	0	3705.16	2820.11	5122.01	3374.58	8537.14	6235.57	2779.97	0	2143.05	0	394.857	0	1252.83	2201.67	2898.52	0	0	0	0	2945.93	6471.49	1373.96	0	842.108	3621.91	1705.79	2368.87	1980.1	1085.98	2235.35	0	4689.18	2953.35	6909.88	8741.92	1427.3	3978.79
CDK13	Non-matrisome	Non-matrisome	GO:CC extracellular matrix (GO:0005576, GO:0005578 & GO:0031012) & GO:CC not extracellular matrix	F1SSC2	A0A287BFF3;F1SSC2	F1SSC2_PIG	0	860.742	1117.67	0	972.876	0	0	1144.16	1304.21	1573.62	0	0	863.121	0	0	0	0	0	0	0	0	0	0	0	0	0	0	0	0	1021.44	0	0	0	0	0	0	0	0	0	0	0	0	0
CDK16	Non-matrisome	Non-matrisome	GO:CC not extracellular matrix	K7GRV3	K7GRV3;A0A5G2RNH1	K7GRV3_PIG	0	1152.22	2077.87	1075.47	1975.73	1325.17	5643.7	4701.13	2928.29	8855.93	8300.15	17202.8	3521.72	0	685.629	0	1376.41	575.422	936.07	3044.5	5639.49	3617.95	3819.62	2580.37	3562.12	30746.2	12461.5	25081.3	19188.6	6297.42	22311	2634.27	2656.14	1842.72	4996.17	1537.3	3277.14	2465.71	1469.67	0	2897.56	1677.43	3812.6
CDK2	Non-matrisome	Non-matrisome	GO:CC not extracellular matrix	F1SPH6	F1SPH6	F1SPH6_PIG	0	2288.78	2375.48	3031.7	3221.81	0	6266.8	0	3105.58	0	3177.17	3909.84	0	0	1129.65	0	1725.22	1945.83	1390.73	4012.04	4548.75	3257.58	1892.28	2509.41	3486.39	7240.07	0	9241.48	0	3614.53	0	3352.05	3459.45	2211.61	3237.66	2690.39	3801.9	2567.93	0	0	2149.29	2357.58	0
CDK5	Non-matrisome	Non-matrisome	GO:CC not extracellular matrix	Q197W4	Q197W4	Q197W4_PIG	0	0	0	1088.34	0	2117.86	1804.27	0	0	1515.88	0	0	2046.59	0	1380.4	0	695.418	1101.64	0	0	0	1720	0	955.704	2210.79	0	0	4856.97	0	2480.86	0	0	1922.82	3807.13	0	2629.71	3647.54	0	1367.28	0	0	2157.71	0
CDK5RAP3	Non-matrisome	Non-matrisome	GO:CC not extracellular matrix	F1RWH6	F1RWH6	F1RWH6_PIG	0	5802.99	6079.29	6647.61	6782.07	5484.83	10547.9	6981.59	7496.16	7904.13	8611.99	12353.2	8670.98	0	3210.76	0	4879.66	3862.48	4665.68	6389.62	13319.6	7442.07	8394.48	8391.74	9913.88	29784.5	6272.29	14781.9	9233.75	25784	9340.93	5514.11	6312.08	4550.34	10365.4	7040.2	6299.09	7907.39	5863.69	0	6135.92	5251.57	6004.17
CDKN1B	Non-matrisome	Non-matrisome	GO:CC not extracellular matrix	Q9BDC3	Q9BDC3	Q9BDC3_PIG	0	1305.24	1861.13	0	0	1434.32	0	0	0	0	0	0	0	0	660.377	0	0	0	0	0	0	0	0	0	0	0	0	0	0	0	0	0	0	0	0	0	0	0	0	0	0	0	0
CDS2	Non-matrisome	Non-matrisome	GO:CC not extracellular matrix	A0A480TLQ8	A0A480TLQ8	A0A480TLQ8_PIG	0	0	0	0	0	0	0	0	0	0	0	0	0	0	0	0	0	0	0	0	0	0	2805.4	0	0	0	0	0	0	0	0	0	0	0	0	0	0	0	0	0	0	0	0
CDV3	Non-matrisome	Non-matrisome	GO:CC not extracellular matrix	I3LUE6	I3LUE6	I3LUE6_PIG	0	610.428	0	0	713.253	504.419	0	0	0	0	0	0	0	0	723.557	0	1268.22	729.945	1022.92	0	0	0	0	0	0	0	0	0	0	0	0	0	0	0	0	0	0	0	0	0	0	0	0
CEACAM1	Non-matrisome	Non-matrisome	GO:CC not extracellular matrix	I3L9E5	I3L9E5	I3L9E5_PIG	0	0	0	0	0	0	0	0	0	0	0	0	0	0	0	0	0	0	0	1733.22	2186.16	0	0	638.311	0	2653.29	0	0	0	937.269	2589.78	0	444.351	0	0	0	0	0	0	0	0	0	0
CEBPZOS	Non-matrisome	Non-matrisome	GO:CC not extracellular matrix	A0A286ZYD5	A0A286ZYD5	A0A286ZYD5_PIG	0	0	0	0	0	1844.76	0	0	0	0	0	0	0	0	0	0	0	1716.72	0	0	0	2069.4	1694.66	2930.47	2687.67	0	0	0	0	753.987	0	1556.83	1594.07	0	3643.32	1257.22	1730.43	0	0	0	0	1709.7	1273.93
CELF1	Non-matrisome	Non-matrisome	GO:CC not extracellular matrix	A0A287A4M6	A0A287A4M6	A0A287A4M6_PIG	0	2198.51	0	1976.91	1234.99	2581.84	0	0	0	1793.52	2302.07	2405.53	1844.01	0	1703.93	0	1532.45	2593.32	1949.57	2312.2	0	2942.49	2595.21	2847.89	2583.83	3661.17	0	0	0	2882.65	0	1222.68	1245.43	3022.28	3738.83	2220.39	2862.74	1862.2	1097.26	0	1563.13	1505.94	0
CELF2	Non-matrisome	Non-matrisome	GO:CC not extracellular matrix	A0A286ZQK4	A0A286ZQK4	A0A286ZQK4_PIG	0	0	0	0	0	1394.53	0	0	0	0	1807.56	0	0	0	990.872	0	0	0	0	0	0	955.05	693.085	762.515	0	0	0	0	0	1342.58	0	0	537.407	613.804	729.533	1368.62	931.612	0	0	0	0	0	0
CENPV	Non-matrisome	Non-matrisome	GO:CC not extracellular matrix	A0A5G2R844	A0A5G2R844	A0A5G2R844_PIG	0	1841.1	1071.54	1316.77	1615.28	1023.5	1359.21	5437.14	6087.52	3906.81	3982.54	0	3124.18	0	1403.98	0	840.514	1189.39	722.236	2851.89	2807.16	2735.68	3146.32	1803.08	2178.24	4356.1	4981.71	3571.58	4771.82	7423.59	3211	2691.21	2122.89	1538.51	3292.31	2159.72	2111.27	2226.19	1645.39	2570.96	2778.82	2334.94	2633.16
CEP170	Non-matrisome	Non-matrisome	GO:CC not extracellular matrix	A0A287AIA1	A0A287AIA1	A0A287AIA1_PIG	0	1102.59	0	0	1931.44	0	1783.45	3750.98	2481.87	4395.06	3716.75	4295.47	6198.84	0	680.59	0	1316.21	0	0	1925.38	0	872.304	678.995	0	0	0	0	0	0	996.789	0	0	0	0	0	1478.89	0	0	0	0	0	0	0
CEP192°	Non-matrisome	Non-matrisome	GO:CC not extracellular matrix	F1SMB8	F1SMB8	F1SMB8_PIG	0	0	0	0	0	0	0	0	0	0	0	0	0	0	0	0	0	803.525	0	18574.3	10008.2	6841.65	0	0	25133.2	0	0	0	0	6674.67	0	14249	0	5481.09	33930.8	5532.21	31717.8	2273.05	0	0	0	0	0
CEP192^	Non-matrisome	Non-matrisome	GO:CC not extracellular matrix	I3LR40	I3LR40	I3LR40_PIG	0	1169.66	0	595.054	1530.03	0	1897.65	0	0	2627.41	2801.46	0	1170.41	0	521.138	0	318.278	0	0	746.375	0	0	1052.56	0	1370.78	0	0	0	0	1350.19	0	0	0	0	0	0	0	0	0	0	0	0	0
CERCAM	Non-matrisome	Non-matrisome	GO:CC not extracellular matrix	F1RR83	F1RR83	F1RR83_PIG	0	0	0	0	0	0	0	0	0	0	0	0	0	0	0	0	0	0	0	0	0	0	0	0	890.476	4895	0	0	0	3384.95	0	0	0	0	2476.66	666.613	1169.17	0	0	0	0	0	0
CERS2	Non-matrisome	Non-matrisome	GO:CC not extracellular matrix	A0A287A843	A0A287A843	A0A287A843_PIG	0	0	0	1891.01	0	1330.37	5670.14	6020.15	3843.83	8310.12	9636.05	4292.99	5390.13	0	0	0	0	888.295	0	1316.21	3095.19	0	0	0	0	5314.3	4431.99	8424.77	4650.43	3789.52	2450.64	0	689.329	1777.34	0	0	629.537	0	0	0	0	0	0
CERS4	Non-matrisome	Non-matrisome	GO:CC not extracellular matrix	D0G774	D0G774	D0G774_PIG	0	0	1705.16	0	0	872.323	0	0	0	0	2949.16	0	0	0	374.147	0	0	0	0	1990.34	4116.16	1774.09	1477.07	0	1812.54	0	0	0	0	1267.27	0	0	1472.19	0	1861.81	0	2549.51	0	1138.87	0	0	1171.4	0
CERT1	Non-matrisome	Non-matrisome	GO:CC not extracellular matrix	I3LGX5	I3LGX5	I3LGX5_PIG	0	0	0	1332.24	829.091	895.429	0	0	0	0	0	0	0	0	694.873	0	0	1164.11	0	835.457	3040.07	1847.22	1855.98	1471.12	1322.92	0	0	0	0	1003	0	1747.85	1413.95	1683.21	4248.81	1327.3	2365.61	0	618.644	0	1819.02	1156.5	0
CES1	Non-matrisome	Non-matrisome	GO:CC not extracellular matrix	F1RF16	Q29550;A0A287A8N2;A0A287AGL9;F1RF16	F1RF16_PIG	0	1598.77	0	6148.84	1216.72	1998.61	3539.14	3480.52	0	6006.39	0	2827.61	2673.42	0	1099.91	0	0	1218.21	0	5250.52	4754.11	0	0	1970.11	0	3501.16	0	0	0	3961.25	0	0	0	2760.49	0	1776.5	0	0	0	0	0	0	0
CETN2	Non-matrisome	Non-matrisome	GO:CC not extracellular matrix	A0A4X1TCT6	A0A4X1TCT6	A0A4X1TCT6_PIG	0	3082.09	2548.94	1285.51	3531.79	1734.45	3866.62	2292.39	5901.02	3002.32	3124.41	3680.24	4301.64	0	1391.6	0	1924.49	1069.86	831.116	2998.08	2235.37	897.069	856.62	1865.34	966.856	5153.44	0	0	0	1898.85	0	0	1423.01	703.085	1939.85	1380.32	999.113	0	1069.56	0	0	0	0
CFAP410	Non-matrisome	Non-matrisome	GO:CC not extracellular matrix	A0A481C5X7	A0A481C5X7	A0A481C5X7_PIG	0	0	0	0	0	0	0	0	0	0	2272	3201.27	0	0	0	0	0	0	0	1266.52	1227.78	0	0	0	0	5519.27	0	4836.61	0	2068.1	0	0	0	0	0	0	0	0	0	0	0	0	0
CFB	Non-matrisome	Non-matrisome	GO:CC extracellular matrix (GO:0005576, GO:0005578 & GO:0031012) & GO:CC not extracellular matrix	A0A287AAZ9	A0A287AAZ9	A0A287AAZ9_PIG	0	19586.5	43906	37620.2	60601.9	41008.9	47858	49461.8	55357.5	58201.3	101411	96818.2	51633.3	0	32586.7	79482.7	60115.4	47936.9	32278.8	3947.4	0	2231.79	5014.46	8603.25	4701.58	0	16112.6	0	12093.5	11957.5	0	8272.25	4927.37	3604.69	0	9513.92	3997.61	11966.3	11794.4	7587.44	10176.3	15463.1	12921.2
CFD	Non-matrisome	Non-matrisome	GO:CC extracellular matrix (GO:0005576, GO:0005578 & GO:0031012) & GO:CC not extracellular matrix	P51779	P51779	CFAD_PIG	0	0	1692.25	1672.02	2452.02	1432.88	2296.71	3423.2	0	1160.47	3007.84	6412.15	2900.24	0	1222.23	0	1743.8	1067.76	1297.2	0	0	0	0	0	0	0	0	3868.34	0	0	0	0	0	0	0	621.704	0	0	0	0	0	0	0
CFH	Non-matrisome	Non-matrisome	GO:CC extracellular matrix (GO:0005576, GO:0005578 & GO:0031012) & GO:CC not extracellular matrix	A0A287BD18	A0A287BD18	A0A287BD18_PIG	0	9512.77	10366.1	7970.98	37027.8	5822.49	27126.3	45135.2	50986.6	37658.5	74233.8	35379.2	37189.4	0	5941.52	4654.86	10869.3	5803.01	4076.42	0	0	911.282	1150.77	2619.95	0	0	10881.6	0	11084.6	11984	0	3287.22	1536.61	2888.23	0	2003.98	0	0	2271.7	0	0	0	0
CFI	Non-matrisome	Non-matrisome	GO:CC extracellular matrix (GO:0005576, GO:0005578 & GO:0031012) & GO:CC not extracellular matrix	A0A287AQ20	A0A287AQ20	A0A287AQ20_PIG	0	2575.87	11410.9	6861.44	6805.54	4717.77	17347.4	10983	8508.86	12016.4	16110.8	14970.1	7481.28	0	2329.08	8953.13	5490.41	2998.11	2737.17	1471.72	4335.59	729.81	673.468	3094.33	1537.35	1487.28	0	6251.93	0	2761.57	0	0	1532.09	653.34	0	760.996	0	5639.92	1590.99	0	0	1465.56	1600.09
CFL1	Non-matrisome	Non-matrisome	GO:CC not extracellular matrix	P10668	P10668	COF1_PIG	0	0	4160.68	1995.1	3070.52	0	3165.17	1352.54	2872.08	2849.18	0	4202	2032.35	0	860.639	4938.82	2044.46	1756.7	0	0	9467.52	0	972.012	0	0	0	0	0	8377.69	2608.05	3218.33	0	0	0	0	1143.64	0	0	0	1986.53	1275.26	0	0
CFL2	Non-matrisome	Non-matrisome	GO:CC not extracellular matrix	Q5G6V9	P10668;Q5G6V9	COF2_PIG	0	143720	220039	135610	155656	137193	152602	79830.7	72416.6	65537.2	30597	105012	69577.7	23468300	118472	25991.4	209106	167418	168646	35677.8	54159.6	61407.7	67720.6	119756	75109.6	45802	23852.5	44942.8	30947.6	15042.1	37911.8	53791.8	75131.1	38991.4	96581.5	72910.6	44460.2	77062.3	51857.1	42683.1	44569.3	48932.2	64151.3
CGAS	Non-matrisome	Non-matrisome	GO:CC not extracellular matrix	I3LM39	I3LM39	CGAS_PIG	0	1468.85	0	1040.9	938.152	0	1564.69	0	1227.65	1654.67	2191.49	3507.64	2734.16	0	0	0	1079.46	418.2	0	1084.43	0	0	0	1234.15	0	5366.53	2384.59	3682.7	0	1130.29	2848.17	0	965.577	812.274	1454.68	883.977	1204.28	0	0	0	0	0	0
CGNL1	Non-matrisome	Non-matrisome	GO:CC not extracellular matrix	A0A286ZRZ8	A0A286ZRZ8	A0A286ZRZ8_PIG	0	0	0	0	3625.35	0	0	0	0	5524.47	4790.23	0	5531.73	0	0	0	0	0	0	0	0	0	0	0	0	0	0	0	0	5167.37	0	0	0	0	1275.11	0	0	0	0	0	0	0	0
CHAD	Core matrisome	Proteoglycans	GO:CC extracellular matrix (GO:0005576, GO:0005578 & GO:0031012) & GO:CC not extracellular matrix	A0A287A461	A0A287A461	A0A287A461_PIG	0	826.727	0	0	2113.69	0	4930.38	6396.92	8634.99	4994.52	13843.5	13642.2	3232.22	0	0	0	0	0	0	0	0	0	0	0	0	0	0	3819.13	0	0	0	0	0	0	0	0	0	0	0	4850.67	0	218.165	0
CHCHD2	Non-matrisome	Non-matrisome	GO:CC not extracellular matrix	F1RIU9	F1RIU9	F1RIU9_PIG	0	0	0	0	0	480.769	0	0	0	0	0	0	0	0	1081.29	0	2435.29	2732.76	2366.31	0	0	0	0	0	1485.89	0	0	0	0	0	0	0	0	0	0	852.993	0	0	0	0	0	0	0
CHCHD3	Non-matrisome	Non-matrisome	GO:CC not extracellular matrix	F1SNF6	F1SNF6	F1SNF6_PIG	0	36270.9	32088.4	33599.3	14715.6	34903.5	15915.6	10037.3	12586.4	11565.4	7353.34	20124.1	16464.4	0	31212.5	13936.9	35869.4	34585.1	38862.4	58922.4	50456.9	80422.1	65641.1	57894.9	78067.2	5651.02	8371.4	6658.08	20544.5	10309.7	16812.3	34123.4	35931.3	38506.9	67362.3	39250.3	51900.6	31284.9	17733.4	22010.4	7257.64	25234.2	22748.4
CHCHD6	Non-matrisome	Non-matrisome	GO:CC not extracellular matrix	A0A286ZX90	A0A286ZX90	A0A286ZX90_PIG	0	2521.13	0	3023.46	1269.59	2739.15	0	0	0	0	0	0	0	0	2463.4	4856.05	1795.24	3941.71	2560.97	3434.74	0	4819.81	2294.25	4287.73	4227.63	0	0	0	0	0	0	0	1932.57	2205.87	2710.46	3181.65	0	0	0	0	0	1868.35	0
CHD1	Non-matrisome	Non-matrisome	GO:CC not extracellular matrix	A0A5K1VUK9	A0A4X1UY74;A0A287BSL8;F1SDV1;A0A5K1VUK9;A0A480QH44;A0A287A4M4	A0A5K1VUK9_PIG	0	0	0	0	0	0	857.958	0	0	1094.52	1127.17	974.308	449.007	0	0	0	0	0	0	1597.81	830.476	0	0	0	211.212	5924.44	0	8522.43	1349.03	2969.83	4360.57	0	311.783	0	499.992	0	273.99	0	350.576	0	0	445.419	1497.18
CHD2	Non-matrisome	Non-matrisome	GO:CC not extracellular matrix	A0A287A4M4	A0A287A4M4	A0A287A4M4_PIG	0	0	0	0	0	0	0	0	0	1297.88	0	0	0	0	0	0	0	0	0	0	0	0	0	0	682.281	9532.11	0	4910.05	2741.47	2904.85	2561.26	0	0	0	0	0	0	0	0	0	0	0	0
CHD3	Non-matrisome	Non-matrisome	GO:CC not extracellular matrix	A0A287BG95	F1SSZ2;A0A287BG95	A0A287BG95_PIG	0	0	0	0	857.45	0	1082.86	1835.31	1622.19	1023.38	1842.74	2019.34	1817.44	0	0	0	0	0	0	0	0	0	0	0	0	3822.37	0	0	0	720.046	0	0	0	0	0	0	0	0	0	0	0	0	0
CHD4	Non-matrisome	Non-matrisome	GO:CC not extracellular matrix	F1SLR5	F1SSZ2;F1SLR5;A0A287BG95	F1SLR5_PIG	0	2081.83	3100.6	2179.41	3880.53	1238.84	5752.39	4415.06	5354.39	7444.98	4043.18	6226.31	6175.99	0	1133.8	0	1166.72	1718.4	0	3109.81	7583.98	3368.6	4040.51	2261.57	4166.05	13570.9	3756.52	5047.65	11200.2	13107.8	6735.79	1244.21	3244.77	3618.41	4312.55	2365.68	4751.89	3146.31	1804.32	2202.37	3270.92	2423.79	2173.51
CHERP	Non-matrisome	Non-matrisome	GO:CC not extracellular matrix	A0A287AC15	A0A287AC15	A0A287AC15_PIG	0	0	0	1273.38	1268.05	785.851	3590.04	4248.81	3102.75	3218.01	5805.09	6086.34	2085.43	0	0	0	0	963.648	0	0	0	731.538	0	1513.89	790.303	0	0	0	0	2104.04	7659.09	1477.03	0	1210.22	1290.45	763.109	1234.32	0	0	0	0	0	0
CHI3L1^	Non-matrisome	Non-matrisome	GO:CC extracellular matrix (GO:0005576, GO:0005578 & GO:0031012) & GO:CC not extracellular matrix	A0A287BKG2	A0A287BKG2	A0A287BKG2_PIG	0	894.871	2274.79	1779.01	1180.4	3243.56	11756.1	5479.81	2966.87	15754.8	5330.85	9758.65	9460.73	0	0	0	1367.83	17866.1	0	0	0	0	0	4001.24	1418.15	0	0	0	0	10918.9	0	0	0	0	8997.74	5573.85	859.603	0	0	0	0	1528	0
CHI3L1°	Non-matrisome	Non-matrisome	GO:CC extracellular matrix (GO:0005576, GO:0005578 & GO:0031012) & GO:CC not extracellular matrix	Q29411	Q29411;A0A287BKG2	CH3L1_PIG	0	0	0	0	0	0	0	0	1459.93	1912.54	1539.26	0	1427.94	0	0	0	0	1620.3	0	0	0	0	0	0	0	0	0	0	0	7030.18	0	0	0	0	0	1589.8	0	0	0	0	0	0	0
CHID1	Non-matrisome	Non-matrisome	GO:CC extracellular matrix (GO:0005576, GO:0005578 & GO:0031012) & GO:CC not extracellular matrix	F1RZ01	F1RZ01	F1RZ01_PIG	0	2199.88	2008.97	2390.68	3007.98	2413.76	5092.07	4834.09	3857.75	6804.7	6811.32	8381.9	3772.9	0	1471.07	5585.47	2179.89	1934.19	1920.03	1959.37	1964.65	0	1320.52	1809.39	1226.17	2485.36	0	3694.43	0	1165.08	0	865.663	1514.96	0	1423.6	2301.76	797.117	1187.76	831.587	0	1538.28	1795.22	1873.31
CHM	Non-matrisome	Non-matrisome	GO:CC not extracellular matrix	K7GL59	K7GL59	K7GL59_PIG	0	1038.24	947.958	2289.31	2050.9	1297.1	0	0	0	0	0	3041.55	0	0	1539.21	0	1798.89	2260.48	1519.9	0	1689.53	0	0	0	0	1373.27	0	0	0	1966.31	0	0	0	0	0	0	0	0	822.071	0	857.489	775.114	0
CHMP2A	Non-matrisome	Non-matrisome	GO:CC not extracellular matrix	I3LSS2	I3LSS2	I3LSS2_PIG	0	1613.71	1199.96	0	1978.2	2394.47	0	0	0	0	0	0	0	0	3111.94	0	1840.65	3207.25	0	2678.41	0	2208.65	2472.52	1209.59	1634.16	0	0	1435.65	0	4972.02	3925.1	0	1217.9	0	1461.73	2266.72	1797.97	0	0	0	0	0	0
CHMP2B	Non-matrisome	Non-matrisome	GO:CC extracellular matrix (GO:0005576, GO:0005578 & GO:0031012) & GO:CC not extracellular matrix	A0A287A1F6	A0A287A1F6	A0A287A1F6_PIG	0	1423.14	0	0	0	1773.15	0	0	0	0	3866.94	0	0	0	1307.13	0	1292.61	0	0	984.276	0	1563.29	828.462	1551.83	0	0	0	0	0	3993.66	0	0	0	0	0	1055.54	0	0	0	0	0	0	0
CHMP3	Non-matrisome	Non-matrisome	GO:CC not extracellular matrix	A0A8D0TE27	A0A8D0TE27	A0A8D0TE27_PIG	0	4817.48	3428.06	7517.3	6237.08	6360.08	10040.8	0	5578.24	4134.15	4895.24	0	8195.29	0	3346.69	0	5724.95	5487.56	9652.99	6491.19	10302.8	7865.13	8616.01	11390.4	11995.1	6129.61	9440.14	12337.9	8993.11	18253.9	11952.7	3247.12	3584.11	5265.23	8489.94	6602.31	9642.03	0	1406.18	0	0	3149.22	3223.33
CHMP4A	Non-matrisome	Non-matrisome	GO:CC not extracellular matrix	A0A4X1SRC3	A0A4X1SRC3	A0A4X1SRC3_PIG	0	0	0	0	0	968.555	0	0	0	1878.42	0	0	1113.16	0	827.961	0	0	0	676.366	1431.29	0	512.39	982.127	801.413	0	0	1355.22	0	0	2503.79	0	0	0	0	635.147	0	0	0	937.834	2085.87	0	679.082	0
CHMP4B	Non-matrisome	Non-matrisome	GO:CC not extracellular matrix	A0A4X1T3F8	A0A4X1T3F8	A0A4X1T3F8_PIG	0	5894.75	6043.57	5611.82	7245.11	8181.53	6263.51	0	9261.79	10118.1	8605.84	0	10749.8	0	8495.27	7453.12	7794.76	7365.01	7301.71	12997.4	19490.9	9927.73	13766.5	12447.5	11320.7	8601.3	22403.5	15375	6841.05	33464.6	21405.7	7167.51	7645.11	5051.14	10422.7	8052.95	10393.8	10773.1	7373.68	13718.2	8049.89	6266.62	12085.2
CHMP6	Non-matrisome	Non-matrisome	GO:CC not extracellular matrix	F1RZY6	F1RZY6	F1RZY6_PIG	0	1356.71	0	816.879	1890.42	994.035	0	2591.9	2722.5	3446.87	2454.83	0	0	0	735.101	0	746.673	868.116	702.946	0	0	0	0	0	734.157	0	0	0	0	1341.68	0	0	0	931.876	954.376	757.209	0	0	2338	0	2009.67	0	0
CHMP7	Non-matrisome	Non-matrisome	GO:CC not extracellular matrix	M3VK03	M3VK03	M3VK03_PIG	0	1942.55	7769.15	8116.93	2512.65	5971.85	8582.75	0	794.73	0	0	3098.71	6626.05	0	3751.25	0	3257.2	3517.35	7284.34	5146.22	11012.3	14106.5	9126.02	10443.5	15766.8	8802.59	0	6891.94	6962.67	9211.41	4089.79	7385.13	7974.09	5960.66	12866.3	7204.1	10527.9	6497.19	7159.12	0	5052.42	6298.1	0
CHORDC1	Non-matrisome	Non-matrisome	GO:CC not extracellular matrix	A9YUB1	A0A5G2QMC4;A9YUB1	CHRD1_PIG	0	1382.12	1418.61	1406.16	1866.04	2088.7	0	0	0	0	0	0	481.104	0	3114.96	0	1561.47	2004.31	2351.87	864.751	0	531.184	602.19	789.265	1090.71	0	0	0	0	919.434	0	0	933.743	1599.02	0	1330.38	0	0	1082	0	0	975.729	0
CHP1	Non-matrisome	Non-matrisome	GO:CC not extracellular matrix	A0A8D1HEQ6	A0A8D1HEQ6	A0A8D1HEQ6_PIG	0	3887.43	0	4370.1	2851.28	3324.54	2663.82	0	3997.07	2658.42	0	0	4833.79	647401	5556.11	0	4721.64	2764.74	4216.74	8978.77	5466.2	6830.18	8297.38	6228.26	6135.11	0	0	0	0	4129.84	0	4715.2	3340.1	4139.91	10118.4	4584.76	5808.06	3896.38	8205.82	11585.5	7866.5	5481.34	5575.47
CHPT1	Non-matrisome	Non-matrisome	GO:CC not extracellular matrix	A0A287B7T8	A0A287B7T8	A0A287B7T8_PIG	0	2742.59	0	2021.53	0	2048.05	0	0	0	0	1654.57	0	0	0	1333.69	0	1207.99	1828.74	1370.63	1428.74	0	0	0	0	0	0	0	0	0	0	0	1512.39	2655.88	3683.44	0	2545.9	0	2495.23	2723.56	0	2499.76	3187.35	3653.72
CHTOP	Non-matrisome	Non-matrisome	GO:CC not extracellular matrix	F8J1Q2	F8J1Q2	F8J1Q2_PIG	0	921.318	0	453.263	742.445	661.579	0	1431.94	0	1290.11	0	0	0	0	915.462	0	1106.52	679.733	1076.64	685.077	0	0	267.652	0	0	0	0	0	0	0	0	0	496.231	0	0	0	0	0	1219.95	0	0	966.674	0
CIAO2A	Non-matrisome	Non-matrisome	GO:CC not extracellular matrix	A0A287BQ89	A0A287BQ89	A0A287BQ89_PIG	0	0	0	1394.98	0	1226.62	2692.84	4787.16	2292.19	0	0	0	1960.25	0	1435.05	0	0	726.555	0	2363.48	3166.03	2191.84	2128.08	1506.64	2186.53	3789.05	0	0	0	1559.08	0	1753.57	2081.05	3152.92	2677.24	2445.38	2860.67	3846.56	2710.31	0	1948.36	2881.6	3780.46
CIAPIN1	Non-matrisome	Non-matrisome	GO:CC extracellular matrix (GO:0005576, GO:0005578 & GO:0031012) & GO:CC not extracellular matrix	I3L704	I3L704	I3L704_PIG	0	1327.49	0	897.062	1084.08	583.72	0	0	0	0	0	0	0	0	1358.82	0	886.732	0	1395.95	0	0	1141.78	932.231	1874.83	1429.41	0	0	0	0	827.235	0	0	873.645	900.134	0	628.257	0	0	1170.24	0	477.001	806.143	549.021
CIC	Non-matrisome	Non-matrisome	GO:CC not extracellular matrix	F1RGJ6	F1RGJ6	F1RGJ6_PIG	0	0	0	0	0	0	0	5652.78	2467.79	1840.98	4885.4	6105.62	3221.64	0	0	0	0	0	0	0	2121.21	0	0	0	942.95	5556.62	0	4724.6	4084.53	2012.29	0	0	0	0	0	0	0	0	0	0	0	0	0
CILP^	Core matrisome	ECM Glycoproteins	GO:CC not extracellular matrix	O19112	O19112;A0A287BRX8	CILP1_PIG	0	2343.12	0	1907.08	5232.59	2826.25	3916.12	6665.5	4536.2	10676.4	11661.5	10597.8	4734.96	0	3985.59	0	3936.59	0	2464.92	4520.2	3158.58	3365.45	2883.58	2921.39	2495.47	9523.04	25633.7	13488.2	0	6658.05	8651.59	0	3803.02	1929.38	4220.12	6805.54	1861.7	4969.76	6749.62	11016.8	20106.4	6379.39	4131.29
CILP2	Core matrisome	ECM Glycoproteins	GO:CC not extracellular matrix	F1S6Q3	F1S6Q3	F1S6Q3_PIG	0	1341.52	2304.34	3702.68	2287.42	3048.01	2412.56	18473.1	31906.7	7664.37	17747.5	36737.2	8268.27	0	0	0	0	0	0	11378.9	18311.5	4063.04	9813.37	0	0	25161.6	220292	88611.8	15750	8083.8	18729.9	0	0	0	0	5348.39	0	37252.2	9400.71	96305.2	46838	36685.2	5481.67
CIRBP	Non-matrisome	Non-matrisome	GO:CC not extracellular matrix	A0A287AK75	A0A287AK75	A0A287AK75_PIG	0	5827.28	4777.64	5165.43	4886.33	3358.31	3801.34	3840.46	3031.46	3040.29	3902.31	3624.84	4111.67	0	3319.26	0	5751.04	2141.85	4180.49	0	0	914.193	1336.4	1168.84	1281.47	0	0	0	0	0	0	0	1081.81	0	1642.85	908.494	0	0	802.742	0	0	0	0
CISD1	Non-matrisome	Non-matrisome	GO:CC not extracellular matrix	A0A8D0WFJ4	A0A8D0WFJ4;A0A287BBW3	A0A8D0WFJ4_PIG	0	15025	9739.74	9142.69	4690.15	10491.3	4903.97	2367.98	5483.64	2541.74	3891.38	8159.72	4779.54	0	17302.7	0	12960.7	10853.3	14607.4	13961.5	7576.02	21717.7	16306.4	15588.9	16194.3	0	4443.14	0	6095.33	2820.14	6356.71	13714	13669.9	14365.6	14860.9	16458.8	15055.2	18924.5	33620.5	43230.3	42227	23315.3	39554.6
CISD2	Non-matrisome	Non-matrisome	GO:CC not extracellular matrix	F1S108	F1S108	F1S108_PIG	0	5056.72	5224.73	4788.42	3611.68	3277.22	0	0	0	0	0	0	3131.45	0	7960.25	0	3608.7	3891.39	6149.28	5609.97	0	0	1902.48	3612.04	3190.2	0	5590.55	0	0	6192.42	0	5433.39	8557.81	4852.02	1900.16	6147	1486.58	37876.7	51555.2	48652.1	33943.2	15265.6	15226.7
CKAP4	Non-matrisome	Non-matrisome	GO:CC not extracellular matrix	F1SPP8	F1SPP8	F1SPP8_PIG	0	16969.3	12036.8	11549.2	43058.1	10937.3	60051.7	82450.2	57068	117295	109080	61964.5	90291.9	0	6001.8	23401.6	9801.75	6523.11	8867.08	19320.2	11726.6	5710.32	7327.53	7268.77	7604.53	68685.6	51200.8	67337.7	35027.7	134241	67690.5	8014.03	4440.27	10970.1	9745.76	10173.7	10539.5	11360.3	12641.7	9477.61	11253.6	15298.9	8556.36
CKAP5	Non-matrisome	Non-matrisome	GO:CC not extracellular matrix	A0A287AK10	A0A287AK10	A0A287AK10_PIG	0	2094.66	5377.96	3433.23	2905.83	1865.22	6726.34	4135.62	4169.48	7271.51	5073.64	10911.2	6862.54	0	1284.63	0	1829.04	1345.38	1813	2920.16	2964.65	1667.29	1589.24	2241.34	2347.81	4395.95	0	6433.7	0	3922.49	7086.98	0	2900.97	1846.31	1896.23	2068.91	2232.35	2256.17	1687.95	0	3731.6	2165.56	2165.77
CKB	Non-matrisome	Non-matrisome	GO:CC not extracellular matrix	Q29594	Q29594;I3LPB5	KCRB_PIG	0	2015.29	2657.44	6270.81	8230.83	4570.35	5834.79	3400.81	4287.23	1479.19	5657.68	3390.92	4661.8	0	5899.87	0	8193.8	5464.45	4438.44	4021.3	0	1924.7	1827.27	4643.43	2251.05	0	0	0	0	0	0	0	1890.62	3684.52	1797.72	2503.9	1366.9	2638.65	2097.49	0	3056.63	3274.39	2676.13
CKM	Non-matrisome	Non-matrisome	GO:CC not extracellular matrix	Q5XLD3	A0A5G2QZN6;Q2HYU1;Q5XLD3;Q29577;F1SI77	KCRM_PIG	0	2279970	4771050	4155960	3119220	3270370	3014960	1645950	1624530	587912	370081	1719900	985352	133696000	1650850	1240980	3263300	3837740	3714670	1647430	1273400	1636710	1692470	2799360	1699150	172703	277352	168309	501279	361461	348036	1434700	2219340	1606670	1846030	1860180	2295870	1208100	1632150	912566	719270	1543930	1463160
CKMT2	Non-matrisome	Non-matrisome	GO:CC not extracellular matrix	Q2HYU1	Q2HYU1	Q2HYU1_PIG	0	441048	597517	480881	354554	602248	249888	53399.2	132254	25799.6	13829.5	181332	107688	38104500	486062	90665.2	771020	636950	761184	113493	85774.1	69744.5	208220	337046	161915	14582.2	25984.3	9426.29	50978.9	18341.6	38746.3	129824	188174	166913	150039	334652	111588	249004	311826	221687	245043	287111	493937
CLASP1	Non-matrisome	Non-matrisome	GO:CC not extracellular matrix	A0A8W4FP19	A0A8W4FP19	A0A8W4FP19_PIG	0	3469.59	4202.99	5352.79	4663.4	4044.69	6436.59	4911.25	2897.33	5612.97	4547.39	7655.88	6974.36	0	2995.62	0	4254.71	4093.37	4458.56	5941.8	9845.94	8095.18	7092.88	7425.39	6851.78	8301.82	0	11509	6447.48	5612.19	5263.53	7077.29	5939.5	5337.07	9177.07	5932.61	7704.03	6303.02	6163.08	8582.71	7984.42	6163.76	6160.62
CLASP2	Non-matrisome	Non-matrisome	GO:CC not extracellular matrix	F1RRD7	F1RRD7	F1RRD7_PIG	0	925.353	0	3264.67	1549.03	1762.19	1861.18	0	1448.85	1837.95	1234.05	1591.33	1454.74	0	312.349	0	0	879.174	854.781	1827.72	1493.15	1205.31	1218.44	0	1711.74	4523.32	3730.95	10206	6896.57	2153.76	4135.87	2173.57	903.987	1481.43	2075.39	1152.08	1794.47	1269.02	1546.94	2439.69	2649.79	1673.61	3766.18
CLCC1	Non-matrisome	Non-matrisome	GO:CC not extracellular matrix	F1S5Y7	F1S5Y7	F1S5Y7_PIG	0	5127.3	8102.91	5767.97	1874.42	5274.19	8666.43	8847.33	2447.33	3858.7	7173.4	3531.25	8273.45	0	3315.42	0	3618.02	6368.41	3778.26	1874.79	4592.04	0	1410.35	1739.59	2688.26	0	1493.47	6874.68	0	1717.73	0	1373.63	8750.13	5942.64	1371.06	4978.38	1132.28	14654.9	3284.8	0	11818.9	2594.72	10323.4
CLCN1	Non-matrisome	Non-matrisome	GO:CC not extracellular matrix	F1SRV8	F1SRV8	F1SRV8_PIG	0	0	0	1752.79	0	0	0	0	0	0	0	0	0	0	1531.27	0	0	1561.11	1260.29	0	0	0	0	0	1685.73	0	0	0	0	0	0	0	1818.5	1312.34	0	1126.27	0	0	1031.23	0	3358.18	1537.92	0
CLDN5	Non-matrisome	Non-matrisome	GO:CC not extracellular matrix	C3VML1	C3VML1	C3VML1_PIG	0	0	0	0	0	0	0	0	0	0	0	0	0	0	0	0	0	0	0	0	0	0	0	0	0	0	0	0	0	0	0	0	0	0	0	0	0	0	1223.44	0	1679.82	819.71	0
CLEC11A	Matrisome-associated	ECM-affiliated Proteins	GO:CC extracellular matrix (GO:0005576, GO:0005578 & GO:0031012) & GO:CC not extracellular matrix	A0A287AAI1	A0A287AAI1	A0A287AAI1_PIG	0	1134.55	0	0	3633.21	1585.38	9958.04	8511.3	9903.18	8937.56	14266.9	28452	9808.49	0	0	0	3108.68	1331.9	0	3267.18	9057.77	0	892.424	1161.35	625.899	30323.1	21021.7	40493.2	33314.4	16737.5	15543.8	0	0	2005.93	2230.55	1493.37	2013.44	0	696.964	6246.98	5444.02	1753.2	4938.32
CLEC14A	Matrisome-associated	ECM-affiliated Proteins	GO:CC not extracellular matrix	F1SHL0	F1SHL0	F1SHL0_PIG	0	15984.7	24732.4	31910.7	6547.14	28963.3	36466.8	16513.7	7845.96	35534.9	32882.5	21702.8	48839	0	11601	0	23889.1	31866.4	35032.9	2192.87	13522.4	7679.76	6578.21	13487.9	7114.24	8202.42	8626.53	15271.5	0	3800.89	6994.87	4650.38	11489.5	11737.8	11931.2	10237.4	11425.2	7085.51	16047.6	6780.44	5811.1	20186.9	13969.9
CLEC16A	Non-matrisome	Non-matrisome	GO:CC not extracellular matrix	A0A5G2QTZ4	A0A5G2QTZ4	A0A5G2QTZ4_PIG	0	0	0	0	824.74	453.918	1525.43	0	962.002	0	726.721	0	0	0	262.643	0	422.124	807.596	510.447	0	0	0	439.182	0	502.127	1960.55	0	0	21601.4	496.874	0	0	689.158	703.141	645.769	643.566	891.2	0	670.132	0	458.936	498.98	0
CLEC3B	Matrisome-associated	ECM-affiliated Proteins	GO:CC extracellular matrix (GO:0005576, GO:0005578 & GO:0031012) & GO:CC not extracellular matrix	F1SRC8	F1SRC8	F1SRC8_PIG	0	17505.2	16208.8	19762.1	60283.7	13773	52094.5	74634.2	82655	78808.1	141115	109177	77275.5	0	11791	28387.9	23460.6	6868.31	9997.74	4760.38	6224.5	733.984	2845.22	3660.38	1653.02	12171.4	7166.79	10115.8	12021.3	15798.1	4851.55	3716.68	2359.55	1305.65	3465.63	2103.93	1276.5	4908.93	2261.14	2862.4	3993.38	1463.41	2266.96
CLIC1^	Non-matrisome	Non-matrisome	GO:CC not extracellular matrix	A0A4X1VDN4	A0A4X1VDN4;A0A286ZVF0	A0A4X1VDN4_PIG	0	2737.63	3658	2856.29	4496.12	3607.19	2795.28	5123.42	3709.74	4075.78	3948.65	0	3427.86	0	3766.83	7842.13	2675.74	3279.91	4074.8	936.068	0	0	707.721	775.136	692.835	2619.9	2700.87	0	0	5103.58	0	0	499.047	1059.18	0	1361.22	0	1096.9	789.789	0	1904.84	2119.43	0
CLIC1°	Non-matrisome	Non-matrisome	GO:CC not extracellular matrix	Q29238	A0A4X1VDN4;Q29238	CLIC1_PIG	0	2041.2	3180.01	0	3460.65	2844.69	4853.24	3588.22	5042.97	6082.13	6252.62	5702.19	5094.95	0	2493.28	0	2049.93	3114.55	2297.55	0	4269.29	0	0	2405.8	0	7224.03	4834.33	5396.58	11048.8	7049.26	6972.87	0	0	0	1556.78	0	0	0	1839.57	0	0	1898.99	0
CLIC4	Non-matrisome	Non-matrisome	GO:CC not extracellular matrix	A0A287ADH9	A0A287ADH9	A0A287ADH9_PIG	0	2478.39	0	1858.53	2275.93	2367.23	0	2455.46	0	4986.3	5647.87	3586.02	3390.37	0	2040.36	0	3228.2	1882.26	2955.8	1331.97	0	0	886.613	917.046	2116.84	0	7112.89	4920.18	9091.31	3012.07	5833.51	0	1023.56	2508.77	0	1362.13	0	0	996.375	0	0	0	1828.71
CLIC5	Non-matrisome	Non-matrisome	GO:CC not extracellular matrix	A0A5G2Q7W2	A0A5G2Q7W2	A0A5G2Q7W2_PIG	0	15882.5	27426.5	18124.2	17164.2	19597.8	17377.9	15135.4	12235.5	16034.4	12914	12057.1	12796.6	0	12436.3	0	18028.5	15187.5	17884	15804	21841.5	18132.8	17962	18081.1	22953.7	10033.3	56442.8	95721.8	4609.32	9255	0	16932.8	13958.6	13567.2	22315.4	13990.1	15439.6	23497.7	13671.2	10709	16299.6	18219.7	22381.2
CLINT1	Non-matrisome	Non-matrisome	GO:CC not extracellular matrix	A0A8D1KBT2	A0A8D1KBT2	A0A8D1KBT2_PIG	0	2876.38	0	0	3039	0	3231.12	23313.2	3448.53	8938.74	22364.8	21685.8	1275.04	0	2358.15	4839.99	2677.95	3202.57	2478.02	691.939	3865.74	3383.26	2098.96	4179.39	2514.46	12681.6	7522.19	1796.38	6717.66	1467.88	2844.22	3832.61	2237.53	0	3787.91	2174.91	0	0	0	0	0	1682.26	0
CLIP1	Non-matrisome	Non-matrisome	GO:CC not extracellular matrix	A0A287B7U5	A0A287B7U5	A0A287B7U5_PIG	0	1888.14	3418.36	1915.89	2090.62	1567.88	2043.15	0	2074.62	1989.87	0	0	1254.09	0	1922.67	0	2122.83	2156.13	1799.41	0	0	0	755.661	1253.66	382.56	0	0	0	0	1157.64	0	0	1315.76	1726.67	0	1169.99	0	2593.23	1700.45	0	0	1106.15	1666.62
CLK4	Non-matrisome	Non-matrisome	GO:CC not extracellular matrix	A0A4X1VVL0	A0A4X1VVL0	A0A4X1VVL0_PIG	0	731.058	0	0	0	0	0	0	0	1012.7	0	0	0	0	0	0	0	0	0	0	743.974	0	0	0	406.014	0	0	0	0	733.511	0	0	780.339	740.613	0	0	862.082	0	461.963	0	0	586.294	0
CLNS1A	Non-matrisome	Non-matrisome	GO:CC not extracellular matrix	A0A8W4FGH2	A0A8W4FGH2	A0A8W4FGH2_PIG	0	1219.69	0	1793.64	926.043	2400.85	0	0	0	0	0	1808.03	0	0	1549.62	0	1878.15	1636.26	2389.67	2346.61	2651.06	2662.12	3123.67	3981.94	3760.1	0	0	0	0	2530.5	0	1756.36	1725.42	2686.62	2588.29	1624.1	2682.67	0	0	0	0	0	0
CLP1	Non-matrisome	Non-matrisome	GO:CC not extracellular matrix	A0A286ZKE4	A0A286ZKE4	A0A286ZKE4_PIG	0	1040.56	0	1501.66	0	845.797	1943.31	1933.61	0	2325.05	3751.22	2160.79	1328.36	0	0	0	707.352	0	0	875.791	1776.57	484.969	604.888	0	1014.73	5642.4	2687.02	9320.26	0	4502.07	0	0	0	631.32	1096.28	601.66	1541.6	0	0	0	0	0	0
CLPB	Non-matrisome	Non-matrisome	GO:CC not extracellular matrix	A0A286ZU72	A0A286ZU72	A0A286ZU72_PIG	0	1481.6	0	0	2031.88	0	0	0	0	0	0	0	0	0	1115.67	0	0	0	1529.55	3464.96	0	0	1164.89	1987.6	1396.46	0	0	0	0	0	0	0	1398.15	1444.56	1047.67	1191.31	4797.7	0	1664.42	0	0	1325.77	1946.67
CLPP	Non-matrisome	Non-matrisome	GO:CC not extracellular matrix	A0A286ZRL1	A0A286ZRL1	A0A286ZRL1_PIG	0	1842.49	0	3235.19	2046.09	2018.07	0	0	0	1544.99	0	0	0	0	2473.46	0	2626.54	1673.18	2577.49	1667.98	0	1367.41	1480.1	3147.91	1498.66	0	0	0	0	1818.22	0	0	0	1147.24	0	1385.52	0	0	1750.75	0	0	1119.09	1194.39
CLPTM1	Non-matrisome	Non-matrisome	GO:CC not extracellular matrix	A0A286ZY44	A0A286ZY44	A0A286ZY44_PIG	0	0	0	555.802	0	257.429	1024.71	0	0	0	0	0	0	0	0	0	0	338.03	0	0	0	0	0	0	0	0	0	0	0	0	0	0	1492.66	0	0	0	0	0	855.983	0	723.248	0	0
CLPTM1L	Non-matrisome	Non-matrisome	GO:CC not extracellular matrix	F1S026	F1S026	F1S026_PIG	0	1044.84	492.334	1355.37	933.449	1141.13	1759.13	7526.98	3125.72	6871.46	5780.75	4343.09	2025.18	0	2396.42	0	0	779.683	510.918	1585.34	2279.05	0	376.55	0	974.376	3615.43	4813.44	5355.07	0	2790.96	2155.95	1493.53	1674.23	2329.5	0	1612.79	1162.57	3349.96	1309.56	3227.17	4542.54	2422.98	2404.27
CLPX	Non-matrisome	Non-matrisome	GO:CC not extracellular matrix	A0A287ADU8	A0A287ADU8	A0A287ADU8_PIG	0	3987.38	4213.56	2999.5	2301.1	3123.33	3855.3	0	0	3052.42	0	0	2955.56	0	3529.88	0	2523.87	2610.42	3278.2	4816.48	3606.03	5230.86	6558.06	3141.72	4079.68	0	0	0	0	3607.75	0	0	3859.85	2666.55	6326.96	3649.56	7463.12	3620.64	2528.61	0	2751.92	3207.18	5288.82
CLTA	Non-matrisome	Non-matrisome	GO:CC not extracellular matrix	A0A287A682	A0A287A682	A0A287A682_PIG	0	7816.6	8014.1	9137.58	19988.6	4507.95	27457.2	19592.1	24096.7	55211.2	29894.1	33277.6	50963.1	0	6443.45	0	7137.52	4387.93	3564.32	17144	17723.6	0	0	0	0	78046.6	21093.9	60669.1	46104.3	61301.5	49975.7	2267.07	0	4189.44	13438	0	8808.85	0	0	0	0	0	0
CLTB^	Non-matrisome	Non-matrisome	GO:CC not extracellular matrix	F1S398	F1S398	F1S398_PIG	0	7370.39	9097.8	7305.45	9881.64	0	13190.1	0	0	14903.2	0	0	14974.5	0	2866.15	0	0	5154.05	0	0	0	0	0	0	0	0	0	0	0	0	0	0	4199.33	0	0	0	0	0	0	0	0	0	0
CLTB°	Non-matrisome	Non-matrisome	GO:CC not extracellular matrix	A0A287BFZ5	A0A287BFZ5	A0A287BFZ5_PIG	0	5711.08	8056.57	6539.44	11053.6	4986.22	11735.1	22817.7	10880.5	19990.6	23799.9	0	18082.9	0	3313.57	21196.3	5757.43	4470.41	5068.52	6455.52	0	3547.64	4171.44	6936.8	4716.88	0	0	9272.43	0	9064.91	0	0	3540.72	3212.09	8257.53	3334.54	2881.21	0	0	0	0	0	0
CLTC	Non-matrisome	Non-matrisome	GO:CC not extracellular matrix	I3LGD4	I3LGD4	I3LGD4_PIG	0	92229.8	79485.1	85999.6	179530	76147.2	172823	333638	262252	393911	489879	273242	247973	0	55823	52809.4	31376.3	66210.8	66151.7	124574	137962	22193.2	31838.8	37261.6	40190.1	466655	365174	572034	406768	431903	396791	57161.2	66155.1	123505	43467.2	88262.7	49960.8	81176.7	57774.1	95870.9	80193.1	78743.8	89258
CLU	Non-matrisome	Non-matrisome	GO:CC extracellular matrix (GO:0005576, GO:0005578 & GO:0031012) & GO:CC not extracellular matrix	Q29549	Q29549;A0A5S8KLN1	CLUS_PIG	0	26522.6	31733	31371.8	51879.8	37711	68045.6	55796	92470.9	71037.2	82333	63305.2	79853.3	0	26762.2	23625.2	39469.8	29602.4	20634.6	65773.8	70181.2	33733.1	41509.7	66672.9	51493.3	109825	125088	125232	68846.4	204126	83566.3	36029.9	23839.1	30554.8	34381.5	32463	51863	14714	17772.1	13788.8	14507.8	28039	12139.4
CLUH	Non-matrisome	Non-matrisome	GO:CC not extracellular matrix	A0A287BR17	A0A287BR17	A0A287BR17_PIG	0	1398.53	3654.78	1577.1	1990.76	1240.65	2574.45	0	0	0	0	0	2121.21	0	1168.12	0	1404.52	1513.17	1784.04	0	4309.72	0	1116.9	1190.65	1089.33	3871.17	0	0	0	2565.8	3493.53	0	982.678	1950.4	1498.94	1343.03	1498.24	3052.96	1341.56	2377.05	1415.41	2097.42	2765.91
CLYBL	Non-matrisome	Non-matrisome	GO:CC not extracellular matrix	A0A287ABH0	A0A287ABH0	A0A287ABH0_PIG	0	6909.52	7831.36	6227.22	7939.04	8035.84	6122.51	2370.09	2752.23	0	0	3943.18	2848.34	0	6652.31	14241	13003.4	7500.33	9977.71	1923.15	2276.11	0	1937.87	4987.6	1370.02	0	0	0	0	1485.21	0	0	2475.26	1193.73	3035.12	3259.23	1176.64	4434.92	4081.79	0	2889.08	5494.4	6457.87
CMAH	Non-matrisome	Non-matrisome	gene not present in GO IDs	F1RUD5	F1RUD5;O19074	F1RUD5_PIG	0	0	0	0	1358.76	1353.99	0	1540.7	0	3270.15	1753.44	1696.71	2044.13	0	0	0	0	1545.22	0	0	0	0	0	0	0	3586.25	0	0	0	0	0	0	0	0	0	0	0	0	0	0	0	0	0
CMAS	Non-matrisome	Non-matrisome	GO:CC not extracellular matrix	A0A287BS35	A0A287BS35	A0A287BS35_PIG	0	2355.57	0	1602.4	3020.84	1787.46	4804.8	7256.83	0	4712.83	7974.59	8537.32	4567.37	0	1221.86	0	2111.22	1676.77	0	2525.69	0	1865.06	1878.7	1226.96	1378.97	0	0	8555.25	0	2515.45	0	0	1508.61	1600.13	2822.92	1667.72	3094.4	0	2218.02	0	0	1834.85	0
CMBL	Non-matrisome	Non-matrisome	GO:CC not extracellular matrix	A0A287A6V9	A0A287A6V9	A0A287A6V9_PIG	0	76232.5	172692	108331	110601	123391	103054	48079.8	53935.5	19931.7	28061.4	73519.7	40772.1	0	145913	48142.7	160455	124250	123049	8090.19	9406.68	4120.33	7365.72	18380.7	7318.58	14512.7	7973.38	13293.3	7232.77	4177.41	3969.27	7651.58	14087.5	9839.1	5835.93	14814.4	5303.16	35937.8	38739.9	24228.4	20838.9	41634.8	36532.3
CMC2	Non-matrisome	Non-matrisome	GO:CC not extracellular matrix	A0A4X1SXY7	A0A4X1SXY7	A0A4X1SXY7_PIG	0	4423.99	2218.85	3901.94	1945.94	2721.43	0	0	0	0	0	0	0	0	5212.56	0	3675.99	1933.4	0	0	0	2090.06	1232.38	1514.73	1692.05	0	0	0	0	0	0	0	0	0	0	0	0	0	0	0	0	0	0
CMPK1	Non-matrisome	Non-matrisome	GO:CC not extracellular matrix	Q29561	Q29561	KCY_PIG	0	10710.9	7808.1	9348.15	10230	6861.32	12044.3	15647.3	18891.2	12324	22878.8	47331.7	15545.8	0	6373.57	29895.5	15476.5	7595.88	8974.73	8854.8	31011.1	7543.91	6882.07	9431.76	9581.21	21672.8	9308.3	13804.8	16818.8	10119.6	12904.4	5898.6	3747.2	6593.06	5265.32	5187.05	5651.11	4792.98	1827.6	8119.12	16316.8	4644.34	10717.3
CMPK2	Non-matrisome	Non-matrisome	GO:CC not extracellular matrix	A0A5G2RG89	A0A5G2RG89	A0A5G2RG89_PIG	0	1196.4	2278.47	2161.44	3635.83	2343.28	2255.57	9363.26	2591.44	3985.5	5594.13	4282.03	3312.18	0	878.421	0	0	2469.86	0	3360.6	4407.91	2165.47	2593.16	1814.29	2639.94	8671.36	7647.02	7468.59	12921	4497.13	6802.58	6549.78	1742.13	3025.7	2737.35	1909.05	4060.54	2661.57	1985.92	6365.53	3582.79	2426.88	4318.37
CMSS1	Non-matrisome	Non-matrisome	GO:CC not extracellular matrix	A0A8D0VXB3	A0A8D0VXB3	A0A8D0VXB3_PIG	0	1683.48	1408.4	0	2334.59	1134.68	7974.57	12924.3	5569.86	6080.78	13895	8186.56	4399.03	0	0	0	1332.53	821.728	0	0	3016.03	0	566.889	1388.33	1278.26	0	2087.81	2730.54	0	4441.85	1295.14	0	994.44	1130.15	0	1179.09	0	0	0	0	0	0	0
CMTR1	Non-matrisome	Non-matrisome	GO:CC not extracellular matrix	F1RVS1	F1RVS1	F1RVS1_PIG	0	1780.91	2561.13	1375.29	2309.81	1408.52	5004	8219.54	5369.46	3971.41	8304.56	6433.11	3946.36	0	456.176	0	1539.68	1464.06	0	1570.67	3622.9	783.81	0	1217.91	1933.87	6778.02	3693.08	0	6840.31	6523.63	5413.9	0	1004.72	1239.93	1380.86	958.029	1864.03	2645.94	0	0	0	1476.48	0
CMYA5	Non-matrisome	Non-matrisome	GO:CC not extracellular matrix	A0A286ZYS8	A0A286ZYS8	A0A286ZYS8_PIG	0	5762.21	7226.53	6755.59	4029.34	6219.2	4329.03	0	2320.76	0	0	3326.87	0	0	5596.94	19650.2	5137.21	6004.46	5285.14	7685.59	10314.7	7127.62	7602.06	7271.05	5912.72	0	0	0	0	0	0	6887.93	7555.1	7147.23	7035.57	5850.72	6385.68	9412.01	6292.39	11433	8362.34	4804.74	9958.38
CNDP2	Non-matrisome	Non-matrisome	GO:CC not extracellular matrix	F1SNL7	F1SNL7	F1SNL7_PIG	0	3291.75	4096.65	3733.35	4889.13	4149.24	4691.09	3676.92	4752.02	4726.65	5437.08	4376.6	3853.73	0	5223.68	0	4629.68	4240.88	3920.46	1887.85	0	1258.41	1187.93	2564.7	1470.41	0	6397.72	0	0	4815.49	0	0	1327.98	1397.36	1570.06	2233.46	606.306	2873.36	2342.53	0	2338.28	1871.16	2332.06
CNN1	Non-matrisome	Non-matrisome	GO:CC not extracellular matrix	Q08092	A0A287A4S3;Q08092	CNN1_PIG	0	8471.04	4702.82	18085.2	11297	6071.76	5241.92	5869.81	3946.17	3451.1	9969.23	0	6460.74	0	9644.31	33070.4	5962.86	5399.1	6150.4	0	0	3116.64	3552.03	8141.93	3557.17	0	0	0	0	5869.04	0	2853	4443.68	2922.93	0	2505.47	5164.02	4332.49	7780.97	6206.92	5347.32	12169.5	4050.3
CNN2	Non-matrisome	Non-matrisome	GO:CC extracellular matrix (GO:0005576, GO:0005578 & GO:0031012) & GO:CC not extracellular matrix	Q08094	Q08094;I3LUJ5	CNN2_PIG	0	6213.38	5010.92	6662.69	8804.01	6842.27	8827.18	20542	11470.7	26644.7	23457.3	25817.3	16196.5	0	2512.79	0	4979.54	4676.78	4967.52	2756.42	3201.57	1608.99	1767.14	3840.13	1885.38	19863.6	6824.89	6714.34	1966.41	6172.26	1942.11	1623.91	1824.1	2138.44	2747.98	3435.79	2507.2	2096.99	2449.8	3501.11	3153.84	2005.37	2798.16
CNN3	Non-matrisome	Non-matrisome	GO:CC not extracellular matrix	A0A5G2QAL2	A0A5G2QAL2	A0A5G2QAL2_PIG	0	4235.95	3343.73	3531	4966.82	3401.63	8056.2	13150.6	9397.47	12752.5	17305.9	10605.4	8485.97	0	1482.6	0	2892.02	2012.57	2242.71	2653.19	0	1142.83	1511.51	1466.12	2090.44	12543.1	5661.99	7250.62	6396.24	7651.08	7712.32	0	0	1696.5	564.187	1399.11	2425.41	0	0	0	2466.76	2619.14	0
CNOT1	Non-matrisome	Non-matrisome	GO:CC not extracellular matrix	A0A8D1KUF6	A0A8D1KUF6	A0A8D1KUF6_PIG	0	2356.98	3477.49	3195.28	4613.71	2166.49	6881.19	9152.19	7266.91	6255.57	8492.01	9780.66	7745.78	0	996.624	0	1710.6	2149.99	1566.25	2697.5	4880.11	1588.35	1497.18	1371.45	5662.24	13339.5	4546.98	6563.86	8019.23	7277.69	5927.72	2601.32	2256.62	4394.81	2813.11	2861.09	3202.34	3545.76	2323.23	5216.81	4515.84	2812.26	4094.5
CNOT10	Non-matrisome	Non-matrisome	GO:CC not extracellular matrix	A0A5G2R9Z1	A0A5G2R9Z1	A0A5G2R9Z1_PIG	0	1874.89	0	0	1625.3	878.357	1226.87	7482.31	1199.1	2637.01	3214.02	835.874	1429.15	0	1148.21	0	1057.66	1071.58	0	1147.8	1247.6	592.704	369.493	888.562	830.194	2690.6	0	1694.35	1394.93	2393.69	0	0	890.323	744.561	980.66	943.185	592.297	0	0	0	0	0	708.714
CNOT11	Non-matrisome	Non-matrisome	GO:CC not extracellular matrix	F1STG2	F1STG2	F1STG2_PIG	0	0	0	0	1197.11	0	1343.13	1779.13	0	1492.79	2211.28	3301.35	2549.99	0	0	0	0	0	0	0	0	0	707.159	0	0	1773.64	0	5724.19	0	2681.08	5223.65	0	0	0	968.645	0	781.399	2040.19	0	0	0	0	0
CNOT7	Non-matrisome	Non-matrisome	GO:CC not extracellular matrix	A0A4X1U0W1	A0A4X1U0W1	A0A4X1U0W1_PIG	0	0	0	0	0	0	0	0	4593.83	5009.76	4801.38	4992.7	2806.44	0	0	0	0	0	0	0	0	0	0	0	0	8336.63	3898.02	5225.8	4703.61	5410.27	4269.13	0	0	0	0	0	0	0	0	0	0	0	0
CNOT9	Non-matrisome	Non-matrisome	GO:CC not extracellular matrix	A0A8D1DV46	A0A8D1DV46	A0A8D1DV46_PIG	0	2302.39	0	0	1112.1	657.09	1915.95	9133.02	2368.1	3029.72	8058.37	3188.8	1804.65	0	0	0	0	808.106	564.028	0	0	0	0	0	0	8071.83	0	14717	2718.09	3084.02	0	0	0	0	0	0	0	0	0	0	0	0	0
CNP	Non-matrisome	Non-matrisome	GO:CC not extracellular matrix	A0A287A9L8	A0A287A9L8	A0A287A9L8_PIG	0	4577.06	3089.8	6606.21	5922.21	5334.99	8785.8	8437.46	7796.48	14175.8	12956.9	12321.3	11517.7	0	4116.16	0	3554.94	4559.17	4279.98	6547.16	7116.72	2753.81	3789.61	4372.96	3055.49	2158.39	5050.34	14821.5	7019.49	10378.7	7780.07	6708.98	5409.56	7622.92	3730.87	5932.18	4501.06	4795.51	4700.83	0	4185.43	5194.56	3302.38
CNPY2	Non-matrisome	Non-matrisome	GO:CC not extracellular matrix	A0A4X1W9B8	A0A4X1W9B8	A0A4X1W9B8_PIG	0	5655.32	5181.88	3960.93	10486.4	4877.88	10337.1	13115.1	12466.9	24668.8	18114.9	19042.8	12887.8	0	4397.18	11764.7	7589.56	4039.41	3544.78	5636.33	3794.91	2150.04	1594.36	2366.71	1719.66	5535.32	3059.57	6387.26	0	2663.14	0	0	2686.94	2707.31	3145.91	2617.94	1852.54	1262.2	1351.77	0	0	0	0
CNPY3	Non-matrisome	Non-matrisome	GO:CC not extracellular matrix	A5GFQ5	A5GFQ5	CNPY3_PIG	0	1779.6	0	1088.67	2173.74	2267.08	0	0	0	2044.47	0	0	3047.3	0	2541.47	0	2056.07	2494.47	1753.01	1067.8	0	0	677.153	679.536	806.52	0	0	0	0	2293.81	0	0	837.47	0	1024.22	1090.56	0	0	0	0	0	0	0
CNPY4	Non-matrisome	Non-matrisome	GO:CC extracellular matrix (GO:0005576, GO:0005578 & GO:0031012) & GO:CC not extracellular matrix	A0A287BQG2	A0A287BQG2	A0A287BQG2_PIG	0	1528.85	0	1942.99	1982.87	1422.49	3684.97	0	0	4083.11	2260.79	0	4705.99	0	0	0	1984.15	1305.44	1732.96	1441.16	0	0	445.957	0	0	0	1289.88	0	0	3189.14	0	0	0	0	709.538	1103.12	737.687	0	0	0	0	0	0
CNRIP1	Non-matrisome	Non-matrisome	GO:CC not extracellular matrix	A0A5G2QNN7	A0A5G2QNN7	A0A5G2QNN7_PIG	0	659.24	0	888.263	1210.48	1017	0	1997.55	2115.22	3646.08	4182.48	3739.54	2815.1	0	1262.23	0	939.294	625.416	754.766	1046.71	0	768.309	633.893	1202.78	590.801	0	0	0	0	1531.2	0	0	1074.65	446.665	1381	831.865	448.855	0	0	0	0	615.073	0
CNTFR	Non-matrisome	Non-matrisome	GO:CC not extracellular matrix	F1SEB5	F1SEB5	F1SEB5_PIG	0	0	0	0	2362.88	2202.78	0	0	2609.2	0	0	3932.74	0	0	11491	0	3987	1608.75	2754.23	0	0	0	0	0	0	0	0	0	0	0	0	0	0	0	0	0	0	10673.1	10674.8	12387.7	6656.19	0	0
CNTN1	Non-matrisome	Non-matrisome	GO:CC not extracellular matrix	A0A287B9Q3	A0A287B9Q3	A0A287B9Q3_PIG	0	0	2539.48	1741.78	2949.64	0	12521.5	14149.1	7303.43	10749.3	7672.19	28494.3	9329.37	0	1195.16	0	0	0	0	0	2680.16	0	0	0	0	15613.6	0	9706.72	0	0	0	0	0	0	0	0	0	0	0	0	0	0	0
COA1	Non-matrisome	Non-matrisome	GO:CC not extracellular matrix	I3LR62	I3LR62	I3LR62_PIG	0	8320.39	14382.2	14238.6	4720.76	11102.3	8889.21	3114.32	1853.76	4467.14	2319.43	3592	3730.34	0	6568.59	0	13876.7	12647.5	11938.1	12669.4	17506.8	34556.4	16824.6	16071.5	26234.4	1989.16	0	0	4235.57	2602.41	6068.47	10075.6	15882.5	11887.2	19517	10997.3	21548.9	14466.4	10834.4	5488.82	11782.9	8503.42	11390.8
COA3	Non-matrisome	Non-matrisome	GO:CC not extracellular matrix	A0A8W4FMM4	A0A8W4FMM4	A0A8W4FMM4_PIG	0	10811.1	11786.5	8315.14	5210.77	7088.84	0	0	2903.01	2912.27	0	0	3321.24	0	10539.8	0	10929.4	7520.94	11652.8	10481	0	10769.9	6952.21	6357.76	8896.14	0	0	0	0	6208.37	0	4592.62	5702.86	6215.42	11341.3	5085.52	6404.59	20586.1	29398.3	35573.3	35692.8	24324.4	24387.9
COA6	Non-matrisome	Non-matrisome	GO:CC not extracellular matrix	F1RGW3	F1RGW3	F1RGW3_PIG	0	3138.05	6372.9	4891.05	4718.97	4776.83	0	0	0	0	0	0	0	0	5744.22	12206.1	5978.12	3955.24	3474.11	0	0	2825.28	4581.25	4742.01	4451.51	0	0	0	0	0	0	0	3945.09	0	5902.75	3800.29	4909.41	0	0	0	0	0	0
COASY	Non-matrisome	Non-matrisome	GO:CC not extracellular matrix	Q8MIR4	Q8MIR4	COASY_PIG	0	2535.76	2167	1337.19	3445.18	2929.86	1601.6	0	1727.37	1374.66	1490.16	2688.7	1449.41	0	4788.79	0	3173.34	2436.36	3235.93	1895.15	2145.45	3516.2	5527.79	4467.22	3673.42	0	0	0	0	4791.24	0	1991.38	2480.55	1790.16	3625.5	3753.03	1204.74	2929.84	4263.89	0	6651.27	5194.81	3898.23
COBLL1	Non-matrisome	Non-matrisome	GO:CC not extracellular matrix	A0A287A580	A0A287A580	A0A287A580_PIG	0	0	0	2327.82	0	3022.18	3539.2	0	0	6652.4	0	0	6002.2	0	802.001	0	0	2451.29	0	0	0	1201.11	1302.31	1690.11	3189.2	0	0	5547.89	0	1523.71	0	0	1747.03	2066.46	0	1695.73	3251.54	0	0	0	0	0	0
COCH	Core matrisome	ECM Glycoproteins	GO:CC extracellular matrix (GO:0005576, GO:0005578 & GO:0031012) & GO:CC not extracellular matrix	I3LD22	I3LD22	I3LD22_PIG	0	0	0	0	0	0	3311.82	0	3826.75	5198.77	1868.03	2951.1	0	0	0	0	0	0	0	0	2627.29	0	0	0	0	0	5821.25	3592.8	0	922.485	0	0	0	0	0	0	0	0	0	0	0	0	0
COG1	Non-matrisome	Non-matrisome	GO:CC not extracellular matrix	A0A286ZIG9	A0A286ZIG9	A0A286ZIG9_PIG	0	0	0	0	0	0	0	0	0	0	2226.39	0	0	0	0	0	0	0	0	0	0	0	450.265	0	0	6893.01	0	3126.16	0	3135.27	0	0	0	1444.74	1719.9	0	1693.51	0	0	0	0	0	0
COG2	Non-matrisome	Non-matrisome	GO:CC not extracellular matrix	F1RG46	F1RG46	F1RG46_PIG	0	0	0	0	0	0	0	0	0	4154.8	3437.19	5035.03	0	0	0	0	0	0	0	1928.05	0	0	0	0	0	0	3225.01	7402.46	5924.48	1792.62	4704.85	0	0	783.562	0	681.454	0	0	0	0	0	0	0
COG3	Non-matrisome	Non-matrisome	GO:CC not extracellular matrix	A0A287AXJ1	A0A287AXJ1	A0A287AXJ1_PIG	0	1709.79	0	0	3325.18	1216.49	2450.35	4431.56	3397.27	2700.77	4450.2	5260.17	2966.12	0	827.655	0	0	0	0	2368.62	2557.27	0	888.871	676.512	0	5370.47	2092.02	3263.07	2950.05	2754.08	4897.01	1592.34	1277.11	3068.58	1388.09	1197.91	1434	1272.72	0	13592.2	0	0	0
COG4	Non-matrisome	Non-matrisome	GO:CC not extracellular matrix	A0A480V3B9	A0A480V3B9	A0A480V3B9_PIG	0	0	0	657.772	0	0	0	0	0	0	0	0	0	0	0	0	0	0	0	0	0	0	0	0	0	3621.96	0	2595.79	0	1200.1	2042.67	0	0	0	0	0	1019.93	0	0	0	0	0	0
COG6	Non-matrisome	Non-matrisome	GO:CC not extracellular matrix	F1RS21	F1RS21	F1RS21_PIG	0	0	0	509.207	788.281	0	1697.68	0	1885.37	1783.14	1311.16	1280.84	1108.92	0	0	0	0	0	1202.07	1647.48	740.929	629.515	756.333	0	608.908	5430.8	0	2529.45	2545.23	2662.07	0	0	0	473.703	0	594.379	791.33	0	495.604	0	0	408.93	0
COG7	Non-matrisome	Non-matrisome	GO:CC not extracellular matrix	F1SAB2	F1SAB2	F1SAB2_PIG	0	0	0	0	0	0	2737.37	7962.94	0	5586.54	7564.69	0	3471.68	0	0	0	0	0	0	0	0	0	0	0	0	0	0	0	0	7204.06	0	0	0	1370.33	689.82	0	761.766	0	0	0	0	0	0
COG8	Non-matrisome	Non-matrisome	GO:CC not extracellular matrix	A0A480PRS5	A0A480PRS5	A0A480PRS5_PIG	0	0	0	0	0	0	0	0	0	0	0	6624.36	0	0	0	0	0	0	0	2539.11	0	0	0	0	904.898	10342.1	0	6862.47	7876.98	2226.22	3132.95	0	1492.71	1968.65	1734.74	1559.1	1406.52	0	0	0	0	0	0
COIL	Non-matrisome	Non-matrisome	GO:CC not extracellular matrix	F1RSD6	F1RSD6	F1RSD6_PIG	0	0	0	0	0	368.131	1908.54	2372.97	2302.85	4075.36	2061.21	3760.17	1528.06	0	402.672	0	630.609	0	0	1697.32	0	1703.09	1129.04	978.788	1700.93	6179.75	0	5564.71	0	4394.84	0	1536.9	0	0	1801.39	1249.26	957.317	944.749	867.939	0	1347.25	0	0
COL11A1	Core matrisome	Collagens	GO:CC extracellular matrix (GO:0005576, GO:0005578 & GO:0031012) & GO:CC not extracellular matrix	A0A5G2RKA4	A0A5G2RKA4	A0A5G2RKA4_PIG	0	9837.23	0	3115.32	0	0	40265.1	25818.2	23223.5	35994	17772.2	68992.3	43855.2	0	0	0	0	0	0	38836	0	1123.82	0	3631.3	0	105227	71063.3	73019.1	76064.2	84568.2	139997	0	0	0	0	2682.6	0	60865.7	38500	157524	61607.2	44297.4	80044.6
COL11A2	Core matrisome	Collagens	GO:CC extracellular matrix (GO:0005576, GO:0005578 & GO:0031012) & GO:CC not extracellular matrix	K7GME7	K7GME7	K7GME7_PIG	0	0	0	0	0	0	0	6651.31	0	0	4765.97	0	0	0	0	0	0	0	0	3169.15	0	0	0	0	0	0	29085.5	0	0	8288.34	17194.5	0	0	0	0	0	0	0	2816.25	10096.7	6891.06	2940.88	5698.63
COL12A1	Core matrisome	Collagens	GO:CC extracellular matrix (GO:0005576, GO:0005578 & GO:0031012) & GO:CC not extracellular matrix	F1RQI0	F1RQI0	F1RQI0_PIG	0	855644	297989	256418	1206470	419698	2715540	3808920	4727190	6116460	5678190	2985720	1894610	0	9837.5	55633.5	22150.9	43495.7	7886.68	461610	547167	52758.3	80443.6	59714.2	26159	3635600	9147870	8879640	2966070	2309640	3746240	5051.96	3119.29	8258.69	8842.47	74241.7	4581	58476.7	59967.3	185622	62032.6	39884.1	104188
COL14A1	Core matrisome	Collagens	GO:CC extracellular matrix (GO:0005576, GO:0005578 & GO:0031012) & GO:CC not extracellular matrix	A0A480I6I0	A0A480I6I0	A0A480I6I0_PIG	0	773248	393599	426702	1972830	420787	2181060	2242380	1747530	3963900	2674670	1436100	2295320	0	152136	98538.7	615063	56809.8	303014	609638	282442	50212.4	102550	140364	56742.8	1861040	1953450	2536540	1116320	1719840	1907320	113317	95033.8	130967	98269	150110	114129	55486.2	47964.9	86477.8	58109.1	37052.2	60614.5
COL15A1	Core matrisome	Collagens	GO:CC extracellular matrix (GO:0005576, GO:0005578 & GO:0031012) & GO:CC not extracellular matrix	F1SSE8	F1SSE8	F1SSE8_PIG	0	18968.2	13117.8	14862.6	15717.7	12105.5	17611	18897.9	36837.3	36196.4	28212.4	24695.6	21870.9	0	19200.5	55336.1	14166.1	7488.45	9613.17	38961	27887.7	21275.5	20630.2	18990.1	18921.5	56067.7	75165.3	70592.1	31777.1	57768.6	51204.3	18310	16791	18792.9	18747	16448.4	20669.4	55689.6	47799.2	61730.1	41038.4	24604.7	18967.3
COL16A1	Core matrisome	Collagens	GO:CC extracellular matrix (GO:0005576, GO:0005578 & GO:0031012) & GO:CC not extracellular matrix	A0A5G2QW73	A0A5G2QW73	A0A5G2QW73_PIG	0	0	0	0	0	0	2152.89	3739.37	4766.42	5645.49	4727.6	0	5151.71	0	0	0	0	0	0	0	0	0	0	0	0	0	10514.9	0	0	3021.55	0	0	0	0	0	0	0	0	0	0	0	0	0
COL18A1	Core matrisome	Collagens	GO:CC extracellular matrix (GO:0005576, GO:0005578 & GO:0031012) & GO:CC not extracellular matrix	A0A286ZIL9	A0A286ZIL9	A0A286ZIL9_PIG	0	13547.7	13451.3	13651.8	19849.1	10207.4	32604.1	27882	30483.4	37896.2	38042.8	35905.8	41204.2	0	8692.54	41993	13529.1	5757.44	8502.47	41542.7	33015.6	13115	14777.5	14682.7	13030.8	77114.2	55700.6	86661.2	58355.2	41655.4	90499.8	13292.5	10924.2	11073.8	18486.8	9603.36	16155.2	14130.7	10934.5	11464.9	9016.49	10310.3	8373.12
COL1A1	Core matrisome	Collagens	GO:CC extracellular matrix (GO:0005576, GO:0005578 & GO:0031012) & GO:CC not extracellular matrix	A0A287A1S6	A0A287A1S6	A0A287A1S6_PIG	0	1111230	1233810	903203	2179480	743703	3776930	6253740	4739800	6269230	4878160	6873620	3946450	52390400	460772	1949200	830496	490929	412947	2325880	3316420	387993	547342	682878	533831	5672010	12368100	8599660	9438040	3316080	10121800	898529	737662	1247470	748289	452896	597886	2723370	2133970	9228640	3509480	1972400	3595490
COL1A2	Core matrisome	Collagens	GO:CC extracellular matrix (GO:0005576, GO:0005578 & GO:0031012) & GO:CC not extracellular matrix	F1SFA7	F1SFA7	F1SFA7_PIG	0	2086500	1353870	1067390	3213240	1089290	6687750	10384200	9813540	12244700	10487800	6711410	7789730	45471100	288818	1187600	638499	371629	351721	4097490	4257720	426212	909272	784620	396410	12453100	21174600	18045600	11789400	6300680	21541500	514890	661675	1135360	890178	318032	757464	9943060	5289580	23334400	13318400	5619510	10463700
COL21A1	Core matrisome	Collagens	GO:CC extracellular matrix (GO:0005576, GO:0005578 & GO:0031012) & GO:CC not extracellular matrix	F1RZU6	F1RZU6	F1RZU6_PIG	0	4644.88	0	7815.87	2996.3	2135.84	3379.41	7877.56	6083.73	7838.47	8974.32	15534.3	17080.6	0	1064.72	0	5665.86	810.001	3576.14	3979.49	3894.48	0	0	3917.47	1347.81	18436.3	27038	17345.6	0	2084.71	4937.83	2904.36	3478.32	9847.96	3634.46	2940.8	7577.06	5391.35	6501.78	15881.9	10587.2	6849.42	5638.94
COL22A1	Core matrisome	Collagens	GO:CC extracellular matrix (GO:0005576, GO:0005578 & GO:0031012) & GO:CC not extracellular matrix	F1RSI7	F1RSI7	F1RSI7_PIG	0	0	0	0	0	0	0	0	0	0	0	0	0	0	0	0	0	0	0	1915.66	0	0	812.669	0	0	0	0	0	0	0	0	0	0	0	0	1262.31	0	2310.82	2086.22	6518.86	7730.39	2583.06	3256.22
COL28A1	Core matrisome	Collagens	GO:CC extracellular matrix (GO:0005576, GO:0005578 & GO:0031012) & GO:CC not extracellular matrix	A0A287BG85	A0A287BG85	A0A287BG85_PIG	0	0	0	0	0	0	0	0	0	0	0	0	0	0	0	0	0	0	0	0	0	0	0	0	0	0	0	0	0	0	0	0	0	0	0	0	0	0	0	0	0	0	0
COL2A1	Core matrisome	Collagens	GO:CC extracellular matrix (GO:0005576, GO:0005578 & GO:0031012) & GO:CC not extracellular matrix	A0A287A2Q7	A0A287A2Q7	A0A287A2Q7_PIG	0	2178.4	0	0	1779.64	784.471	5508.06	9339.36	13789.1	13111.6	6962.65	9884.22	5744.95	0	0	0	0	0	0	5109.92	0	0	1096.38	0	0	8431.74	48494.8	19247.7	10418.2	9811.72	28236.3	0	0	0	0	0	0	12000.4	7957.72	44322.5	16446.6	7228.28	11611.2
COL3A1	Core matrisome	Collagens	GO:CC extracellular matrix (GO:0005576, GO:0005578 & GO:0031012) & GO:CC not extracellular matrix	A0A286ZQ85	A0A286ZQ85	A0A286ZQ85_PIG	0	3399.94	4984.52	5096.83	11680.4	4668.32	12878.8	11806.8	14314.7	18064.1	10561.5	15525.1	26191.5	0	1863.02	20282.8	3644.24	4085.52	5364.02	8475.23	34670.3	2148.91	2703.24	2323.87	1294.91	27429.5	29072.5	22643.8	28623.8	9593.69	16405.1	1426.56	3296.28	6266.56	2800.12	3830.21	2997.92	9051.96	9991.08	42817.1	99914.1	10229.2	57277.5
COL4A1	Core matrisome	Collagens	GO:CC extracellular matrix (GO:0005576, GO:0005578 & GO:0031012) & GO:CC not extracellular matrix	A0A8W4FCC2	A0A8W4FCC2	A0A8W4FCC2_PIG	0	818.55	2351.45	16068.3	1323.86	6266.87	11538	16936.9	7073.27	25190	57467.1	22660.5	23829.8	0	612.979	0	3443.66	10063.1	5363.8	22403.7	54385.6	5616.45	3757.27	24736.6	37888.3	14960.4	256667	48715.2	59123.2	7921.93	58497.4	38409.1	25659.9	32197.8	14245.2	19302.8	19805.6	87434.3	47659.7	416076	226624	177935	43117.8
COL4A2	Core matrisome	Collagens	GO:CC extracellular matrix (GO:0005576, GO:0005578 & GO:0031012) & GO:CC not extracellular matrix	F1RLL9	F1RLL9	F1RLL9_PIG	0	4036.11	2849.11	9967.89	3846.15	3330.73	3967.08	4831.69	5321.57	6985.2	8736.72	5124.28	8043.89	0	2513.88	0	2907.71	3763.96	3391.24	11167	12105.3	4029.09	2570.53	12288.4	11461.5	0	31824.8	12833.8	9198.61	5654.1	10854.7	17091.8	20337.7	26609.3	8391.97	17045.8	12981.7	71172.7	62395.4	205588	155389	121188	31715.9
COL4A6	Core matrisome	Collagens	GO:CC extracellular matrix (GO:0005576, GO:0005578 & GO:0031012) & GO:CC not extracellular matrix	A0A8W4FGE1	A0A8W4FGE1	A0A8W4FGE1_PIG	0	0	0	0	0	0	6366.01	17779.9	6226.09	8747.02	14089.1	0	9501.88	0	0	0	0	0	0	5435.36	5215.71	0	0	0	0	10001.1	23098.4	18833.9	10715.1	3397.83	10813.4	5595.09	0	4656.21	1460.95	0	1252.58	12179.1	8326.05	29798.6	14552.2	17802.6	11424.9
COL5A1	Core matrisome	Collagens	GO:CC extracellular matrix (GO:0005576, GO:0005578 & GO:0031012) & GO:CC not extracellular matrix	F1S021	F1S021	F1S021_PIG	0	42661.6	49202.9	45397.6	115566	36578.1	129613	95322.7	87432.6	147223	123577	88199.9	179836	0	26878.3	8178.06	50364.5	23182.9	28690	224238	160194	33045.3	43573.9	72238	36716.4	313171	196626	229551	215237	339583	329914	28135.7	61505.5	63881.1	54799	28555.7	62847	361826	296582	611474	382000	297044	355474
COL5A2	Core matrisome	Collagens	GO:CC extracellular matrix (GO:0005576, GO:0005578 & GO:0031012) & GO:CC not extracellular matrix	Q59IP2	Q59IP2	Q59IP2_PIG	0	5004.76	4750.48	3262.82	6648.86	2249.89	7995.92	10530.8	15334.1	16996.9	13169.4	10211.4	12506.5	302281	1186.39	0	2093.22	0	0	12085.6	10857.5	3051.59	3587.52	2465.04	4470.75	21732.4	35974.3	31468	31606.1	12997.7	54050.5	2094.62	4304.76	3036.51	8444.74	1583.52	4098.53	34105.1	8121.19	58475.9	29717.6	11549.2	24996.3
COL6A1	Core matrisome	Collagens	GO:CC extracellular matrix (GO:0005576, GO:0005578 & GO:0031012) & GO:CC not extracellular matrix	I3LS72	I3LS72	I3LS72_PIG	0	995879	682066	522780	2204340	550207	3175690	6678500	5953620	6231140	7772580	3487410	3374650	81381300	220035	169329	325301	238188	186291	2240910	2546740	355978	457576	378101	325213	8251110	20094200	14031100	13026200	5889820	11768700	502814	349461	657732	679423	679646	432583	857696	641836	689803	730144	845444	509449
COL6A2	Core matrisome	Collagens	GO:CC extracellular matrix (GO:0005576, GO:0005578 & GO:0031012) & GO:CC not extracellular matrix	I3LQ84	I3LQ84	I3LQ84_PIG	0	798078	414821	391182	1652620	465869	2059450	4989860	3671130	4203170	5269680	2304550	2219160	48669000	172723	154385	232941	153066	152148	1513400	1885170	270669	320573	281255	238234	5551530	14082000	9936640	7047070	4061680	6645440	285434	244632	639908	448246	599727	352647	1909660	2084640	7016970	4802840	3235620	1865430
COL6A3	Core matrisome	Collagens	GO:CC extracellular matrix (GO:0005576, GO:0005578 & GO:0031012) & GO:CC not extracellular matrix	A0A286ZVG7	A0A286ZVG7	A0A286ZVG7_PIG	0	1111450	653344	693412	2150230	798376	3338050	7164670	6007630	8545280	8373020	4152790	3887190	0	241354	312209	387771	284798	291697	2204800	2369310	501073	533539	516786	419005	8008450	21035100	16443000	9380280	5759070	11005200	448464	397650	827600	656092	841006	579627	438726	562435	640126	541383	524686	481601
COL6A5	Core matrisome	Collagens	GO:CC extracellular matrix (GO:0005576, GO:0005578 & GO:0031012) & GO:CC not extracellular matrix	A0A287BK35	A0A287BK35	A0A287BK35_PIG	0	4963.29	3739.04	5886.47	18899.6	4048.79	27321.1	18399.3	21835.6	19585	24663.2	20753.9	33572.1	0	2030.64	0	4362.37	0	1247.44	11621.7	13384.4	6288.34	4282.22	3423.13	3207.92	27015.7	37190.2	70460.3	27134.9	23868.6	56670.1	3158.84	4116.93	12161.6	4634.67	7970.25	5744.07	8196.54	3371.93	19615.6	8130.85	7477.22	7547.98
COL6A6	Core matrisome	Collagens	GO:CC extracellular matrix (GO:0005576, GO:0005578 & GO:0031012) & GO:CC not extracellular matrix	A0A5G2R0Y2	A0A5G2R0Y2	A0A5G2R0Y2_PIG	0	31524.6	23661.9	28496.5	102196	24168.6	80928.6	91417	102389	124130	114159	92467	146016	0	18850.7	50221.4	24596.6	16001.8	18744.7	84607	86105	26480.6	23849.8	26821	31594.6	117712	392836	376701	217897	108874	283865	28424.9	45143	76470.1	39231.7	48657.4	41287.6	28819.9	34844.7	71105.3	35732.5	32985.2	44451
COL8A1	Core matrisome	Collagens	GO:CC extracellular matrix (GO:0005576, GO:0005578 & GO:0031012) & GO:CC not extracellular matrix	A0A8D0VZ59	A0A8D0VZ59	A0A8D0VZ59_PIG	0	0	0	0	2440.5	0	6619.83	11810.9	9155.28	21518.4	17743.7	8226.17	14705.9	0	0	0	0	0	0	6404.24	26774.4	0	1160.44	1372	2558.8	37042.7	108610	39940.3	35895	36010.9	46288.6	6174.05	2283.53	2239.36	0	1524.07	0	38337.5	19332.9	240119	106468	44610.9	91109.9
COL8A2	Core matrisome	Collagens	GO:CC extracellular matrix (GO:0005576, GO:0005578 & GO:0031012) & GO:CC not extracellular matrix	A0A287AHD4	A0A287AHD4	A0A287AHD4_PIG	0	0	0	0	0	0	0	0	0	0	0	0	0	0	0	0	0	0	0	0	0	0	0	0	0	0	10285.8	0	0	0	0	0	0	0	0	0	0	1232.65	0	8457.17	0	0	0
COLEC12	Matrisome-associated	ECM-affiliated Proteins	GO:CC not extracellular matrix	K9J4M9	K9J4M9	K9J4M9_PIG	0	1679.59	0	1392.24	3808.4	1685.92	5139.35	4668.32	5774.76	8010.63	6457.58	0	5711.25	0	1172.02	0	1883.54	0	0	2057.46	0	0	0	0	0	6753.05	11094.9	11730.4	7493.58	6472.26	7611.23	1480.32	0	1497.06	0	1024.14	0	5171.22	1231.09	4062.96	3361	1451.09	0
COLGALT1	Non-matrisome	Non-matrisome	GO:CC not extracellular matrix	A0A287AXP9	A0A287AXP9	A0A287AXP9_PIG	0	4994.41	5175.64	5114.3	7491.66	5609.22	11258.8	4827.99	9525.3	18655	11038.1	11926.1	11977.6	0	3460.68	0	5241.21	3899.87	3169.26	10337.4	9244.58	6529.22	3996.89	6169.6	5184.19	22235.3	0	13952.6	7469.5	23299.1	5768.73	3122.98	3817.16	5212.07	7017.19	5428.71	7734.33	3298.12	2739.64	0	2834.44	3298.04	2881.52
COLGALT2	Non-matrisome	Non-matrisome	GO:CC not extracellular matrix	A0A287BTA9	A0A287BTA9	A0A287BTA9_PIG	0	0	0	0	1356.83	0	3104.5	0	1551.18	3546.5	2196.07	2267.42	1547.37	0	0	0	0	0	0	0	0	590.327	0	0	718.055	0	0	4999.42	0	1254.5	3470.18	0	0	0	0	0	0	0	0	0	0	0	0
COMMD1	Non-matrisome	Non-matrisome	GO:CC not extracellular matrix	A0A287AYP3	A0A287AYP3	A0A287AYP3_PIG	0	1654.92	0	0	0	501.503	0	2187.76	2045.9	2457.05	1435.76	3947.39	1978.3	0	994.862	0	0	910.657	0	2179.81	2729.76	0	1252.31	1597.25	1231.28	3138.8	0	1786.13	0	2570.19	679.539	0	656.579	0	1713.85	1140.63	0	0	0	0	0	0	663.94
COMMD10	Non-matrisome	Non-matrisome	GO:CC not extracellular matrix	A0A287AYH8	A0A287AYH8	A0A287AYH8_PIG	0	1241.12	0	1895.15	2201.27	1177.17	0	0	0	2794.68	3324.38	0	3355.74	0	1311.33	0	2343.37	0	1434.26	3201.66	0	1880.55	2820.32	2949.88	2364.52	3644.59	0	6224.61	0	7889.01	0	0	1361.82	1020.46	3531.55	1354.78	0	0	0	0	0	0	0
COMMD2	Non-matrisome	Non-matrisome	GO:CC not extracellular matrix	A0A4X1T034	A0A4X1T034	A0A4X1T034_PIG	0	1781.66	0	1781.78	1664.88	696.556	3176	0	2626.25	0	0	3049.52	2500.04	0	2334.96	0	816.4	890.194	0	2474.33	6768.24	2379.24	1860.64	4055.23	4611.05	9079.59	0	8047.43	4890.84	10572.3	6294.27	0	2100.19	0	3985.02	728.47	1717.02	0	578.138	0	0	1124.37	0
COMMD3	Non-matrisome	Non-matrisome	GO:CC extracellular matrix (GO:0005576, GO:0005578 & GO:0031012) & GO:CC not extracellular matrix	A0A4X1TSS3	A0A4X1TSS3	A0A4X1TSS3_PIG	0	3281.43	2635.81	3158.11	4459.73	2586.09	4938.76	4834.7	4936.52	2961.21	5916.85	6996.27	6465.77	0	1542.38	0	2032.92	1981.81	2217.45	3985.07	4813.97	3094.42	3325.25	3816.38	2331.31	18113.7	5585.29	13393.6	6283.77	7881.79	6439.2	2216.36	1991.09	2077.78	4031.26	2469.47	1915.93	3028.41	2183.29	3874.15	3311.08	2295.62	2113.15
COMMD4	Non-matrisome	Non-matrisome	GO:CC not extracellular matrix	A0A8W4FNB9	A0A8W4FNB9	A0A8W4FNB9_PIG	0	530.741	0	0	1317.46	0	0	3980.16	2312.17	1357.53	4071.87	5429.84	572.369	0	1321.16	0	745.045	0	0	1549.27	693.999	0	859.282	1270.92	0	3167.09	7038.37	3766.14	3260.55	6820.74	3191.79	0	711.652	0	824.918	624.349	0	0	514.012	0	0	752.796	0
COMMD5	Non-matrisome	Non-matrisome	GO:CC not extracellular matrix	A0A4X1UP09	A0A4X1UP09	A0A4X1UP09_PIG	0	0	0	0	2266.45	805.317	3334.78	0	0	3506.95	3195.91	0	0	0	971.035	0	0	0	0	1386.25	0	0	878.703	0	1302.85	0	0	0	0	4173.17	0	0	1247.57	0	0	0	0	0	0	0	0	0	0
COMMD7	Non-matrisome	Non-matrisome	GO:CC not extracellular matrix	A0A287B1U5	A0A287B1U5	A0A287B1U5_PIG	0	1656.81	0	0	2010.89	1129.64	0	0	0	4771.13	3348.47	2963.38	0	0	694.838	0	0	0	0	0	0	833.646	0	1801.28	1804.45	0	0	0	0	3839.14	0	0	0	0	0	1311.13	0	0	0	0	0	0	0
COMMD8	Non-matrisome	Non-matrisome	GO:CC not extracellular matrix	A0A480XDE4	A0A480XDE4	A0A480XDE4_PIG	0	2525.85	1974.09	1445.12	1919.47	1922.31	3861.5	0	4756.32	2567.38	2470.62	4774.99	3953.13	0	813.883	0	526.866	1929.62	1766.28	1732.69	2318.68	994.233	1738.9	2750.21	1875.47	0	0	0	0	4359.24	0	0	1891.92	1207.38	1893.37	1025.13	2013.84	0	0	0	0	0	0
COMMD9	Non-matrisome	Non-matrisome	GO:CC extracellular matrix (GO:0005576, GO:0005578 & GO:0031012) & GO:CC not extracellular matrix	A0A5G2QQT4	A0A5G2QQT4	A0A5G2QQT4_PIG	0	1329.13	0	0	2219.05	1107.24	5609.85	0	0	2333.09	3987.93	0	4312.34	0	1275.07	0	1407.45	0	1206.58	1891.29	0	0	1331.48	1701.89	1219.7	3367.4	0	0	0	5104.45	0	0	0	1192.82	1210.83	1136.3	0	0	0	0	0	0	0
COMT^	Non-matrisome	Non-matrisome	GO:CC not extracellular matrix	Q99028	Q99028;F1RHN3	COMT_PIG	0	30052	65980.7	42657.7	41355	43835.8	67867.1	20245.9	28602.9	21039.1	24212.8	39477.8	39302.2	0	27483.5	0	45283.2	58714.7	58537.3	18588	27350.3	9138.36	13750.4	16221	15897.1	25537.2	6601.68	28498.3	16924.3	13916.9	18952.1	19495.3	25855.9	33666.6	14338.9	27150.1	20250.7	18643.1	24028.7	12352.4	18037.5	25500.9	31586.3
COMTD1	Non-matrisome	Non-matrisome	GO:CC not extracellular matrix	A0A287A5M5	A0A287A5M5	A0A287A5M5_PIG	0	20784.9	17971.3	17333.3	26024.4	23380	23702.7	21524	20998.8	23596.7	24348.4	47646.9	26701	0	21524.5	0	14724.1	23183	19323	25901.5	24633.9	22711.6	32458.8	16650.1	22270.5	41098	29056.2	73518.7	29245.4	11463.1	74820.9	28613.7	28050.5	19797.8	35323.6	20086.6	37518	62061.8	35248.9	71162.4	71211.6	52814.3	65254.3
COPA	Non-matrisome	Non-matrisome	GO:CC not extracellular matrix	F1RJX8	F1RJX8	F1RJX8_PIG	0	9447.08	6214.92	9170.8	16324.8	5850.34	22257.7	40815.7	33025.2	40979.6	51585.2	32942.9	31702.8	0	2930.77	0	3882.37	4160.13	4414.56	19693.4	15584.9	4468.9	7795.5	4610.31	5538.16	53980.6	51829.7	73601.7	70348.7	77136.2	74127.6	10559.5	9152.16	13258.6	10167.3	12176.9	8866.91	11516.9	8128.63	15394.1	15242.3	11221.2	12394.4
COPB1^	Non-matrisome	Non-matrisome	GO:CC not extracellular matrix	F1S982	F1S982	F1S982_PIG	0	1630.12	0	2081.4	2307.25	2096.46	0	3641.85	0	8064.42	5862.93	6489.14	0	0	995.839	0	0	0	0	2862.56	0	2632.02	2647.41	0	0	0	7011.43	11667.6	0	8647.71	11451.8	0	0	2377.71	0	2644.44	3112.07	0	0	0	0	1323.87	0
COPB1°	Non-matrisome	Non-matrisome	GO:CC not extracellular matrix	D2SW95	D2SW95;F1S982	COPB_PIG	0	11083.2	11164.8	12437.6	20147.3	7673.35	40361.4	28195	35111.4	35550.7	52617.1	35031.8	35473.1	0	3578.06	21583.2	3327.67	5482.7	4833.73	22736.7	26983.3	3887.12	8470.49	4284.06	9086.8	84588.5	54559.4	98158	73782.1	77594.5	64581.9	12776.1	10306	16490.2	10535.1	11786.7	11533.2	15063.3	8720.17	13041.1	14931.5	10831.1	12862.7
COPB2	Non-matrisome	Non-matrisome	GO:CC not extracellular matrix	A0A286ZPT0	A0A286ZPT0	A0A286ZPT0_PIG	0	11794.1	8286.61	10833.8	16193.8	6280.32	24826.1	27803.7	25413.2	40591.7	36424	24108.7	26525.1	0	2756.48	18653.5	5586.18	3741.05	5719.18	10198.7	24477.7	5007.11	5892.98	5741.08	6333.39	32459.8	24578.4	40545.5	31820	42377.7	35509.3	6716.75	6925.85	8814.21	6986.59	8639.68	8316.83	6407.12	4255.66	6844.33	6801.55	6142.02	7338.42
COPE	Non-matrisome	Non-matrisome	GO:CC not extracellular matrix	F1S7E1	F1S7E1	F1S7E1_PIG	0	4857.28	2524.29	3655.88	7583.58	3298.12	12369.6	5848.17	7368.3	14713.7	8290.6	12126.9	8135.74	0	1635.23	0	2942.33	1820.94	1491.35	6654.02	6029.84	4134.83	3104.17	5180.78	3736.57	9034.3	0	11138.5	0	14972.9	4980.85	2017.18	3035.38	2860.66	5026.56	3463.84	3337.57	1961.4	1448.59	0	1675.04	1528.35	1619.11
COPG1	Non-matrisome	Non-matrisome	GO:CC not extracellular matrix	A0A5G2QNM8	A0A5G2QNM8	A0A5G2QNM8_PIG	0	2365.43	1768.09	2755.88	4238.19	2028.16	4570.51	8281.06	7731.83	11034.1	15566.6	11089.5	7536.9	0	1352.6	0	1325.96	2119.67	1967.8	4209.09	3716.79	1470.36	1843.76	2308.99	2462.36	17813.9	14677.6	17513.6	19888.4	20508.8	16941	3434.65	2426.9	2389.96	2560.36	2445.66	3194.92	5909.92	1780.31	3237.65	3651.68	2154.64	2611.12
COPG2	Non-matrisome	Non-matrisome	GO:CC not extracellular matrix	F1SNE9	F1SNE9	F1SNE9_PIG	0	0	0	0	0	0	0	0	0	0	3354.35	0	934.821	0	354.94	0	0	0	0	1149.33	0	0	680.353	0	0	4055.79	4713.06	2786.75	0	5280.15	0	0	532.39	1083.08	1023.85	962.089	946.184	0	0	0	0	546.005	0
COPS2	Non-matrisome	Non-matrisome	GO:CC not extracellular matrix	A0A5K1ULP5	A0A5K1ULP5	A0A5K1ULP5_PIG	0	7017.13	9454.05	8131.06	8701.21	6589.38	10925.2	7749.54	7365.02	8167.52	9563.16	8767.03	5424.02	0	5912.35	0	9677.56	5860.41	6690.37	5941.28	10838.5	6104.02	5932.29	6878.4	4991.87	7682.55	0	8955.64	8819.94	10566.6	6149.26	6620.59	5495.43	7750	6630.64	6200.03	7930.83	8925.15	5408.95	6971.37	8771.59	6228.79	6368.32
COPS3	Non-matrisome	Non-matrisome	GO:CC not extracellular matrix	A0A287ABP7	A0A287ABP7	A0A287ABP7_PIG	0	4933.87	4150.58	5030.23	5357.13	4676.21	5538.8	4881.45	4389.03	2725.84	3774.96	6811.89	2877.09	0	6805.88	0	6639.62	4765.85	5312.47	5876.52	5115.81	3946.81	4291.48	6331.73	4485.02	25899.5	4932.58	12567	0	6986.46	0	3893.95	3760.84	5235.92	6345.87	4492.02	3388.51	3080.68	2638.19	0	2147.36	3397.65	3101.8
COPS4	Non-matrisome	Non-matrisome	GO:CC not extracellular matrix	A7Y521	A7Y521	CSN4_PIG	0	5688.53	4930.98	6003.33	5226.71	5161.75	5772.93	4418.88	4094.19	3769.71	5256.65	8694.28	3037.11	0	6352.56	9673.42	6348.36	5167.93	5960.82	6070.09	5346.06	5719.73	4690.87	6050.97	5861.65	6667.67	3408.31	5070.85	0	6166.2	2247.84	3911.55	3891.42	5854.87	5113.44	5105.45	4504.92	4359.72	3634.82	4143.01	3136.13	2978.51	4366.65
COPS5	Non-matrisome	Non-matrisome	GO:CC not extracellular matrix	A0A287A976	A0A287A976	A0A287A976_PIG	0	3464.75	3782.48	4737.45	4336.59	3531.78	3067.48	3092.62	2550.85	3868.41	4778.54	0	2820.82	0	3687.78	6354.29	5892.49	3985.29	4162.57	5415.51	4475.78	4689.72	3728.44	6718.41	5327.82	7560.2	0	5846.47	11532.5	6699.17	4897.56	2704.08	3126.44	5266	4753.38	3411.63	3758.33	4522.91	2127.9	0	2203.72	2683.88	3214.98
COPS6	Non-matrisome	Non-matrisome	GO:CC not extracellular matrix	A7TX81	A0A287AB66;A7TX81	CSN6_PIG	0	1928.41	2378.94	2537.17	2253.86	1621.98	1778.11	0	2886	3224.59	0	3117.12	0	0	2227.93	0	2245.68	2054.42	1741.28	3032.68	7180.26	2483.73	1854.92	3905.61	2981.88	0	0	1139.89	0	5359.64	0	1543.87	2197.39	1880.32	2653.82	1933.29	1937.02	915.535	1828.81	0	1526.92	1430.37	0
COPS7A	Non-matrisome	Non-matrisome	GO:CC not extracellular matrix	A0A8W4FDR1	A0A8W4FDR1	A0A8W4FDR1_PIG	0	4569.31	6166.5	6369.53	5842.81	4859.35	4269.39	3108.62	5084.88	3967.81	6366.54	4145.32	3927.33	0	5635.1	0	7704.52	3772.37	4375.88	8832.47	10513.5	7676.28	6598.2	7340.97	7867.19	7348.17	8530.31	8347.14	5842.67	7297.17	4443.04	3512.82	4449.01	4688.8	5350	3510.22	4069.73	3125.73	3380.39	4567.51	4012.15	3977.5	2971.49
COPS7B	Non-matrisome	Non-matrisome	GO:CC not extracellular matrix	A0A287A9J3	A0A287A9J3	A0A287A9J3_PIG	0	2466.63	3022.61	8444.01	3020.38	4181.32	5663.63	3602.75	4016.32	5607.91	3102.05	7714.86	4091.06	0	3091.03	0	4358.81	3830.05	6483.37	3610.5	8275.03	4811.26	3054.06	5168.75	5346.17	11273.5	0	15809.9	3902.46	5210.49	4451.97	3364.22	4219.09	6124.28	3228.18	5087.77	5059.3	2321.09	2076.67	0	1929.05	3265.49	3691.37
COPS8	Non-matrisome	Non-matrisome	GO:CC not extracellular matrix	A0A8D0U0L0	A0A8D0U0L0	A0A8D0U0L0_PIG	0	2913.38	4573.5	4956.04	3467.21	3624.63	3550.05	3537.35	5083.94	3784.18	6681.4	3590.24	3307.65	0	4607.16	9686.98	5089.57	3706.32	5133.07	7834.67	7329.42	5946.05	5542.9	7635.39	7287.25	6587.82	0	5131.13	4709.89	6108.52	6168.41	3903.43	3724.49	5291.87	9503.12	4506.61	5712.27	0	2376.57	0	0	2851.56	0
COPZ1	Non-matrisome	Non-matrisome	GO:CC not extracellular matrix	A0A5G2QVD5	A0A5G2QVD5	A0A5G2QVD5_PIG	0	2775.15	0	2792.51	4089.86	1964.03	3875.82	2545.33	4032.69	4653.81	3991.73	4486.68	3429.22	0	1560.59	0	2769.04	1728.57	2800.01	2272.3	0	1132.11	1134.96	2343.85	1119.22	0	0	0	0	4156.2	4480.18	966.012	1573.56	1362.86	2429.15	1866.83	0	2394	1532.69	0	0	1569.25	1834.43
COPZ2	Non-matrisome	Non-matrisome	GO:CC not extracellular matrix	A0A481CG38	A0A481CG38	A0A481CG38_PIG	0	1324.43	0	1505.17	2836.03	1417.07	3942.05	2815.55	2674.71	6109.11	6940.8	5971.04	3896.92	0	1009.48	0	1189.23	0	0	0	0	0	0	0	0	5247.18	4794.51	0	0	3396.08	0	0	0	0	0	0	0	0	0	0	0	0	0
COQ10A	Non-matrisome	Non-matrisome	GO:CC not extracellular matrix	F1SLZ5	F1SLZ5	F1SLZ5_PIG	0	16193.9	21039	16393.1	4140.01	13879.6	13902.6	0	4591.52	0	0	5461.46	4693.25	0	18932	25224.4	20260	16355.2	13182.3	17561.9	21311.5	31977.4	28843.5	23057.4	33263	0	0	0	0	1507.64	11747.8	20945.9	27273.5	22449.2	22927	21244.1	33700.2	21999.9	21013.5	35917.6	29213.4	34899.8	41701.7
COQ10B	Non-matrisome	Non-matrisome	GO:CC not extracellular matrix	A0A8D1P741	A0A8D1P741	A0A8D1P741_PIG	0	0	0	1576.67	929.364	1132.07	1954.53	0	0	0	0	0	0	0	395.999	0	626.008	838.752	1008.96	1607.66	2336.99	998.02	876.472	1643.8	1504.12	2877.17	0	0	0	537.286	0	1894.87	0	1194.79	1308.08	0	1610.78	2060.96	1699.05	0	861.32	1214.51	2941.97
COQ3	Non-matrisome	Non-matrisome	GO:CC not extracellular matrix	A0A287B6T3	A0A287B6T3	A0A287B6T3_PIG	0	7614.58	5902.21	7101.71	3906.32	7923.15	4626.76	0	0	2048.93	0	11458.5	2306.94	0	8647.8	18079.5	8537.84	7435.17	7764.3	6437.02	8064.49	6468.54	6893.06	9532.62	8728.65	0	0	0	0	2822.43	8709.05	6952.3	8657.96	6392.38	7276.73	8316.61	7641.44	5045.57	3430.85	11492	9828.58	7438.53	6073.46
COQ4	Non-matrisome	Non-matrisome	GO:CC not extracellular matrix	F1RR97	F1RR97	F1RR97_PIG	0	3242.56	3768.62	1419.07	987.676	2841.5	4945.42	0	0	0	0	0	3195.88	0	3149.04	0	2253.12	1884.09	3710.34	3241.65	4222.34	2862.77	3638.13	2799.5	4247.2	0	0	0	1268.74	0	0	3668.19	3576.59	2274.2	4084.82	1951.27	4966.11	3303.24	2339.74	0	3833.31	2091.93	3429.69
COQ5	Non-matrisome	Non-matrisome	GO:CC not extracellular matrix	F1RJK0	F1RJK0	F1RJK0_PIG	0	12392.7	10110.9	8411.39	6050.41	9895.67	5925.4	0	4011.43	4056.36	7917.59	7029.65	4776	0	9357.76	17094.8	11811.1	9019.85	11045.3	13479.7	11582.5	14806.3	18388.2	11977.5	19395.9	0	0	0	0	3849.56	6516.5	12849.5	11387.7	9091.35	18945.8	9477.65	16124.1	10978.2	10943.9	7169.05	11564.7	9687.18	13101.1
COQ6	Non-matrisome	Non-matrisome	GO:CC not extracellular matrix	F1S3H4	F1S3H4	F1S3H4_PIG	0	17158.5	16740.3	9855.74	6863.89	17324.5	5913.88	3753.73	4390.46	2451.87	1878.67	3748.56	5705.58	0	10723.8	0	13560.5	14028.4	15652.7	21154	14358.9	26965.4	27259.5	22080.6	20129	0	0	0	7398.51	3278.67	1939.55	14194.5	15009.5	14663.7	23365.9	16399.6	22098	11701.6	17041.3	9373.92	12431.7	15608.3	14072.6
COQ7	Non-matrisome	Non-matrisome	GO:CC not extracellular matrix	A0A287A0B5	A0A287A0B5	A0A287A0B5_PIG	0	22511.8	13397	15061.6	10124.8	15603	7977.74	6817	8131.41	8601.68	0	6117.67	3791.04	0	25635	0	19107.9	13151.3	15906.9	27173.7	15121.7	30225.2	32625.6	26770.7	29707.8	0	12651.7	2314.72	4887.54	4847.35	7832.11	19746.7	19808.2	17029.7	33868.1	21502	27864.8	12850.2	13871.6	8659.12	16169.4	16932.2	15469.1
COQ8A	Non-matrisome	Non-matrisome	GO:CC not extracellular matrix	A0A5G2R212	A0A5G2R212	A0A5G2R212_PIG	0	30128.1	26953.3	31697.2	11539.9	46769.4	20275.7	9032.86	8414.94	2434.32	4916.88	21398.3	13751.9	0	45082.5	20303.7	25993.9	33534.2	28548.7	44036.5	37674.7	40620.4	65891.6	26822.3	49299.7	11793.9	13227.6	8517.06	22610.7	5923.4	18209.7	63467.6	60012.6	53639.7	43420.9	50499.1	62431.9	95025.9	54063.5	79184.6	91788.7	56800.3	63314.6
COQ9	Non-matrisome	Non-matrisome	GO:CC not extracellular matrix	A0A8D0XY59	A0A8D0XY59	A0A8D0XY59_PIG	0	27782.2	39306.6	24849.8	15972.9	43154.4	15327.5	5586.6	8882.41	1498.34	0	9107.99	5920.52	13257000	23447	13006.2	64952	50205.6	38428.3	18139.7	49540.6	27333.9	50357.8	43048.1	29048.4	0	0	0	17804.2	3631.01	5293.99	31116.2	18989.1	22167.4	83352.9	27599.7	74935.9	9371.91	10235.8	14629.8	15692.6	7511.38	12300.1
CORO1A	Non-matrisome	Non-matrisome	GO:CC not extracellular matrix	A0A287BDS7	A0A287BDS7	A0A287BDS7_PIG	0	0	0	1709.02	0	2679.08	0	0	0	0	0	0	0	0	583.994	0	0	4176.32	1836.66	0	0	0	0	0	0	0	0	0	0	5726.92	0	0	0	0	0	1495.93	0	0	0	0	0	1127.28	0
CORO1B	Non-matrisome	Non-matrisome	GO:CC not extracellular matrix	F1RUX1	F1RUX1	F1RUX1_PIG	0	2323.75	0	3608.94	4872.58	5158.93	3196.32	9155.94	3683.46	5998.6	12818.4	0	6378.65	0	5401.34	0	2140.63	4887.76	4186.23	2452.15	0	1825.97	1486.27	3964.82	1339.73	0	0	11132.7	0	6429.04	0	0	1837.68	2473.09	0	3626.79	2991.21	0	3211.43	0	0	1440.84	4093.72
CORO1C	Non-matrisome	Non-matrisome	GO:CC not extracellular matrix	F1RGA9	F1RGA9	F1RGA9_PIG	0	2059.57	0	2258.04	3412.42	2669.78	4247.21	12720.3	7071.05	12446.5	17001	11309.1	4293.48	0	1447.62	0	1109.51	2130.05	1950.45	1284.14	0	703.219	911.295	1349.88	417.725	11448.5	4824.85	6210.16	4267.18	4235.49	0	1488.18	1067.28	1076.28	1019.12	1745.19	922.803	2058.41	2731	0	3258.73	1283.03	0
CORO2B	Non-matrisome	Non-matrisome	GO:CC not extracellular matrix	A0A286ZS32	A0A286ZS32	A0A286ZS32_PIG	0	607.762	0	0	1884.59	0	751.958	1959.86	3320.34	4020.4	3546.44	2032.09	1375.63	0	618.587	0	0	0	0	0	0	0	0	0	0	0	2879.9	4890.52	3570.84	3160.79	4150.14	0	0	3095.62	0	3297.64	0	0	0	0	0	0	0
CORO6	Non-matrisome	Non-matrisome	GO:CC not extracellular matrix	A0A5G2QHR4	A0A5G2QHR4	A0A5G2QHR4_PIG	0	10266	10481.6	6325.39	4388.43	11618.7	0	0	0	0	0	0	0	0	6420.83	0	6564.6	11393.9	8747.05	11945.6	9843.13	15184.7	10048.5	9039.5	11238.5	0	0	0	0	0	0	14240.3	12842.2	9794.95	12863.7	14034.1	9962.66	16972.4	11551.7	14111.6	14960	12303.8	15245.7
CORO7	Non-matrisome	Non-matrisome	GO:CC not extracellular matrix	A0A5G2R8I5	A0A5G2R8I5	A0A5G2R8I5_PIG	0	0	0	0	2340.65	0	1907.19	0	0	2594.19	0	2127.86	2565.25	0	1517.72	0	0	1735.4	2590.92	0	0	0	0	0	850.408	4724.6	0	4121.81	0	7045.17	0	0	0	0	0	1300.71	0	0	1327.91	0	0	1653.71	0
COTL1	Non-matrisome	Non-matrisome	GO:CC extracellular matrix (GO:0005576, GO:0005578 & GO:0031012) & GO:CC not extracellular matrix	A0A287AJU1	A0A287AJU1	A0A287AJU1_PIG	0	6365.05	14623.2	9588.97	12812.3	10934.1	24992.4	17305.5	14503.3	29476.8	19242.8	34937.8	16711.9	0	3559.45	0	8725.96	13133	9215.13	2413.83	0	0	0	3503.26	0	0	9755.86	4435.64	5427.83	6965.21	0	0	1247.1	0	0	2224.72	0	2539.99	2109.35	0	1878.91	2778.14	2961.17
COX14	Non-matrisome	Non-matrisome	GO:CC not extracellular matrix	A0A8W4FMC9	A0A8W4FMC9	A0A8W4FMC9_PIG	0	1380.43	0	0	0	0	0	0	0	0	0	0	0	0	885.971	0	2279.47	0	0	3019.4	0	2358.69	3881.62	1824.66	3511.28	0	0	0	0	0	0	2271.91	0	924.794	3149.86	946.664	0	0	6837.08	13483.9	9106.75	3319.7	3176.14
COX15	Non-matrisome	Non-matrisome	GO:CC not extracellular matrix	F1S8W1	F1S8W1	F1S8W1_PIG	0	0	0	0	0	0	0	0	0	0	0	0	0	0	9876.74	0	0	0	979.514	0	0	677.955	0	0	0	0	0	0	0	0	4194.04	0	1390.74	1736.28	0	1348.49	0	3508.37	2100.31	5067.19	3763.43	1994.17	3736.15
COX17	Non-matrisome	Non-matrisome	GO:CC not extracellular matrix	P81045	P81045;D2XUP7	COX17_PIG	0	4444.08	0	0	6171.99	4606.38	0	0	0	0	0	0	0	0	10278.8	0	5542.43	3651.87	0	0	0	0	0	0	0	0	0	0	0	0	0	0	0	0	0	0	0	0	0	0	0	0	0
COX20	Non-matrisome	Non-matrisome	GO:CC not extracellular matrix	A0A287A189	A0A287A189	A0A287A189_PIG	0	784.371	395.469	1705.07	0	1799.68	2120.76	0	0	0	0	0	0	0	324.258	0	666.744	3395.72	1292.02	0	3661.57	4210.33	1043.14	5347.02	3184.87	0	0	0	0	772.931	0	0	4623.17	689.258	1918.18	3988.13	3710.9	0	1190.72	0	0	597.203	0
COX4I1^	Non-matrisome	Non-matrisome	GO:CC not extracellular matrix	Q95283	I3LER5;Q95283	COX41_PIG	0	325879	226939	292036	127738	230219	128448	20013.4	61771.6	28920.8	26496.9	96074.9	87756	0	264088	32095.4	330060	230849	305550	381682	168681	384968	167953	500079	415835	25780	42097.1	18057.3	128667	25570.9	129388	355532	395542	310391	462202	367432	168393	214119	224940	147967	190068	316184	293750
COX4I1°	Non-matrisome	Non-matrisome	GO:CC not extracellular matrix	I3LER5	I3LER5	I3LER5_PIG	0	52657.7	50067.4	28741.5	18922.4	46092.6	24014.5	2915.18	6461.4	5277.75	4289.1	22952.6	18699.1	0	31499.7	48674.5	36815.8	23907.5	50828.7	10432.8	8791.16	24840.5	9975.13	30749	23727.6	4112.3	3271.98	0	28907.3	1421.97	10159.7	22978.6	19152.7	28580.6	27655.1	40454.2	10459	11517.4	7315.54	8074.71	10136.9	23826	29211.1
COX5A	Non-matrisome	Non-matrisome	GO:CC extracellular matrix (GO:0005576, GO:0005578 & GO:0031012) & GO:CC not extracellular matrix	F1SJ34	F1SJ34	F1SJ34_PIG	0	154521	106204	133868	70885.6	219010	61672.1	20614.1	25291	14167.3	20787.5	53533.2	30209.3	0	177611	35281.1	195710	182868	181040	238874	144324	267996	269471	254662	219849	9404.59	19438.3	33043.8	30079.2	20937.6	31770.6	206734	186272	168763	320501	243733	209043	12588.7	22251.6	27855.5	30879.4	33591.3	36424.5
COX5B	Non-matrisome	Non-matrisome	GO:CC extracellular matrix (GO:0005576, GO:0005578 & GO:0031012) & GO:CC not extracellular matrix	Q5S3G4	Q5S3G4	COX5B_PIG	0	634698	414268	383390	273216	588926	207036	34317.4	139187	59708.7	73178.2	160811	173291	0	632692	280470	660341	513424	636048	644244	257209	551539	787042	631043	557343	18306.5	39637	25042.2	211718	46071.6	151155	587222	461624	392813	825205	607405	554259	172999	155110	273224	317264	143530	208393
COX6A1	Non-matrisome	Non-matrisome	GO:CC not extracellular matrix	A0A8D1LI22	A0A8D1LI22	A0A8D1LI22_PIG	0	7387.82	9647.45	9214.37	11635	10953.2	20807.8	21390.6	19923.3	32263.8	26936.9	26009.7	38117.5	0	3054.83	0	12505.9	9851.5	8402.54	14376	31712.3	10822.2	14195.9	9779.9	13081.3	0	29294.6	20889.3	0	23430	16855.3	10281.6	4054.17	0	14195.8	6445.32	21447.7	7068.59	4381.04	0	0	0	13574.4
COX6A2	Non-matrisome	Non-matrisome	GO:CC not extracellular matrix	A0A287AEB7	A0A287AEB7	A0A287AEB7_PIG	0	4967.3	15157	23964.5	9805.69	36532.2	12143.2	0	5393.26	0	0	14642.1	6939.86	0	34532.9	4700.81	22505	38273.2	42431.8	10203.3	16282.8	43121.7	20553.3	35248.2	48435.4	0	0	0	10381.3	0	10429.2	29195.7	27352.6	28410.9	39246.1	31925.2	41090.8	0	1998.49	1952	2517.4	17657	5591.92
COX6B1	Non-matrisome	Non-matrisome	GO:CC not extracellular matrix	A0A4X1TG97	A0A4X1TG97	A0A4X1TG97_PIG	0	199564	165818	178638	93818.3	208014	84754	0	40350.4	0	0	93860.9	51742.2	0	161981	14173.5	258403	193467	219171	103954	63340.8	95522.1	115053	188685	102352	0	0	0	0	0	0	64151.7	101155	72527.7	117209	117958	71037.5	78982.5	53454.7	100611	107317	150351	61021
COX6C	Non-matrisome	Non-matrisome	GO:CC not extracellular matrix	A1XQT2	A0A4X1TXH1;A1XQT2	COX6C_PIG	0	13254.5	6208.32	6454.69	4075.27	11533.1	5269.33	2425.24	2432.33	0	1677.42	0	3684.18	0	15189.8	0	12750	10358.2	15157.2	6507.11	0	8456.14	3118.16	3980.09	0	0	0	0	0	3249.81	0	3882.83	5284.3	5658.54	4816.44	5892.62	0	30759.6	22897.7	93725.2	35340.4	17152.1	35558
COX7A1	Non-matrisome	Non-matrisome	GO:CC not extracellular matrix	Q8SPJ9	Q8SPJ9	CX7A1_PIG	0	106476	98287.2	72703.4	49914.6	96200.9	50520.7	15542.1	17511.6	13539.8	15869.8	38982.1	34922.2	0	102863	14577.4	101669	63371.3	124523	221988	115596	229300	220000	165116	276109	14218.9	18808.3	17266.3	42789.3	14186.5	55191.1	183363	120627	93826.2	327763	110504	193502	124041	85566.3	122636	159045	117515	149331
COX7A2L	Non-matrisome	Non-matrisome	GO:CC not extracellular matrix	A0A4X1SQS6	A0A4X1SQS6	A0A4X1SQS6_PIG	0	3899.99	3240.23	2981.26	3607.67	3735.27	0	0	0	5026.93	0	0	6355.41	0	3352.17	0	3374.22	2593.79	4520.23	3721.36	0	6118.07	3858.24	6023.98	4956.41	0	0	5016.49	0	5649.93	0	2803.75	3849.35	4630.04	4904.48	3538.08	4636.29	3831.14	3212.35	0	3905.86	3771.42	4634.49
COX7C	Non-matrisome	Non-matrisome	GO:CC extracellular matrix (GO:0005576, GO:0005578 & GO:0031012) & GO:CC not extracellular matrix	Q1W0Y2	Q1W0Y2	COX7C_PIG	0	75252.4	52105.2	38614	47800.5	42778.5	36036.8	5894.04	17475.5	20669.7	15276.4	14608.8	31290.8	0	55010.7	14193.3	65480.9	31072.5	40833.9	141846	45440.1	127517	72100.3	144416	187024	0	20177.2	24434.1	0	34993.4	62331.2	56967.5	51387.8	54330.3	180865	35363.8	72183.9	159435	169332	305850	140380	150417	172808
CP	Non-matrisome	Non-matrisome	GO:CC extracellular matrix (GO:0005576, GO:0005578 & GO:0031012) & GO:CC not extracellular matrix	A0A8D1LFT0	A0A8D1LFT0	A0A8D1LFT0_PIG	0	19103	46632.5	35389.9	51460.2	44092.8	48683	53042.6	48438.8	45022.2	87357.1	65463.4	48476.2	0	33847.8	122971	71369.2	51619.7	30455.9	4897.98	14918	1241.7	3416.38	18638.4	2475.98	19997.6	23188.9	16409.6	15542.5	34413.2	12926.4	5663.74	5040.88	3071.1	5444.75	11000.8	1278.26	13586.1	11949.9	12165.7	7761.15	13744	10088.5
CPB2	Non-matrisome	Non-matrisome	GO:CC extracellular matrix (GO:0005576, GO:0005578 & GO:0031012) & GO:CC not extracellular matrix	F1RK01	F1RK01	F1RK01_PIG	0	2685.39	4922.87	4615.31	13034.8	2975.16	9445.2	13074.5	12830	3588.49	14863	9560.36	8291.14	0	2465.93	0	7793.89	3350.97	2668.6	0	0	0	1002.05	2758.79	0	0	0	0	0	879.386	0	0	1778.22	2445.92	0	894.386	0	0	2267.84	0	0	1416.06	0
CPEB3	Non-matrisome	Non-matrisome	GO:CC not extracellular matrix	A0A287BC03	A0A287BC03;A0A286ZUF4;A0A287BFV6	A0A287BC03_PIG	0	0	0	2004.48	0	1310.85	0	0	0	0	0	0	0	0	997.731	0	0	1268.43	1386.33	0	0	0	0	1715.52	3203.63	0	0	0	0	0	0	0	3222.46	3432.42	0	1350.62	2378.04	0	1592.32	0	0	0	0
CPEB4	Non-matrisome	Non-matrisome	GO:CC not extracellular matrix	A0A287BFV6	A0A287BFV6	A0A287BFV6_PIG	0	0	0	0	0	692.864	0	0	0	0	0	0	0	0	918.619	0	0	1020.54	0	0	0	1391.27	0	0	0	0	0	0	0	0	0	0	815.5	1173.37	0	1437.68	886.308	0	0	0	0	0	0
CPM	Non-matrisome	Non-matrisome	GO:CC extracellular matrix (GO:0005576, GO:0005578 & GO:0031012) & GO:CC not extracellular matrix	I3LTE1	I3LTE1	I3LTE1_PIG	0	1449.91	1564.67	970.553	1698.76	1052.55	1653.14	2959.99	3148.49	5737.47	5753.78	4904.95	4554.97	0	636.784	0	0	611.064	0	1778.35	1889.08	0	0	0	0	6071.86	0	4102.05	2391.52	1239.36	2452.33	0	668.219	0	0	0	0	0	1301.15	0	0	0	0
CPN1	Non-matrisome	Non-matrisome	GO:CC extracellular matrix (GO:0005576, GO:0005578 & GO:0031012) & GO:CC not extracellular matrix	F1S8V7	F1S8V7	F1S8V7_PIG	0	1649.36	3978.66	2041.67	7127.32	2152.1	7739.55	3870.43	9304.24	2915.24	8703.68	13241.8	11412.2	0	1437.49	0	5088.98	2847.84	2322.47	0	1401.09	5591.92	507.046	886.879	635.11	0	0	0	0	3234.13	0	0	555.312	0	0	1310.22	0	0	1469.53	0	0	1843	0
CPN2	Matrisome-associated	ECM Regulators	GO:CC extracellular matrix (GO:0005576, GO:0005578 & GO:0031012) & GO:CC not extracellular matrix	I3LF89	I3LF89	I3LF89_PIG	0	0	2427.99	0	2975.79	0	0	3029.53	4332.67	0	5136.33	0	4081.16	0	0	0	2552.32	0	0	0	0	0	0	0	0	0	0	0	0	2020.68	0	0	0	0	0	0	0	0	0	0	0	0	0
CPNE1	Non-matrisome	Non-matrisome	GO:CC not extracellular matrix	F1S4V8	F1S4V8	F1S4V8_PIG	0	26723.1	45468.9	33242.2	49183.7	25733.3	71252.4	96499.2	62681.5	66056.5	81865.5	111200	51851.2	0	17029.6	102535	32717.9	21564.4	20063.2	15840.5	34821.8	3974.44	6423.18	9854.96	7972.16	67512.7	19766.9	30971.3	18650.5	28791	16126	12006	10157.9	21048.6	10539.4	15215.1	6986.97	19962.4	12561.1	8428.87	12712.6	18691.9	24843
CPNE3	Non-matrisome	Non-matrisome	GO:CC not extracellular matrix	A0A4X1UBQ4	A0A4X1UBQ4	A0A4X1UBQ4_PIG	0	7815.21	6905.81	7252.54	15345.4	6095.69	18079.9	22357.6	22229.3	32386.1	29467.8	19483.7	20057.2	0	3822.54	15220	6483.41	4151.36	5226.07	3891.98	4109.84	1787.15	2497.71	3625.33	2928.32	25175.3	13778.1	10915.1	15337.6	10811.3	10637.8	4448.93	3892.62	4959.33	2978.62	4959.16	3922.76	3018.06	3056.66	0	3737.29	3418.21	4690.05
CPNE8	Non-matrisome	Non-matrisome	GO:CC not extracellular matrix	I3LB11	A0A287A2T7;A0A287BJ66;I3LB11	I3LB11_PIG	0	1456.36	0	0	2262.67	0	6674.36	6524.75	7451.77	6392.09	8907.12	9348.12	6078.92	0	0	0	0	976.713	0	1902.75	2310.73	0	0	0	0	10343.1	6025.93	5737.86	5979.39	4746.13	4597.9	0	0	0	0	1398.33	0	0	0	0	0	0	0
CPOX	Non-matrisome	Non-matrisome	GO:CC not extracellular matrix	F1SK95	F1SK95	F1SK95_PIG	0	2506.47	3643.92	3366.9	3337.66	4008.94	5456.82	3671.91	3290.47	921.402	2052.89	0	5151.71	0	3552.82	0	4993.94	3060.97	5327.41	2711.79	0	2890.48	3322.53	2498.54	3323.02	0	0	0	0	1734.96	0	3075.8	2317.71	3008.52	3825.55	2195.69	3032.82	7303.89	3552.76	5998.48	6381.77	3318.76	5409.77
CPPED1	Non-matrisome	Non-matrisome	GO:CC extracellular matrix (GO:0005576, GO:0005578 & GO:0031012) & GO:CC not extracellular matrix	A0A5G2QI52	A0A5G2QI52	A0A5G2QI52_PIG	0	1424.19	3868.45	1954.65	2420.59	2021.02	2316.14	0	2261.67	0	0	0	0	0	2658.57	17666	3660.44	2667.2	1838.09	0	0	0	0	992.351	0	0	0	0	0	0	0	0	0	0	0	659.976	0	0	1180.08	0	0	392.637	0
CPS1	Non-matrisome	Non-matrisome	GO:CC not extracellular matrix	A0A287B4L9	A0A287B4L9	A0A287B4L9_PIG	0	1600.72	5860.71	4156.74	3646.4	3759.63	22629.3	10854.3	11103.9	6186.42	10963.4	26503.7	22486.7	0	1860.44	0	2483.68	3897.01	4687.6	3992.97	17745.4	3362.82	2439.24	4316.63	6544.08	18162.9	23065.1	16783	19467.5	4222.92	29288	4868.95	5421.13	6454.77	3655.44	3164.05	6055.55	8319.73	6819.93	27166.3	9391.22	7265.13	15212.8
CPSF2	Non-matrisome	Non-matrisome	GO:CC not extracellular matrix	A0A4X1SMG0	A0A4X1SMG0	A0A4X1SMG0_PIG	0	1350.61	1797.92	3891.44	1850.18	2547.76	6029.13	10458.3	5923.33	7427.9	11131.5	8456.92	5856.21	0	973.106	0	1350.11	1071.39	1297.68	3234.58	5890.75	2015.41	2033.31	1472.59	2754.82	16153.5	0	12260.5	4152.07	4964.05	6957.53	2454.46	3281.66	2518.67	1729.69	2188.22	2374.47	5290.39	1594.24	0	0	1649.66	3455.81
CPSF6	Non-matrisome	Non-matrisome	GO:CC not extracellular matrix	A0A287AGJ7	A0A287AGJ7	A0A287AGJ7_PIG	0	1260.7	862.509	4891.92	3016.04	2398.65	4621.09	4890.15	1449.13	4684.54	3906.7	8250.11	3314.78	0	1116.35	0	1160.97	1227.6	1971	0	1638.7	672.604	0	437.637	3307.4	0	0	0	1547.22	1494.09	0	0	1763.61	0	0	550.674	0	0	223.798	0	0	0	0
CPSF7	Non-matrisome	Non-matrisome	GO:CC not extracellular matrix	F1RKQ8	F1RKQ8	F1RKQ8_PIG	0	0	0	0	0	0	0	1553.11	0	500.577	1861.37	2609.18	1629.27	0	248.347	0	0	0	0	0	0	0	0	0	0	0	2229.21	5142.54	0	2078.21	2399.23	0	0	0	0	0	0	0	0	0	0	0	0
CPT1A	Non-matrisome	Non-matrisome	GO:CC not extracellular matrix	F1RY68	F1RY68	F1RY68_PIG	0	1084.64	0	1793.42	2899.19	0	1977.94	4867.82	3413.11	5580.82	2442.1	4183.26	0	0	1152.31	0	0	921.682	0	696.882	4402.63	0	0	0	0	6884.66	8213.86	9265.21	4496.14	5945.44	3490.75	0	2014.9	2148.11	0	1560.54	0	0	2062.26	0	1313.43	1178.74	2289.99
CPT1B	Non-matrisome	Non-matrisome	GO:CC not extracellular matrix	Q8HY46	Q8HY46	CPT1B_PIG	0	18191.2	15532.2	21394.8	9389.8	16371.8	11733.9	4246.45	5972.52	0	0	9602.5	6480.53	0	23609.1	0	12463.6	20604.6	21038.1	22980	17366.6	9044.54	8467.45	9453.61	21499.9	6937.62	7626.43	5373.31	15015.8	3462.05	23080.8	39122.4	38017.8	49486	12495.4	34149.1	14745.3	87501.9	60671.6	106640	127550	57876	94259.5
CPT2	Non-matrisome	Non-matrisome	GO:CC extracellular matrix (GO:0005576, GO:0005578 & GO:0031012) & GO:CC not extracellular matrix	A0A8D1AA90	A0A8D1AA90	A0A8D1AA90_PIG	0	45718.1	49609.5	41015.6	32374.4	64942.3	34631.7	10410.2	21150.7	14774.7	15908	23992.4	15301.3	8786960	76729.5	71404.6	57195	81570.8	62988.1	42214.4	33002.4	106168	69659.6	69473.7	52752.1	14509.6	20936	19704	18625.9	19474.5	21973.5	61605.8	52383.2	59965	67103.4	60490.5	77139.3	58540.4	56568.1	63165	75274.5	58418.5	59755.7
CPXM1	Non-matrisome	Non-matrisome	GO:CC not extracellular matrix	A0A480KGE1	A0A480KGE1	A0A480KGE1_PIG	0	1849.87	0	0	5039.16	0	8674.64	5325.47	3518.75	5325.99	6461.85	0	8468.12	0	0	0	3268.75	0	0	6896.68	0	0	0	0	0	0	0	0	0	8798.86	6661.46	0	0	0	0	0	0	0	0	0	0	0	0
CPXM2	Non-matrisome	Non-matrisome	GO:CC not extracellular matrix	F1SEC6	F1SEC6	F1SEC6_PIG	0	5201.99	0	3519.78	10382.7	2198.19	26894.4	31028.4	40186.3	45175	48784.3	65369.4	37444.8	0	0	0	3322.73	0	850.223	0	3941.48	0	0	0	0	22858.5	12458.8	18943.2	12164.1	14403.8	13927.1	0	0	0	0	0	0	0	0	0	0	0	0
CPZ	Non-matrisome	Non-matrisome	GO:CC not extracellular matrix	A0A5G2QYK5	A0A5G2QYK5	A0A5G2QYK5_PIG	0	0	0	0	0	0	0	0	0	7394.17	7928.43	0	0	0	0	0	0	0	0	0	0	0	0	0	0	3706.82	4177.16	9540.83	3141.05	3407.36	0	0	0	0	0	0	0	0	0	0	0	0	0
CRABP1	Non-matrisome	Non-matrisome	GO:CC not extracellular matrix	B3F0B7	B3F0B7	B3F0B7_PIG	0	0	0	0	1098.28	697.577	0	3336.56	2493.64	3618.33	6784.83	6344.4	2941.91	0	0	0	0	0	0	0	0	0	0	0	0	0	0	0	0	0	0	0	0	0	0	0	0	0	0	0	0	0	0
CRADD	Non-matrisome	Non-matrisome	GO:CC not extracellular matrix	A0A8W4FH27	A0A8W4FH27	A0A8W4FH27_PIG	0	1588.07	0	1308.78	1603.81	1331.82	1044.98	0	0	0	0	0	0	0	1980.86	0	1738.49	1054.48	0	0	2991.38	3006.49	4396.75	2669.42	3276.94	0	0	0	0	1259.53	0	2086.93	241.873	2022.34	3931.86	1839.82	2710.06	0	1302.7	0	0	1862.5	0
CRAT	Non-matrisome	Non-matrisome	GO:CC extracellular matrix (GO:0005576, GO:0005578 & GO:0031012) & GO:CC not extracellular matrix	A0A286ZRC3	A0A286ZRC3	A0A286ZRC3_PIG	0	173148	186640	219061	151200	188698	122108	44979.8	54950.8	30364.3	38323.8	87987	41272.7	0	220001	164158	219313	192640	180017	56566.1	85476.5	33160.5	45912.1	110547	50895.5	54026.6	24400.9	41094.3	40094.9	22230.6	44248	55209.1	116384	97445.1	65310.4	117616	59808.6	148357	176984	123538	137529	167370	153058
CRBN	Non-matrisome	Non-matrisome	GO:CC not extracellular matrix	A0A287BAH3	A0A287BAH3	A0A287BAH3_PIG	0	0	0	1906.57	0	2609.39	0	0	0	0	3553.55	0	0	0	1102.98	0	1794.92	2205.02	1075.32	3120.22	0	1601.83	1545.14	1378.01	1281.74	9818.42	0	0	0	2202.33	0	3141.72	2299.48	3514.93	1797.99	2285.48	4107.62	0	724.585	0	0	1991.03	1508.17
CREB1	Non-matrisome	Non-matrisome	GO:CC not extracellular matrix	A0A8D1W8I5	A0A8D0MKF9;A0A8D1W8I5;F1SHC5	A0A8D1W8I5_PIG	0	800.323	0	0	1295.22	1384.4	0	2956.82	0	4168.52	4052.82	0	2422.06	0	429.413	0	784.252	0	0	926.874	0	0	464.475	0	0	0	0	0	0	1675.77	0	0	464.193	0	0	684.476	0	0	0	0	0	0	0
CREG1	Non-matrisome	Non-matrisome	GO:CC extracellular matrix (GO:0005576, GO:0005578 & GO:0031012) & GO:CC not extracellular matrix	F1S268	F1S268	F1S268_PIG	0	0	0	0	0	1311.61	1543.58	0	0	0	0	0	0	0	1094.91	0	1678.97	0	1267.06	0	0	0	689.981	0	0	0	0	0	0	705.309	0	0	0	0	0	566.544	0	0	0	0	0	0	0
CRELD1	Core matrisome	ECM Glycoproteins	GO:CC not extracellular matrix	F1SQD9	F1SQD9	F1SQD9_PIG	0	7642.13	9232.04	17736	2624.97	10045	15706.3	3664.1	3321.25	8050.83	7220.16	6456.47	12750.3	0	6580.6	0	8149.1	12545.3	7409.96	3265.65	13872.7	4679.36	4089.46	10541.1	8360.21	0	5014.33	10543.4	0	2655.3	5196.88	4920.01	11529.7	13730.2	6651.88	9261.59	8552.49	5240.18	9836.43	2340.34	0	5002.12	6131.7
CRIP2	Non-matrisome	Non-matrisome	GO:CC not extracellular matrix	A0A287A2M4	A0A287A2M4	A0A287A2M4_PIG	0	1294.54	0	2693.78	0	1850.15	0	8310.45	0	0	5896.79	0	0	0	985.229	0	1122.28	1501.22	1623.55	1470.91	0	561.636	704.827	1592.67	544.905	0	0	0	0	2199.07	0	0	1242.81	1562.51	0	1585.14	0	0	0	0	0	0	0
CRISPLD2	Core matrisome	ECM Glycoproteins	GO:CC extracellular matrix (GO:0005576, GO:0005578 & GO:0031012) & GO:CC not extracellular matrix	K7GSW9	K7GSW9	K7GSW9_PIG	0	1230.84	0	1030.42	3454.43	0	5187.99	6050.24	7783.69	8073.89	8521.88	0	2774.31	0	0	0	0	0	0	2962.97	0	0	0	0	0	4984.17	12746.2	12868.6	13807.1	3097.4	12386.7	0	0	0	0	0	0	0	0	0	0	0	0
CRK	Non-matrisome	Non-matrisome	GO:CC not extracellular matrix	A0A286ZTD8	A0A286ZTD8	A0A286ZTD8_PIG	0	3316.91	5016.31	6094.74	5326.96	4148.41	6155.43	6895.1	4198.54	5945.65	9063.72	15857.4	5370.6	0	3399.4	0	5300.47	3585.54	4255.66	0	2406.93	1923.38	1941.85	2305.94	2086.21	0	0	0	0	2104.48	0	0	1349.56	0	1832	2490.61	0	0	1454.33	0	0	1303.71	1377.6
CRKL	Non-matrisome	Non-matrisome	GO:CC not extracellular matrix	A0A4X1UYQ0	A0A4X1UYQ0	A0A4X1UYQ0_PIG	0	6381.65	7911.45	8654.88	6214.43	7401.57	5044.64	4049.49	5288.38	5173.29	5906.5	0	5313.57	0	7745.79	0	8319.49	7774.39	6730.45	2521	0	2312.19	2909.05	6680.83	2410.36	0	0	0	0	3509.15	0	1656.35	3673.3	2500.89	2906.13	5001.38	0	2758.25	4514.17	3276.33	2654.14	2986.74	2568.76
CRNKL1	Non-matrisome	Non-matrisome	GO:CC not extracellular matrix	A0A287AHU4	A0A287AHU4	A0A287AHU4_PIG	0	2010.46	0	0	3810.34	0	4755.68	6272.27	8793.99	3798.44	0	4276.01	6082.19	0	0	0	0	0	0	5501.86	3703.73	0	3105.35	0	5888.06	14505.5	0	15189.6	0	6842.83	1738.09	0	5125.58	0	3648.54	2749.22	5846.05	0	0	0	0	2432.64	2131.57
CRP	Non-matrisome	Non-matrisome	GO:CC extracellular matrix (GO:0005576, GO:0005578 & GO:0031012) & GO:CC not extracellular matrix	O19062	A0A4X1VQN0;O19062	CRP_PIG	0	574.33	5239.78	0	5413.65	5419.12	7645.77	0	8901.35	11395.1	6823.75	0	6502.37	0	844.246	0	4504.37	5760.25	1916.03	1722.58	8779.27	0	1437.1	5273.85	2588.39	5112.13	21177.5	3718.74	13281	27815.7	10935	0	1049.67	1320.13	2580.39	3177.88	2679.45	0	2507.25	0	6319.13	6137.58	3431.43
CRTAP	Non-matrisome	Non-matrisome	GO:CC not extracellular matrix	A0A8W4F8B6	A0A8W4F8B6	A0A8W4F8B6_PIG	0	2469.76	0	0	1470.59	900.397	15465.4	4166.04	4294.85	13574.4	8005.04	5577.12	4252.57	0	0	0	1073.06	0	0	2696.15	0	947.353	990.137	0	1320.96	0	6181.9	13096.6	0	7206.95	6315.71	0	0	1915.19	1389.52	1415.26	0	0	0	0	0	0	0
CRTC3	Non-matrisome	Non-matrisome	GO:CC not extracellular matrix	A0A286ZST9	A0A286ZST9	A0A286ZST9_PIG	0	0	0	0	0	0	0	0	0	0	0	0	0	0	0	0	0	0	0	0	0	1428.65	1133.48	0	1359.95	0	0	0	0	4017.96	0	0	0	0	1278.44	0	0	0	740.81	0	0	1195.98	0
CRYAB	Non-matrisome	Non-matrisome	GO:CC not extracellular matrix	Q7M2W6	Q7M2W6	CRYAB_PIG	0	480574	508157	472742	206649	444531	216799	51281.7	116404	41799.7	59376.6	254568	120220	0	172889	375592	469905	469226	398377	697910	750265	716642	840255	492876	699017	62008.5	91467	61982.1	300480	75812.5	184150	570135	342134	459137	1112880	537504	802522	359300	503257	760844	400357	550172	530498
CRYBG3	Non-matrisome	Non-matrisome	GO:CC not extracellular matrix	I3LUY9	I3LUY9	I3LUY9_PIG	0	728.737	1438.54	1622.26	1118.85	1152.51	0	2531.84	0	0	2023.72	0	0	0	308.626	9095.68	1816.33	579.267	1136.02	1326.59	1092.24	1125.79	1768.86	1509.72	826.454	0	0	3748.64	0	2346.31	0	1053.34	1351.68	1939.05	1073.58	986.858	2195.1	0	0	0	0	920.165	1819.96
CRYL1	Non-matrisome	Non-matrisome	GO:CC not extracellular matrix	Q8SQ26	A0A287B6X3;Q8SQ26	CRYL1_PIG	0	3498.12	4856.03	6491.32	6196.38	5251.94	8913.22	7826.6	4821.19	6098	12516.2	14998.4	8449.25	0	4913.87	0	5960.66	4770.21	4880.36	3491.79	3345.82	1832.06	2289.43	2806.6	2392.54	6034.37	13138.9	7943.96	9583.36	5266.72	9563.03	2539.48	1987.41	4177.84	2443.64	2304.46	3686.56	3604.39	2272.4	0	0	2803.93	4148.81
CRYZ	Non-matrisome	Non-matrisome	GO:CC not extracellular matrix	Q0MVN8	Q0MVN8;Q19QT8	QOR_PIG	0	3438.23	0	3895.79	6874.38	4783.22	0	0	0	0	2816.33	0	3665.55	0	5660.72	10383.2	6569.5	4768.55	4996.11	1349.14	0	0	0	0	1243.3	0	0	0	0	0	0	0	1314.64	0	989.971	1914.82	0	1598.59	3138.77	0	2298.61	2935.14	2632.89
CS	Non-matrisome	Non-matrisome	GO:CC not extracellular matrix	P00889	P00889	CISY_PIG	0	258064	369428	252360	371448	343801	235149	112801	110685	52389.6	54035.9	142471	68973.9	102205000	363397	297242	450453	395002	416971	72672.5	42590	43857.8	72526.3	121367	63469	27246.1	44893.3	15074.5	39850.7	27475.4	23852.9	58487.5	105574	88645.4	76047	143734	56672.8	248761	232265	214192	302895	249154	258735
CSDE1	Non-matrisome	Non-matrisome	GO:CC not extracellular matrix	A0A287B2T9	A0A287B2T9	A0A287B2T9_PIG	0	1754.76	2768.58	1976.21	1339.32	1462.76	0	0	0	0	0	0	0	0	1241.11	0	1341.63	2300.49	1239.75	0	0	2134.16	2106.72	1309.19	1875.37	0	0	0	0	5146.08	0	2091.42	2058.12	1373.21	2910.63	1874.44	2471.36	2001.43	2014.83	0	0	1329.55	0
CSE1L	Non-matrisome	Non-matrisome	GO:CC not extracellular matrix	I3LPP4	I3LPP4	I3LPP4_PIG	0	5735	5358.15	8418.59	6316.76	6541.42	10261.9	10715	9655.44	10542.4	10008.7	19050.3	12617.6	0	4173.92	21039.2	5085.16	4049.14	4759.11	8625.54	12772.5	4744.2	7444.73	6048.54	8010.45	41854.6	19648.9	30679.8	33787.3	17814.2	33895.8	14287	12142.4	11205.1	11278.5	9681.84	9911.08	14809.5	9339.96	18636.4	18846.6	11802.7	14397.7
CSK	Non-matrisome	Non-matrisome	GO:CC not extracellular matrix	A0A8W4FAC0	A0A8W4FAC0	A0A8W4FAC0_PIG	0	1658.24	2119.38	2153.87	2780.32	1849.84	4354.62	4106.63	2891.31	3802.37	5124.03	8266.77	2884.34	0	1019.86	0	1162.6	2170.29	1656.05	1970.07	6335.07	1614.14	1447.58	1951.49	3165.82	14192.5	5420.05	19176.9	6040.64	9995.7	6293.14	2595.14	2371.77	1609.38	1427.34	1602.33	2679.71	3160.94	2374.29	2649.63	3414.43	2270.65	2517.58
CSNK1A1^	Non-matrisome	Non-matrisome	GO:CC not extracellular matrix	O19175	O19175;A0A4X1T7N0	KC1A_PIG	0	6375.76	5342.08	6885.32	6979.11	4097.4	9702.33	12903.4	9721.29	21412.8	13384.4	11995	10221.6	0	1438.73	0	4477.51	4435.85	3937.62	6808.13	7772.3	7857.63	6856.04	7590.83	7648.84	16864	10478.5	12537.4	7312.48	10380	11007.9	8169.88	8031.97	9273.17	10938	10058.9	10733.8	13949.9	9118.81	16442	12221.5	11544.7	8758.33
CSNK1A1°	Non-matrisome	Non-matrisome	GO:CC not extracellular matrix	A0A4X1T7N0	A0A4X1T7N0	A0A4X1T7N0_PIG	0	0	0	0	966.859	0	0	0	0	0	2355.11	0	0	0	1136.59	0	952.388	1338	0	1915.84	0	1440.71	1851.15	2208.57	1376.86	0	0	0	0	2827.57	4313.95	2064.17	1691.37	1013.03	0	1938.19	0	3744.27	2453.72	0	3414.43	2207.27	0
CSNK1D;CSNK1E	Non-matrisome	Non-matrisome	gene not present in GO IDs	A0A287ATT3;M3VH47	A0A287ATT3;M3VH47	A0A287ATT3_PIG;M3VH47_PIG	0	2886.83	2905.71	2719.26	2185.46	3298.82	4904.74	6849.49	4470.93	7708.76	5335.31	9044.3	1956.66	0	1600.27	0	2941.23	2578.18	1905.98	1767.89	0	2237.18	2859.79	2603.93	2412.89	7368.43	0	2261.8	3025.63	4049.31	2745.78	3653.89	2843.27	1306.07	3127.98	1806.09	2089.08	1944.48	1461.4	0	0	1475.98	0
CSNK1G1	Non-matrisome	Non-matrisome	GO:CC not extracellular matrix	A0A286ZQ62	A0A286ZQ62	A0A286ZQ62_PIG	0	0	0	0	1183.23	0	1873.58	0	0	1461.41	2626.41	0	0	0	389.835	0	0	0	0	0	2480.71	547.197	0	0	475.47	0	0	0	0	2507.49	0	0	0	1399.07	0	0	1722.14	0	0	0	0	0	0
CSNK2A1	Non-matrisome	Non-matrisome	GO:CC not extracellular matrix	A0A4X1SPI6	A0A4X1SPI6	A0A4X1SPI6_PIG	0	4204.88	4085.56	3841.55	4510.76	3436.89	5009.22	8797.63	6115.1	4985.46	7725.65	11272.9	6460.3	0	3248.65	0	3136	2634.3	2948.1	7807.85	6736.33	4289.61	4548.65	6159.55	3405.47	11795.1	12984.1	10091.3	12064.7	16995.6	11304.8	3529.09	4940.62	3954.94	8066.42	3544	5391.93	6840.16	5167.17	5596	3732.71	3471.67	2433.2
CSNK2A2	Non-matrisome	Non-matrisome	GO:CC not extracellular matrix	K9IVE3	K9IVE3	K9IVE3_PIG	0	2457.16	4200.25	2298.23	4203.89	1885.19	4277.76	3387.18	5456.9	4390.57	3943.42	7664.44	5560.62	0	1483.77	0	2127.22	0	0	4970.58	7802.79	1100.19	1724.03	2643.58	1944.46	23585.7	6091.4	14555.5	11457	10657.6	8111.61	1757.99	2275.55	1894.3	4051.32	2064.22	1653.69	2656.45	3265.37	0	3464.95	3127.19	2199.86
CSNK2B	Non-matrisome	Non-matrisome	GO:CC extracellular matrix (GO:0005576, GO:0005578 & GO:0031012) & GO:CC not extracellular matrix	P67872	P67872	CSK2B_PIG	0	0	0	3427.76	0	2784.38	0	8980.07	0	5535.26	8119.06	0	1798.71	0	2236.48	0	1833.31	0	2784.82	5091.71	0	1943.14	2252.24	2516.97	2979.83	0	15343.5	9803.87	0	8160.84	0	0	3553.15	2282.38	2812.02	2511.44	2618.15	0	2640.73	12658.4	0	2977.81	0
CSPG4	Matrisome-associated	ECM-affiliated Proteins	GO:CC extracellular matrix (GO:0005576, GO:0005578 & GO:0031012) & GO:CC not extracellular matrix	F1SJ86	F1SJ86	F1SJ86_PIG	0	6250.14	10419.5	8039.1	6623.68	4908.09	15613.5	20086	6309.71	14294.7	14078.8	6409.33	16575.7	0	2632.93	0	3171.01	4020.17	5828.33	4383.81	13764.1	2858.88	1824.54	3900.48	4159.72	9944.21	0	13332.8	5485.88	10958.7	19448.4	2285.61	2130.4	3370.62	3973.38	3901.38	4653.58	0	1462.84	0	996.729	1604.02	2556.13
CSRP1	Non-matrisome	Non-matrisome	GO:CC not extracellular matrix	A0A287APN0	A0A287APN0	A0A287APN0_PIG	0	4555.82	6229.06	7446.34	6852.85	3854.15	8213.2	8083.53	6487.13	8442.9	12941.1	12752.2	7565.38	0	3874.58	0	4779.52	4492.81	4020.78	2974.66	0	0	1255.45	6028.63	0	0	8085.28	4702.54	6220.86	4955.34	0	0	2389.28	3027.68	0	2720.75	0	0	1190.33	0	1279.53	2133.85	0
CSRP2	Non-matrisome	Non-matrisome	GO:CC not extracellular matrix	A0A5G2QYU2	A0A5G2QYU2	A0A5G2QYU2_PIG	0	1493.32	0	1640.25	3072.12	0	4554.33	3259.88	4001.73	9894.2	5669.57	0	4614.67	0	911.7	0	0	0	0	0	0	0	0	1426.64	0	0	0	0	0	3169.97	0	0	0	0	0	996.226	0	0	0	0	0	0	0
CSRP3	Non-matrisome	Non-matrisome	GO:CC not extracellular matrix	F6Q6A7	F6Q6A7	F6Q6A7_PIG	0	53543.7	67323.8	44198	25897.3	49199.1	19302.7	8498.82	11465.7	4633.22	1571.96	18494.7	7692.01	0	49059.8	0	40650.6	40812.9	41624.8	37267.1	22243.3	26848.4	29873.2	27970.1	40513	0	5309.17	0	16440.5	2798.65	11451.8	24903	35499	35425.3	41503.4	79343.8	11960.5	12803.3	17016.6	11563.5	15688.8	17065.6	16726.5
CST3	Matrisome-associated	ECM Regulators	GO:CC extracellular matrix (GO:0005576, GO:0005578 & GO:0031012) & GO:CC not extracellular matrix	Q0Z8R0	Q0Z8R0	Q0Z8R0_PIG	0	650.907	1091.02	1277.92	821.599	619.659	1064.83	0	687.805	955.92	1661.16	0	1107.91	0	598.815	0	1458.87	580.247	689.277	0	929.906	0	0	911.09	381.403	0	0	0	0	490.486	0	0	694.038	0	521.382	530.05	508.861	0	0	0	0	0	0
CSTB	Matrisome-associated	ECM Regulators	GO:CC extracellular matrix (GO:0005576, GO:0005578 & GO:0031012) & GO:CC not extracellular matrix	Q29290	Q29290	CYTB_PIG	0	12141.2	15564.8	7243.56	12719.2	10816.4	21486	21231.1	15983.6	19068.3	24438.7	18089.1	15792.5	0	7223.95	38287.9	25097.7	9340.05	8381.79	3443.13	0	0	3888.05	4012.53	0	0	0	4362.43	9558.74	2866.9	5842.97	0	0	0	2331.62	5001.88	0	0	0	0	2866.93	0	0
CSTF2T	Non-matrisome	Non-matrisome	GO:CC not extracellular matrix	F1SD01	F1SD01	F1SD01_PIG	0	1095.26	0	0	1027.5	0	3564.62	3280.5	0	4789.9	0	0	3516.74	0	2782.64	0	1172.89	0	0	0	0	0	0	0	1584.6	0	0	0	0	1087.49	0	0	0	0	0	0	0	0	0	0	0	742.809	0
CSTF3	Non-matrisome	Non-matrisome	GO:CC not extracellular matrix	A0A287BQU0	A0A287BQU0	A0A287BQU0_PIG	0	2566.71	1688.12	1559.76	4300.53	1900.35	2168.29	4568.98	5464.06	8063.19	5018.09	8725.8	3412.77	0	1869.77	0	1684.01	920.675	1093.34	1250.68	2044.71	0	0	0	500.282	6491.89	2159.93	0	0	2871.82	0	1735.26	0	1094.32	0	928.203	0	0	0	0	0	0	0
CTBP1	Non-matrisome	Non-matrisome	GO:CC not extracellular matrix	A0A287AM09	A0A287AM09	A0A287AM09_PIG	0	2128.2	2240.07	2016.38	3258.55	1819.73	4213.57	3680.12	3473.66	5123.08	4459.29	4292.54	4117.48	0	1516.24	8890.31	1892.95	2126.69	2006.75	3335.95	3734.21	1358.8	1467.8	1556.77	1471.99	6823.9	8946.15	5363.73	6750.57	6853.72	5733.55	2386.09	1158.69	2103.16	1607.85	1641.31	2063.65	1956.51	1654.96	2568.86	2048.07	1502.01	2047.64
CTBP2	Non-matrisome	Non-matrisome	GO:CC not extracellular matrix	A0A287AIK8	A0A287AIK8	A0A287AIK8_PIG	0	0	0	1514.01	0	513.45	3152.95	2911.31	0	0	3640.51	0	2983.87	0	763.378	0	572.89	883.162	1819.38	1158.43	0	0	0	0	0	5647.22	0	8955.13	8215.08	4068	5008.47	0	0	1188.1	0	714.733	1058.13	0	0	0	0	1611.78	0
CTDNEP1	Non-matrisome	Non-matrisome	GO:CC not extracellular matrix	F1SFU2	F1SFU2	F1SFU2_PIG	0	0	0	0	0	0	0	0	0	0	0	0	0	0	848.845	0	0	0	0	0	0	0	0	0	0	0	0	0	0	0	0	0	1666.11	896.102	0	1433.93	0	0	2974.77	3116.99	0	1814.4	0
CTF1	Matrisome-associated	Secreted Factors	GO:CC extracellular matrix (GO:0005576, GO:0005578 & GO:0031012) & GO:CC not extracellular matrix	F1RG99	F1RG99	F1RG99_PIG	0	2048.88	1841.6	1465.02	2527.78	2945.07	1861.48	0	0	0	0	0	0	0	6466.13	0	2879.55	2490.93	4130.62	0	0	1950.84	3659.44	2183.86	1456.64	0	0	0	0	0	0	1027.08	864.932	0	1266.74	1232.53	0	2819.31	3171.07	0	2022.36	1751.83	0
CTHRC1	Core matrisome	ECM Glycoproteins	GO:CC extracellular matrix (GO:0005576, GO:0005578 & GO:0031012) & GO:CC not extracellular matrix	F1S1D2	F1S1D2	F1S1D2_PIG	0	0	0	0	2347.32	0	5024.46	0	0	3755.38	3567.72	0	6176.2	0	0	0	0	0	0	862.8	0	0	0	0	0	4602.21	0	3131.62	7756.48	2444.41	6500.69	0	0	0	0	0	0	0	0	0	0	0	0
CTNNA1	Non-matrisome	Non-matrisome	GO:CC not extracellular matrix	A0A8D1G1G9	A0A287BS93;A0A8D1G1G9	A0A8D1G1G9_PIG	0	4848.44	3713.81	5146.18	5106.59	3825.07	5545.16	9870.8	7877.8	10256.9	11223.4	8626.83	6840.47	0	2380.2	0	2780.78	2785.58	2833.39	4207.02	2966.7	3337.1	3832.61	4115.91	3227.94	11033.1	11453.8	6736.76	7966.17	11554.8	6061.34	4212.5	2952.44	3676.77	3969.84	4230.21	4546.03	2451.92	2409.57	0	3142.39	2131.31	2820.41
CTNNA3	Non-matrisome	Non-matrisome	GO:CC not extracellular matrix	A0A287AZQ1	A0A287AZQ1	A0A287AZQ1_PIG	0	0	0	1489.85	0	0	0	0	0	0	0	0	0	0	271.424	0	0	0	0	0	1618.88	0	0	0	622.606	0	0	0	0	0	0	0	861.215	0	1406.89	0	915.564	0	1170.91	0	0	1039.28	0
CTNNB1	Non-matrisome	Non-matrisome	GO:CC not extracellular matrix	F6QAP1	F6QAP1	F6QAP1_PIG	0	1411.95	0	3622.22	1756.73	1554.97	6016.54	4176.27	4218.72	6532.84	3428.06	12654.7	3064.89	0	1218.45	0	1175.78	1482.61	2093.05	1470.45	5110.6	1205.56	602.793	1554.77	1605.88	1827.02	6166.78	6868.81	6438.84	3221.32	6544.17	0	2196.05	2050.12	1625.53	2164.72	2253.4	1414.87	1820.26	0	1704.28	1511.07	0
CTNNBL1	Non-matrisome	Non-matrisome	GO:CC not extracellular matrix	A0A8D1GXB2	A0A8D1GXB2	A0A8D1GXB2_PIG	0	0	0	2070.1	1170.64	1468.14	0	2439.47	0	3933.92	4016.95	3132.8	0	0	1327.16	0	1231.02	0	0	0	0	1540.72	1144.36	0	0	0	0	0	0	2279.86	0	0	1510.76	1848.01	1677.34	2272.66	1619.27	0	877.647	0	1274.21	1169.05	1948.4
CTNND1	Non-matrisome	Non-matrisome	GO:CC not extracellular matrix	A0A5G2QJC4	A0A5G2QJC4	A0A5G2QJC4_PIG	0	4129.97	2750.45	3785.95	5768.96	3100.08	6019.98	9155.26	10597.2	9817.4	15459.2	10107.6	7962.66	0	2027.68	0	2119.52	2516.46	2235.68	6785.69	5217.46	3142.69	5619.42	3498.63	4025.1	23268.7	16058.3	17151.6	9580.25	10940.5	16622.5	4004.87	2508.07	3695.13	4572.92	3623.36	4381.22	4220.18	2978.43	4916.44	5219.82	3578.44	3682.82
CTPS1	Non-matrisome	Non-matrisome	GO:CC not extracellular matrix	A0A287B3Y5	A0A287B3Y5	A0A287B3Y5_PIG	0	0	0	1756.92	0	945.937	0	0	0	0	0	0	0	0	984.873	0	0	2197.4	2430.47	1840.38	1969.89	0	1348.64	1428.7	0	5674.9	0	0	0	5579.6	0	0	1515.81	0	1215.89	2062.05	1679.89	1961.27	0	0	1969.12	1421.21	0
CTPS2	Non-matrisome	Non-matrisome	GO:CC not extracellular matrix	A0A4X1UU82	A0A287B3Y5;A0A4X1UU82	A0A4X1UU82_PIG	0	1353.38	0	1203.93	1478.8	0	3063.51	0	0	0	0	0	0	0	1080.83	0	1279.79	1633.75	1095.31	894.711	0	817.941	1197.58	1050.63	1698.2	0	0	0	0	4670.49	0	0	1099.15	1315.9	0	1377.78	1106.32	1474.09	983.936	0	2394.3	1352.19	1032.81
CTRB2	Non-matrisome	Non-matrisome	GO:CC extracellular matrix (GO:0005576, GO:0005578 & GO:0031012) & GO:CC not extracellular matrix	I3LJ52	I3LJ52	I3LJ52_PIG	0	0	0	0	0	0	0	12149.2	0	0	4745.52	0	0	0	0	0	0	0	653.986	0	0	0	0	0	0	0	0	0	0	0	0	0	0	0	0	0	0	11754.4	7530.96	16099.4	15755.6	4083.13	15188.2
CTSA	Matrisome-associated	ECM Regulators	GO:CC extracellular matrix (GO:0005576, GO:0005578 & GO:0031012) & GO:CC not extracellular matrix	A0A480LAY6	A0A480LAY6	A0A480LAY6_PIG	0	1887.13	2104.42	0	2225.14	948.807	2959.22	2039.56	4116.49	2360.61	3620.06	3014.17	3724.94	0	1679.09	0	2315.49	1417.51	1005.48	1341.23	0	0	0	866.028	0	0	0	0	0	2340.29	0	0	985.022	0	0	1137.14	0	0	0	0	0	1546.2	0
CTSB	Matrisome-associated	ECM Regulators	GO:CC extracellular matrix (GO:0005576, GO:0005578 & GO:0031012) & GO:CC not extracellular matrix	A1E295	A1E295	CATB_PIG	0	6306.4	8243.19	10106.1	14434.6	9469.99	12219.9	7376.1	13387.7	19170.5	12081.9	11967.9	15738.4	0	4766.64	0	12304.2	7898.38	7882.62	5942.41	0	0	2539.39	3782.12	2876.55	14264.7	8915.48	11283.4	13367.3	18425.6	7064.39	4128.28	2717.13	3116.27	2849.25	4084.52	2788.27	2293.98	1720.42	0	1229.66	1862.33	3550.72
CTSC	Matrisome-associated	ECM Regulators	GO:CC extracellular matrix (GO:0005576, GO:0005578 & GO:0031012) & GO:CC not extracellular matrix	A0A4X1U3C8	A0A4X1U3C8	A0A4X1U3C8_PIG	0	1094.67	2233.67	1999.86	3311.95	1335.43	2914.45	67007	3215.98	4385.18	2701	0	2886.5	0	2461.46	5317.49	3903.3	2354.42	1395.65	0	0	0	0	1565.02	7218.6	0	0	2691.37	0	3445.01	0	0	0	1576.96	780.143	0	0	0	0	0	0	0	0
CTSD^	Matrisome-associated	ECM Regulators	GO:CC extracellular matrix (GO:0005576, GO:0005578 & GO:0031012) & GO:CC not extracellular matrix	A0A286ZX26	A0A286ZX26	A0A286ZX26_PIG	0	0	0	20338.9	0	78829.7	9587.27	7454.37	4677.02	22741.7	37051.5	39705	11267.6	0	15616	0	13163.4	62276.9	0	24426.5	11593.5	46796.4	45451.3	0	26795.5	12561.1	15623.8	34533.7	44226.8	0	23545.8	0	0	17152.2	80859.5	44601	80121.5	0	0	0	0	4177.32	0
CTSD°	Matrisome-associated	ECM Regulators	GO:CC extracellular matrix (GO:0005576, GO:0005578 & GO:0031012) & GO:CC not extracellular matrix	P00795	P00795;A0A286ZX26	CATD_PIG	0	35876.7	21423.4	21830.6	34608	26468.4	15114.9	15205.3	23445.4	19350.7	24422.6	17538.2	25449.5	0	47101.2	4750	39952.2	16412.7	22282.6	18296.1	6444.57	17411.2	29612.6	28138.5	19795.6	0	9846.15	10104.5	0	18704.8	9532.22	18681.1	22682.7	9727.01	28925.7	25800.7	15260.4	5696.3	6855.17	6697.92	6786.01	6352.61	8786.48
CTSH	Matrisome-associated	ECM Regulators	GO:CC extracellular matrix (GO:0005576, GO:0005578 & GO:0031012) & GO:CC not extracellular matrix	O46427	O46427	CATH_PIG	0	0	0	0	2461.74	753.425	0	0	0	3499.26	0	0	0	0	412.622	0	1071.88	1432.88	0	0	0	0	0	0	0	0	0	0	0	1092.45	0	0	0	0	0	0	0	0	0	0	0	0	0
CTSL	Matrisome-associated	ECM Regulators	GO:CC extracellular matrix (GO:0005576, GO:0005578 & GO:0031012) & GO:CC not extracellular matrix	Q28944	Q28944	CATL1_PIG	0	1740.59	4951.7	3209.5	1715.83	3551.13	4971.18	3422.07	0	2573.3	4176.4	0	3137.82	0	956.43	0	2871.06	5005.19	1817.85	0	0	0	615.46	1120.78	877.057	0	0	0	0	1233.78	0	0	1347.5	0	642.199	1427.79	0	0	0	0	0	0	0
CTSS	Matrisome-associated	ECM Regulators	GO:CC extracellular matrix (GO:0005576, GO:0005578 & GO:0031012) & GO:CC not extracellular matrix	A0A4X1SEC1	A0A4X1SEC1	A0A4X1SEC1_PIG	0	1429.5	0	0	2405.23	1632.98	2745.59	2479.81	4138.54	2159.15	6188.95	6462.58	4277.49	0	2111.22	5655.89	1760.53	2285.57	2583.23	0	0	0	0	0	0	4041.73	0	0	0	3154.42	0	0	0	0	0	0	0	0	0	0	0	0	0
CTSW	Matrisome-associated	ECM Regulators	GO:CC extracellular matrix (GO:0005576, GO:0005578 & GO:0031012) & GO:CC not extracellular matrix	F1RU23	F1RU23	F1RU23_PIG	0	483.825	0	0	1654.46	0	4336.21	0	0	0	2053.78	0	4257.35	0	522.475	0	1120.53	1358.11	0	0	0	0	656.003	576.802	0	0	0	0	0	740.16	0	0	543.213	0	1123.97	554.195	0	0	0	0	0	0	0
CTSZ	Matrisome-associated	ECM Regulators	GO:CC extracellular matrix (GO:0005576, GO:0005578 & GO:0031012) & GO:CC not extracellular matrix	A5GFX7	A5GFX7	A5GFX7_PIG	0	2782.83	5601.74	3294.2	5965.09	3322.37	9645.99	5898.09	6329.12	11631.2	8072.88	8365.99	11905.6	0	1936.14	26049.2	6450.72	4944.62	3111.03	0	5255.39	1303.65	1022	1766.31	1651.77	8504.23	0	0	0	5081.19	5573.85	2437.57	1729.06	1680.09	1675.07	2761.79	0	0	0	0	0	0	0
CTTN	Non-matrisome	Non-matrisome	GO:CC not extracellular matrix	A0A5G2QWJ7	A0A5G2QWJ7	A0A5G2QWJ7_PIG	0	5281.46	5290.4	6404.92	7083.87	5467.94	11964.4	15312.2	11812.5	15706.5	13572.4	15778.1	13060.8	0	3778.23	0	4792.51	3883.25	5031.42	4019.62	0	2257	1803.79	3688.09	3083.94	8558.01	0	7284.65	0	2777.12	0	0	1599.33	2655.57	0	3317.9	2957.38	0	0	7940.48	0	2406.05	0
CTTNBP2NL	Non-matrisome	Non-matrisome	GO:CC not extracellular matrix	F1SBP5	F1SBP5	F1SBP5_PIG	0	0	0	2012.31	0	808.916	0	0	0	0	0	0	0	0	0	0	0	0	0	0	0	0	0	0	788.464	0	0	0	0	0	0	0	1135.44	1338.64	1018.85	1209.95	1515.18	0	0	0	0	0	0
CUEDC1	Non-matrisome	Non-matrisome	GO:CC not extracellular matrix	F1RSB7	F1RSB7	F1RSB7_PIG	0	959.268	0	1162.86	1574.44	849.418	0	0	0	0	0	0	0	0	704.682	5343.94	0	0	0	0	0	0	0	991.773	0	0	0	0	0	0	0	0	769.773	0	0	856.123	0	0	0	0	0	0	0
CUEDC2	Non-matrisome	Non-matrisome	GO:CC not extracellular matrix	A0A286ZXC4	A0A286ZXC4	A0A286ZXC4_PIG	0	0	0	847.836	0	0	0	0	0	0	0	0	0	0	933.971	0	0	0	0	1594.78	1725.66	1806.15	1058.73	0	1367.45	0	0	0	0	0	0	0	1210.87	0	0	0	0	0	0	0	0	0	0
CUL1	Non-matrisome	Non-matrisome	GO:CC not extracellular matrix	A0A4X1UR52	A0A4X1UR52	A0A4X1UR52_PIG	0	5775.06	8657.28	9396.33	8236.38	6546.67	11526.8	6953.37	6651.57	4782.45	5890.67	10263.5	6322.75	0	4235.16	26693	5333.72	7288.61	5333.45	8478.43	14592.8	5164.75	6383.42	4543.63	8026.71	11085.8	0	7779.92	7383.83	5178.37	3373.75	9139.29	8069.85	11657.3	8558.07	7270.75	13430.3	4466.1	5709.98	0	3166.02	5508.83	6769
CUL2	Non-matrisome	Non-matrisome	GO:CC not extracellular matrix	A0A5G2RFR7	A0A5G2RFR7	A0A5G2RFR7_PIG	0	3477.83	2358.28	3316.01	3056.96	2632.36	1085.41	0	0	3222.7	3367.47	0	3357.09	0	2891.55	17940.3	3200.85	1999.63	2587.52	4187.92	0	3175.65	4110.98	3290.77	4979.56	4193.13	4909.69	3602.11	0	4310.18	0	3699.7	4425.52	3758.58	4701.11	3355.21	3674.47	4368.4	4282.3	4638.75	5052.77	3668.35	3040.86
CUL3	Non-matrisome	Non-matrisome	GO:CC not extracellular matrix	A0A8W4FJX5	A0A8W4FJX5	A0A8W4FJX5_PIG	0	10913	12745.3	14224.3	11540.5	12243.2	17057.5	14958.4	16757	12225.6	20640.9	28540.9	13063.8	0	9623.53	10813.3	9748.87	15549	10996.3	8927.57	18384.3	8999.78	10027	10498.4	10310.7	24849.4	9782.19	12759.4	12515.6	13307.5	8198.6	10322	12275.1	12432	13291.6	10779.6	11670.9	10371.2	9758.66	5595.02	10580.2	9563.12	11721.5
CUL4A	Non-matrisome	Non-matrisome	GO:CC not extracellular matrix	A0A5G2QS32	A0A5G2QS32	A0A5G2QS32_PIG	0	9413.42	11973.7	9365.77	6781.94	7561.67	6424.72	7724.54	5421.76	11511.5	5587.38	8123.57	7265.04	0	5615.99	0	6311.82	7335.92	5970.91	14885.7	20676.9	13180.6	11727.2	10258.3	17418.3	31542	11801.2	19306	12886.8	14983.5	19332.9	12235	12871.8	12973.9	15983	9445.03	17164.5	16633.3	13072.1	12356.8	12958.9	12694.9	13403.7
CUL4B	Non-matrisome	Non-matrisome	GO:CC not extracellular matrix	F1RUC1	F1RUC1	F1RUC1_PIG	0	0	0	1900.17	1972.65	1401.16	3903.87	4258.97	0	4327.77	7027.44	10297.4	3314.76	0	901.881	0	1262.68	1372.77	1255.81	2586.14	2598.27	1155.94	1816.88	1176.61	1578.9	12192.1	6794.72	10488.8	10251.6	5530.8	9472.81	2977.54	1087.89	1911.83	3259.08	1798.94	1372.77	2345.83	757.306	0	1952.53	1227.38	1302.78
CUL5	Non-matrisome	Non-matrisome	GO:CC not extracellular matrix	A0A5G2R2M6	A0A5G2R2M6	A0A5G2R2M6_PIG	0	9238.78	9172.94	8470.51	7131.75	6834.99	4103.53	4014.91	4892.9	4024.28	5406.72	11161.6	3285.76	0	7600.9	20382.6	6810.55	5887.62	6820.27	10647.2	9762.37	8519.49	10314.7	10144.4	10808.3	18654.9	4832.11	5555.94	8083.96	5958.65	6267.27	10560.7	10553	9683.34	11158.9	8395.05	10386.5	10538.5	9223.28	8911.38	9317.24	10886.7	9987.79
CUL7	Non-matrisome	Non-matrisome	GO:CC not extracellular matrix	A0A8W4FFW7	A0A8W4FFW7	A0A8W4FFW7_PIG	0	0	0	1915.56	937.182	0	3992.98	6062.71	3693.18	5524.35	8515.25	0	2401.84	0	0	0	0	0	0	3587.12	3113.5	0	0	0	352.804	13578.2	2727.28	15998.3	7063.48	3713.14	8895.45	0	0	1684.67	1230.34	0	1116.7	0	0	0	0	0	0
CUTA	Non-matrisome	Non-matrisome	GO:CC not extracellular matrix	A0A4X1TB30	A0A4X1TB30	A0A4X1TB30_PIG	0	19963.6	33782.1	26782	32945.6	31375.4	14654.2	14393.3	14430.2	9978.45	7841.97	14551.4	5029.93	0	59142.9	0	55663.6	24542.1	44592.3	3629.61	3197.75	937.048	4392.45	8191.05	0	0	0	0	0	8235.97	0	0	3056.67	0	2726.06	5487.34	0	0	0	0	0	1098.85	0
CUX1	Non-matrisome	Non-matrisome	GO:CC not extracellular matrix	A0A5G2QM40	A0A5G2QM40	A0A5G2QM40_PIG	0	0	0	767.244	1490.24	0	1261.08	2033.57	0	978.891	0	0	1733.92	0	1075.74	0	0	1188.52	1092.18	0	0	0	660.749	0	986.483	0	0	0	0	979.796	0	0	0	954.513	917.896	876.035	0	0	1259.15	0	0	795.936	1392.55
CYB5A	Non-matrisome	Non-matrisome	GO:CC not extracellular matrix	P00172	P00172	CYB5_PIG	0	9328.99	8332.68	10058.1	10524	8701.35	13730.5	12994.2	11160.1	12991.8	13335.4	13738.2	13738.9	0	8493.37	0	11028.9	6520.41	7076.03	22499.3	16871.9	9991.31	10661	9692.35	11682.2	16759.2	17833.6	24121.1	21019.6	17627.4	17600.5	7092.88	7661.46	9451.11	9092.51	6942.04	10672	4720.8	5152.26	0	0	2460.72	0
CYB5B	Non-matrisome	Non-matrisome	GO:CC not extracellular matrix	A0A5G2QSC0	A0A5G2QSC0	A0A5G2QSC0_PIG	0	13503.5	9582.38	10333.5	12715	7782.86	17626.3	23393.5	12580.2	16959.7	23046.1	9841.15	25674.2	0	9077.73	0	7994.96	7930.53	5337.92	16693	106079	5509.11	8482.11	12079.1	8286.35	35770.3	27612.9	21725.1	42602.2	19921.4	25311.8	7808.4	7493.14	11094.2	10251.4	9057.45	9473.75	54503.8	42589.4	59165.6	39132.9	23098.9	25747.4
CYB5R1	Non-matrisome	Non-matrisome	GO:CC not extracellular matrix	A0A286ZXF1	A0A286ZXF1	A0A286ZXF1_PIG	0	15008.1	10716.8	11461.1	6552.51	13470.6	7335.33	4075.03	6025.98	4216.02	4184.42	6535.04	5011.31	0	24231.4	36692.3	12126.5	16176.2	17322.3	12167	6111.57	16507.6	20507.4	12223.4	18255	4239.43	0	3089.18	7441.51	4846.83	7210.23	24638.7	21591.8	24483.8	21276.2	21728.8	18348.5	36049.7	34893.1	38505.3	46596.2	25764	25198.8
CYB5R3	Non-matrisome	Non-matrisome	GO:CC extracellular matrix (GO:0005576, GO:0005578 & GO:0031012) & GO:CC not extracellular matrix	P83686	P83686;A0A5G2QPB6	NB5R3_PIG	0	18228.7	13691.1	13265.4	18582.8	12037	22964.9	19384.5	24161.4	31175.1	29328.6	22366.5	18740.7	2700590	13640	0	12115.5	13567.7	12257.6	13900.9	8566.7	3954.56	9378.19	8043.33	7456.85	13695	51173.4	13734.4	22532.8	18062.7	22489.7	9814.97	8982.49	11769.2	9090.27	11811.8	8185.45	15194.4	23341.4	26703.2	25257.9	18790.5	20398.8
CYBB	Non-matrisome	Non-matrisome	GO:CC not extracellular matrix	P52649	P52649;K7GKS3	CY24B_PIG	0	0	0	0	1376.12	0	2456.47	2072.13	2229.59	0	1908.59	0	3613.77	0	0	0	0	1736.92	0	0	0	0	0	0	0	3637.66	3311	5288.63	0	11453	4015.88	0	0	1177.5	0	1481.79	0	0	1259.18	0	1758.23	1570.72	0
CYBC1	Non-matrisome	Non-matrisome	GO:CC not extracellular matrix	F1S010	F1S010	F1S010_PIG	0	0	0	0	0	0	0	1200.03	0	2497.99	1817.25	0	0	0	0	0	0	0	0	1066.62	0	0	534.502	0	0	0	0	4378.54	0	1955.3	0	0	0	0	0	1088.69	0	1917.01	1138.99	0	2092.21	511.547	0
CYBRD1	Non-matrisome	Non-matrisome	GO:CC not extracellular matrix	B2ZPK1	B2ZPK1	B2ZPK1_PIG	0	4945.01	0	4491.15	6784.93	3008.01	14676.1	25517	13282.2	22347.6	25476.3	6329.38	21408.6	0	2319.93	0	3246.17	0	2235.97	0	0	0	0	0	0	0	12416.7	0	0	1512.38	0	0	0	2851.38	0	1735.41	0	0	0	0	0	0	0
CYC1	Non-matrisome	Non-matrisome	GO:CC not extracellular matrix	A0A287AZF9	A0A287AZF9	A0A287AZF9_PIG	0	16294.1	22586.7	16795.2	14118.8	10099.9	22161.2	7350.33	13267.7	6914.96	10718.7	36404.3	5697.9	2970850	24203.5	60607.3	16944.7	21522.9	23597.6	10278.9	23493.4	27140.8	9004.27	19433.7	34388.5	13400.7	14994.5	4969.19	20352.3	4934.53	30411.5	55480.2	9896.44	19080.3	28748.8	5867.28	25427.7	34911.1	15433.9	15566	21132.2	18300.5	30619.2
CYCS	Non-matrisome	Non-matrisome	GO:CC not extracellular matrix	P62895	P62895;A0A8W4FDZ8	CYC_PIG	0	282794	506473	337142	469040	426511	349687	120580	146841	78382.7	37817.7	204693	97996.4	0	257452	65050.1	676291	479269	462017	15504.2	15706.1	6082.57	43271.7	120608	25437.5	5145.8	5383.78	5591.53	11528.9	6522.71	6478.87	30610.4	59509	15521.8	41590.9	90600.8	12051.9	23285.8	29984.1	23718.9	29112.3	14771.1	31945.2
CYFIP1	Non-matrisome	Non-matrisome	GO:CC extracellular matrix (GO:0005576, GO:0005578 & GO:0031012) & GO:CC not extracellular matrix	A0A8W4FEI6	A0A8W4FEI6	A0A8W4FEI6_PIG	0	5227.48	6282.45	4737.37	10412.8	3694.47	15033	16202.6	14272.4	18876.9	18486.9	26055.4	12643.6	0	3001.49	0	2706.23	3863.32	3330.95	6603.69	10281.9	798.248	1709.89	1568.42	2689.99	31136.8	14494.9	18084.9	21628.5	17167	17103.1	2771.78	3761.1	5124.27	3062.6	4833.58	2865.94	6281.67	3402.37	5620.65	5581.27	4090.71	5609.9
CYFIP2	Non-matrisome	Non-matrisome	GO:CC not extracellular matrix	A0A287AVV3	A0A287AVV3	A0A287AVV3_PIG	0	1837.41	1398.76	1929.11	3093.39	1064.85	3665.86	4605.44	3952.19	3610.69	3536.02	5683.62	3181.78	0	892.942	0	1020.31	622.66	1246.98	3020.49	2867.29	0	1065.62	966.721	1206.57	12791.1	6471.3	9752.74	0	10353.7	6064.19	2062.63	1501.97	2329.71	1125.39	1630.15	1152.83	0	1842.68	0	2596.61	1855.63	0
CYGB	Non-matrisome	Non-matrisome	GO:CC not extracellular matrix	F1RWP3	F1RWP3	F1RWP3_PIG	0	1147.27	2237.62	0	2019.09	2319.56	6087.43	0	0	0	0	3045.01	0	0	1573.97	0	2831.08	1581.78	0	0	1296.09	0	0	543.604	0	0	0	0	0	0	0	2008.4	0	0	0	0	0	0	0	0	0	0	0
CYLD	Non-matrisome	Non-matrisome	GO:CC extracellular matrix (GO:0005576, GO:0005578 & GO:0031012) & GO:CC not extracellular matrix	A0A287AUG2	A0A287AUG2	A0A287AUG2_PIG	0	0	0	2971.35	0	2048.89	0	0	0	2330.89	1900.44	0	0	0	0	0	0	1509.06	0	1398.74	2441.31	3281.93	2199.98	1675.23	2587.28	4678.92	0	1691.02	0	1359.57	1073.19	2380.9	1360.02	1136.44	2223.42	1400.6	1537.18	2012.58	911.981	0	942.901	1652.83	1177.24
CYP20A1^	Non-matrisome	Non-matrisome	GO:CC not extracellular matrix	A0A287AY02	A0A287AY02	A0A287AY02_PIG	0	7358.48	4821.79	5143.46	13750.5	4285.56	18933.7	16031.5	19544.3	21272.6	22906.9	33476.4	18128.3	0	1220.03	0	1828.95	3523.67	3595.09	10110.6	11669.7	0	3161.71	2208.22	2646.86	25436	55787.5	41853.9	42730.2	11710.5	52321.4	5321.8	2647.61	4297.5	4024.85	4076.57	4755.31	3945.27	2945.89	2919.9	3432.98	3158.6	3629.05
CYP20A1°	Non-matrisome	Non-matrisome	GO:CC not extracellular matrix	A0A287BFX1	A0A287BFX1	A0A287BFX1_PIG	0	0	0	0	861.398	0	0	934.798	0	0	2031.51	0	0	0	0	0	0	0	0	978.068	0	0	0	0	0	4167.03	0	2931.22	3033.48	1495.16	0	0	0	0	0	0	0	6856.83	0	0	7588.33	0	0
CYP27A1	Non-matrisome	Non-matrisome	GO:CC not extracellular matrix	I3LAB7	I3LAB7	I3LAB7_PIG	0	0	0	2143.81	0	989.094	1757.65	1834.08	0	0	2787.99	6133.62	1586.9	0	417.681	0	880.307	1218.04	0	3210.99	4845.35	3020.29	2908.56	1722.64	2785.94	0	3610.34	15269.4	4612.51	0	2852.82	4321.26	2600.01	5587.21	3173.76	2005.89	5537.04	2514.22	1718.25	2804.18	1571.23	1878.69	2095.32
CYP2B6B	Non-matrisome	Non-matrisome	gene not present in GO IDs	F1RHA1	A0A287AT24;F1RHA1	F1RHA1_PIG	0	3823.89	0	0	6555.55	5634.28	7016.73	9293.35	10560.8	9408.85	21943	6436.87	11566.8	0	3646.92	0	0	4239.09	4361.85	4554.06	6428.01	0	1462.63	0	1696.04	6418	11838.4	14817	17771.8	6000.78	13028.2	3697.46	3832.58	5550.4	0	5994.48	0	8137.98	8157.36	6884.12	6781.43	4489.23	8322.16
CYP2S1	Non-matrisome	Non-matrisome	GO:CC not extracellular matrix	M3VK37	M3VK37	M3VK37_PIG	0	0	0	0	1745.51	0	1890.51	0	0	6861.87	7673.25	5402.58	4030.1	0	0	0	0	0	0	2184.51	0	0	0	0	0	0	5567.37	10999.1	3021.32	1174.48	6768.89	0	0	0	0	0	0	0	0	0	0	0	0
CYP39A1	Non-matrisome	Non-matrisome	GO:CC not extracellular matrix	F1RQQ2	F1RQQ2	F1RQQ2_PIG	0	1943.36	1839.19	1860.86	4559.29	3000.76	5182.38	21699.6	4135.24	24616.6	20539.4	11642.3	3708.75	0	352.041	0	1075.66	1851.01	613.394	3348.7	3802.34	916.963	978.608	0	374.678	10859.3	4333.12	9782.35	6093.84	4840.9	2766.78	1185.85	1282.1	1896.39	1404.16	2497.38	485.114	0	0	0	0	970.899	0
CYP4V2	Non-matrisome	Non-matrisome	GO:CC not extracellular matrix	A0A287B1J6	A0A287B1J6	A0A287B1J6_PIG	0	0	0	0	0	0	0	1667.31	2140.23	0	0	0	2859.17	0	0	0	0	0	0	0	0	0	0	0	444.89	2836.01	0	0	0	1138.4	0	0	0	0	0	0	0	0	0	0	0	614.43	0
CYP7B1	Non-matrisome	Non-matrisome	GO:CC not extracellular matrix	F1RTA9	F1RTA9	F1RTA9_PIG	0	1753.56	0	1421.5	3438.57	1566.68	6497.13	7718.81	5463.1	11486.3	11559.4	10185.9	7492.52	0	586.351	0	0	1614.49	1166.73	4611.81	0	0	0	0	0	12513.4	5567.41	10514.9	6332.75	3403.5	8755.55	0	0	2123.22	0	1372.7	1694.93	0	0	0	0	1502.83	0
CYRIA	Non-matrisome	Non-matrisome	GO:CC not extracellular matrix	F2Z5E7	F2Z5E7	F2Z5E7_PIG	0	0	0	0	942.05	0	0	0	0	0	2858.24	0	1604.56	0	0	0	0	0	0	0	0	0	1021.37	1148.37	978.793	0	5728.62	4186.15	0	1127.07	0	1331.54	0	1001.74	0	776.459	0	0	886.763	0	0	664.651	0
CYRIB	Non-matrisome	Non-matrisome	GO:CC extracellular matrix (GO:0005576, GO:0005578 & GO:0031012) & GO:CC not extracellular matrix	A0A8D0HXM4	A0A8D0HXM4	A0A8D0HXM4_PIG	0	3536.84	8273.34	5551.7	7911.05	4138.71	4418.87	0	4090.07	2183.72	4681.12	6118.87	3173.53	0	6720.75	27826.5	6053.65	5745.88	6805.83	2824.66	3036.39	1919.94	3251.42	2992.09	3346.23	0	0	0	0	8209.73	0	2997.62	3998.29	4596.31	3453.55	4166.22	2617.99	5935.05	4485.7	4779.44	5607.09	4143.24	5341.38
CYTH1	Non-matrisome	Non-matrisome	GO:CC not extracellular matrix	M3UZ36	M3UZ36	M3UZ36_PIG	0	0	0	1607.88	0	0	0	0	0	0	0	0	0	0	857.847	0	0	0	0	0	0	2941.96	1064.92	0	0	0	0	0	0	1395.42	0	0	0	0	0	0	1124.25	1504.24	1020.24	0	0	974.25	0
CZIB	Non-matrisome	Non-matrisome	GO:CC not extracellular matrix	F1S765	F1S765	F1S765_PIG	0	4040.47	5353.93	6360.64	7846.73	5797.16	0	4915.67	4026.13	2193.53	3319.53	4112.29	2929.22	0	7860.27	0	7158.03	7158.25	6521.11	770.987	0	0	525.032	1589.19	0	0	0	0	0	1766.83	0	0	841.883	0	0	1379.32	0	2612.86	2924.28	0	0	1996.49	0
D2HGDH	Non-matrisome	Non-matrisome	GO:CC not extracellular matrix	A0A5G2R4W1	A0A5G2R4W1	A0A5G2R4W1_PIG	0	5334.22	4118.65	4889.12	5072.79	4505.72	5144.71	2541.47	3236.06	1459.19	0	0	3411.73	0	7544.8	3467.45	7958.63	4718.35	5450.51	2825.51	0	2435.2	2478.73	3409.54	2279.68	0	0	0	0	2310.57	0	2520.8	3657.86	4775.94	2558.68	3062.51	2743.98	4632.02	4373.11	0	5769.69	4014.95	4909.15
DAB2	Non-matrisome	Non-matrisome	GO:CC not extracellular matrix	A0A4X1T581	A0A4X1T581	A0A4X1T581_PIG	0	1453	0	0	2035.56	1899.2	5431.7	5848.57	4207.43	7988.2	8119.9	11429.3	5608.9	0	1847.36	0	1429.42	2057.53	0	3583.77	3081.38	1755.82	1771.54	1769.95	2226.4	10800.2	7392.05	8563.21	6110.29	18124.7	13946.5	0	0	0	2769.06	2222.02	2352.5	0	0	0	0	979.883	0
DAB2IP	Non-matrisome	Non-matrisome	GO:CC not extracellular matrix	F1SMD1	F1SMD1	F1SMD1_PIG	0	0	0	0	0	0	0	0	0	0	0	0	0	0	0	0	0	0	0	0	0	0	0	718.79	759.308	4265.44	0	0	0	1486.97	0	0	0	1165.63	0	0	1199.43	0	754.341	0	0	895.994	1045.09
DAD1	Non-matrisome	Non-matrisome	GO:CC not extracellular matrix	Q29036	Q29036	DAD1_PIG	0	6024.05	3575.03	4838	7798.5	2519.23	8165.81	9578.92	12121.1	19062.4	17107.2	6599.99	18296.1	0	1695.11	0	2840.65	2961.1	3621.36	6903.36	0	0	0	0	0	6476.03	30424.3	11581.8	0	10547.3	42900.9	3098.28	5276.95	7132.21	3962.85	4837.11	0	15633.3	11266.6	23614.8	20671.9	11604.3	13593.9
DAG1°	Non-matrisome	Non-matrisome	GO:CC extracellular matrix (GO:0005576, GO:0005578 & GO:0031012) & GO:CC not extracellular matrix	A0A287BAM0	A0A287BAM0	A0A287BAM0_PIG	0	0	0	0	0	757.52	0	0	0	0	0	0	0	0	896.415	0	872.908	0	0	803.728	0	0	634.81	0	0	0	0	0	0	0	0	0	0	0	0	213.695	0	0	0	0	0	0	0
DAG1^	Non-matrisome	Non-matrisome	GO:CC extracellular matrix (GO:0005576, GO:0005578 & GO:0031012) & GO:CC not extracellular matrix	Q29243	Q29243;A0A287BAM0	DAG1_PIG	0	34851	37120.6	33407	25099.5	30141.8	23660.8	17429	25962.5	16319.4	24487.8	26063	25714.1	0	33511.5	34010.2	35039.9	28345.5	30407.8	46013.5	39284.1	30528.9	33315.5	23929.5	26638.5	17770.9	18049.1	28599.6	30119.3	21310.2	19489.8	25437.8	24359.9	22317.5	24828.9	21343	28519.6	53203.6	77412	37680.7	44171.7	43065.3	30777.7
DAP3	Non-matrisome	Non-matrisome	GO:CC not extracellular matrix	A0A5G2QZ25	A0A5G2QZ25	A0A5G2QZ25_PIG	0	1585.43	2328.63	1526.79	944.208	1553.69	1961.12	0	0	0	0	0	0	0	912.414	0	1301.42	2095.29	1892.74	1813.02	3321.79	2051.17	1807.18	1609.87	1999.08	0	0	0	0	1804.65	0	2583.19	1662.99	1968.29	2425.88	1505.52	3701.03	1873.43	1561.76	4175.36	2527.25	2100.92	3538.32
DAPK2	Non-matrisome	Non-matrisome	GO:CC not extracellular matrix	A0A4X1U1Z6	A0A4X1U1Z6	A0A4X1U1Z6_PIG	0	0	0	0	0	0	0	0	0	0	0	0	0	0	518.219	0	0	0	0	0	0	1418.34	999.91	0	0	0	0	0	0	0	0	0	0	1753.96	1668.19	0	0	0	0	0	0	1344.18	0
DARS1	Non-matrisome	Non-matrisome	GO:CC not extracellular matrix	A0A8W4FEH7	A0A8W4FEH7	A0A8W4FEH7_PIG	0	6442.77	4334.5	6452.85	4654.5	6369.15	10412.7	6126.7	5884.85	10109.8	8138.32	9954.02	6894.87	0	4335.52	15389.1	4220.7	4785.23	4570.19	8447.74	9979.22	7740.25	9053.75	7805.2	7334.38	11548.4	11910.7	14034.6	12554.9	18072.4	11992.5	8953.82	9378.33	8653.59	7633.7	8069.97	9492.17	10224	7330.9	9649.88	11174.6	10095.9	9992.63
DARS2	Non-matrisome	Non-matrisome	GO:CC not extracellular matrix	A0A286ZWZ5	A0A286ZWZ5	A0A286ZWZ5_PIG	0	0	0	0	0	0	0	0	0	0	0	0	0	0	997.162	0	742.601	0	0	0	0	0	1762.32	0	0	0	0	0	0	2085.23	0	0	1364.19	0	0	0	0	0	1783.22	0	2489.66	1213.64	0
DAZAP1	Non-matrisome	Non-matrisome	GO:CC not extracellular matrix	A0A286ZID6	A0A286ZID6	A0A286ZID6_PIG	0	3638.59	4080.79	3844.28	4760.51	4403.16	2677.73	0	3231.52	3545.61	4639.26	5288.13	2772.47	0	4484.83	0	4573.77	4566.3	5329.53	2055.87	0	1341.11	1736.48	2844.86	2515.59	5374.96	0	2411.75	0	4710.32	0	1462.5	2111.27	1993.07	1402.3	2043.71	1360.09	1491.81	1926.71	0	0	1867.35	1396.49
DAZAP2	Non-matrisome	Non-matrisome	GO:CC not extracellular matrix	B6VAQ0	B6VAQ0	B6VAQ0_PIG	0	0	655.992	0	0	0	1631.86	0	0	0	0	0	1482.72	0	0	0	0	447.663	0	0	986.32	0	0	0	0	3548.93	0	0	0	1160.96	1960.93	0	0	587.079	617.041	0	619.367	0	0	0	0	0	0
DBI	Non-matrisome	Non-matrisome	GO:CC not extracellular matrix	P12026	P12026	ACBP_PIG	0	58602.2	138305	187455	188215	206212	170068	81434.7	78611.2	37719.6	40712	140864	82159.7	0	161092	8238.62	295055	330072	246021	3869.67	7836.09	0	8129.94	23340.5	2989.54	11182.6	0	0	0	0	0	3369.44	10946.8	0	5270.04	19760.5	0	2728.75	4194.9	2539.5	2249.35	0	0
DBN1	Non-matrisome	Non-matrisome	GO:CC not extracellular matrix	A0A287B4F5	A0A287B4F5	A0A287B4F5_PIG	0	3997.81	0	0	5366.18	3369.75	7076.49	13865.8	11735	9448.54	9724.02	5915.46	4831.37	0	1534.52	5994.65	3042.46	1577.2	1966.9	6352.67	3453.33	1117.62	2741.5	3056.1	2916.82	6892.39	7709	8393.11	8026.5	11465	6969.53	1443.85	3648.35	0	2748.26	3600.58	2922.29	0	0	0	0	1046.01	0
DBNL	Non-matrisome	Non-matrisome	GO:CC extracellular matrix (GO:0005576, GO:0005578 & GO:0031012) & GO:CC not extracellular matrix	F1ST81	F1ST81	F1ST81_PIG	0	1405.62	0	2125.96	2016.79	2296	3008.77	6767.31	4457.19	4572.74	7105.74	0	5065.21	0	1689.71	0	2281.1	1656.94	1616.14	1719.79	0	0	592.338	1508.2	776.617	0	0	3346.86	0	1383.16	0	0	0	870.327	0	1315.22	0	0	1709.89	0	0	1428.55	0
DBT	Non-matrisome	Non-matrisome	GO:CC not extracellular matrix	A0A5G2QFH7	A0A5G2QFH7	A0A5G2QFH7_PIG	0	8135.85	6923.74	5817.81	6913.14	9394.17	3453.67	8593.6	3338.67	6041.25	8352.15	7733.32	5791.79	0	12553	0	11317.1	7196.37	8889.39	18676.1	5219.34	17343.3	24385.9	14447.1	16377.2	4194.39	7819.73	5456.04	3068.23	5573.1	2410.64	12276	8914.15	12818.4	21013.3	10829.6	15271.9	4147.45	5353.55	11970.8	4444.44	6959.16	6401.23
DCAF11	Non-matrisome	Non-matrisome	GO:CC not extracellular matrix	A0A8D1GPS1	A0A8D1GPS1	A0A8D1GPS1_PIG	0	0	0	0	0	0	0	0	0	0	0	0	0	0	707.845	0	0	0	0	0	0	0	811.49	1297.19	1905.86	0	0	0	0	0	0	0	858.372	0	0	977.672	0	0	0	0	0	0	0
DCAF6	Non-matrisome	Non-matrisome	GO:CC not extracellular matrix	A0A287A3W6	A0A287A3W6	A0A287A3W6_PIG	0	1915.05	2472.72	2655.66	1613.97	2551.59	0	0	0	0	0	0	0	0	2534.49	0	2028.17	0	1624.14	2632.06	0	3037.65	3307	2107	2835.94	0	0	0	0	0	0	2425.28	2317.55	2100.85	3174.03	2057.04	2281.28	1055.19	2684.61	0	2556.73	2153.93	2403.52
DCAF7	Non-matrisome	Non-matrisome	GO:CC not extracellular matrix	A0A287BIR3	A0A287BIR3	A0A287BIR3_PIG	0	2868.68	1134.5	2487.8	2244.49	2254.57	0	3221.65	0	8028.81	4896.89	4625.24	1570.53	0	2423.79	0	1882.28	1789.16	2686.11	1563.92	3980.1	2453.28	1810.27	2259.91	1877.14	654.715	0	0	0	2152.66	0	1098.71	2425.61	2604.02	1900.6	2245.54	2174.78	0	1031.26	0	3287.62	1140.13	2531.6
DCAF8	Non-matrisome	Non-matrisome	GO:CC not extracellular matrix	A0A287AT04	A0A287AT04	A0A287AT04_PIG	0	7937.25	13053.6	6407.34	5682.1	5793.85	21076.1	0	9741.65	7750.19	4147.39	0	8848.38	0	2890.93	0	5189.74	2260.15	2813.54	8809.94	11347.3	8329.86	7338.93	5532.5	8619.91	0	14257.2	16206.9	0	12654.5	9734.49	2760.9	7422.79	8649.21	10321.2	7533.4	16269	3848.38	6542.75	7992.37	0	5524.22	12536.5
DCAKD	Non-matrisome	Non-matrisome	GO:CC not extracellular matrix	F1RR05	F1RR05	F1RR05_PIG	0	2132.19	2981.25	1409.1	2976.63	850.96	3280.5	0	3429.39	1529.03	2093.4	6731.88	3842.4	0	1964.51	0	1519.47	680.513	1635.57	1797.19	2298.28	1261.31	1432.99	1231.46	2190.77	7804.63	4458.16	3209.94	4215.34	2645.63	3482.77	2047.41	2408.35	1980.16	2788.15	1023.84	751.016	3562.16	3520.03	0	8239.53	1967.67	5082.87
DCLK1	Non-matrisome	Non-matrisome	GO:CC not extracellular matrix	A0A286ZLR2	A0A286ZLR2	A0A286ZLR2_PIG	0	6868.9	5236.73	6546.3	19363.5	3409.57	25952.8	32774	23746.7	42631.8	33602.1	49871.9	30168	0	1181.87	0	3909.4	2471.73	2456.58	13455.5	12070.2	2556.26	3412.56	2335.51	3061	59038.3	9999.32	39321.7	25761.5	22735.9	25234.4	7056.78	4026.69	5483.69	6506.93	5418.88	7437.45	4769.58	3334.48	4032.31	5408.72	4324.05	5361.72
DCN	Core matrisome	Proteoglycans	GO:CC extracellular matrix (GO:0005576, GO:0005578 & GO:0031012) & GO:CC not extracellular matrix	Q9XSD9	A0A5G2RB02;Q9XSD9	PGS2_PIG	0	828779	599568	379033	1528400	475962	2199070	3872410	3726020	3646700	4215900	2795600	2977400	0	197100	247337	578647	122061	170808	1645770	1381110	244951	448334	236450	170635	4304590	9153330	6489310	4660560	2063270	6740710	235978	171936	353584	431925	224876	284619	20692.5	22138.6	66589.1	24123.4	16606.2	47080.4
DCP1A	Non-matrisome	Non-matrisome	GO:CC not extracellular matrix	I3LHS8	A0A5G2RF90;I3LHS8	DCP1A_PIG	0	0	0	0	0	0	0	0	0	0	0	0	0	0	0	0	0	0	0	1772.56	0	1045.43	658.622	806.826	0	0	4767.42	6651.2	4508.76	1966.76	6247.93	0	1616.18	881.321	1475.73	801.383	1285.19	0	0	0	0	0	0
DCP1B	Non-matrisome	Non-matrisome	GO:CC not extracellular matrix	I3LE95	I3LE95	I3LE95_PIG	0	0	0	0	0	0	0	0	0	0	0	0	0	0	0	0	0	0	0	0	0	0	0	0	0	0	0	0	0	0	0	0	0	0	0	0	0	0	0	0	0	0	1492.15
DCPS	Non-matrisome	Non-matrisome	GO:CC not extracellular matrix	Q8MIZ3	Q8MIZ3	DCPS_PIG	0	4694.67	7434.21	5953.72	8122.97	7386.55	6001.79	5578.36	4633.13	0	6470.35	9663.15	4156.32	0	7334.04	0	10850	6639.36	5517.57	4012.69	4211.07	4816.93	4508.74	4475.8	4396.81	0	0	0	0	1893.99	0	1958.23	2764.62	2743.31	4847.93	2850.74	2841.53	0	1405.58	0	0	1691.81	0
DCTN1	Non-matrisome	Non-matrisome	GO:CC not extracellular matrix	A0A287B8J2	A0A287B8J2	DCTN1_PIG	0	7839.39	7215.2	7116.54	8685.42	6800.01	9983.61	10665.7	11560	14724.5	14368.7	16634.1	9465.87	0	5157.52	0	4390.27	5648.06	5571.49	8765.67	13366.3	5233.12	6841.63	7853.98	6338.06	21338.8	10470.4	13002	7044.16	11961.1	12344.7	5652.06	7019.13	8446.09	7366.85	7920.83	7166.28	8672.04	7872.01	12571.8	7136.98	8627.19	7619.24
DCTN2	Non-matrisome	Non-matrisome	GO:CC not extracellular matrix	A0A5G2QD80	A0A5G2QD80	DCTN2_PIG	0	13043.4	10507.2	9366.75	13229	10187	12960.9	19373.2	17580.3	18914	19175	17037.3	17652	0	13411.7	37556.8	9657.1	8422.4	9016.28	13558.1	7877.86	7670.96	8644.54	11749.6	9424.82	12934.1	12286.6	11542.5	10069.5	15036	10801.3	5836.37	7476.26	7121.46	12840.3	9732.4	5961.73	8373.96	4604.24	7061.66	8109.61	3790.45	3805.57
DCTN3	Non-matrisome	Non-matrisome	GO:CC not extracellular matrix	F1SEC0	F1SEC0	DCTN3_PIG	0	4080.53	3978.4	5033.41	3693.2	6376.89	6510.32	4031.72	6152.84	10240.4	7214.34	6779.96	5950.25	0	1724.18	5216.3	3742.98	3044.53	3586.83	5161.73	11664.8	2854.96	3075.14	5980.61	7349.12	3413.01	0	6724.29	0	5408.22	0	0	4267.65	4169.68	6475.11	3467.72	3429.87	0	1912.83	7661.96	0	0	0
DCTN4	Non-matrisome	Non-matrisome	GO:CC not extracellular matrix	A0A4X1TB62	A0A4X1TB62	DCTN4_PIG	0	2105.5	1537.72	2779.48	1826.59	1722.29	4398.55	1719.19	2024.83	2170.01	3456.72	0	1668.98	0	1268.96	0	1158.47	2069.47	1721.14	2416.42	0	2229.62	2312.14	1906.12	1762.99	2492.84	0	0	0	3765.39	0	1840.14	1785.74	2330.74	2262.29	1733.47	2175.34	1206.04	1642.79	0	1743	1973.85	0
DCUN1D2	Non-matrisome	Non-matrisome	GO:CC not extracellular matrix	A0A286ZYM7	A0A286ZYM7	A0A286ZYM7_PIG	0	0	0	2527.28	0	3456.59	0	0	0	0	0	0	0	0	2099.39	0	0	2740.6	923.009	2839.61	0	5233.41	5556.07	6259.03	4976.75	0	0	0	0	0	0	4312.78	3992.48	4428.61	4097.04	2612.41	3629.83	0	0	0	0	1403.48	0
DCXR	Non-matrisome	Non-matrisome	GO:CC not extracellular matrix	A0A286ZQ44	A0A286ZQ44	A0A286ZQ44_PIG	0	7859.85	8184.33	9161.71	16406	9270.44	8297.24	7568.82	8146.16	11671.1	10438.3	8661.81	10468.9	0	7649.8	21376.9	20560.1	5736.98	9542.97	7870.7	0	5557.41	6573.36	8916.31	5605.14	14366.2	9683.66	11707.3	7104.34	12724.3	8709.9	6055.75	6326.73	5698.9	9029.56	5855.43	7107.77	6818.76	5708.78	4779.69	9827.09	6378.19	6757.85
DDAH1	Non-matrisome	Non-matrisome	GO:CC not extracellular matrix	A0A287BBK0	A0A287BBK0	A0A287BBK0_PIG	0	3656.5	5981.09	6465.7	8766.17	5956.74	0	0	6430.54	6297.47	3824.87	0	5490.66	0	4772.25	0	5264.97	6662.09	5668.22	2088.2	0	2601.21	2401.79	3325.47	0	0	0	0	0	2594.54	0	0	1811.54	2683.98	1802.47	2097.2	0	0	0	0	0	0	2209.43
DDAH2	Non-matrisome	Non-matrisome	GO:CC not extracellular matrix	A0A287A5S7	A0A287A5S7	A0A287A5S7_PIG	0	7044.15	6953.67	5564.67	10293.4	5204.78	12536.9	13598	13187.9	22918.4	16307	9184.62	14027.3	0	5578.03	0	6639.86	4398.85	5234.02	4356.66	0	1040.94	1260.73	822.664	0	6115.19	10404.3	12117.9	0	6954.46	7606.33	0	0	0	0	720.557	0	0	0	0	0	0	0
DDB1	Non-matrisome	Non-matrisome	GO:CC not extracellular matrix	F1RIE2	F1RIE2	F1RIE2_PIG	0	16808.1	14088.2	15828.6	16459.6	13234.5	13838.6	11847.8	11814	15167.5	11379.3	19569.3	7930.56	0	14659.6	32926.3	15725.1	10459.6	13679.1	5584.35	6353.83	4258.33	4012.4	8603.89	3697.32	10749.7	14164	10938.7	4869.21	7843.91	3586.08	7699.1	7265.07	5171.8	4752.51	8138.18	5108.04	9645.25	10322.4	13571.3	8715.2	8874.93	10961.4
DDB2	Non-matrisome	Non-matrisome	GO:CC not extracellular matrix	F1SIC1	F1SIC1	F1SIC1_PIG	0	0	0	0	0	0	0	4401.07	0	3642.01	6054.98	6731.89	0	0	0	0	0	0	0	0	0	0	0	0	0	0	0	4245.68	0	0	0	0	0	0	0	0	0	0	0	0	0	0	0
DDHD2	Non-matrisome	Non-matrisome	GO:CC not extracellular matrix	F1RZJ5	F1RZJ5	F1RZJ5_PIG	0	0	1328.65	1941.2	2001.13	1636.42	8057.39	3320.6	2677.99	4083.98	6439.23	4956.7	6900.08	0	792.684	0	1085.26	1326.75	1500.13	1550.74	4967.84	0	0	1522.34	907.878	7543.9	5710.16	11246.9	12297	5002.79	8280.32	0	1528.67	1715.35	0	2639.1	966.227	0	0	0	0	0	0
DDO	Non-matrisome	Non-matrisome	GO:CC not extracellular matrix	A3KCL7	A3KCL7	OXDD_PIG	0	1829.28	0	0	1319.11	1985.04	0	0	0	0	0	0	0	0	2101.89	8662	2831.13	1891.34	1995.55	0	0	0	0	949.214	0	0	0	0	0	0	0	0	0	0	0	886.599	0	0	1103.08	0	0	1155.16	0
DDOST°	Non-matrisome	Non-matrisome	GO:CC not extracellular matrix	A0A287AGM8	A0A287AGM8	A0A287AGM8_PIG	0	6763.27	2573.99	5603.17	9966.42	3564.17	23411.7	22736.5	15479.7	48944.4	41250.5	14886.2	30049.8	0	3492.67	0	4387.39	2927	2687.14	18885.9	15433	10104.4	5495.76	12072.3	16541.5	39832.7	91705.9	64105.1	66130.9	64029	42061.2	10746.2	10665.8	8916.44	19504.7	7570.31	5014.62	15017.4	8387.26	18773.5	18205.9	12701.9	7727.93
DDOST^	Non-matrisome	Non-matrisome	GO:CC not extracellular matrix	Q29381	Q29381;A0A287AGM8	OST48_PIG	0	45941.7	26841.5	45427.6	68099.7	29863.9	93508.9	125513	76313.6	195503	164483	66536	99437.5	0	16412.5	68112.4	33564	17525.6	24029	92424.2	88182	30047.5	36323.2	44824.7	45361.6	161359	174739	171619	116004	216272	167763	38541.5	41920.8	47381.9	60702.8	38857.8	31817	39538.1	34072.1	30345.4	41903.9	24267.7	36229.9
DDRGK1	Non-matrisome	Non-matrisome	GO:CC not extracellular matrix	A0A287BPF3	A0A287BPF3	A0A287BPF3_PIG	0	8569.72	5740.48	4934.13	6755.4	4547.04	5188.15	10938.6	6618.98	12870.5	8247.54	7478.12	8527.58	0	3302.2	0	6146.68	2212.45	3309.15	9048.42	7969.63	5212.64	7409.04	6097.82	5845.51	9530.72	5210.33	11323.9	3702.06	5140.27	5184.6	6099.07	5931.1	5064.96	9813.35	6256.13	6705.92	4607.26	4727.25	4237.72	4755.63	4171.64	4903.97
DDT	Non-matrisome	Non-matrisome	GO:CC not extracellular matrix	A0A8W4FG18	A0A8W4FG18	A0A8W4FG18_PIG	0	12156.2	14815.3	16169.8	18814.2	11482.5	25766.5	16890.3	13816.8	7638.89	12185.6	11874.5	19103.3	0	16985.6	42408.7	28397.5	10454	12901.2	0	0	0	0	2815.4	1061.72	0	0	0	0	2591.85	0	0	0	0	0	2479.73	0	0	0	0	0	0	0
DDX1	Non-matrisome	Non-matrisome	GO:CC not extracellular matrix	F1SCS1	F1SCS1	F1SCS1_PIG	0	11172.6	12710.4	12996.5	13510.9	11626.7	13880.1	22118.2	12215.2	21664.6	16617.1	19245.2	18727.4	0	12227.7	19007.6	9729.94	11569.3	8778.55	8298.43	17661	11241.6	10351.7	8522.21	11476.2	16698.7	15374.5	11361.5	10950.6	22613.1	8001.9	8557.16	10902	11076.8	12053.6	10278.9	9266.01	11609.5	7264.38	8877.02	11226.8	9027.81	13043.6
DDX10	Non-matrisome	Non-matrisome	GO:CC not extracellular matrix	F1SV16	F1SV16	F1SV16_PIG	0	0	0	0	0	0	1825.27	5621.17	0	5092.72	2300	3997.26	0	0	0	0	0	0	0	1400.11	2902.55	1104.3	817.695	0	1241.09	9549.67	0	10922.3	4490.4	7102.57	10098.5	0	847.423	687.022	1159.55	429.791	1098.81	0	0	0	0	0	0
DDX17	Non-matrisome	Non-matrisome	GO:CC not extracellular matrix	F1SKQ0	F1SKQ0	F1SKQ0_PIG	0	6700.45	3521.77	5426.38	7283.22	3821.17	7678.92	13525.1	11597.3	17331.7	16651.3	10699.5	12740.8	0	4497.01	0	3594.45	2654.18	4924.24	3581.2	2282.02	2670.41	2161.05	2862.57	2867.81	8255.82	6550.18	8081.92	0	10932	9761.24	2409.89	3157.65	3245.05	2856.52	4663.65	2192.08	5100.16	3924.32	6605.28	4367.16	4578.57	5106.22
DDX18	Non-matrisome	Non-matrisome	GO:CC not extracellular matrix	I3L7B7	I3L7B7	I3L7B7_PIG	0	3703.72	2593.49	2712.58	3022.75	1901.67	4802.28	9367.23	4720.03	9525.3	7287.75	9486.01	7024.52	0	1413.7	0	2088.91	1898.69	2297.4	2381.57	4292.97	2623.46	4355.48	3195.28	3017.74	16748.9	10184.3	16936	9159.68	13535.5	5681.35	5286.58	3110.24	2190	4113.2	2738.99	3871.07	3637.58	3052.08	2860.33	4490.42	2533.86	4861.85
DDX19A	Non-matrisome	Non-matrisome	GO:CC not extracellular matrix	A0A480Q3H5	F1S432;A0A480Q3H5	A0A480Q3H5_PIG	0	1989.15	4769.88	2842.51	2714.85	3388.19	0	2839.97	0	5055.55	6483.45	3776.33	3827.49	0	2008.14	0	1847.93	2190.56	2303.97	3573.87	6871.03	3398.6	3801.68	2660.83	3879.46	11598.5	2909.81	12101.2	12596.7	11266.4	10416.5	3747.21	3737.03	5087.93	3996.35	4063.53	4743.53	5929.15	3731.75	6166.96	6703.13	4535.09	5587.81
DDX21	Non-matrisome	Non-matrisome	GO:CC not extracellular matrix	F1SUG7	F1SUG7	F1SUG7_PIG	0	0	0	0	1518.22	933.224	0	2832.61	2668.68	3745.19	3432.03	2676.55	2630.72	0	615.955	0	0	0	0	1328.84	0	1502.99	1249.34	0	1293.49	5569.51	4402.04	0	0	5676.36	2998.65	0	1012.27	0	1185.67	1265.42	535.739	1782.39	1116.82	0	0	1272.36	0
DDX23	Non-matrisome	Non-matrisome	GO:CC not extracellular matrix	F1SPN4	F1SPN4	F1SPN4_PIG	0	3996.3	0	1710.62	3688.55	2732.6	2430.2	5232.05	4250.97	7789.59	6339.09	0	2860.16	0	1090.48	0	0	1236.2	0	3116.53	0	2762.62	1598.28	1983.58	0	0	0	0	0	2465.43	0	0	2418.94	0	0	2989.63	0	0	1540.21	2276.75	0	0	0
DDX39A	Non-matrisome	Non-matrisome	GO:CC not extracellular matrix	A0A287BN69	A0A287BN69	A0A287BN69_PIG	0	624.219	0	1166.99	806.67	1020.5	0	0	0	0	0	0	0	0	518.907	0	449.419	743.301	0	0	0	0	660.947	773.32	0	5164.71	0	3663.12	0	11628.8	1904.11	0	702.205	0	0	888.362	0	0	0	0	0	839.429	0
DDX39B	Non-matrisome	Non-matrisome	GO:CC not extracellular matrix	Q29024	Q29024	DX39B_PIG	0	16483.1	13553.5	19804.7	21407.9	18066.2	16548.2	20257	18200.7	19411.5	33662	22742.8	18711.9	0	18286.4	0	20206.4	14788.6	15271.6	6484.74	21688.5	6924.72	8368.21	14142.3	8454.63	17626.7	20315.3	17866.3	23577.9	39219.9	16464.2	11554.5	10321.9	14947.9	12046.3	13457.8	11593.2	17205.1	11065	17311.2	12461.6	13787.3	14079.7
DDX3X	Non-matrisome	Non-matrisome	GO:CC extracellular matrix (GO:0005576, GO:0005578 & GO:0031012) & GO:CC not extracellular matrix	F1RX16	A0A287A1E6;F1RX16	F1RX16_PIG	0	34411.4	27431.6	30523.3	27879.9	24540.9	34377.2	51136.5	36940.4	40280.9	56876.5	52216.1	40072.8	0	21432.4	22374.6	16257	24867.9	20981.4	36195.7	46148.5	28993.1	42191.7	20054.4	29118.8	78620.2	37312.1	42859.5	33741.8	93705.6	48397.5	33470.6	28815.5	27314.7	36967.5	28798.1	44588.3	34473.5	24419.5	31455.1	25966.8	29777.6	29399.7
DDX4	Non-matrisome	Non-matrisome	GO:CC not extracellular matrix	Q6GWX0	Q6GWX0;A0A5K1UMM8;A0A287A1E6;F1RX16	DDX4_PIG	0	8378.71	5276.46	6714.2	6136.58	3950.95	0	4562.12	6136.04	12295.2	7644.2	9673.52	8835.28	0	5275.13	0	3289.82	0	3514.72	5130.88	0	3729.1	6437.64	0	5534.67	8989.75	0	8446.49	0	19946.1	7313.62	3820.02	5257.25	5041.73	5676.87	4692.39	5005.13	6387.74	3587.94	5913.6	7258.77	3980.58	4102.24
DDX42	Non-matrisome	Non-matrisome	GO:CC not extracellular matrix	F1RSJ7	F1RSJ7	F1RSJ7_PIG	0	1868.29	0	0	1904.13	2637.25	0	2840.87	2315.73	4758.88	3942.58	5168.89	2283.87	0	1679.56	0	1628.85	1604.56	1550.2	0	2376.58	3085.81	1683.71	2112.31	1723.23	0	0	0	0	2845.77	0	0	1600.23	1547.92	1514.56	1174.44	0	0	1409.35	0	0	1531.01	0
DDX46	Non-matrisome	Non-matrisome	GO:CC not extracellular matrix	A0A5G2RAE1	A0A5G2RAE1	A0A5G2RAE1_PIG	0	3896.53	2049.57	2782.03	4710.25	3008.69	5912.58	13323.7	8333.77	17106.2	13630	17754.6	9337.83	0	1801.06	0	1879.25	1769.59	1311.3	2847.34	2890.5	2514.33	3871.98	2098.49	2181.54	15596.5	6292.69	9422.51	5167.2	8174.96	3380.16	3793.74	2282.38	3125.34	2814.04	3591.95	2490.27	3047.88	1332.35	1245.24	3701.23	2575.42	1754.28
DDX5	Non-matrisome	Non-matrisome	GO:CC not extracellular matrix	A0A287AHW6	A0A287AHW6	A0A287AHW6_PIG	0	11722.6	10691.6	9260.68	13373.5	10502.4	14438.9	33859.3	23508.1	25010.8	34726.6	28624.6	22829	0	3316.6	0	7631.87	12729.2	8922.71	6034.38	11297.7	5750.41	5377.66	6715.61	5191.45	13862.5	18358.2	0	16069.8	4433.07	0	8191.3	7246.36	9178.47	7160.49	9380.03	4867.12	0	1452.64	2699.95	1992.82	7491.38	5819.72
[truncated: 3,964 more rows]
[truncated: 30 more columns]

## Sheet: List of Isoforms
Annotated.Gene	Annotated.Matrisome.Division	Annotated.Matrisome.Category	GO.term	Protein.Group	Protein.Ids	Protein.Names	First.Protein.Description	PDeCell_P72_N_c	PDeCell_P71_N_c	PDeCell_P70_N_c	PDeCell_P69_N_c	PDeCell_P68_N_c	PDeCell_P67_N_c	PDeCell_P66_N_t	PDeCell_P65_N_t	PDeCell_P64_N_t	PDeCell_P63_N_t	PDeCell_P62_N_t	PDeCell_P61_N_t	PDeCell_P60_N_m	PDeCell_P59_N_m	PDeCell_P58_N_m	PDeCell_P57_N_m	PDeCell_P56_N_m	PDeCell_P55_N_m	PDeCell_P54_D_c	PDeCell_P53_D_c	PDeCell_P52_D_c	PDeCell_P51_D_c	PDeCell_P50_D_c	PDeCell_P49_D_c	PDeCell_P48_D_t	PDeCell_P47_D_t	PDeCell_P46_D_t	PDeCell_P45_D_t	PDeCell_P44_D_t	PDeCell_P43_D_t	PDeCell_P42_D_m	PDeCell_P41_D_m	PDeCell_P40_D_m	PDeCell_P39_D_m	PDeCell_P38_D_m	PDeCell_P37_D_m	PDeCell_P36_B_c	PDeCell_P35_B_c	PDeCell_P34_B_c	PDeCell_P33_B_c	PDeCell_P32_B_c	PDeCell_P31_B_c
[truncated: 278 more rows]
[truncated: 30 more columns]
